# Supplementary material for: Systems level analysis of the Chlamydomonas reinhardtii metabolic network reveals variability in evolutionary co-conservation
Source: Royal Society of Chemistry journal article supplement (doi:10.1039/c6mb00237d), 2016-06-14
Supplement: c6mb00237d1.xlsx [file c6mb00237d1.xlsx]

## Sheet: Table S1
Table S1 Protein sequences in the network
>Au5.s6.g12413.t2
MDDGLIEGVGAMTRFVNLLVSDPEISRVPFMIDSSKFHIVEAGLKCSQGKCIVNSISLKEGEAAFRHQAEVVRRHGAAVVVMAFDEQGQAASYEEKIRICSRAYRILVEEVGFDPQDIIFDPNILTIGTGLPEHNNYAVDFIRATREIKRLCPGSKVSGGVSNIAFSFRGNEAVRRAFHSAFLHHACLAGMDMGIVNAAQVKEDEYSKIDKELLEFVEDVLLNRRQDSTERMLEYAATLDPKSKPTAVVRLGGASSGPKITPRLNPIPAGKDQLAPDAKPAPVPKYKAWKDGVKPTAAFVPLDKLMRERIIFIDGAMGTQIQKFTLEEEDFRGERYAKHSHEIPGNNDLLVITRPDVISKIHTAYLEAGADIIETNTFNGTWISQSDYELQADEEVALI…
>jgi|Chlre3|179961
MLPSWPLQRYRAQRMGGDFTSERLNAFRRAQLNRLRDIRLDEQLLLAVRKVAAQCGGLGGRLRQLTLTEAGAYESAYGNRFERVPEEFTREPLIGPLRGIEALAALPHLHTLSLTGLDCPPLALLQALPYGGGPLRHLALRKAQADAAIITRVLPRCGVTAASVFGMRSCRPTYDVFQALAAATSLTSLSVQWLMLVLTRFS
>CRv4_JGI3.117996.t1
MGVAGCGKSSVGTALARALGAPFLEGDELHPPENIAKMRSGIPLTDEDRWPWLYRIRERIAKALEFGDRLVVSCSALKPVYRNLLCWGAPDPHSTAARSCTSTAAASTGITAAAATPSSPGASRVAYILLQPSEADLRRRLAARAAAGGHFMPPSLLGSQLAALEVQPEEMWAVVEPRQRRQQQGAGHGAAAAVAGEVTPADGPHCQELVFPAAEVIATELAARLQHP
>CRv4_Au5.s10.g33.t1
MLARAPSNKGASLAAGCSQSGGALQTRVQSIGTRRAAGSSQAPLANVAGAGSAAVAVTGRRASRLARLPNLSVAAQAGRGGKGSGGTDEEPDWEAEMSIFNQRISRPNQLATLRELEAKTAVGKVLYSRDGLVIVSGLNADAPLGTKVSFLTGTAGVLLWHRSDNLSFCLVLGDPATVVEGTPVECKIKGVLQVRLVGCGHWVGLPVALVVDDVKGPVTRKDFDVFTVPAGDDTFGRVHDHIGRHLPAFDSPQQQQQPQEAAGGKGAAAGSARVAPPVTRPLLNAQVEMKNREQINESLLTGVKGLDILTPLGRGASLLVIGPGGAGKTRLALDAIMAQAAFYGGGSSGAAVAPPGGVVRCVLALAGRPDSEVQAIVSELRSSGALANTAVVTAGESAP…
>CRv4_Au5.s10.g48.t1
MSGFFSRHSNVYIYVPNLIGYARVAAALYAFAVAFTSPFQCVAAYFLSFVCDELDGRFARMFNQTSTFGAVLDMVTDRLATTGLLLLLCMVYPAMHVVCVSLIFLDIFSHWFQMYSTLAAGSATHKDVKSKSWLVRTYYSNRLFMGYCCVSCEVLYLVIYASKWPELMGIVVPLPAGVTLTLPSQVTAVAPALASFTAASGLPLMTLFGLMSLPGFFTKQICNWVQLQNASDSLIALDQRKEQGKAR
>CRv4_Au5.s10.g58.t1
MQALSSRVNIAAKPQRAQRLVVRAEEVKAAPKKEVGPKRGSLVKILRPESYWFNQVGKVVSVDQSGVRYPVVVRFENQNYAGVTTNNYALDEVVAAK
>CRv4_Au5.s10.g65.t1
MCPPSGPFYRVAGMSYVRYANLCADYLRAVMKEPFKTKALARQTVYFRSTPVSDGKQGVATLLETTGMPKQTPSS
>CRv4_Au5.s10.g84.t1
MELKTSDESENLLRIRHSCAHIMAMAVQRLFKGVQVTVGPWTDRGFFYDFAWPADSPLTEKDLKKIKKEMAKIMKANLPFVKEEVSPAEAEARIRAQGEPYKLEILQSILQRDPNAPITIYHIGDPAGPAAATAAAPAAEAEVGAAEAPKPAGPKPVAPWWDLCAGPHVERTGDINPDAVELENVTGAYWRGDEANAMLTRVYGTAWETPEQLAAFKQLKEEAAKRDHRKLGAELNLFSIQESSGGGLVYWHPPGAMVRHLIESFWKELHLQRGYQLVYSPHIAKADLWKTSGHLDFYRENMYEQMKVEDETYQLRPMNCPFHVSVYKDGYYSYRDLPLRLAELGTVYRYERSGTMHGLFRVRGFTQDDAHIFCLPNQITTEIKGVLDLVEEILGTFGF…
>CRv4_Au5.s10.g86.t1
MDAAPQKAQATQQDWTPKTTASDSVLAVWRKADAVCFDVDCTITVNDSLDLLAEFMGVKEQVEILTNKAMDGSLSLEQALEERLNIINCSPDDIKRFIKAHPPASRMAPGIKELINSLQARGKAIYLISGGFRELTLPIAAYLGIPKENVFANRMNWQWDDETGMPTKLVGFDMSEPTAHNQGKPQAIARIRQRNPYNTVVMIGDGITDLEAVQTTGGADLFIGSGVVVERPAVAREADWYVYDYTDLLRTMARYSVAMVGSGAWACAAVRMIAQNTQVDDAADEFVDEVRMWVYEEDFEGKKLTEVINQTHTNPKYFPGFDLGPNVVAVPNIVDAVADADLIVFCAPHQFLHHICKQLVGKIKPGAAAISLTKGMRVRPEGPQLISQMVRRLLGIDCC…
>CRv4_Au5.s10.g101.t1
MVALTTGSLSAASELTLASDGWRVIHVAPVANPGKGPQPGLGYPARFAYVYTKLYIFKMTEYKKIVFIDADVLVLRNMDSIFKCPGFCAALRHSERFNTGVMSLVPSQELYDDMMAKVASMPSYTGGDQGFLNSYFSGFAHAPLFDPDTPYTSDQYKYMRLPTTYNADVGLFVVGSNRWMLPRDTLYVIHFTLGPFKPWVWWSGWLVRENPAWEAVRGRLPPDSRGLKAGTTPRQLFYERWMIALPVAAFAAIAYLAWASLAPAVKEGLSGLTNILRRRGGAGGGYGLLGGSGGAGGAGAGGAGSHGVSGADVVLKMSPAGNASAGDVFPRFFMAGALAAGYGCVVLATIITILMVPYEVEPLYGWTLSYLWGFLLLGTCYGLFLRACFAAGRRAGLHP…
>CRv4_Au5.s10.g104.t1
MQRTGGLVSQLAGAQLTGALQELKTGVLLAFSTAAPAAGAPPPPPPPPAKTSFGGLKDEDRIFQNIYGRHDLSIKGAMSRGDWYMTKEIIGKGRDWIIDQMKKSGLRGRGGAGFPSGLKWSFMPKASDGRPSYLVVNGDESEPGTCKDREIMRHEPHKLVEGCLMAGVAMGARAGYIYIRGEFVQERRAVERAISEAYAKGFLGKNACGSGVDFDLMVHYGAGAYICGEETALIESLEGKQGKPRLKPPFPAGVGLYGCPTTVTNVETVAVSPTILRRGPEWFSSFGRKNNAGTKLFCISGHVNRPVTVEEEMSIPLKELIERHAGGVRGGWDNLLAIIPGGSSVPLLPKKICDGVLMDFDALKEAQSGLGTAAVIVMDKSTDVIDAIARLSYFYKHES…
>CRv4_Au5.s10.g117.t1
MADPLNRIQKIASHLDPAKPRKFKVALLGAAGGIGQPLSLLLKMSPYVSDLALYDVANTPGVAADVSHMSTAARVRGYLGPDQLGAALTGAALVIIPAGVPRKPGMTRDDLFNINAGIVRGLAQGIAQHCPAAWVAIISNPVNSTVPIAAEVLQKAGVFNPAKLFGVTTLDVVRAEAFIGELTGTDPRDVHVPVVGGHAGVTILPLLSQARPPLPASMSAEARKALMVRIQDAGTEVVQAKAGAGSATLSMAYAAARFADSCLRAMSGEGPVSEYAYIRHPPRLSSGSGSSVAVDLPYFSSPVRLGRLGVEEVLPLGPMDALEADNFAAMKAELLGSIKKGVEFAAKGPAPAK
>CRv4_Au5.s10.g122.t1
MERRPQILLAATGSVASIKVATLCRLLLEIGDVKLIVTSSAKHFINEDELPDAVKPILGDETEWRQWRAVGDPVLHIDLRRWADVLVVAPLSANSLAKLANGMADNLLTCVVRAWDFRKPLLVAPAMNTAMWASPFTARHLDTLTQLGAGAGSSSSSGGGGSSAAAGASSGGCSTVVVVAPVSKRLACGDEGTGAMAAPETIAAACRAAVQRVSLVAPEHAQQPQTQPEGAQDGRQGNHAGTHVSAGDAVASGSMAVAAVAAEAAAVAAPAAPSTSGRGGTGSEAAAEQGHAADGTAGPDVSGGSRNGSAEPAAAGAAAATVLGAGPGAGGEEVRAGVEGRARKRQRWGPEQQRTHGAVAL
>CRv4_Au5.s10.g124.t2
MPLLFLSLLHSAREDADMTGASGNGSKASKWIDLRSDTVTRPTPGMKAAMMDAEVGDDVWGDDPTVNELQAYAAQLFGKEAALFCPSGTMTNQIAIKVHTQPGDELICADNAHIYLYEGGGIAFNSGVQPKLLPSDRGRISAAQIAQSINMEDSHFPTTRLVCLENTANKGGGAFYSLEQMQAISTLCRERGLRLHLDGARLFNAFVEAGYGPGQVGPLFDSISICLSKGLGCPVGSLLLGTADFIRRAHRIRKVLGGGMRQAGFLAAAGLYALQNNVERLRDDHRRARRLGAVLSALPYVGAVAPVDTNIAIFTLAQGWDAKAIVESLKSRHILISTMAPGVLRLVTHLDVGDEDIDAVVDALQQLAATGEGKAAADGATAGGKAGGGAVGTQGGLNG…
>CRv4_Au5.s10.g135.t1
MALAIRSSLRAAAMGRKAFRQAVPVRVAPAQRVRSVTTASAEITAYSVEEKGPKDSLEYRMFFKQGAKEVSCWHEIPLYAGDGHLHYICEIPKETSAKMEVATDEPRTPIKQDVKKGKLRFYPYNINWNYGMLPQTWEDPGHTDATLGAAGDNDPVDVVEIGAAAAKRGGVYKVKPVGVLAMIDDGELDWKVIAISADDPKAALCNDVEDVEKHFPGEIQKVLEWFRDYKIPDGKPANKFGYDNKCMNKEFTLNVIKETHEAYVKLKSGARANSEELSLI
>CRv4_Au5.s10.g143.t1
MLPKPLVVVGSVNADLVLPIERLPKPGETLAAASIETVPGGKGANQAAAAARAGFPTFFVGQFGRDDPNASLLRNALLGCGVDLTHAAEVDGPCGTALILLQAGGENSIIIVGGANQAAWRLSDGVKALIAGAGAVLLQREIPEPVNVEVAKLAAAAGVPVILDAGGVEGPIDPTILPCLALLSPNETELARLTGLPTDTEAQVQAAAEQLMSAGVKSVLVKLGADGSLLLPGPGQPPLRQAAIRAEQVVDTTGAGDCFTATYAVAVLEGKAPAEALRFASAAASICVQRKGAMPSLPARAEVDTLLAKQ
>CRv4_Au5.s10.g148.t1
MAPIRRIYGFARGSSDGNKSMKELLGGKGAYLCEMARCGLNVPPGFTITTEVCEEFYANGGMLPEALKTEVKAAVAVVEADMGLKFGDVNTPLLVSVRSGAAVSMPGMMDTVLNLGLNDAIVEGFAAKYGARFAMDCYRRLMQMFGDVVLEIPHEAFEAKLAALKGRKGVQYDVQLDADDLRELIAAYKQVYAEHKQELPQDPWQQLYLGINAVFKSWNIPRAIKYREINKITGLKGTAVNVQTMVYGNMGESSGTGVCFTRNPANGASELFGEFLINAQGEDVVAGIRTPMPIKLMADVMPPIYAELVANTTMLEKHMKDMQDVEFTVQEGRLFMLQCRSGKRTGTAALRIALELQAEGIIDRDEAVLMVEPRHLDQLLHPQFESDKGYAKDVITRGL…
>CRv4_Au5.s10.g155.t1
MFSRRVFGGTPDSFKLVLEYGRENTKAPMLGQVRLPMALATSEVTWNSEETVESVLERFTQAKSRVQLDRAEERLLVKLTPSPHGGDRVSLKLSVACLAPALRCVQVVRVTNSGNVSEPLLAALFKHCDLSGVWKLRGAEGFGNFWCSCCEVGSWAALANMNLSSCGLTALPAAVGALGSLRILRLSHNRLASLPPELSGLSSLEVLAADHNLLTALPAELRRCSALRHLELEGNRLATPVLDLRALSGLVSLQLYGNPLEYLPELSPASALRSLSLANVRIMADAAYTRWEVEVAALPYMSRVSHKLAPLFKLTFRRSSCQHPLLAGALGRISEDRAQCELMAREETAIQQLVLMALSEAPVVAEQACRTLGALAALGLGTARRLLAHDVLSTILTLL…
>CRv4_Au5.s10.g170.t1
MAALMQKSALSRPACSTRSSRRAVVVRAAADRKLWAPGVVAPEYLKGDLAGDYGWDPLGLGADPTALKWYRQSELQHARWAMLGVAGVLVQEIVKPDVYFYEAGLPQNLPEPFTNINMGGLLAWEFILMHWVEVRRWQDYKNFGSVNEDPIFKGNKVPNPEMGYPGGIFDPFGFSKGNLKELQTKEIKNGRLAMIAYMAFILQAQATGKGPLAALSAHLSNPFGNNILKNIGTCTVPHSVDVQGLTIPLTCLWPGSQ
>CRv4_Au5.s10.g221.t1
MLHSLSRLSPRVGLAFAAWESCTVQAWQHAIRRCASTGTSADPGQEVDVVIALGTNMGNRGLNLHRGLRRLRQLGLSVLRHSALYETAAAYVTDQPAFLNAAVLARTHLPPRELLRLLKQVEAEAGRDLAGGPRFGPRPLDLDIVFYGAAGYRDEVLEVPHPRWRERPFVTAPVADLLYRREEASAAAAGSSSSSSSTNGAGGSSGEAPGSVPLPYGHAGSVLGHLREVRGVWDASCSRRPQPPGSAGAGASSSVGGGGGGGAGAAGSGGGGEIMRRVTPLINMDAGPSSSGRSSTAGGSSSGADALLTWGVRTQLMAILNVTPDSFSDGGKFFPAGLGGADGGGAAGGAAAAGGLAAVVGAAEAMVREGADMLDVGGQSTRPGATRLTPEEELARVMP…
>CRv4_Au5.s10.g233.t1
MQMREVIEKLIVREDLTEKQAEEALGTLLDDFVTEQAAAFLVLLRAKGETPAEIAGLAKAMLDKALPVKTSQPVVDIVGTGGDGIGSVNISTGASILAAAAGAKVAKHGNRSVSSLCGSADVLEALGIAIDLGPAGVNHCLDQAGIAFMYAPRYHPGMKAVRPVRSALKVRTALNMLGPLLNPAEASYGLVGVYDTSISELMAGSLLRMGVQKALVVHSMGLDELTPMGPADVVEVTAGGPLKRYSLDPKEVGIPRCEVEDLKGGDAQLNAAILRDVFAGQKGAVADALCLNAGYALAACRVAATPAEGVKMAQEVQRRGDATATLQRWAEASQAAAAAEREQAHAVAA
>CRv4_Au5.s10.g252.t1
MTFSRLAPLLLLLALCIDHSFVGAQRKAVREGKDSISAGKPPLPLTPATAVPSRVATKPSFVVVLVDDLDQLLNSTDRTYLPLLHSLLGDQGLRLRNMAISSSTCCPSRTSLLTGLFTHNHGITANLPPYGGWSKFLTTRPDDQSDTWMPSQLQKAGYNVYSIGKFLNGFAVGPGSVCPRGFTVLDALVDPYVYSYFGPGFSKNCGTVQKYGDSDYSTDVIRDKAIGYLREAVAAGQPFYMQVNPIAPHERCKDSEEGGGGRLACDNAIPAPRHAYLFRNASLPRSANWMTPLPESFRAAVAASTDSVRSGKELGAVQSSLQLNTAYRQRLRAMASVDEMLGDIVQELSAQGVLDSTHIIFTSDNGYHMGNHNFGQGKTLPYEEDVRVPFFIRGPGLPR…
>CRv4_Au5.s10.g257.t1
MPRLTFGRDIVASKPCAALGLRRAPACPRVAPGRAEQQPRKHLEPVHVAQAPLSSSTTTNGTHSAPAPVASTSSRDASEAAAASALSANLLLICPDQKGVIAAVSQLLYGFGCNIVASDQFTDSSSGMFFQRITFDFSEIVIGPGNTAVLERAIAELANRFNMKWKIAYKNKVKRMAVLVSKQDHCLYDLLIRLRSGELRCEIPFIISNHPDLKHIADTFNVPFVHLPLDKNNKEAQEEALEKLIKEEKIDVVILARYMQIFTQGFCERHWEHTINIHHSFLPAFEGARPYHRAHERGVKIIGATAHFATAELDAGPIIDQAVARITHRDNVEDMIRKGRDLERMVLARAVRWHLDDRVMVYNNKTVVFED
>CRv4_Au5.s10.g284.t1
MQRREARVGALWILAVVLLLAAGAEAQRKRPPPAPPAPKGAKQNRKRPPPPLAQQSEDSPPPASPSPPRPPTAPFTQPNFLVLLVDDQDYLLNSTDRKYMPKLHKYIGDQGLHLNNFIVTSSLCCPSRVSLLTGRLTHNHNVTSNQAPQGGWKKFQSLNLDKNWLPLKLKPLGYNTYFTGKFINLFDVPVGDTKNCPKGWDMFDPLTDKTVYDYINYDFTPQCARTDSFTNAYQTDTVSQRASNYIDDAVSKGKPFYLQVNPAACHTACPKGAEEGGSCVPPVPSPKYDGVWSGLKVPRLANFDVPLPNALGIGNDVKGVDKHYQRRVETMMSVDDMIESLVTKLETLGVLDNTYVIYMSDNGYHLGNHGLAKGKTLPYEEDIRVPFYMRGPGIPAGVV…
>CRv4_Au5.s10.g308.t1
MHSSLLGAPVRGFTPFKKHKQGVQARVVLPRAAQPLRLAGVVANAGASGSRNLVRASAAAPAATTAAPASAAAVATTPSNGAAPARSGLVKDAPSFQEAITKLQEYWASVGCAIWLPHNTEVGAGTMNPATFLRVLGPEPWNVAYPEPSIRPDDSRYGDNPNRLQRHTQFQVILKPDPGNAQELYLGSLEALGIDTKSHDVRFVEDNWESPVLGAWGLGWEVWLDGMEVTQFTYFQQAGGRVLDAPAVEITYGLERILMALQGVTNFKDIRYAPGGVTYGEMFYQNEYEMSCYNLDEADVAGQRARFDLYDKEARRLLAKRLPIPAYDHLLKLSHTFNLMDARGAVGVTERAECFAVLRGLAREITGLWVSRREELEHPLGLIPPPAVPSPQRPAPPAS…
>CRv4_Au5.s10.g312.t1
MTVTMDDVRGKVDEMTGKRSMKELLIGTYDMKYLCKPVFPYFRKSKGVPPPMFFGKDDFLGLFVALVMGLQHALAMVGGLITPPLLISNLGFGTRPGTNPPVPYSSGNPAEVQRYLVQASLIVCGIMTFFQVLGVRIWKTNFQFGAGILSCMGVSFTTVPIATSVIGQLMKEKGHTFEEAYGMFLGTIAMCAVIPALLSFFPIRIIKKIFPPIVCGITIMMIGVHLIGAGFKNWGGGAFCADNWQHPPATKPCFLPANYPNGTSYMQANQCWVGPGIKCGDATKTEVFLPFGSQEYLGLGFLVFVTIIVLEIFGSPFMRNASVILALLFGYFIAAVTNYQGKKYVITTKIDQAPGITFLWTTTFPLGFYPPAIIPLMIVFIITSIETVGDTAATLEASR…
>CRv4_Au5.s10.g313.t1
MTVTMDDVRGKVDEMTGKRSMKELLIGTYDMKYLCKPVFPYFRKSKGVPPPMFFGKDDFLGLFVALVMGLQHALAMVGGLITPPLLISNLGFGTRPGTNPPVPYSSGNPAEVQRYLVQASLIVCGIMTFFQVLGVRIWKTNFQFGAGILSCMGVSFTTVPIATSVIGQLMKEKGHTFEEAYGMFLGTIAMCAVIPALLSFFPIRIIKKIFPPIVCGITIMMIGVHLIGAGFKNWGGGAFCADNWQHPPATKPCFLPANYPNGTSYMQANQCWVGPGIKCGDATKTEVFLPFGSQEYLGLGFLVFVTIIVLEIFGSPFMRNASVILALLFGYFIAAVTNYQGKKYVITTKIDQAPGITFLWTTTFPLGFYPPAIIPLMIVFIITSIETVGDTAATLEASR…
>CRv4_Au5.s10.g320.t1
MKLIHKVEEKMKKGETFFSFEFFPPRTEEGVENLFERLDRMVAYGPVFCDITWGAGGSTADVTLDIATRMQNLICVETMMHLTCTNMPEEKLESALHEVKKMGVQNILALRGDPPKGQEKFEAVEGGFNCALDLVKYIRKQHGDYFGICVAGYPEAHPDGIVDDPEQMKKNYWADIAYLKQKVDAGGDMIVTQLFYDVDVFLQFVKDCRSVGITCPILPGIMPIMTYGGFKRMTGFCKTKVPAEISDALEAIKDNDEAVKAYGIDLGVRMCRQLLASGEVPGVHMYTLNLEKSAVAILEQLGLVDTSRVQRPLPWRHVPAGTARAVEQVRPVFWSNRPKAYVKRTQDWDSYPAGRWGNTRSPAYGALSDHQFMRRHSTGEARREKARAAWGAAPASVDD…
>CRv4_Au5.s10.g337.t1
MLPILGRNAAGSALARLAGLRWAAAASQSSRDYSSTLMTADKLGPGGRSSVSGITATVFGANGFLGSYIVNELAKRGSQVVCPFRSTENEAMHLKQMGDLGQIVLLPELDIRNDDDIKRAISRSNVIINCVGMRLQTKNWSFEDVHVDFPKRLAKLAAETGQVQRLIHFSDMGADENHKSLRMRTKAVGDKEVLDAFPDATIVRPGDIVGIEDHFYNYLIYQLTLTVFAPVVESGSNKIQPTYVLDVADAVAALLRKPDTAGKTLYLGGPEVLTMREVYDLLLKTLRIYRDDTVHLPAWAVKAMYKPFDSVRRMLPGLPMTSPLATEDYVEEMLRDKVVPAGALGYADLGIVPQKVTDGLAIEPVRHARVGGYRWGDMSAVAKDIPESVRKYYNIKQ
>CRv4_Au5.s10.g343.t1
MQLLNSKSRVLSGSRQQAAAKAVRVAPSGRRSAVRVSAAVHLDFNTKVFQKEHAKFGPTEEYIVRGGRDKYPLLKEAFKGIKKVSVIGWGSQAPAQAQNLRDSIAEAGMDIKVAIGLRPDSPSWAEAEACGFSKTDGTLGEVFEQISSSDFVILLISDAAQAKLYPRILAAMKPGATLGLSHGFLLGVMRNDGVDFRKDINVVLVAPKGMGPSVRRLYEQGKSVNGAGINCSFAIQQDATGQAADIAIGWAIGVGAPFAFPTTLESEYKSDIYGERCVLLGAVHGIVEALFRRYTRQGMSDEEAFKQSVESITGPISRTISTKGMLSVYNSFNEADKKIFEQAYSASYKPALDICFEIYEDVASGNEIKSVVQAVQRFDRFPMGKIDQTYMWKVGQKVR…
>CRv4_Au5.s10.g346.t1
MVRGATLRARPATFARGLSSAAAPQPHSSNSQQPPRPHHSAGAGGPRRTASPALRARLVSLLGAGRVTEARDALTQHGTDESYHTPLPPDVVVYPESTEEVAAVVAACAAERTPVIPYGAGTSIEGHVGALQGGVCVDLRRMNRVLAVAVEDMDCRVQAGVTRQQLNQHLHDTGLFFPVDPGADATLGGMAATRASGTNAVRYGTMRDAVIGLTAVLADGRVVRTGRRCRKSSAGYDLTALLVGSEGTLGVITEVALRLHPVPEAVAAAVVTFPPPAPGGGGGGDGSGGGGGGLRGAVECVAALMACGVPVARVELLDELSIQAVNKYSGTAFAAAPTLFFEFHGSAAAVAEQAELVGALAREHGGSGWEWATSPEDRARGFPTDVCVPISRLTECVME…
>CRv4_Au5.s10.g351.t1
MPRRLAVLATCNLNQWAMDFEGNLGRIKQSIREAKAKGATYRVGPELEVPGYGCEDHFLELDTVTHSWEVLAALLADPEGLTDGILVDVGMPVIHRGVMYNCRVFLLNRRVLLIRPKLHLANDGNYRETRYFATWKHRGKVECHRLPDCVARAVAAAAAATTASADGGQAAAAAAAAAAPPPPVDVPFGDAVLKLRDALLAAETCEELFTPQAPHIDLALAGVEIISNGSGSHHQLRKLNQRLDLIRGATAKAGGVYLYANQRGCDGGRLYFDGCACVAVNGQLVAQGGQFGLAEVECVAACVDLDEVVSYRCSISSLREQASSTTPPAMVDVDFSLCRPPPGAAQPAHPSPPISPKVLQPQEEIAYGPACWLWDYLRRCGASGFLIPLSGGADSSAVC…
>CRv4_Au5.s10.g369.t1
MRVVGLTGGIATGKSTVSRELSVQGITVIDCDKLAHAATSKGSWGWKRVVQAFGRDILTAEGDIDRERLGGLVFNDAAARRRLNAATHLPVALSLARALLLSWLSCKWVVVVDMPLLFETKSHKLTRPNVLVACSPEQQLGRLLARDGGSVERAQARIAAQMPLDAKKRLADIVVENDGSVEQLKAQVRRLSERLRRGSLLWGVLTSPLAVMALVAAVALRLR
>CRv4_Au5.s10.g373.t1
MSMPMQRPMAGGARAGQVQRSSAALRSVASQVPFTAHRANFSSKRVLRQDARVEAPSRVVVVRAEQADLTGLTPGHPYPWEEDFDLLGDKVKEVTDQLLPDLRGCNIWLVGMMGSGKSTVGKMLANTLKYAFFDTDSVIELAHDKKPVSQIFAEEGQDYFRQCESQIIKELSPYRNLVISTGGGAVLKPQNWGYMHLGIVAWLNGDTELLARRVAKDGIEKRPLLAADAPEGADMQQVAKTKLDALLEDRRKYYENADVVVTLEGYGKDLEDGAPTAAVMYRLLTAINDKVQAKKREQAERMNFTIEGADQLKTMRTMDSPAGGLQLDGNQAP
>CRv4_Au5.s10.g376.t1
MPRPRILISNDDGINAPGIKALVAELVKADFADVYVCAPSGERSAQSHAITLGRYLSCVPTEPTTAGVVESYAVDGTPADSVMLALCSPVFQDVSFDLMISGINRGDNAGLHVIYSGTVGAAREAACKGIPAMALSLDNHLARKTDDYAVSASLAVALAKAALGVLPGQEAGGRAPAASLKGVVINVNFPIAQGQMLQGLFLARQSLACVFPAFKEVTEAPGPHLAEIDEHTPNSRVFRNYAGMVQEDQEEGNDAYALKNGWVAVTPLSLLSHIQLGQDPRAENVVNAVSQIVTRAAAEAGLSTGGIPAKL
>CRv4_Au5.s10.g404.t1
MRPASGGSGAAGPAAPAAGAAPAVSDVPGRWVPQHHRDITLGRLDGFLAAGQFADVNLRAAMWRRRSADAVSLEVYSHPKDVPYPPYDVAIKMPYRPAAVGEAFGPSWTTHWFRVRARTPADWEGEGPLMFRWDSGSEAMLYLDGPTPRQGITDQRNEYLLAPAAVAGQELVFYVEMAANGMFGNTTDGILPPNEDRYFTLKAAELAVPDVEVTGLYHDLRALTGLARELPAGHATGEAALYTANKIVNTYRRGDPQSVAACRALAASVLAVRDPGDRMQVHAVGHCHIDTAWLWPFSETHRKTARSWSSQLRLAERYPWHVFTASSAQQYEWLLQDYPGLFTEIQAAAARGSFVPVGGTWVEMDTNVPSGESLVRQFLFGQRFFQRHFGAPCDVFWLP…
>CRv4_Au5.s10.g406.t1
MNWLGGSDTGFGAVPPLPTRRVVVTGMGLVTPLGVGVAETWRRLLAGECGLRQLQQEDLPESQRSALSSLPCRVAGLVPEEQFQEAVRRLGLAEESRRSSRFMLLALLAAEEALADARWGPGAAVTISSGAQEGRGASGTSSGGGSGIGNGGWSDAAARRTGVVVGNGMSCTTEVAEAGALVCGGKQRRVSPFFVPRILPNMAAGAISIRYGLQGPNQAPSTACATGGHALGDAFRIIQRGEAEVMVAGASEACVDAISFTGFSRLKALSTRYNDNPTQASRPFDADRDGFVMGEGAGVLVLEELGHARARGATIYGEVRGYGLSGDGHHVTHPHPDGAGALLCMRRALVGSGVGLDDLAYINAHATSTPAGDAIEQAAIRQLLLKPLHRNGGEAERSA…
>CRv4_Au5.s10.g407.t1
MKKATDRDKLEAFQQYDAWVFDLDGTLWKGSTLIPGAKEFIELLRYYNKKVFFVTNNATKSRATNAAKLTAMGINATQAEMYTSSFAAAAYLKAISFNKKAYVIGEEGLVEELTAVGVQCVGGPAHRGVEVDWSQAEPHVEVDPEVGAVVVGLDRYISYYKLQYATLCLANNDSCMFLACNTDARGHFSQAQEWAGAGTMVAALIGSSEREPMLLGKPASFILDHLCATHQVARDKTIVVGDRLDTDILWGIQNGAGTCCVLSGVTSEAQLLAESNKVHPKLYMSDIGDFLTIKNQIPSNCAIM
>CRv4_Au5.s10.g452.t1
MQCLSSRTSAAVRSGARPMQAVAPRPVRNVACDAASLQFIKGVAEPTVPEVRLTRSRTGANGTAIFVFENPSIFQASGEMGDITGLFMVDDEGTLSTTDVKAKFINGKPQAIEAKFNMRSQFEWDRFMRFMDRYAAENDLGFEK
>CRv4_Au5.s10.g494.t1
MSAVEVHHTEKRSFKELMVGTYDLKYLCLPAFPYFRKGKGVPPPRFFGKDDFLGLFVALVMGLQHALAMVGGLITPPLLVSTLAFGNRPGTTTPYAQGDPAEIQRYLVQAALIVCGIMTFFQVLGVRIYKTKFQYGAGVLSCMGISFTTVPIATSVIGQLMKEQGRTFEEAYGNFLGTIAMCGVIPVILSFFPIRVIKKIFPPLVCGIVIMMIGVHLIGSGFKNWGGGAFCADNWQHPPATRACFLPAKYPNGTSYLQLNQCWVGPGVMCGDKTKTEVFLPFGSQEYLGLGFLVFITIIFLEIFGSPFMRNASVILALLFGYLIAAVTTYQGKKYVITTKIDQAPGITFLWTTTFPLGFYPPAIIPLMIVFIITSIETVGDTSATMEASRMAVDTEDGT…
>CRv4_Au5.s10.g498.t1
MVADNDHVEPAECSTAAGLIVALVMGLQHALAMVGGLITPPLLISNLGFGTRPGTSPPVPYSSGNPAETQRYLVQASLIVTGIMTFFQVLGVRIWKTDFQFGAGILSCMGVSFTTVPIATSVIGQLMKEKGHTFEEAYGMFLGTIVMCAIIPVILSFFPIRIIKKIFPPIVCGITIMMIGVHLIGAGFKNWGGGAFCADNWQHPPAPTTCFLPAKYPNGTSYLQQSTVCWVGPGIKCGDATKTEVFLPFGSQEYLGLGFLVFVTIIFLEIFGSPFMRNASVILALLFGYLIAAVTTYQGKKYVITTKIDQAPGITFLWTTTFPLGFYSPAIIPLMIVFIITSIETVGDTAATMEASRMLVNTEDGTRRIKGALLNDGISGIFSALATSLPLTTFAQNNG…
>CRv4_Au5.s10.g498.t2
MVADNDHVEPAECSTAAGLIVALVMGLQHALAMVGGLITPPLLISNLGFGTRPGTSPPVPYSSGNPAETQRYLVQASLIVTGIMTFFQVLGVRIWKTDFQFGAGILSCMGVSFTTVPIATSVIGQLMKEKGHTFEEAYGMFLGTIVMCAIIPVILSFFPIRIIKKIFPPIVCGITIMMIGVHLIGAGFKNWGGGAFCADNWQHPPAPTTCFLPAKYPNGTSYLQQSTVCWVGPGIKCGDATKTEVFLPFGSQEYLGLGFLVFVTIIFLEIFGSPFMRNASVILALLFGYLIAAVTTYQGKKYVITTKIDQAPGITFLWTTTFPLGFYSPAIIPLMIVFIITSIETVGDTAATMEASRMLVNTEDGTRRIKGALLNDGISGIFSALATSLPLTTFAQNNG…
>CRv4_Au5.s10.g503.t1
MKTSFFVVAAVALYLGQLALAAQRNPRTDEDILPGWMGTDFKPDVVQPDLISHRLGKMKVLDADARIFLIEHFLTDEEADHIVQVSERRLERSGVVATNGGSEESQIRTSFGVFLERGEDPVVKGVEERISALTLMPVGNGEGLQVLRYQKEQKYDAHWDYFFHKDGIANGGNRYATVLMYLVDTEEGGETVFPNIAAPGGENVGFSECARYHLAAKPKKGTAILFHSIKPTGELERKSLHTACPVIKGIKWSAAKWIHVGHYAMGNEQAEMIEQHPQPKVKPQNLPPGCEDSDEMCPDWAEAGECERNASFMIGTRARPGKCVASCKRCDVVVDTGAERTQSEWKKSQTGSRRSLGA
>CRv4_Au5.s10.g535.t1
MQLGKFHHVQAGGVAQRPRRGALPRSVVTAAAPGEKLSALELLRRENELLRQTLDVANVPVDSVVEPRASSTATAPRPTAPKSAGSSLTNASGAELALLGEAGAVAGPEDFWSPTVEVPENMEYVDEYGPISPIPNHDGTMCFKWDNTLWSAAEHFKYRWNVFKNIRAAIDQNEGGFEKFSQGYKYYGFNRGECNGQTGIWYREWAPGAKALALVGDFNNWAPAEGHWAFKNQYGTWELFLPDKPDGTSAIPHRTKVKARIEGADGSWQDKIPAWIKWSTQEWNEVLFNGVYWDPPEKGAPGEVDPDKQYTFKYPRPPKPRALRIYECHVGMSSEEPKVNSYLEFRRDVLPRIRALGYNAIQIMAIQEHAYYGSFGYHVTNFFGVSSRCGTPEELKALV…
>CRv4_Au5.s10.g542.t1
MAAIGWPGIVAIISVAISFIIMAADWVGPDITFTILLSWLTAFDGKIITVAKAAAGYGNTGLLTVIFLYWVAEGVTQTGGLELVMNYVLGRSRSVHWALVRSMFPVMVLSAFLNNTPCVTFMIPILMSWARRCGVPPKKLLIPLSYAAVLGGTCTSIGTSTNLVIVGMQDTRYNKQNKEDEAKFGMFDIAPYGVPYALMGFVFIILTQRFLLPGNSSRYAKDLLIAVRVLPSSPVVKKKLKDSGLRTQTGFSLAGLWRGGAMTRQVDPDTVLEANDILYCAGELDVVEFVGEEFGLGLVTAETERALTDGQAVGDSEATAFHDTGASPYKKLVQVTMTKTADLVGRTVREVSWQGRFGLIPVAIQRGNGREDGRLNDVVLAAGDVLILDTTPHFDEARD…
>CRv4_Au5.s10.g542.t2
MRLVGPDITFTILLSWLTAFDGKIITVAKAAAGYGNTGLLTVIFLYWVAEGVTQTGGLELVMNYVLGRSRSVHWALVRSMFPVMVLSAFLNNTPCVTFMIPILMSWARRCGVPPKKLLIPLSYAAVLGGTCTSIGTSTNLVIVGMQDTRYNKQNKEDEAKFGMFDIAPYGVPYALMGFVFIILTQRFLLPGNSSRYAKDLLIAVRVLPSSPVVKKKLKDSGLRTQTGFSLAGLWRGGAMTRQVDPDTVLEANDILYCAGELDVVEFVGEEFGLGLVTAETERALTDGQAVGDSEATAFHDTGASPYKKLVQVTMTKTADLVGRTVREVSWQGRFGLIPVAIQRGNGREDGRLNDVVLAAGDVLILDTTPHFDEARDDFKINFEKLRFVKDGAAKEFVIG…
>CRv4_Au5.s10.g563.t1
MALLANSRSLRGANPSAVRATAARVARLAVVPRRGVATAAQKQQFESFDDMLARSELPLLVDFYATWCGPCQMMSPILTAVQTKMKGKLQVVKIDTDKYPGIASQHRIQALPTIALFMKGKMVFRFEGVLNEGQIIDKVNYYLSGAAMGQQK
>CRv4_Au5.s10.g610.t1
MWTARVASEPYLWPYDGNLRPDNTALLVIDMQVDFCGKGGYVDLMGYDLSLTQAPIEPIRQAVKWLRALAACREYGYLVIHTREGHRADLSDLPANKEWRSKQIGAGIGQPGPAGRVLVRGEAGWGLIPELAPLPGEPVIDKPGKGSFYATDLDLLLRRGGVRNLVLCGITTDVCVHTTMRDANDRGYECLLLSDATGATDPKNHAAALEMVKKQGGVFGAVADVAAFVSAVTPPVRKMLAAEADASAADGAVANGHANGNGAAPEEVASAEPAVAVLPDAVPYPYSFPVGRSALVMIDFQRDFMEAGGFGASLGNDVERLRACLPGAAALLASCRAAGMHVVHTLEAHKPDLTDLHPAKFTRGNLPAGMRIGDVLSGDMGRILIRNEPGNGIVPEVAP…
>CRv4_Au5.s10.g647.t1
MLSRALLLAGRLAATGQQQAASTSSRAVQPLGSLLQRCNFATNSTDIFNIHKDTPENNAATSFEFSEATLKVVNDIIARYPPNYKQSAIIPVLDVTQQENGGWLSLAAMNRVAKLLDMAPIRVYEVATFYTMFNRTKIGKYHVQICGTTPCRLQGSQKIEEAITKHLGIGIGQTTQDGLFTLGEMECMGACVNAPMVAIADYTKGVSGFEYIYYEDLTPKDIVNILDTIKKGGKPKPGSQYRLKAEPAGAVHGGEKWVPKDGETTLTGAPRAPYCRDLNATA
>CRv4_Au5.s10.g679.t1
MQVQQKLGASRAMKASRNVQRVFAAHSDIRKEAALRVPLDKAHTFNAKFVPFADVQSNKMSPETYSLDDIVYRSRDGGLLDVHHDMKALAQYGPDYWRALFDARVGTTAWPFGSGVWSKKEWVLPGLSDDDIVSMFEGNSNLFWAERFGREALGMTDLWVKQCGNSHTGSFKDLGMTVLVSQVNRIRKLKPGSITAVGCASTGDTSAALSAYCAAAGIPSIVFLPADKISLAQLVQPIANGALVLSIDTDFDGCMRLIKQVTAETPIYLANSMNSLRLEGQKTAAIEILQQFDWQVPDWVIIPGGNLGNIYAFYKGFKMCKELGLVDKMPRLVCAQAQNANPLYQAFSKAQGSNAAIKESYEPMKAKMTFASAIQIGDPVSIDRAIMALKDTNGIVEEA…
>CRv4_Au5.s10.g680.t1
MRKEATRLVSALLRAGNNGVSTSWAVGGTRLKSAMPQPDEKKDEDLHAKEGKVLHPHLLNENVVKTQYAVRGELYLRAEQLRKEGKEIIFTNVGNPHALGAKPLTFTRQVLALCAAPFLLDHPKVEDMFPADAIARAKKILASFKGGVGAYTDSRGNPLVREEVARFIEKRDGVPSNPDHIFLTDGASVAVRLCLNAMIRHDRDSVLVPIPQYPLYSASIRLYGGTLVGYFLDERRGWGLSVEELQRALQEAREEGKLVRGLVFINPGNPTGQCLSKENLQELIKFAYQEKIVLMADEVYQENVYQDERPFVSAKKVMWEMGEPYRSHVELLSFHTVSKGTAGECGLRGGYVEMTNIHPGAIEEVYKCASINLSPNTMGQIALSVLVNPPKPGDPSYDQ…
>CRv4_Au5.s10.g682.t1
MAFVLAKSSAFGVAAKPVSRRSSVAVKASAVPENVKEAREWIDAWKSKSGGAKRDAALPSWMPGADLPGYLNGTLPGDFGFDPLYLGQDPVKLKWYAQAELMNARFAMLAVAGILVPELLSNIGFSWPGAGVAWYDAGKFEYFAPASSLFGVQMLLFAWVEIRRYQDFVKPGSANQDPIFTNNKLPDGNEPGYPGGIFDPFGWSKGDIKSLKLKEIKNGRLAMLAFAGFIGQAYTTGTTPLKNLSTHLADPWSTTVWQNDLARL
>CRv4_Au5.s10.g683.t1
MAALRMSAPTSAALRSSVRSAKPVLPVRRAVRSVVVRAQASEEQLGFKVGTVATLSSVAASWMMAGNAQAATELASLAASDNRAGILATLLVPVLGWVGFNIFGSLQAQLNQMDAKNKRAVPAAVGMGAAASLLFAQSAEASTEIATLAASDNRVAILATLLVPVIGWVGFNIFGSLQAQLNQMDAKNKRAVPAAVGMGAAASLLFAQSAEASTEIATLAASDNRVAILATLLVPVIGWVGFNIFGSLQAQLNQMDAKNKRAVPAAVGMGAAASLLFAQSAEASTEIATLAASDNRVAILATLLVPVIGWVGFNIFGSLQAQLNQMDAKNKRAVPAAVGMGAAASLLFAQSAEASTEIATLAASDNRVAILATLLVPVIGWVGFNIFGSLQAQLRQMDA…
>CRv4_Au5.s10.g712.t1
MCRPTDSDSGPALPSIPHQYWIIHGATYDLASYIKSHPGGDEAILLGRGRDCTELFEQYHVLNNKHLRVLERFRVTLPAAKVATNNLKEDMVSTISAFEGEEADAAAVVGIQQPAAPARVAHQSDPFYEDIKAMVRAHGNTKMSAPFVILHCLHVVGLIWSMKLWWQGAFISAFILPYFLWVLCAAMVHDGGHFAHSKRPLVNKLLTHTGALFTNSVGCWYLQHNILHHSYTNLVGKDGDLDSHHPYMRIHPEQSMLPANIHHAVRFFSHLIMYNFAHIGLTMISPLSYFRGVAAQKKGTADAKQAQDAQTVAQYHSTVMLQLVTVGAFYITPFLRFDFSRALLLTLLPTFMMSVAFMVIAQVSHIQMDAEAPSADLEKLHWARRMALTSVDYSQESTL…
>CRv4_Au5.s10.g767.t1
MKTCRSWPGRAGRSGTARLRRVVRHCIEHEPLLLATLAGVAVGVILGTALSFANLSPTALEVIGLPGDLLMRTLKMLVLPLITASVMAGVCALRQSTADMGKVARYTLLYYFSTTMGAVVLGIAIVNIVRPGRGSPFDQLDSGEGSCHAANQKTVASHAASTGQHSPVEAFLGVIKSAFPDNVFAAAVNMNVLGIITVSLLMGAALSSMGPEAVPMITIINIFNDAIGKIVNWVIWTSPIGIASLITTSICKACNLAATLEALGLFILAVLMGLLLWGFIILPAIYYATTRRNPGQVYRGFSQAMATAFGTDSSNATLPITMRCATEGLGCDPRIVQFFLPLGTTVNMNGTALYEAVTVIFIAQAHGVVLGAAGTVIVALTATLAAVGAAGIPSAGLVT…
>CRv4_Au5.s10.g774.t1
MATPVTTIYVKGDPAKNKLLDCPFCHRVLLAYEAKKLPYKMEYIDFDNKPAWLLEASGGKVPVIKEGPDAPYMPDSDVIVVHLEKQHPEPSLQSSVPAEIGAKLFPNFRAILIGPAAEVADKVAALEEQLAGMDDYLRQHEAQGPLFGGQHLNGTDCSLAPKLYHAVVALKHFKGWELPARFTALHKYLAALKALPEWQHVDYGTEAIIAGWERHIKHAAAGTGHH
>CRv4_Au5.s10.g777.t1
MLASELPATGLQYPRANDELVRSAAFVQRYGSVVAPPQMDWRSVPGVISPPADQNPCGACFAFAAAHAIEARVAISKGDAASSVRLAEMQAVVCAQDGNGCKGGWVGQAYRYAATSGLVPKAAWAEMTGNAYVESQYCPSRRLADYIRKVDVADPAAVASGGSSSGSGTTTAKIAGWETAPRTAMALMKVLANQPAVALVHAAPDWSDYRGGMYRGDCSAAADDANHAVVVVGYTADAWIVKNSWGAGWGAGGFMLLPRTGNSTNKCGVLNSVTYPVLDKVSPERRGELLRQGFCRAAGKVSLADVAAGNVSLAALAVRFGVPLNEMIRVNSHVQVGVDTPLELMTNYYIPPCTKEVPPQPVPKASCGTTYRIDAVADSDSDAVVRMLNAFEGAGEAGR…
>CRv4_Au5.s10.g799.t1
MYSFAQRADAEVLDEPLYASYLTLTGLPRPYRDFVLAEQSTDGNAVVKDQLLAPRSRPVLYAKHMGKHKLGITGELFKRAQHMALLEIVSEMRVQGRAPIVINSDELIRQPEGVLRALCAALGLAWDPAMLSWAAGPKPYDGCWASWWYRNTHKSVGFDMEVRDARKPLPPSLKPLLAECYPLYDTLSRLALRPCMQGQGPEGPVPRPLPAAGGGDAEQSGTQPQADATTPSAGAPELEAPAPAGLQKTGTHVYVQDPRNEDVLIGIRDGVTERFELVWRPHARVSVLDSGYMLGDGVWEGIRLHNGVLLLAEEHLERLAEGAKALDMELGLGAPGAGLAEQLGALQQMLYDTVDANGMTSGVHIRLMVTRGLKPTPYQNPNTTIGKPTIVIVPEYKEA…
>CRv4_Au5.s10.g807.t1
MQLAAQRQSARVASRSERTFAPVLMPVIAPACPILRGRAVATSSAPVARKRSALRGAVIAKAATVDAPRKFQQPGQGVKQVNVVYKFGGSSVRDAERMREVADIICSFPQYLPCVVLSAMGKTTNMLLECGELALKTPTDQIGDLAPLKNIRKLHLDTCDELGVEAAVRTEVDRMVNELQQLLIGISIMQDLTPRAKDSLVSFGERLSTRIFASYMRVNGVAARQHDAWELGMTTTDDFTNADVIYEASLPAIKKALAPAPGTAQPEVPIVTGFLGRGQNTGAVTTLGRGGSDLTATVLGAALELPEVQVWKDVDGVLTSDPRIVPSTKPVNELTFEEATELAYFGAQVLHPQAMQPAIRSGKMNVRVKNSYNRTAPGTIISATRPMDCTVVTSIVLKS…
>CRv4_Au5.s10.g816.t1
MVTNDVRPLQTAGPAEPPVYATVLTPKGKFLHDLFISRHPDMPDALLLEVDAAGATAAMQLLNNTASWRRGAQPEQLAAEPEQGVEQEQEQEQEQEVEVEVAAALRHGLGYRALVPAADVAAAAAAAGGAAGEEAYRAWRYSLGVAEGEAEIPAGQAAPLDFNVDVLRGVSYTKGCYVGQERNSFTHYRGVIRK
>CRv4_Au5.s10.g819.t1
MGNEGEVKVAVNGTSIEEVNFEKIDLKEALSILNTTPHGLSSAEADKRLAEYGPNRLPESKRIPLLVFLGYMWNPLSWAMEAAAIIAIALLDYADFALIVGLLFLNAVISYVEESSADNAIKALAGALAPKCKVIRDGTLQTMEAVNLVPGDVVVMKFGDIVAADVKLFSDDPQHPFDSHSEEVPMQIDQAALTGESLPAKKHTGDVAFSGSAIKAGERHAVVYATGINTFFGRAAALISGTHNVANLQIIMTKIGGVCLVTIGVWVVIELAVQFGHYGHGCTSGEEGCPTLTNMLVILVGGIPIAMPTVLSVTLALGAAKLAKEGAIVARMSAVEEMAGMDILCSDKTGTLTLNKLSIDMNTIYKCEPGITNDDVAKYGALSADVAGEEPIDMVLFNN…
>CRv4_Au5.s10.g832.t1
MQDRYGAEPWIETISWSPRAFIYHNFLSEAECDHLTDIGNKRVSRSLVVDSKTGQSKLDDIRTSYGAAFGRGEDPVIAAVEERIAEWTHLPPEYGEPMQILRYVDGQKYDAHWDWFDDPVHHAAYLHEGNRYATVLLYLSGVEGGGETNLPLADPIDKEAQTLPDASPCGAKYGISVKPRKGDALLFFDMDIEGGKGDRKALHASCPTLKGMKWTATKWIHNKPYMGKYDPLRTAGRCADTGGNCAARAAAGECTSNMDKMVGPAGECRKSCNDCVDCPAGDILCARRNMRSLVRTRAAAAAAAASRSSS
>CRv4_Au5.s10.g840.t1
MDEARATNVFLVRHGQTDWNAEMRLQGQLDPPLNSLGVEQAEEVAAALADRPLDAVYSSDLTRAVQTARAVAGRRPGGQTLEVRTSPQLRERSLGVLQGLTIAEAAVQQPEALRLLRSHDPATSVPGGESPGAMRQRVVADIERICEQHRGQSILIVAHGGVLHHVYAHVCGHSYGGPITNASVHHIKVQPPKWALVQWNMGTDTASGDGGGGPHAAFGGGANEG
>CRv4_Au5.s10.g868.t1
MRAAAPKGVRAGVKQQLGSGQDDMVAPSKHTEATANVKGVKRAADKPADPAPNVAAEKADAPPAPAPAPAPEPAGPVKKKQKVSEKAAASAATATTAVGDVPDAAAEPGAAKASKPRKEKAASTDAGAAASGAAAGKAAGKETGKRLKKEKTDNKKQAAKAMDEEAEGEGSDVQEEQEGSGADGAGAAGEAAGEVEVKVEGRASRKAAQKVKSYKEAKEVESDGNSDGDDDMVDVVEETKVATEDEALKQTAGSGPGAGAGSATGGVMRSLVEWDFTDSEGRPEPIERLGKVEGGLYISGCIYPALGYDLDKAGRPKAARGKGAAAKGAAAAAAGVKALGRRVERVGPVSSWRVAYSPKADPMVIVHTAAAQYVCGKPAAGAARGFMAQLEPQLGLADL…
>CRv4_Au5.s10.g896.t1
MCAREQAVRELDQHQDTRVIVVAAQGANFCAGIDVGYLQRNFLACPGTQRAAMRRNILVLQAAYTALEEAACPVLAAVHGRCIGGGVDLVTACDVRLCSADATFCVKEVDLAIPADLGTLQRLPHIVGHAAAMDLALTARTVGAAEAHRLGLVSSVAAPPEGEDEKAAAGGGGGGGDGRAAVQAAALKLAAAIAAKPRLAVQGTKRVLLHSRDSPRVSGGLDYVATWNSAQLLSDDLAAVLAAGAGGGAGGRGAGAGAGGGAAGKQARSKL
>CRv4_Au5.s10.g939.t1
MLALTTALALVGPPAAAAASGPSKPNPSTPGPLNARASDPMEPELAGLRRQLAETQAALDSIATRVGLMSPQAAATGPASGQPRSGPAPYTRTQLLSTLSAAATAPTSSAATAAAAAAASSAARELLGAEQQLRTEVGVALQRANHLRPDGGTRLPEAEAHYRVVLSAMVEAEQEVEVEAVAAEAAGAAGAAAEAAAGQRRQLHQARLVRLGVWGNLAALLLEADRPHEALEELRGALELAEANDLTDATTAHTDLPASPSLSPGPSSGPFSPQAGLGNLVCGLRFNAGKALAAVGRTADSEAAYAAAARGAVGLDPACFAKATAAMTRLPPDLAAHVRAAVAAAADSGLTARLIRAAARQARRAAAAAAGGAGTAAGATDEEEDEGDEEALQQTLAAA…
>CRv4_Au5.s10.g960.t2
MATLGQQRCGGVGAEARRARKAVLPVVCGKSLFSSRPRSPLHKQGVRHAAAVVTAPGPVSQRFAQVAGKVDFKGVHHVALLCSNLERALEFYQGILGLEINPERPHSKLPYRGAWLWIGPEMIHLMELPNPDPLTGRPEHGGRDRHFCVGVASIEPLVEKLEAAGVSYTKSMSGRAALFFRDPDMNCLECVEMESWR
>CRv4_Au5.s1.g981.t1
MQHTLMRANSYPAGAACSGRASQRRAQPVTVCSGASRTPQQGIAPMRGSSACGASGRLPAPFSSAAASRPTAAGRRGAVRVQANWGAPVEFQPAKVVSNSPAAAGPLHKVVIDVGAPLAAGYTVPGQFVQVKVGDSKPGFFAIASAPGAHAGSGQLEFLIKGAPGSTAELLCNASAGDPVSVSPVMGKGFALDRLPASTTRAVLLFATGSGISPLRAVIDSGALAGRDVTLYYGTRNPESTAYSELLPQWTAAGVKVVSVYSESKQGYVHDVFEREGLAALPADAASSVGAMLCGHKGMCQAVTALLTAKGVPPEKILLNF
>CRv4_Au5.s1.g987.t1
MTTSNASVKPSALETATVPHPLEQLSADEVRRAAEVVRRYAAGAGLGTLRFNTVMLREPPKRYQLAFERGAVPRPPRVAEVVLVLPQSAGVAEALVRLALPPAAAEAAPLGPPPPPASVAVWPAASASPSASSPSTPGAPFIGPDTVAPPCAELGAQLLLWRKLEGVHPLTSPDDNSEAEAIMKASPVLRQAVAERYGLSEAEIDEQLMCDTWACHNAPRHLAGRRLMQGFLYLKLRGGHDNEYAHPLDLTPIVDLNTREVVHMDAYDRPCSVHRGPDATGHNYSRSLVDTGVRPWRDDIKPLHVVQPEGPSFSLDGPVLSWQRWRMVLGFNGREGLVLHNLTYTDPLAPPGAPPPPGPGRVRPVLHRASLVEMAVPYGDPHVPYTRKCALDVGDYGFG…
>CRv4_Au5.s1.g1012.t1
MALEAGIMMVTIEYAKDLKDKDWFGKQDPYAVLKVGGQTFRTKTHTDGGKNPVWNETFAVNVINDNTADLTLYDSDVGKDDVIGTATVGLAKGSHYLQCPVKTKSGKQHGFLAVRLAFTRNSAMKGGHPPAHGAPAPGYPAPHGAPPPGAYPPPGAYPPPAGYPPAAPYGAPAGYPPPSGYPPAGYPPQAGYPPPAPHGYPPPAPHGYPPPAPHGYPPAGYPPPAAHGYPPAPAGYAVHVSGVPPPAAHYGHKMKHKGYKHKFKGYKHKGYKHKKHKGFKGFGFKF
>CRv4_Au5.s1.g1020.t1
MGRGVAWRGVRTPARSIQRISLYSYGAPRVGNKAFAEVFDRLVPDTWRITNANDIVPSVPRLMGYCHVGHAVRLGADGVLRVGRSTAEGVSTDVFGEGKAGMEVIQDIVSQVQDQSRPWDEVYEEIKEREMQLLNALVGGQGLEEHMETFYLASLQQAVQAAAAAGGAGGAGQQGAVKK
>CRv4_Au5.s1.g1022.t1
MDFKSISGEYDVSKKTLKTACKLKVADNISVKLKLANPGAKPGIEVEYKGFEATYDVKSKDFSIEKKFKLRAGELKIKQKVPGLRTELLPSPEVQWKSHIVKGRKFSWEVEPSYCFQARKAKLDQVIELNGGKEKLKLEFDSKLGVKGLVGTLTHKVGQSWAKQLSAKYSQAAGPSLIHEVEPSKKVSLKSTVGIKARDLKIVAEVKPGKVAGLKPKITLEGKVSAKAPTKPTGIVAGLHLDV
>CRv4_Au5.s1.g1056.t1
MCGILAVLNTTDDSQAMRSRVLALSRRQRHRGPDWSGMHQFGNNFLAHERLAIMDPASGDQPLFNEDRTIVVTVNGEIYNYKELRQQITDACPGKKFATNSDCEVISHLYELHGEKVASMLDGFFAFVVLDTRNNTFYAARDPIGITCMYIGWGRDGSVWLSSEMKCLKDDCTRFQQFPPGHFYNSKTGEFTRYYNPKYFLDFEAKPQRFPSAPYDPVALRQAFEQSVEKRMMSDVPFGVLLSGGLDSSLVASIAARKIKREGSVWGKLHSFCVGLPGSPDLKAGAQVAEFLGTDHHEFHFTVQEGIDAISEVIYHIETFDVTTIRASTPMFLMSRKIKALGVKMVLSGEGSDEVFGGYLYFHKAPNKEEFQSETVRKIQDLYKYDCLRANKSTMAWGV…
>CRv4_Au5.s1.g1060.t1
MSLQATMNAPCATGRVARRSVKVSAISAPPTPARAPSSTGSVKRAMTMTEKILANHSDNSAVKPGDNIWTKVDKLMTHDVCGPGTFGIFQKEFGPNAKVWDNERVVIIPDHYIFTSDARANRNVDILREVAGKYNIKYFYDITDRSNFKANPDYKGVCHVALAQEGHCKPGEVLFGTDSHTCNAGAFGQFATGVGNTDAGFILGTGKLLIKVPPTMRFIMDGEMPEYLLAKDLILQIIGEISVAGATYKAMEFAGSAIEGMNMDERMTICNMVVEAGGKNGVIAPDQTTFDYVKARTQEAFEPVYSDGAASYIADYKWDVSKLEPLVAAPHSPDNRKTARECSDVKIDRVYIGSCTGGKTEDFISAAKLFYRAKRQVKVPTYLVPATQKVWADVYTMPV…
>CRv4_Au5.s1.g1073.t1
MALREVSQKRVLPLLAQFTRGLSASAMPEQVSLDANAPISQPAPFSYVPPGRNHLFVPGPVNIHERVLRAMHVPGQNHRDPWFAEFYKECLEDTKHMYGTKAATPFIFPGTGTGGWEAALCNTLSPGDKVICFRYGLFSHLWIDMMQRLGLDVTVVDRPWGEGADEGALEELLRKDTGKKIKAVCVVHNETTTGVTSDIAGCRKAMDAAGHPALLLVDGVSSIGALEFKMDDWRVDVAVTGSQKAMSLPTGLAFVAASPKALEAMKSAKLKRVYYDFADMLRTNPSGNVPYTPCLSLLYGLRESIKMWKEEGGMEAVAARHHRLAEGVRQAVDGWGLKLLCKNPRWRSDSLTVVEVPEGVDSNKIVKNAYAKYDLSLGIGLASINGKVFRIGHLGNMNE…
>CRv4_Au5.s1.g1073.t2
MALREVSQKRVLPLLAQFTRGLSASAMPEQPAPFSYVPPGRNHLFVPGPVNIHERVLRAMHVPGQNHRDPWFAEFYKECLEDTKHMYGTKAATPFIFPGTGTGGWEAALCNTLSPGDKVICFRYGLFSHLWIDMMQRLGLDVTVVDRPWGEGADEGALEELLRKDTGKKIKAVCVVHNETTTGVTSDIAGCRKAMDAAGHPALLLVDGVSSIGALEFKMDDWRVDVAVTGSQKAMSLPTGLAFVAASPKALEAMKSAKLKRVYYDFADMLRTNPSGNVPYTPCLSLLYGLRESIKMWKEEGGMEAVAARHHRLAEGVRQAVDGWGLKLLCKNPRWRSDSLTVVEVPEGVDSNKIVKNAYAKYDLSLGIGLASINGKVFRIGHLGNMNELMLAGALVGAE…
>CRv4_Au5.s1.g1092.t1
MVVASASDAGPAPAATASGAAAAVTSTPKPADVVTVYFRQEGTSTTARPGEDFMDVASRCKADIPTGCLHGSCGVCEVELFKYQVDAESGEAREAGNPVVMRACVAKVPRGWGRVEVGMMAIDQVWGQDGWDT
>CRv4_Au5.s1.g1108.t1
MQAKMQTRAVSGRAAARSRVSTTKVVCRALNSMESPYAEELKKTAAYISQKGKGILASDESNATTGKRLESVGVENTEDNRRAWRELLYTAPGLGQYISGAIMFEETLYQKARDGRQFVDILLAQGIYPGIKVDTGLQILPGDKGETTTQGLDGLADRCKAYRKQGARFAKWRAVVKIGEAGCPSTTAVLENAHGLARYAQICQENGLVPIVEPEVTLGPGDYSIEETAFWSERVYSHTMRLLNEYGVVLEGILLKPNMCLPGLDAPVASPQLVAEVTTRTMMRSIPPAVPGIHFLSGGMSEEESTLNLQALNEACPNAPWALTFSYGRALQSSTLKTWAGKESNWAAAQDILLKLAKANSEASTGSFKGPHPVPGGGRILQALRTGGAGK
>CRv4_Au5.s1.g1126.t1
MQHRAHHSHGPQPLAAAAPEREALLSEQEQTERSPPASLLSRLNRLRKKPVVSLFQDLKSVKVMGLDPSPELVAISMVYFVQGILGLSRLAVSFFFKDELHIEPAEVCVCV
>CRv4_Au5.s1.g1160.t1
MLKTAKALGLAGQVAAKAMGGAAGATGGMGLVAANAQNMAGMASAASEATPKSLGYTMPGEFEPHVGCWMGWPYSPYLWRENAKPAQQQYAAIAKAISEFEPVWMFADPSSIQSARNHFRGVSGVTVVEMPIEDGWLRDWGPTCVVRDDPKTGKREVAGVHWDYDCYGAPGKKKLGLPAMMPEWQKDHAAGRAILDWAGLKAFECPLHLEGGSIHSDGQGTLVVTEECLLHPSRNPHLGKEGIERMLKEYLGLEKIIWLWKGMMGDDHVVNGHVDNMATFSEPGTILLSWCDDPNDPQHEVSARNLEILENTEDALGRRIKVIKLPAPTPGMFRSFKEANGMHPDHAKKGYVPRVAGERLAASYINHYIANGGIVCPQFGGAQSKSDELALEILSKAYP…
>CRv4_Au5.s1.g1191.t1
MAAMMQKSAFTGSAVSSKSGVRAKAARAVVDVRAEKKIRVAINGFGRIGRNFLRCWHGRQNTLLDVVAINDSGGVKQASHLLKYDSTLGTFAADVKIVDDSHISVDGKQIKIVSSRDPLQLPWKEMNIDLVIEGTGVFIDKVGAGKHIQAGASKVLITAPAKDKDIPTFVVGVNEGDYKHEYPIISNASCTTNCLAPFVKVLEQKFGIVKGTMTTTHSYTGDQRLLDASHRDLRRARAAALNIVPTTTGAAKAVSLVLPSLKGKLNGIALRVPTPTVSVVDLVVQVEKKTFAEEVNAAFREAANGPMKGVLHVEDAPLVSIDFKCTDQSTSIDASLTMVMGDDMVKVVAWYDNEWGYSQRVVDLAEVTAKKWVA
>CRv4_Au5.s1.g1194.t1
MWKFISAGTTGGPLLRSLNGNKGRQTWEYDPAAGTPEQRAEAERLREEFTANKDKHHHSGDELLRLQSADRIRAKKHSPPSGPVPDAPDAERVEEHLKGAISFYECLQQEDGHFPGDYGGPMFLLPGLVITLYTCGALDQIFSPAHKKEALRYLHNHQNEDGGFGLHIEGGSTMFGTGLNYVMARLLGLAAEEPLCVKAREWMHARGGATYITSWGKFWLAVLGVYSWDGMNPLTPEMWLLPHNKWTGIGMLHPGRFWCHCRMVYLPMSYVYGKRGTCQETPLTAAIRQELYPMPYGRVDWNAARNQCAKEDLYYPHPLVQDILWWALYKAENVLQGSWLRRAALAECMKHIHYEDENTRYVDIGPVNKVINMLACWLEEPGGKAFQKHLPRVHDYLWV…
>CRv4_Au5.s1.g1213.t1
MSTSIVVDPARGHAEERAQIGGLTAATASKGDAALFRLFITPLEVWNKVVATGVAKAKYSWPKKVLLSFLAGAYLSFGMAFAFLVGGQLKNIKVDDPGLYNVILGFFGLPFGLTMIILMGSDLYTSDVTFMLAAWCEGKTKMTAVVWNLVYCWFGNLCGSLFMVQMYIWGDVFSGREAFEESVALKKTSPDFGVNFVRGMLCNWLVNIATWQAMTAQDVTGKFVGVLIPVTIFVASGFEHCIANQFGIPMGMRLGGTAQYVTTSEAIVKNYIPVTLGNSVAAMIFIVGFYFFSIGSGHDMVVNSWNSGVTRYLPPMLAGWLQTGDVVAAEGGLQPLPGKFIGDISVHYGGVAGGGGGTPSHRGISAALRALTSSMRGTHAPPPAAVVSAQPQAATGEGA…
>CRv4_Au5.s1.g1214.t1
MYGSAAPRFMPAVNKWLGGGDGGGGTQLSNFLITTAVCCPARTSILTGKHAHCHNVTTNYYPSGGFVKFLELDVEKTWLPTRLQEAGYQTILVGKFLNGYYTSEAPAGYVPKGFTVFDALTTNAYNMTNSCFSRNGGRSTCYPSDYQTDLIGVKAKNYISAAVRAKKPFFAYVTPTAPHRSSTNLVTWHPPTPASRHKDLYADENVTLPLGPNWDVRNPDLPRKGNANNSPTFLANINALHLARLGSLRAVDEMVDSLVGHLQDLEVLDNTIVIYMSDNGYHMGAFSLLDGKNLPIEEDVRVPFFIRGPGIPAGQVLPHQSTNVDLAPTLLALAGLPIPPDMDGLPLPLSEPLMRPVYEALLQPPQQQQQQQQEPPQPPPAVTVAAVATGPWQLREASI…
>CRv4_Au5.s1.g1215.t1
MHDDVYNSTGPKYMPALNRLLGAGGTRMSNFVVPTGLCCPARTSLLTGKLAHCTNVTTNYYPSGGFVRFYQQQLDRNWLPVWLRAAGYNTGLVGKFLNQYLETYAPSGYAPAGFTHFEALTVNAYNMTNSCFSLSGAASTCYPGEYQTELIMTKALDYIGSYAAANAPFLLYVAPTAPHRSSTDGILWYPPTPAKQYANLYSASENQVPRGLNWDFRNRNLPRRGAVAVDATFEAFMDSLYLYRLRALRSVDDLIGSIVGKLQRLGVLNNTYVIFTSDNGYHMGAFSLLDGKNLPIEEDVRVPFFIRGPGIPAGQVLPYQANLVDLAPTILALAGLALPGHLDGLPMPLNPQLAAAHTQVLLASVAPAPEASGQTEGGSVAAAGSEKAAWGGPMLRDTT…
>CRv4_Au5.s1.g1224.t1
MQLLSSGRSRAAVEPDVAPLVQRWLQWDRRGASRQRVTQLLEDGSSAQLRELLGSRLEFGTAGLRGKMGPGTARMNAVVVQQTAQGLCVYLEAVAAEQLAAGGIVVGYDGRHGSKEFAALTGAVFASRGHRVALFRRVVPTPFVAAGVAELGAAAGVMVTASHNPKEYNGYKVYWGNGCQIIPPHDAGIAAAIEANLDLWNLEPLLAGDGPYEDDVSTAGLLACPQLSDPWERVSAAYYARLEALGYLPAAEAAETAEAASRRGGASDSGGAGGLSRAAALGALGTPVYTPLHGVGAEPLLQAFRTFSLPEPYIVPSQRLPDPDFPTVVFPNPEEGAGTWAAAFAAASERGARLVLANDPDADRLAVAERSPSGQFRPFTGNEIGALLAHWVWTNFRKR…
>CRv4_Au5.s1.g1248.t1
MSTDSDEDGHPLDEYLANAARRARQAPGSAAADEADSEGAPASNGDDDGEDVDLPLTEGEDDDTGGDVAGGGGSQSLSEGGGHDGSGSGGEEEGEVSGDAGDDDDDNDDNDDDDEQGQRGAGGNRGGRGEEVVEISDDDDDNGEDARDALASGSGEGYDSDGSGADESEDDRAEPPGTERGAAGGGGSGRTCTDDGSDDEDGDGGEGQGGAGGAGERAEAAEGRRRASPAAAAADAVAAAAACGGGQAAAAPAAAAPAASAAAAAAAPADKPAKTGTKRKAEGDAGADGGGAAGSGGAAPAAKRQALAAPGARPVGVVIVDDTADIVRDFEMTKLLRNPRYFDDYTEVAPTYRCFNCGQAGHAARDCTNAARVKPCYLCAQFGHDGRDCPNRLCFRCGR…
>CRv4_Au5.s1.g1265.t1
MIMRICSLGCIILSLASWRSVQGSRSEEDTFIGWQGEQYAAFHTSTASDEVIGEGSLFSLNETARPAWIQTISYKPRAMVYHNFLSDRECRHIIDLAHAQMKRSTVVGSKNAGVVDDIRTSYGTFLRRHQDPVIAAIEHRLALWSHLPASHQEDMQVLRYGPTNKYGPHIDGLERVATVLIYLVEPDYGGETAFTESVWSHPELQGQAERANLSQCARGRVAYKPKRGDALMFFDTMPDYKQTDVHSMHTGCPVVEGVKWNAVKWLHGTPFRGDEYERALKEPFKPLPDPGICANLHEMCETWALQGECKNNPGFMIGAGASMGSCRLACNDCERCAEGDMDCYRRNRDSGGFLNFDESELKGI
>CRv4_Au5.s1.g1272.t1
MALLAAKTTSPSVTTRRSVTGLPSVSGFRASRPTRKHGIYVRAMAAATAEEAELRKQLTNLDRVTILSEALPYLQKFRGKTVVVKYGGAAMKDPTLKAGVISDLVLLSCVGIRCVLVHGGGPEINSWLAKVGIEAVFKNGLRVTDAATMEIVEMVLGGRVNKSLVSLIQQAGGKAVGLTGKDGQLLRARQMVELDIGYVGEVTKVDPTILNVLVEDEYIPVVATIATDYSGQALNINADTAAGEIAAALKAEKLVLMTDVPGVLRDKNDIGTKIQALDIRSCRELIQDGVIAGGMIPKIECCIRCLSQGVKAAHIIDGRASHSILMELLTDEGVGTMITG
>CRv4_Au5.s1.g1279.t1
MALTMSAKSVSARAQVSSKAQAAPAVAVSGRTSSRVMPAPALAARSSVARTPLVVCAATATAPSPSLADKFKPNAIARVPATQQKQTAIITGASSGLGLNAAKALAATGEWHVVMACRDFLKAEQAAKKVGMPAGSYSILHLDLSSLESVRQFVQNFKASGRRLDALVCNAAVYLPTAKEPRFTADGFELSVGTNHLGHFLLTNLLLDDLKNAPNKQPRCIIVGSITGNTNTLAGNVPPKANLGDLSGLAAGVPAANPMMDGQEFNGAKAYKDSKVACMMTVRQMHQRFHDATGITFASLYPGCIAETGLFREHVPLFKTLFPPFQKYITKGYVSEEEAGRRLAAVISDPKLNKSGAYWSWSSTTGSFDNQVSEEVADDSKASKLWDISAKLVGLSA
>CRv4_Au5.s1.g1280.t1
MVAAARGRGGSSGSTGDLRDPWREEERRQALLKYVREVQPASVVQFAEQTNPQVVAAMRQTVLNVVGSLPPQYFDVRINTVAESLAQLMLSIMTTGYMLRSAQFRMELQQSLRSLPSHSTATASGAAAAAAAGGATASGAGGLAAPTVAALSPASSGSLSRASSSGSSSSSGAVSSSDSGDAVVAGVALSAAEAEAEAVAAASAAVGTAFLYDGLGSPYAPGVQKKGVEGEVLRWHLDRGEVQRLPVAAYIDMLERELAALRAQLGPAAAAPDGFAAGALSGSGVGGGSSGGMGSGGGAGPAFGMPIAMAGGVEVLGPETPTGSFGSAGSGYASASASPASSSASMDGLVCVSPLPGFGERIGSGISGGSGGGGGWGLGLGLVAGGAASAAAPASMGSG…
>CRv4_Au5.s1.g1301.t1
MPLLLPLPNAIALTPHPSLPPSLPPSLLLGIPIDGKTVFTSDHALKLEWLPNWIAIIGSGYIGLEFSDVYTALGTEVTFIEAVDNLMPGFDREIARLAQRLLINGRPIDYHTGVIASKVTPGVPGVKPVVIELTDFKTKEKVDEIEVDAVLVATGRAPYTNGLNLPAIGSATDRRGFVPVNEKMQVLDTAGKVVPHVYCIGDANGKYMLAHAASAQGISAVENICGRPHVVNHLSVPAACFTHPEVSFVGVTQERAEELAKEQGFKLGVSKTSFKGNSKALAEKEGDGMAKMLYRKDTGEILGVHIIGLHAADLIHEASNAIATGQRVQDIKFCVHAHPTLSEVLDELFKGAHVEGPAAAGNGAAKAAAAPKAATETSSVVDAEEGQREQGEAPAAAVV…
>CRv4_Au5.s1.g1303.t1
MAMTLSTKAFAQRGVSARKNTVRVYAASTKVNPKLASKTEVERFKQATGLPAPAINGKQFPLKLGFTKTNELFVGRLAMVGFSASLIGEILTGKGALAQFGYETGLNGIEVDGLVIGLIAFNLIAAVLPTSQTFVPEEQDTISERPAGPLQDPRITLLEPKKFFGVQGFGFTKENELFVGRAAQLGFAFSLIGEAVTGKGALAQFDIETGLSLRDTEFGLVVFILFLLFAAINEGSGKFVDEESA
>CRv4_Au5.s1.g1306.t1
MAMTLSTKAFAQRGVSARKNTVRVYAATTKVNPKLASKTEVERFKQATGLPAPAINGKQFPLKLGFTKTNELFVGRLAMVGFSASLIGEILTGKGALAQFGYETGLNGIEVDGLVIGLIAFNLIAAVLPTSQTFVPEEQDTISERPAGPLQDPRITLLEPKKFFGVQGFGFTKENELFVGRAAQLGFAFSLIGEAVTGKGALAQFDIETGLSLRDTEFGLVVFILFLLFAAINEGSGKFVDEESA
>CRv4_Au5.s1.g1337.t1
MKEAEAESGPASGHGRVFRVGCALLPKKVARYYTSAVRKVARLKGIKLELLDPARSLLDQGEYDAIVHKLRPNTAWEQNLQEYIRAHPGVKVIDSLAGIRIVHNRATMLLPLREHGGLLLHPPHGYTPRKPHVGASGFHTARVTSPMQVDINEGCTLSEAQALLAAAGLKPPLLVKPLWTDGREGSHGLAVLHDMAALGKVLHGAVSSELKPPLVVQQFVAHGGVLFKVYVLGQRTVVCQRPSLGENYLGQEAKRAGVLSLPRISCKSTYAKDSPEYRFSAGVIYGTGNGTGAGVRTCGVAPVATSTAEVQTCSSRGGAAGGTAGSGLQGSGHGAADASTGPDSSEQAVLRRARSPHSPPPPAPPGSPPSTPPHPGSAAEASGGEAPAGPVAQTTPSAH…
>CRv4_Au5.s1.g1339.t1
MQTSYERNDGNGGGTGRQAQGGATPGQAAASVQLPPPHSGLEGRAWGRGAPPLRPGRLQVWWTPLDLATTCSPASAARNRGCITPAEAAEVAGSKSPEVAAKRTAARALARTVLARAVGGALAEEGSSSSSSSSSSSSSSSSSSSSGGSSGISSTRGSAGACVGASGAHSASNGNGDFCMGNGNGNGDAAAVTPQDLRFARNGHGKPHLVPGGNGWPVLRHNLTHTHDLAGVAVLREPGHCSAAADAQGSGTSSTVGSGGGRGRGGGDGGRVVMSVGLDVERLDRAPRDPMALARRRLAPAEVRDLEAITDLKQRARHFMWLWTLKEAYVKARGTGINAPPGLKGFAIGFREMLDDQRLAVQAVCGASQCASPRLTAITITHCAAAAATSTAATPPPAT…
>CRv4_Au5.s1.g1345.t1
MALQQAAPRVFGLLGRAPVALGQSGILTGSSGFKNQGFNGSLQSVENHVYAQAFSTSSQEEQAAPSIQGASGMKLPGMAGSMLLGKSRSGLRTGSMVPFAAQQAMNMSTAAQVQSGATVNSLLLGIYRFWRSQAPMDKPHAPVDDRMLPAIVDASDNRAALGTWATALFCTILASNLLGLVPTNEAPTSGLGFATGLGVSVWATATTLGLYKLGFSFPGHFIPGGTPWPMAFIFVPLETISYTFRAVSLGVRLWVNMLAGHTLLHILTGMALALPFSLSFFAMVPATFAVACLLSALVGLEYLVAVLQSGVFSILSTVYVGEFNSVKLAGPLAKVVKKAL
>CRv4_Au5.s1.g1374.t1
MGNMPRISHRLLELELELELLGPASESRPKDTMGSVEVPANKYWGAQTQRSLLNFRIGVSVGGGGIGGAAAAAVAATAGGPVAASERMPEPLIRALGLVKRATAEVGRQATG
>CRv4_Au5.s1.g1377.t1
MQQLAASTSFGAQQFRFIGGDRVPEFWGKPSPYTGGTDFLGTPKNHLDLIKKRPLSPDVMEIDNKSAHYKFPLGALSSITNRVTGVALSVGFAGAGVFALRGSLDGVVAACAGSFLIGFPLKFLVSYAIIYHWLGGLRHIVWDVSKIGNQADRTSLLELPKVEMSSKVLLGASAALALIAAVL
>CRv4_Au5.s1.g1397.t1
MAQAAAAPADNTKKLWGGRFTGKTDPLMEKFNESLPFDKRLWAEDIKGSQAYAKALAKAGILAHDEAVTIVEGLAKVAEEWKAGAFVIKAGDEDIHTANERRLTELVGAVGGKLHTGRSRNDQVRVGGWVGGWGWGGWVGGWVSDRDFVIETVFAASLLCVHLSRWAEDLIIYSSGPFGYVQCSDAYATGSSLMPQKKNPDALELIRGKGGRVQGNLMGVMAVLKGTPTTYNKDFQECWELLFDTVDTVHDVVRIATGVLSTLRIKPDRMKAGLSADMLATDLAEYLVRKGVPFRETHHHSGAAVKMAEDRGCTLFDLTVDDLKTIHPLFTDDVAAVWDFNRSAEMRDTEGGTSKRSVLEQVQKMRTYLAAEGQH
>CRv4_Au5.s1.g1425.t1
MAEGSLAGFASLEELLEEYVPADKLKQAKRVIYGLNLGEPVGELQLDAGVLERAKAMGFDLRSALFRAAPEQMRPPRIVRIGLIQNKIVLPTTAPFAAQAQAIRDRVEVMLDTAGRAGVKVVCLQEAWHMPFAFCTREKVWCEFAESAETGESVAFCQAAARRWGMVVVCPILERDAAHNDTVWNTAVVIGHNGNIIGKHRKNHIPRVGDFNESTYYMEGNTGHPVFETAFGKIAVNICYGRHHPMNWQAFGMNGAELVFNPAATVGDLSEPLWPVEARNAAIANSYFVAGINRVGTESFPREFTSGDGKPAHKDFGHFYGSSYVAAPDGSRGPSLARHRDGLMVADVDLNLCRQTKDKWGFQMTARYDMYADFFAKFVKPDFKPQVIRDPAL
>CRv4_Au5.s1.g1489.t1
MLVWNPAASSSRRSFSVGQLGVTAAFALAHDGDLLFPGAGSDARELHASLRSCDEFGYPMKKCRSHQSMAPTSETVMEEDDLMPPAYAVASAPSNAVPTLDDPDACGCGSPRAHDLCCGEGSAQAGADTRRALSRFAGNDGSDQQRAAGAATAVAPAAVAAATAEATVEHSATASTTLSSLSGASSPAMQAQLRSIGLESLAAAAAAAAAGKGVSAHAVVSAVPSPCYQPAPAPAPAPAPAQAQAQAMRQRSQGMDRSNSSDSDGDDCGGSLIGPFGMLSASQWDELNDAIRQRKSDGPLRRAGGAATVASAPVVVSCDGGAAGGGGGCHPSEPAVVSVSARVAGKGSGSLASAPAATLSAAAAAAADVASSGSACVCALATATTATSCSSGCGAAAAT…
>CRv4_Au5.s1.g1496.t1
MGWNSWNYFRCNINETIIRSVADAIVSSGLMDAGYVYVNIDDCWMEKRDNATGRIVPFADKFPSGMKALGDYIHSLGLKFGVYSDTGKHTCEGYPGSAGYEEQDAATYAEWGVDYLKFDYCDMQDTKESVQATYERMRDALAATGRPILFSLCSWGSGQPWLWGKDVGNSWRTGIDVFAAWDAAQAKALKLPNFLQPILGAVRQTQGLAPYAGPGGFNDPDMLVVGLDGMYPYGIVQDCPEHVRGCKPGMYISRDRWGKVGGLTQTEQRTHFAFWCIMAAPLILGNDPRAMSKATLEILLAREVLAVNQDPLGLQGRPVWTQELDGASAGKSLEIWTKPLADGRTAMLLVNLGEATVDITTVFSRDMPEEHKQWGREVPNRDPVCMDKHASCKEWADAG…
>CRv4_Au5.s1.g1522.t1
MQCQLHQQRRAASSASAGRPAGRPSLPLRPLVRASATSSSAPASSSSPLLARRVGSGVTASPLRPGNPSGRNAGLRSRVVPQGLPDPVAVGLFFAPGLAILAYAMVRGKGNLTDGLSRVLTESEFLSLGLDIIGLGVFNFDFGSINSESPVIKAVYGVLKEAEHRSTFYLPYWNLPLADVLVPRQAKFRADLKVINECLDNLIKQARDTRVAEDAEALQNRDYSKVSDPSLLRFLVDMRGEEPTNKQLRDDLMTMLIAGHETTAAVLTWAMFCLVQSPESEAKVLEEVDRVCGDRTPTLEDLKAMPYLRACLGESLRMYPQPPILIRRALAEDTLPAGLRGDPAGYPIGKGADLFISVWNLHRSPYLWKDPDTFRPERFFEPNSNPDFGGKWAGYRPDA…
>CRv4_Au5.s1.g1537.t1
MAPITGVFVNSRKQKLHTLKYPAKGAPVAELFIHHGLAEHCGRYDNVCQTLADQGIEVTTYDAHGHGKSEPTEEGGRAFVGNYKHLVDDMCDFMDFVHKNESAPAPAAPAPGAGSAAEGSAPAAAAPAAAAHGKLPVFVLGHSMGGLVAALTALRRQERLAGVMLHSPALDVEWNPVLRVQAAVGGLLSALVPRAKLVPAVRPEDMSQDPAVVAAYVNDPLNTQGNVRARTGNEMLRGFAEVGKNARKLTLPVYVAHGTKDACTSVAASRRFVEGGVSSADKTFRAVEGGYHELLHGPEWRDCTEHIASWIKSHAAAAAGKEAGKEAAKAEAGSGSKL
>CRv4_Au5.s1.g1557.t1
MQLCKVQRASAARSSRASRSQRVEVVCASSAKFFVGGNWKCNGSVANVAKLVDELNAGTIPRGVDVVVAPPFIYIDYVMQHLDRDKYQLSAQNAWIGGNGAFTGEVSAEQLTDFGVPWVILGHSERRSLFGESNEVVAKKTSHALAAGLGVIACIGETLEQRNSGSVFKVLDAQMDALVDEVKDWTKVVLAYEPVWAIGTGVVASPEQAQEVHAYLRQYCAKKLGAAVADKLRIIYGGSVSDTNCKDLSKQEDIDGFLVGGASLKGAAFVTICNAAGPKAKP
>CRv4_Au5.s1.g1566.t1
MGGKPSKPQQQAPSAPAQTEEIALPPVPGSLPADAQIVFVLGGPGSGKGTQCDKIKADYECVHLSAGDLLRAEVKSGSEVGLKCEALMKEGKLVPVAVTLNLLKRDMIASGGKFFLIDGFPRALDQAAQFENSIMPCKTVLFFDCPEEEMEKRLLKRGETSGRSDDNADTIRKRFHTFLDQSLPVKDHYLTQGKCHVISAVAAPDDVYGKVKVVLEGLHAPKKASAAATALAAAPAASEDIALPPVPGNLPADAQIVFVLGGPGSGKGTQCDKIKADYECVHLSAGDLLRAEVKSGSEVGQKCEALMKEGKLVPVAVTLNLLKRDMIASGGKFFLIDGFPRALDQAAQFESSIMPCKTVLFFDCPEEEMEKRLLKRGETSGRSDDNADTIRKRFRTFLD…
>CRv4_Au5.s1.g1576.t1
MASAKEAVRLASRLCQEVQRQLSAEERVDKKDDSPVTVADYGAQVVVAWTLQRADPSTRLSMVAEEDSTELRTPAGRPMLDRITALVNSVVAAAAPGEVLSPEQVLDIIDLGASQGGPSGRHWVLDPIDGTRGFVGMRQYSVCLGMLQDGEVVLGVLGCPNLPQGPVGDDDGATGSAQRLSGDADVGCLFFSERGQGAWVEPLQNAGDAAPAQVRVAEVTEGAEARFMESVESRHSSHSINAALARELGVVRPPLRMDSQVKYGLLSRGCGTIFMRFPPATYKEKIWDHAAGFVIVEEAGGRVTDAAGVRLDFSKGRFLALDRGIIAAPPALHEKLVAAAAKVAPKA
>CRv4_Au5.s1.g1600.t1
MARKASPAWCLSAALLLVALGIASAGPALVPDSVKPDPKGDGYIVSFTLNVTVAYGAPSCFARSIVLTSGYFEPAIVINQGDTLRINLINNIPASFPTVSDGISIHYHGLRMSGPAAWLDGVSYIGLCPVAPGSSYQYEFKVNDPPGTYLWHDHAAGFKGDGLEGPLIVLPPRAGPPVLPQPGAAPAWPPAAQPDLWSYDGDETLFLGDWYHATTSSMLFRLNQPFDNAKVTNDSGAWNWVGNPQAVLVNGAGFYGDCSLYPVAGGGPTPPACAPSAFTVAAGRSAQQPWASNNNPGCTHTQVTVQPGKTYRLRLVNAALLVYMTVCFEGHNVTLIAADAVPVAPVSTQCVDVNSGQRIDVLLKADQPAANYWISVVPQYRTGAPAGYAVLHYAAAGVN…
>CRv4_Au5.s1.g1601.t1
MRRLGLRAKSGLTPYGTPLPRVAHRRLEPVKPGRLIVVGDLHGTPELFTLLERLSFRPSHDNLVLVGDLVNKGPASLRLLEALPGLGAVAVRGNHDDAALAAWLAWRQKGQPLPSKFEWSRDMSPAQADLLAQLPFTLAVPQYGVAVVHAGLVPGVPLKQQKLWACYKMRNLVPHPHGDGGGGGGGGGSTSGSGGADPATATSASTSTSTSAGTLTATASSTVTGHAPGARYTAVEKAKEGGQAWAPLWPGAEPPAQHVFFGHDAKRRLQLAPHATGLDTGCVYGGELTAAVLPPLGELVASSPGFVAAMRHGRPLTREDLRVQLVSVPAARVYSAPDGHADTAAAGAATAAAAGASAGSGSGSSSGGMAKEAGRAYIGGIPTAATASAARFEERLRYL…
>CRv4_Au5.s1.g1611.t1
MVMTGRSSKADMASWHDYWRAGITNSVGPACGMVALKNITYSAQVLAKSCKMVPVMLMGVMLHGKRYTFVEYVCMSLIGLGVAAFAQKGRAGGVVSPNPLLGYSLCLVNLAFDGYTNATQDEINKRHPRNSSIHMMCWMNFWTAIYYAAYMFLPCALPGAGGTCTGMDLVSFCSRHPDALLDLVIFCLCGAIGQLFIFFTIKTFGSLVTTLVCTTRKFFNILLSVVWNGNPLLANQWLGVAMVFAGLLMQGYMKGKKPHHKKKAD
>CRv4_Au5.s1.g1622.t1
MSLLRAPTSCSRTVQSQQGRSRKSPVVRAYLEEKKAPLPPPRGPYSTVPAQTFKNQLEALKSMSVVVADTGELDLVKKYHPQDCTTNPSLVYKALSMPENRHYLEKALAKDKRQPEHVHAGVSRPYAGVADQLAVDLGAELLKIVPGRVSTEVDANLSYSTQASVDKALRIMELYAAKGYNPSRIYIKLASTWEGIEACRRLEKQGINCNMTLLFSFAQAAACADAGATLISPFVGRIMDWYKAKEGRDFASHEDPGVLSVKRIYNYYKAHHYKTIVMAASFRNAGEIRELAGCDNITISPQLLDELQKSTEPLDRKLTPEKAQTDALKLSNMHEDLFVKLHGADQMAVEKLDQGIKGFVADQKKLEDLLASIAMMQVRENH
>CRv4_Au5.s1.g1623.t1
MAHSLAQHRLSVPKPSRVQQSRSRLVSKRTACIVYAKHKTELDVVLVGDIGGTNARLSAWRVDLEGAGATQIDNETYPSQDFKSLDAVVDAFLARPAVRERPPHAAALAIAGAVSANKCLMTNVEHWPIIDGDDIQARHGFRVALLNDFEAVGYGIPVLGPHDVVPLNDVPVQPKAPKVVMGPGTGLGAAQLMWDTGLNAYKVWPGEGAHATFAPRGWKQKALARFVTTRSGHCEIEEVACGSGLELIYEFLQSDESANRPDLLKNRTKKVVKEISAAALDGSDPLAVEAVDLLFAIVGAEAGAMALRCLAKGGVYIAGGITPKLLPRVKAGSLLEGFLMRAGREPFHKILAQTPLFVITNEQVGAMGAREVAKSLLHQQQ
>CRv4_Au5.s1.g1656.t1
MMLANTRLSQPAVASKRSAGSRVIVCKAATTVPNKPEPVQRIQAPAPGAQDDDKPYLNVIPNNGQWHNGIPPVMGGHLMSSGTVAPISTSKGAGIDLVPHQFQYHDTETDVNVLLYVTPEKAQAGLVKLVEEAAAEAVKAKGAFTLVLSGGSLPSLLAPLAASKSVDWSKTHIFYVDERNVPHSSADSTHKAVSEALLSKVPIPAAQVYAIAEGLPVGQAATQYEGRIISIPAAALPRTEGAALPKFDLILLGVGPDGHVASLFPNRPETAATSGWVLPVSNSPKPPPERITFSLPVINAAKEVAIVALGEGKKEIVQRALEVQALPGALPAQLVRPKGGKLKWILDVASAQDLDIAAWNESKQWPRSSF
>CRv4_Au5.s1.g1674.t1
MSSAADSAVPRALVYDAPGEPLEALSLRELPALTAPGPGQVQLRYLSSPINPSDINTVQGKYPIMPKLPGGVPGHEGVAEVTAVGPQVTGLSVGDWVVPLAPAQGTWRTAGTYAAADWHAVPRDIGLAAAATIVINPPTALAMLEIFVALQPGDTVAQNGATSAVGEAVIQIARARGIKTINVIRERPDMDAAVARLKGLGADLVTTEHKLKEDLKASGLPAPKLGFNCVGGSAAQAVTSVLADGGTLVTYGGMAMQPVTAGTAAMIFKDISFRGFWLTGRWAAAQGPEGRRKALDAIVALYRSGALTPPPLAPFPLATADDPEAWKRAFERVAAPHRGAKVVFDMRGGAEA
>CRv4_Au5.s1.g1713.t1
MSRVPGLLLRATHSCSSGSSSGRDSNPSAAAASSGNSPTTTSSSSSSSDGREELFVGGYTPITKKLWTERRRQAQSAASAAPGAAPAEAATGPAALLPDGRRAPQDISVVYNFSSDKALLDMYRNPWGHMRVGRLLEDLDSLAGNVAFQHCYTGRGASSGGGSGLPLLVTAAVDEIALTHPLLLARDVVVRGQVVWTGRSALDIRMQLFQAQHEPAPSLEALFSFVHLDPATRKASPVVQLAPQTPEQQAAFAERQAVADARKAARQKQGGGDAGVQAALPQETREWIRDARKLQELPALAAADGVLMPATRQHNTFICQPQQRNTHGRVFGGFLMRRAYELGFATTYMFGGSRPVFLKVDEITFSRPVDVGDLLRLTSTARVVVEVEARVTKPEAVES…
>CRv4_Au5.s1.g1717.t1
MGRGRISNTASASNAIVLPILLLLLAAPSLRRTAAAQVVTDASTLESSIVSAIRTDMLRQEAAAATAAALGHRRRLTQAVGEPGFGLLPSEQGDEQQQQQEEGGWWGYVEPQALQRQQHTAAHDGAVTVHATAAATSTADSDAQHQQETRSAADAAIDELDAATAELAGDVAYWRDDTSSSSSSSSSSTSTSTSTSGGSSSPEEVVDHWMEARIMQQLITAMSTNTGTYGTYPPPATPSPTPSPTPSPTPSPTPSPTPSPTPSSPSPSPPSPSLPSPSPSPSPSPSPAPSPSPAANTNTTNSSSTVDVPAGSTTQLFAWTPVFPSPAKLQAMSLSVLQSLGASSGSNVTVTVFAAFVSTVYRLRHGGSSNNNNGGGSGRRRLAQTAGANSTASINSTAV…
>CRv4_Au5.s1.g1718.t1
MWNKSRVRELFPEGLACDVLVIATCPTSCALVHGIPGKQLIGSVLAPGVSLAGISLGAEPLPSDRVCAIYALGSSSGSSRVLLVACQYEVARERAVAWSRALLGQVAAAHVLVLGAIPAEQFRGQGDASQEELLFLLRTRAAAAAAAAVGRPAAPLLPTGTVVGGLPAALLSHCQVRDQSAELLVAVEMVLEGRAALVEAMAAALAAVLRARAVGHAAEALAGGSAVVAARATLGLGPGPCDVYV
>CRv4_Au5.s1.g1719.t1
MNATMQRSAVAGRTSGKVATTARASSMARPRLPIAGRVARRSAVTVRAVAEPVVVDKAVEAPAKPVPSGGDPWEDEKWTKYKWTVYRGVAYDLTPYLDRHPGGRWLLNLAIGRDATALFESYHLRPEVAASMLKRLPVLADFPVDAVPPSPRPNDSELYNAIRERVRKEVFKGTEIKGAHRSGSEGAAFAVLGYAAAMYALYTYDANPLTGALLGLGGAWIGLTIQHCGNHGAMSTNPVVNNLMGLTNDLAGGSSLMWRYHHQVSHHIHCNDDALDEDVFSAFPMLRFDDRLPKAWYHQFQHVYMWALFPFLQLVFQIGDWQALLTNRTVGATLYGASNFERQTLIAGKLAHYFLLYGLPAFLHGPTAMLGGAAGYLFTQSIVLAATFAVSHNVPETKP…
>CRv4_Au5.s1.g1722.t1
MKATASTAEKKAEAAEVEEEFDGPEVNPSTQEVAAFINTLCNDTEIAEMHLKMGSFELKVKRSVSGGAPVYAHAPVAAPAAPAPAATVSVDVPAPTVEDTVDESLVYVNAPKVGVFRRGKYAGGKRVGKGNLIEVGAQVKKGQCIGYVEQLGTFVEVKCPIAGELVKVHVEDGKPVEYQQLVAEVAPFFGGHIIGDSKYAF
>CRv4_Au5.s1.g1728.t1
MVSTRGGSREPGRAKSPLGEVDRNRRPTRLAASYPKQYNDSEFVDSEDDFSDFEELPQKNGGTTKSSGKGDAKDVPRRSSRRSVPAAVAPPHRGGSDGERAGGSGRAGSGGHHHGEGDGHVAETRRHTRASELRDQPKRSEEDEEDEEPHEEEGGAESPQARMGPELQADAPHTSDEEGSEDSEEEEEEEDDRRGGRSARHDRRDRNRERDSKRRAGGGGGGGGGGGAASDSGSEEGDSQGEGEDEDEDDEGGCVEDDAEEADDGGIWKGRYHLRGHQVNQLRGPPPKRPRYSEGPSGGGGRRRPDHDDDDDEEEGSSEEEEEDDEEEEAGGKAAGRQERDRGRDRSRKRDRKGGGGPAARVRYTLRDRSRMVPMSVQEQQRQKEELQREMMARQRIRE…
>CRv4_Au5.s1.g1730.t1
MADPVSLAASCAMPPVLSKSAVAPGEVKRSAHIKMDSYNVGAVAPYQAMPVAGPVITHHKSTALPVVEPHPEMTAEEREAQIAEMIGSYMKKLAERTHHHMGYPYNLDFDYGLLEGLTKYSINNLGDPFIESNYGVHSREFEVGVLNWFARLWEIDEEEYWGYITTCGTEGNLHGILVGRENFPDGVMYASSESHYSVFKAARMYRMEAEKVPTLESGEINYDDLKAALVKNAGKPAILNVNIGTTVKGAVDDLDRVLEVLKEAGYTEDRFYIHCDGALFGMMMPFLSRDAPMVTFRKPIGSVSVSGHKFVGAPVPCGVIITRFKYVMALSSDVEYLNSRDATIMGSRNGHAPVYLWYTLTRKGYDGMRRDVEKCMRNAHVLQQMLESAGIRTMLNELS…
>CRv4_Au5.s1.g1736.t1
MNTHLNSSLSNGASTGGSSRALIAGRMVAPATRSVAAAQPRCAGPSLPLPASLLGSRPAPCSRLAGRRLTRQLRTHSTQPATPAYEPRDGASPSSSVADAAASTWDAAQQPTTSSQFAPQARAAAAPKRVCIFVEPSPFTYVSGYKNRFTTMIRYLVEAGCQVLVVTTGKGYTLPGVDASSFREQPETFAGARVVSALSFGCPWYLQVPLTFALSPRIWREVRDFQPDLIHCSSPGVMVFAAKLYAWLLKKPIVLSYHTHVPSYLPKYGISYLVPAMWGFLRMLHATAHLTLTVSPAMVDELVTNRAVNSAKQVQVWKKGVDSEVFHPRFRSAAMRERLTGGQPDRPTLVYVGRLGFEKNLFFLREVLQRNPGVGLAFVGDGPARQELQAAFKGTPTQF…
>CRv4_Au5.s1.g1737.t1
MQCLSRSSLRAPTLSTRARAAPVLRRSVVKVANVAAIPEAPQQDRFKRNADGTYDLSAPPPFTLQDLRNAIPAHCWEKNTFRSMAHLALDVGIVFGLAAVAFTVNQWWMWPLYWVAQGTMFWALFVVGHDCGHQSFSNNKALNDFIGHLTHSSILVPYHGWRISHRTHHANHGHVENDESWHPVTKKLYDHLEPMARVGRLSMPWALFAFPFYLWKRSPGKEGSHYDPECDLFTAAERNQVLTTNAYMLGMVAVLAACTIKLGPLAMFNLYLIPYWINVVWLDIVTYLHHHGSHDQNEKMPWYRGEEWSYLRGGLTTIDRDYGIFNKIHHDIGTHVVHHLFPQIPHYNLEEATEAVKPVMGPYYREPMKSPGPLPTHLVEPLIRSFTNDHYVADSGDIV…
>CRv4_Au5.s1.g1743.t1
MVKTTSHFTNKRGQKLYWVAHVPDSGEVKAVLCWHHGLGEYIDRFDATFKVWADAGIAVYGFDVHGMGLSEPSKASDRILVKKFDYLPEDAIHFLEEVLQPALKANGTDSKPLFMAGNSLGGLVGSHVVLRRPDTFAGLLMQSPAIDVEWTPILKFQAAVGNILAAMVPRAHLVPAVRPEDMSQDPAVVQAYLDDPLIPKGNVKAQTGNECLKGFRALVPLRKQFKLPIYAVHGTDDKCTSLPALREHLKHVSSSDVTLKEVPQGRHELLFGPEKEEVRAEMRDWILAHAK
>CRv4_Au5.s1.g1752.t1
MDLNVALIACVFLVIAALALLSIRRKSSGNATAVSTAPPITRTSISAEDPSKPCVRILYGTQTGTAERFSKQLANELRGKYGDSTAVDVRDVETYKPERLGSEKLVVMCMATYGDGEPTDNAAVFYSWLLKEAEAVENGDKEPFLQGVSYAVFGLGNKQYEHFNSVGKKVFKAMKACGATALCRRGDGDDDGVIDDDFEKWCTELYEALDKSSDLVGKRADQNGVHAAPPARVAAYEVEVLRGSGGEAPAFPSGTGKDVHSPFWAKITTVRELHTPASDRSCVHVEVDVSGSGITYEAGDHIAIYARNGEAVVSQVAELLGFDLEARIKLALPADADAASGLPPPFPGPVTVRTALSYFADVLSSPHREALNALASFAADREEAARLALLGSPAGKAEY…
>CRv4_Au5.s1.g1788.t1
MAPTGRIERAKSKLKSTYAKFRSKAFVVRSMEEQKDKTASGFEMHKVLGPFSLVMLGIGCIIGAGVFVLTGVAARKYAGPGVVVSYALSAVTAMLTAFCYAEYAAELPVAGGAFNYVSMTFGEYAAWVTACDLVLEYTLSAAAVAKGFTAYTAALIGIDVSYLRLQASVFTLDLPALASVIGMSFILMRSTADSSLFNNLVTGLNVALIIFVLAAGFPHVEAENYHPFAPFGARGIFTGASVVFFSFIGFDTVATAAEEVKNPGRDLPIGIVGSLAICTCLYVLMCLAITGMQSYTVIDLNAPFAVAFDHVGLGWAQRIVAAGALTGIVTSLLGSLLGQARIYVTLGRQSLAPAWLAKVHPTRGTPVNATYVTMFTAGFLALFIEIELLAELVSIGTLV…
>CRv4_Au5.s1.g1822.t1
MQQQPVLLARLGPARLLARERNVLCYSSIAGAEKVPMSQFEPHEYLNDRYKAIEDRLKVVRKRLNKPMTLAEKVVYGHLDDPENAEMKRGVSYLRLRPDRVAMQDATAQMAMLQFISSGLPKTMVPSTIHCDHLIEGTTSPQPDREGKFGGEADLSFAVKSNKEVYDFLATAGSKYGVGFWRPGSGIIHQIVLENYALPGLMMIGTDSHTPNAGGLGMCAVGVGGADAVDVMAGLPWELKAPKVIGVKLTGKMSRWTSPKDVILKVAGILTVKGGTGAIVEYFGPGVDHMSCTGMATVCNMGAEIGATTSMFPYNKRMHDYLVATGRAPAASLADSFKEHLKADEGAQYDQLIEINLSELEPHVNGPFTPDLAHPLSKFAEEMRKNGWPTELKAGLIGS…
>CRv4_Au5.s1.g1823.t1
MLANKTSVRQTAGKASSRAQAAIPHLISSRVEVRASGVVPFSGVNVKAASASAAPRARAMAASRQAVRVAAAVDADYRKREPKDVRVLVVGPTGYIGKFVVKELVSRGYNVVAFARENAGIKGKMGREDIVKEFPGAEVRFGSVLDPASLRDVAFKDPVDVVVSCLASRTGGKKDSWLIDYTATKNSLDVARASGAKHFVLLSAICVQKPLLEFQKAKLQFESDLQAAGDITYSIVRPTAFFKSIAGQIDIVKKGNPYVMFGDGNLAACKPISEADLASFIADCVTEQNKVNKVLPIGGPSKAFTAKQQADLLFNITGLPPKYFPVPVALMDGMIGLFDSLAKLFPQLEDSAEFARIGKYYATESMLVYDEARGVYLEDETPGYGKDTLEDFFSRAVKE…
>CRv4_Au5.s1.g1834.t1
MLPASLQRKAAAVGGRGPTNQSRVAVRVSAQPKEAPPASTPIVEDPESKFRRYGKHFGGIHKLSMDWLDSVPRVRVRTKDSRQLDDMLELAVLNERLAGRLEPWQARQKLEYLRKRRKNWERIFEYVTRQDAAATLAMIEEANRKVEESLSEEAREKTAVGDLRDQLESLRAQVAQAQERLAMTQSRVEQNLQRVNELKAEATTLERMRKASDLDIKERERIAISTVAAKGPASSSSSAAAVSAPATSATLTVERPAATTVTQEVPSTSYGTPVDRAPRRSKAAIRRSRGLESSMEIEEGLRNFWYPAEFSARLPKDTLVPFELFGEPWVMFRDEKGQPSCIRDECAHRGCPLSLGKVVEGQVMCPYHGWEFNGDGACTKMPSTPFCRNVGVAALPCAE…
>CRv4_Au5.s1.g1862.t1
MSQMLLEKTMRRGLATVSAAASSAVGRPIPMAVRPSLTLGNVRGMRLGVPELAFRSPMRSMAAASAAAEALPVAPSHSCAADPDKHPHLPDPRPKPAVDAGINVQKYVQDNYTAYAGNSSFLAGPTDNTKKLWSELEKMIATEIEKGVMDVDPSKPSTITAFPPGYIDKDLETVVGLQTDAPLKRAIKPLGGVNMVKAALESYGYTPDPEVARLYSTVRKTHNSGVFDAYTDEMRAARKSGILSGLPDGYGRGRIIGDYRRVALYGVDALIKAKKTDLKHNLLGVMDEEKIRLREEVNEQIRALSELKEMGAAYGFDLSRPAANSREAVQWLYFGYLGAVKEQDGAAMSLGRIDAFLDTYFERDLKAGTITEAEVQELIDHFVMKLRIVRQLRTPEYNA…
>CRv4_Au5.s1.g1879.t1
MTIVQAKVDASTFQGCNRPLDKRIKVVGMGSCGVDYLASVAAYPRPDEKLRTEKLETQGGGNCANALTAAARLGLYPTLVTKIGDDGLGDGILSELHSDGIDTTHVIRAAGHPSPFTYIIVDRQGGTRTCIHTPGAALEPGEMTSGLLAGALEGAALVYFDGRLTEAALLLAREARRRGIPVLVEAERLRPGLQQLLAEADFVVTSAHFPQDWTGEAVLADALLATAHRLPSARWVITTLGTRGSVLLERPPPPAGTGGGSGSGSGNGSGNGSGNGSGSGGGGVAVVAPGVRALHDVLELELEPRLRALVAEVEAEAVCVAAGGQVIGAGHTASTDGFVQLRYSSPRDRAQEAAAAAAVAAERAAALNADSGRGAAYAGSGTSAAAAGGGGGGAAAGSS…
>CRv4_Au5.s1.g1886.t1
MRLRFNAILLTFFVSAVFHELLLGVPLHMVRLWAFAGIMFQVPLIMVTEMLRKKLNRDELGNYIFWIAFCVVGQPVCVLLYYHDYVVGIRPALLALRQAAAAVGGAAAAVGEAAAAAAAAGAGVAGTVAAGVGAAAAAAIGGMLGDGGTGAAAAAAGVVAAGNCTLGAVACGVS
>CRv4_Au5.s1.g1928.t1
MENGGSNGDQEVSTSDAVEAFLADSPVSGEAVADSVAAFIERHRSSGNTAFTGRAGPGLSRPIVVVTSGGTTVPLERRCVRFIDNFSAGTRGAISTERFLEAGYAVIFLTRTGSLQPFSQMLPAADPPEVIARVAMLQPPPAVAPAEGSLDGKAVSASSSGGADADNVVIRPEQMAALARVLRAQQACREHGTLLIIKYETIFDYLTYLRLISELLRPLGPDVMFYLAAAVSDFYIPWSELAEHKIQSADGPLELSLKRVPKMLGELVNKWAPRAFTVSFKLETDQRILVHKASTALHRYGVHLVVANLLHNRKDVVTLVEPLGAAAAGAAAAGPAGGGAAAAVEDQAEGVRTVELRRPPLEHDIERLLIEEVAARHRAFFGKAA
>CRv4_Au5.s1.g1947.t1
MVLGIKTVASFVSKPFRRGGKSSRLEASSREPMTQAEIEDLVLKLNKIEAVKFGEFKLKSGLISPVYVDLRVIVSYPDVLEQVSRMMWNAVRGCEYDIICGVPYTALPIATCMSLGYGEAMVMRRKEVKDYGTKKAIEGAYKAGQRCLIVEDLVTSGASVLETLEPLQNEGLIVKDVVVLIDREQGGEAHLAKNGLALHAAFKLSAMLDVLTRNKLVTEEVAAKVRKFISENQTTLPSAGAAPAAAPAAAPAKPKRLPYEQRIPLAKNAMAKRCLEVMVRKQTNLSVAADVDTAEEMLALADKVGPYICVFKTHVDIFDKWDVSIANKLTELANKHDFLIFEDRKFADIGNTVVSQYAGGIYKIADWSHITNAHLVPGPGIIDGLKTVGLPKGRGCLLL…
>CRv4_Au5.s1.g1958.t1
MSESKDQLKEKLKADPSFRAELKDRIKNALLSKVPASVPISYNFDSYMLTEVQPGQLRVLEVDERLVLPTNTLIRLLVTASDVLHSWAVPALGVKMDAVPGRLNQVWMSINREGVFYGQCSELCGANHSFMPIVVEAISPRQFLTEYVKKWIS
>CRv4_Au5.s1.g1960.t1
MQTMLNPQSTLKLSSYRLGRPAGRPVPCHATARTRTRTHAGNSDSDNVSGTYESGSASDSEASTSGAPNPNLKLPKIGYFSIADTKAEVYSRAGEKFDPAKKGGRYKPEFIWNTDWQTALEREESLRRKQEEAKNRPKEPTTGFLSFSRLAELDRMDVDLSDVLARKRQEEAELKEALARQVQLGAGNGGKAGGSSAAARKPPPAAAPSGKVATAAMFTRKESAKLSRTSRSSARTAVIVEVPALDAEKARLAEEERIRYDALKVEQQLWTLAFTAAGFAMTYTTYTKDVAFSYLVGALGGFAYLRLLSKSVDSVGGEGGLASGVNSVASQPRLLIPIILGLGYNRWNQLYAEQLGVTLELLPILVGFFTYKLAVITRQYKDVFDGNL
>CRv4_Au5.s1.g1969.t1
MQTISGRSVAGRSTCSARVALRARKVCVTRAAATVEKHEEKAIGSAWQFTQPAGKGLGFYTGAEDGYLYCDQMRVEDIRNKVPESPFYLYSWNRIAHNYAEYKKALAGLDNLPCYAVKANNNLVIMKQLAAAGAGAVLVSGNELKLAMKAGFDPKRTILNGNGKLPWELELAAEMGVNINIDSEFDLENIAAAARKTGKKVSVLLRINPDVDPQVHSYVSTGLASSKFGIRNSHIKWFLDEIRKEPLLELVGVHSHLGSTITKVNIFRDAAVIMCDFVKMIRAEGFQLKYLNIGGGLGIDYSHQGQVLPTPTDLIDTVRDIVKELGLTLVIEPGRSMVATGSALVNTVTGVKTNGNKNFIVIDGSMATLIRPSLYGAYQHIELTKPHSTPVQTFDVVGP…
>CRv4_Au5.s1.g1986.t1
MAATMQMNKQATRQAAQQGRVAPFKATGVVRKVAQLPSSTFSGVTVPQRQFAVSGARSVSRAVQSVFAVKDGAALEGRKLRVAVIGGGPSGACAAETLAKGGVETFLLERKLDNCKPCGGAIPLCMVEEFDLPMEIIDRRVTKMKMISPSNREVDVGKTLSETEWIGMCRREVFDDYLRNRAQKLGANIVNGLFMRSEQQSAEGPFTIHYNSYEDGSKMGKPATLEVDMIIGADGANSRIAKEIDAGEYDYAIAFQERIRIPDDKMKYYENLAEMYVGDDVSPDFYGWVFPKYDHVAVGTGTVVNKTAIKQYQQATRDRSKVKTEGGKIIRVEAHPIPEHPRPRRCKGRVALVGDAAGYVTKCSGEGIYFAAKSGRMAAEAIVEGSANGTKMCGEDAIR…
>CRv4_Au5.s1.g2006.t1
MALRRAVASFLPKLAGAAETLPAASHAASSFSQLICTPLDVVERQQQPSGFRSFASDAVEVFKPETGLTPTNRLSMAPTPYIKYDEHNHKRFPPGTEGRPFAYFVQTGGRFLYASAARLAVLKIVMSLSAAADTMALSSLEVDLSGVEEGTTITVKWRGKPVFIRHRTDAEIAQSAEVALSELRDPQKDVDRAINPKYLVVVGICTHLGCVPISGAGNYQGWFCPCHGSHYDISGRIREGPAPYNLEVPEYRFTEGQKVVIG
>CRv4_Au5.s1.g2028.t1
MMLSGRTCNHAFSTRQMSHQRGALALRSARVAQRPVTCRRAPFVPSAVFLQSEPAQKTASSANNGDAAPSEARTVPSERALAIWRSADAVCFDVDCTITINDGLDLLAEFMGVKEEVEELTNKAMDGTMSLTRSLEERLNLINCSPDDIRRFIKAYPPQSRLAPGIKELIKALQKRGVAVYLISGGFRELLLPIAAHLGIPKDRVFANRMHWQWDDETGMPTKLVGFDTSEPTARNQGKPEAIARIRENNPYNTVVMIGDGITDLEAVQTSGGADLFIGSGVVVEREAVVAEAEWYVYDYKALVSALSRYKVAMVGSGAWACAAVRMIAQNTSQDDPEDEFDDDVRMWVHQGGELVDTINSTHENPAYFPGIPLGPNVIATGNLAEAVADADLLVFCAP…
>CRv4_Au5.s1.g2031.t1
MPTEVEQKTGTTSNNGNVTPLEARTVPSERALTIWRSADAVCFDVDCTITVNDGLDLLAEFMGVKEEVEALTNKAMDGTMSLTRSLEERLNLINCSPDDIRRFIKAYPPQSRLAPGIKELINALQKRGVAVYLISGGFRELLLPIAAHLGIPKDRVFANRMHWQWDDETGMPTKLVGFDTSEPTARNQGKPEAIARIRENNPYNTVVMIGDGITDLEAVQTSGGADLFIGSGVVVEREAVVAEAEWYVYDYKALVSALSRYKVAVLGSGAWACAAVRMIAQNTSQDDPEDEFDDDVRMWVHQGGELVDTINSTHENPAYFPGIPLGPNVIATGNLAEAVADADLLVFCAPHQYIRGICKQLMGKVKPGAAAISLTKGMRVTPEGPELISQIVRRTLGVD…
>CRv4_Au5.s1.g2037.t1
MPHDSDEEDVDVRASGSAAGVSWGMGGGTAGPSPSELRMMGAATSVSFKKSTMKQGVLRPLSTLPPFVPRLFIEDITLNHEKYRGFDAAGRDLTAASKTLQPSIIELQASVMIADVTGFTKLTEILSKKGTSGVELLTTCMNNYFTRAINMIMAYEGDVVKFAGDSMICLFYPNEHERRHPDKGLRACTLRMVACSHQLATKLGHMRMKMNGQVEPAPPPTPDPTPPLPAQPSNLLSSPLLSAPPGLGAGPSGEAEPVDGVAGTDGLRHNSGPMSGAAAAMGRRLGRDSPRSSATNQPLGVPGAGMGDEGSPSTADTSGRGGDDAAAVARKRGKSWSLMANLLKGTRGGGRKSEAAMTPASMSPAGSSGPSRASFDKGEKPGTSRMSARERAKTETGLG…
>CRv4_Au5.s1.g2057.t1
MLSMLGRKGQAMCLRSSRQVPSTRASIARLLAQTPRPNVRANALAGTAPGTSTSGPAEPIKDPIPYANLVVGVPRENAPGERRVALSPAAVAGLLKQGFKTIVVEKGAGEYSQFTDAEYASAGATLVDSTEAMGADIVLRVRPPALEEVNKIKEGAVLVSYLYPARNKELVEALAKRRATAIGMDCIPRTISRAQMFDSLSSMANIAGYRAVTEATQHFERFLNGQITAAGRIPPAKVLVIGGGVAGLAAVGAAKSLGAIVRVFDTRTAVKEQAKSMGAEFLTVDIQEEGESGTGYSKEMSPAFIEAEMKLFAAQAKEVDIIITTALIPGKGAPLLITKDMVDSMKPGSVIVDLSAEAGGNCGYTKPGEVVKTPNRVTVVGYTDMPSRMAGQSSTLYAN…
>CRv4_Au5.s1.g2088.t1
MVHTKDHGSVRAEVADLFRSALNTAYPNAGIEPVVAACNNAKNGDYQCNNAMALFGKLKGTENAPKAPRDVANAILAALPANDLISETSLAGPGFINIRLNKDALARRVGSMLTDGLAKFAPEGHAGKKVVIDFSSPNVAKEMHVGHLRSTIIGDTLCRVFEYCGSDVLRLNHVGDWGTQFGMLIEHMADTRKARVAAGGEDADKDEDVADLQELYRAAKKRFDEEEEFKTRAREAVTRLQSGDATSLASWQRICAASRREFEALYTRLGVTLQERGESFYNPMLKGIVDGLKETGVATIDDGATCVFVEGQSVPLIVQKSDGGFGYASTDMAALHHRLNEEKADWIIYVTDVGQSQHFELVFGAAKKAGWLKEAAGPKVSHVGFGLVLGEDGKRFRTR…
>CRv4_Au5.s1.g2116.t1
MSTGVVAAGAAAFALYVYLKQKGGVQDGEFEPALPQELSRNAPDHAPNNWGEAFFHVKEVLRYMINETLGKWHTIDFFVGLAYLSNREALEYPAADICGKGINVLRSDLTMTEQLKLLLELQEVRRYMLYCKGLKQRREEAQARFWREHLGADTLSILKQQPTAGVLRPAYVLVADHVLRCVVLCIRGTHSTKDLFTSLAGTAKPHHVVDPSLPGGLVLGWAHLGMLAAARWLARQVAPELRQALAEHPGYELRVVGHSMGGGTAALLTMMLRSGVGGTTGGASSSTAAAPGTHGDSPADCAHAASTHPAQPSDSLMDAAGTGPGTSTGTTPREPPPPPPPPAYSPHTTHTAPPPPARDDPLRTARCVAIACPATVTPELAAACGGFVTSVMNGTDIVP…
>CRv4_Au5.s1.g2118.t1
MAVSQRALVAKSSGTAPQAHALGLGLRSGAALRPRRASRAPASSSSPLAPRASLIPAAPPPPAATSPATASVPLSNGGLGGPAAGAGVLPGPPSGPITGAALGELVRKFKRLQNGSDIRGIALEGVPNEPVTLSAGAVFFIGVAFARWLRSKGHSAPKVSVGRDPRLSGPLLESAFAAGLIHGGAAVVHLFGLATTPAMFYSIVLSGGASNGPASPAFFSTANSVASAAKRAAPLSADGTGAPPPAAAAGGGGGTNTMLPPPPVPPASELTAQPYTGAVMLTASHLPYNANGLKFFVAAGGLDKPDIAELLQTAAAAAAEAGVNIGDPVSEQSHLLAVSLSLDPARLARLPFLPTYSASLRDLIKRGVNSPANYHFPLLGCHVVVDAGNGAGGFFAEQV…
>CRv4_Au5.s1.g2123.t1
MSVQTIPGVAILGPVTAEQASILSPEAQLFVATLHRTFNPRRKELLKRRDERQKDLDAGRLPDFLPETAAVRADPGWKCAPPAPGLVDRRVEITGPVDRKMVINALNSGATQYMADFEDSHAPTWDGNLEGQVNMRDAVRRAISYTGPNGKVYSLRTDGKLATLLVRPRGWHLVEAHFMVDGEPCSASLFDFGLFFFHNAAATLAAGQGPYFYLPKMESHLEARLWNDVFNASQDMLRLPRGTVRATVLIETLLAAFEMEEILYELRDHSSGLNCGRWDYIFSFIKKLRNHPQFVLPDRSAVTMTSPFMDAYVRLLIKTCHKRGVHAMGGMAAQIPIKDDPAANAAALAKVRGDKEREVVAGHDGTWVAHPALVPIAMEIFNKHMPTPNQLHVRRDDVT…
>CRv4_Au5.s1.g2142.t1
MAADTFAFRGTFFHTPAYGQLEALRDAVVVIQDGKIARLGTSGDEAALMREFGLSEVRRLKEGQYFVPGFIDTHVHAPQYKFTGTGTDIALMDWLKKYTFPAEGSFRDLDAAHHRYALLVKRFLANGTTTAMYYGSLHLEPNLILVDTIERLGQRAVVGKVNMDRHSPDDYVEATSDGIRDAEEFIKYTQGKKCTRIEPCITPRFIPTCTPELMKGLASLAQKYGTHIQSHISECCGEVNCVREMHPEYASDAAVFEEMGMLTSKTVMAHGTLLSDDDIKHLASRGTAVSHCPLSNFFLGDAFFKVNHALSLGLKVGLGTDVAGGIQPSMLSAQRMAVVNSRCLRAHKLAVSGGTIVTPEMEKDVITFKEALWLATVGGAQALNMEDRVGTFAVGKEFD…
>CRv4_Au5.s1.g2163.t1
MSDAAASATPAAAAEELQSKLNVDAAPAEAAAEPPHPSGMTLDERYKLARSVGEECINEEELRALLAKKPNVVAYDGFEPSGRMHIAQGVMKAINVNKLTKVGCTFKFWVADWFAQLNNKMGGDLKKIQTVGKYMVEVWKAVGMDLSKVEFLSSSEEINKRPDEYWTLVMDIARKNNLKRIVRCSQIMGRTETEELSAAQIFYPCMQCADIFFLKADICQLGMDQRKVNMLAREYCDDIKRKLKPIILSHRMMPGLLEGQEKMSKSDPNSAIFMEDTEAEVNTKIKKAYCPPKVTAGNPCIEYVKYIVLPWFGHFQVSRPADNGGDKRYEDAEELAADYESGALHPGDLKAALSRHLNQILQPVRDHFENNAEAKELLKKVKSYKVTK
>CRv4_Au5.s1.g2164.t1
MLNLQHSARAGPACRSRATTRKLCVSVSAAGSTYGNNFRVTTFGESHGKGVGCVIDGVPPRLAITEDEIQLELDRRKPGQSIITTPRKEDDIAEILSGVVDGVTLGTPIAIVVRNKDQKSQDYSEMSVAYRPSHADATYDFKYGIRAVAGGGRSSARETIGRVAAGAVAKKLLKVIGDTEILAYVSKVRDIGCSVDNGAFTMADVESNIVRCPDQAAAHKMIDAINEVRTRGESCGGEVTCVVRRCPKGLGSPVFDKLEAELGKAMMSLPATKGFEIGSGFAGAAMLGSEHNDEFYIDEQGRVRTRTNRSGGVQGGLSNGEDIVIRVAFKPTSTIGIKQNTVTRDGQETELRARGRHDPCVVPRAVPMVESMVALVLADQLLQHFAQCELLPRDGAVGA…
>CRv4_Au5.s1.g2185.t1
MALQCKRVAVGTSGRRAMDVRAQAVASPAPASAPMKTNVAKIAVLGASGYTGAEVVRLTALHPNIKVTVLTGDKQAGKAFSDVFPHLVAATNVPKLVKIDDVNFADVDAVFCCLPHATTQEVIKKLPSDLKVVDLSADFRLKNPATYAEWYGHEHAAVELQKEAVYGLTELYRDQVKSARLLANPGCYPTCSQLGLYPLLKAGLILPEDILIDAKSGVSGAGRSAKESNLYCEIAEGINSYAVGSHRHMPEIEQGLTEAAGKPVTISFTPHLINMSRGMQTTSYVKLAPGVTADQLRSQLASTYEGEPFVRVLPKGVVPHTRHVRGSNYCLMNVFPDRIPGRAIVISVIDNLVKGASGQGLQNLNLMMGWPETTALLQLAMFP
>CRv4_Au5.s1.g2188.t1
MKKAAEITGAAESAMGPKEGGFTAGVPLDTFTRKARIYAPARTASQSGLARTVDFATTTPAWKIEFEPTAKWQNPLMGWTSSADPLENVGRSALVFYTKEEAMRFCEKLGWEYEVTEPNKRRTQRTKRYMQYGDNFGTKRAGVPDLSTLPSNRAAAK
>CRv4_Au5.s1.g2199.t1
MRRQAAQRLVAALFALLALLFGVLIVSAHAQAAAGADVSESVPNLLSLAGIARAWREFWAIVGPGGKLHPAYFLEHKGHLVIEAALIVVIVYLALQHSFKVHPRAEDPLTDKEIDQLCKEWTPEPLVPTLPESERIEPTVITGIDGPYVYVQGRKEKVLQMAASNYLGMAADKEAKDVSVAAVDKYGVGSCGPRGFYGTIDVHLELEEELAKFYGTEAAIIYSYDVATVASIIPAVTNRKDIIVCDEFCSYAVQAGYTVSRSRLRTFKHNDVADLERVIQELEAEEKAKRRPLCRKLIIVEGIYANYGDLAPLDRIALIKEKYKYRLMVDESHAFGVLGATGRGACEHFGLKPEQVDIIAASMSHAMGSVGGFCVGDRTIVDHQRLSGSGYCFSASLPP…
>CRv4_Au5.s1.g2200.t1
MGLLVDRFGKPVAFREGVAAARKIIVQVAISSVANQDGQGISLALLGTVTDQLQLLASLGYELQLVLSGDKATCDKAAHAVQNLLKLKEPVVTVPVEHGGEEGRLAEAAVKAAAAKLLVYLSASKGVEAADGRVARVYQPPAGATAPPPTAPGLVGAAWALSGGCKCPVVLASMAEQDVLLRVVAGQDVGTVVDPAAAEAAGGSKAAATASSARDMAVRARTASRQLQALSSEERSQLLLKVADALLAAQEDILKANARDVQEAQGKITDSLMQRLVLKPAKIAQLAEGIRAIAAQEEPLGRLLRKVEVAEGLILDKVTVPIGVLLVIFEARPDALPQIASLAIRSGNGLLLKGGKEATHSNAALHKVIVEALGPMGSDLIALVTSREEIESLLALDDV…
>CRv4_Au5.s1.g2204.t1
MLWCDTAGIRRCRVIPSQRYKRALSQGVCITTACMAMPAYGDSPVAASGLSAVGEARMVPIECTRVALPWAPGHHMALVEFDAPKSDGPWECCPRRALRNTVKMMEENFGLTMKVGFEIEFLLLEPVPGSGAAAGAAGAAAAAPRCAGAGGELYGTGWRPVDNKLYCQSSAMDRSAAVLDAMVAALEEMGIPVEQWHPESAPGQFEVVLAYTDTVAAADRLLLAKEAIVGVARSHGLNVSFLPKPVRNAAGSGCHMHLSLWKNGVKCMAVTDGGSFSAAAACVTAAAAGTFRIPGGADAKAASSTTASSGRGGGSSLAPTAAAAPGSAAGAGGDVFHDAPDMDPTSSSIQRQQNQRPEESAEERPVLVGGAPVPSNEHMHFLAGLLAYLDVLLPFTSPS…
>CRv4_Au5.s1.g2234.t1
MLPALARTARHHGLFTKVGVRGFASQVSEMTVRDALNSALDEELARDDKVYVLGEEVGEYQGAYKITRGLLQKYGPDRVKDTPITEAGFTGIAVGSAFAGLRPVCEFMTWNFAMQAIDQIINSAAKTLYMSAGQINCPIVFRGPNGAAAGVAAQHSQCFASWYSSVPGLKVLAPYDSEDARGLMKAAIRDPDPVVFLENEILYGQAFPVTPQVLDKDFVLPIGKAKVMREGKHVTLVSFSKMVGYCLKAAEQLAKEGIDCEVINLRSIKPLDRDTLLASVKKTHKIISVEEGWPQCGVGSEISAVMMELAFDELDAPVLRVTGAEVPMPYAANLEAAALPQIDDIIKAVKSIA
>CRv4_Au5.s1.g2264.t1
MEPSTSTSSAPSSTQFLRKHILKLAPYTPIEPFEVLSSRYNRKPEDIIKLDANENPYGPPPEVREALATMPFPHIYPDPETRALRRALAEMHNIPMENLLVGCGADELIDLLMRCVLEPGDKIVDCPPTFTMYVFDADVNDARVVTVPRLDGFRIDVEAVKRAVVEHKPKVVFLTSPNNPDGSMISEADLVSILDLPVLVVLDEAYIEFSTEASRMHWVLQRHNLIVLRTFSKSAALAGLRVGYGAFPIGMMEYMWRAKQPYNVSVAAEVAACAALTNMNYLNTVRDALVSERERLFARLKEIPFLEPYPSHANFILAKVTNGRDAKAVKDALATQHGIMVRHYAKKELSGFIRVSVGRPEHTDKLIEALKQL
>CRv4_Au5.s1.g2299.t1
MSLWTDYTWIVVCGALASFFTAYGIGANDVANAFGSSVAARTLTLRQALLIAAVCEFSGSVLLGGQVTRTVAGGIARLSTFERVPELYMFGMLCALVASGTWLLVATYLELPVSTTHSMIGAVLGFAFVYGGVEAVVWMQPTDRFPFMSGMVPIVLSWFTSPLLCGLATAALFVVLRSAVLRRENSLQLTYVLLPILVLLTVFVNCFFVLNKGASRELTWSIGQCAWVSAAAAGGCSLITVVALVPLLRRVVGKEEEKRSRRRLQLYRAASRGVDDAAARGSAGTGGTGAPATRSSSAAQKHGSHRVSGGALDPAPTGDDFAAGGGAGGDSGTALLAPPPAAVVAANHGRDGGGNAGGDWGRQSQQHQQQHQHSGYGPPQQYDGQAGTAMQLHAVLRHS…
>CRv4_Au5.s1.g2309.t1
MVSAEVARHRTHDVIAGFGVTLHSDPWPMFAHIPVAVALVPVLVLLLRVAIWRSHIQANLNAGGAHEHRAQLGLAEVRRRMVSCVVALLVTTGLWAFSLQALHFAANAVRKPYPDNLAGMSAGLAQLLTAASSGTASATSAAAASSNDLASFLASSSESGNGGSGSWTPGGGWAPGAKWGPSTCPPNCLDLSAFKSYFGPHVCCCNAIGGVFAAEPHAAAALQALIPALVGLALLWAALSWLLLAAAAQFAHSESELLTITPATAAAAAAAGEPGNLPPVHGLAGLLARHWLGGCRSGPDARTSSGKPRRVGDVTEPLLAGADCGTAAMPIVSGAGVVPQASSLASVHAWAQAEQGGAAAAAEGTSAAAAGADEGAVAAAAVDKGSGWGPDWPGGACPP…
>CRv4_Au5.s1.g2318.t1
MMLKGQTPASRCAVQSRKQSGQTLVSSVRCSTSASSCFIAPFGGSRLSSSVTQNVQLASRARQVRSALVVNASTTAPTKLDNGSVSVVLLAGGVGKRMGAAIPKQYLELRGQPIATYSLETFAHMPEVGEIVIVCDPSWRDVFEKRFPGLPDHLKFKWALPGAERQDSVFNGLQQVDAGAAIVAVHDSARPLVTAADALRCMLDGASIGAAVLGVQVKPTIKEVDKSGMVIQTLQRSKLWEVQTPQCIRPALLKEGFDLVKRNNLEVTDDVSIIEAMGKPVKITPGAYTNIKVTTPDDMAVAEKFLDEHKAAAKQPVAA
>CRv4_Au5.s1.g2332.t1
MLLTTCPLLYARPLPVLPVPNPAMHRSSSCSTSTPGGGAPSGKPRIWTAGRRRNLTTAAAASSSFSAPGRPGGAANSDDEDSPNWGPGGSGSGSGSGSDGEGGRLDGSSSSPVVLTTQDEDTISSIITGLSAGSVSIIRLSGTEAVPIALKAFRPGGRFRIGWSPASHRVYYGTAVDGDENVLDEVLLLVMLSPRSYTAEDVVEFHCHGGGVCAARVQRALIEAGARPAKPGEFTLRAFLNGRLDLAQAESVSELVGARTAAAADSALAGLRGGVGSAVSDMRRQCLDLLAELEARLDFDEDLPPIDVPALKSQIEAIQAGIEKALRTARAGSLLRRGLQVAIVGRPNVGKSSLLNAWTNSDRAIVTEIAGTTRDVLEAQLSVGGVPVTLLDTAGIRDS…
>CRv4_Au5.s1.g2332.t2
MSGPRYFCPPRRPPGLSAGSVSIIRLSGTEAVPIALKAFRPGGRFRIGWSPASHRVYYGTAVDGDENVLDEVLLLVMLSPRSYTAEDVVEFHCHGGGVCAARVQRALIEAGARPAKPGEFTLRAFLNGRLDLAQAESVSELVGARTAAAADSALAGLRGGVGSAVSDMRRQCLDLLAELEARLDFDEDLPPIDVPALKSQIEAIQAGIEKALRTARAGSLLRRGLQVAIVGRPNVGKSSLLNAWTNSDRAIVTEIAGTTRDVLEAQLSVGGVPVTLLDTAGIRDSTDVVERIGVERSQAAAAAADVVIMVVDSAEGWTDADTEIYRSLWGDGPGSSGCRVRGPALLVANKDDLRAAGPASGGATASTDEHAPLPLPVLARETFSATVRTSASQRKGLES…
>CRv4_Au5.s1.g2348.t1
MTGAKDVVTLVPGATHAGAGEAPFVRTSFQNDMRTSFGRSSATDGPMKVDAAVPPALAAAVQPIDRGPAAAASSLGPAASQELSRAMLSSWQYRVSGKAAVAELLQECAAEHIACGGPRGVEEVAVRHIRRHDIDSDSIYVVDLASPFRLFKAWRAAMPRVLPYYAVKCYPEPAILKLLMALGAGFDCASKGELDMMLKLGVSPGRIIFAHPCKRGADFRYAREHGITYTTFDSSSELHKIAEMDPEFKCVLRIRADDPGARVPLGLKYGAEVEEAAGLLAEAKQLGLEVVGVSFHVGSAAKNLATFTNAIANARKVFDDAAGMGFKMELLDIGGGFTGHFDECGNVMFGEIANTINAALATYFPPGGDLGDVRVIAEPGRYFAETSSTLMTVVIGQRD…
>CRv4_Au5.s1.g2380.t1
MLQRRPSGNKLVESAAKTQEGFQTAGNSTQVTLNEIAVREFHDALSRDDEMAFAVAAIMALTAVIKRSTAATLMGMSKELEDAAQALQRVNPTNISLKAGCELFLRYTTRTSALELKDIETAKARLIERGLHFAETSTRARQTIAELGSRFIRSNCTVLTHGYSRVVLRLLQQAFSSGMQFSVIVTEGRPDGTGITMAKKLDAENIPVTLVLDSCVAYIMDRVDMVLVGADAVVENGGIINKLGTYGIALAAQAASKPFYVAAESYKFARLYPLGQADLPEERKPLDVGPMLPPRANVINPSRDYTPPQCISLLVTDLGVLTPAAVSDELIQLYV
>CRv4_Au5.s1.g2400.t1
MAKEEVQDKYGVVYFIFVLLGTGTLLPWNVFLTEKEFYDVRLHVPPFNGYITENFMSVFCLVFNTANLVALGFLVKFQKHLSLRVLVLQPLVITFIMLLSTAALALRTEIPGDLMAKFTLPSLGLMGLCMAFLQGGTMQLASIFSISHIRGVVSGIAVGGLVTSSLSFVSQLRAQGAAAAGGGDEPQTAADVAPAAFSYFSASAAVIGACIAGYWSIPWLPYGRYKLLLAGIIDDPKERKMLTVDEDYEEPLLTVVEEPGGPSTSTGQTRSETTRAAIVSVESDYSLYSRTWQARNAFHIYCVSLFLCLCVTMSTHPGISSFICSVDNPARVSPCAAHNGKPGLLGRIQGDLFVPLLFVLFSLGDFLGRFLSGYGPWSTGAPKPLSILVYAVFRCGVAA…
>CRv4_Au5.s1.g2412.t1
MASNAPDEPSRVARPGLTSVRKIFLTRHGESQYNQKGLIGGNSSLSERGEKYARALPGALLERLSVDTQDEPLSVAVWTSTLKRTIETARSLPFPKLRWKALDEINAGICDGMTYEGIADKYPDEAAARKRDKLRYRYPAGESYMDVIQRVEPVIIELERERETVVVVAHQAVLRAVYAYFMNVPPEDIPRLAMPLHTLIELTPMPDGTMGEQRFPVDIDAVPPPPPVAELAAELVSGGSGVELLAGSAPSTALPASSGSPRSSRHSGAALQDCVTDGDACLPLAPASPEPTAAGDAEAAPVGALPVS
>CRv4_Au5.s1.g2413.t1
MPPTCADTERGLGLEEADEADADAATGLASAPSGSAVTGAVEALAAAGPLGSSGGAGGTTVCEGEGAGAGPGAAVGGARARGGGTVVRKNKLIIIMVGLPGRGKTFLCNKIVHYLNVTTHTTTVSYAQWLGHATRHFNVGAYRRIQKGAHEVQSAAFFDHTNEAGMEARNRALNAALDDLMSWLRSDSGQVAVFDATNTTESRRNLLRSKFHGQFQYLFIETICSDPAVLEQNYRNKMKYSPDYKGVDVDQAVADFLARIAKYEEVYEPIADRNLHYIKLTDMVTGRGYMDINRISGYLPGKIVFFLMQLSELLTTDHT
>CRv4_Au5.s11.g2419.t1
MDDATRRLRVVSGHFNVEKPAAQQMRAPFDVAELQRIIDHDNHEHRQAMKDFMRNDDVYVPQYDISLAEERELALQRLRRICRAGFISVTDFRENPFRIFAAHEVAAMCDPSMATKMTVQFNLFGGTVLKLGSERHHGPFLRQIDMFDSVGCFALTELGFGNNAVEMQTTAVYDAGTQTFVINTPGSLAQKYWITNSAVHAQWAVVFAQLWVGGRNEGIHGFLVRIRNDDMSVCANVRVEDMGHKMGCNGVDNGKLWFDNVRVPREALLDASSSVSPDGAFASSVAKPRDRFLRVADQLLSGRLCIASMMQSGSKLALTVAFRYAASRLCVGPAGRSDTPILDYQLQQRALVPLLARTVALAVGLNYVKERWAAASGFVPGQNVDPVTATEVVVLCCAI…
>CRv4_Au5.s11.g2423.t1
MLRTSITQSARCAGAATTSGRPFGAAAAAATAGRRPGAVTAGAVAEAVQTLTITRPDDWHLHVRDGQPMRDVVPHTARHFARAIIMPNLVPPVNTTQAAIEYGKRISAAVPAGVDFTPLMTLYLTDRTTPEEVYAAKAAGCVAFKLYPAGATTNSDSGVTDLNKPLAALKAMAEAGVLLLVHGEVTDPEVDMFDREAVFITQKLLPLLDKVPQLKVVMEHITTKDAADFVASAPANVAATITPQHMLMNRNALFAKGLRPHNYCLPILKREKHREAIMGAAVSGSRKFFLGTDSAPHPKHAKESSCGCAGMFSAPVALAIYATAFEKAQALDKLEGFASFHGPDFYGLPRNTDKLTLVRSPQVVPESYAFGDSTVIPMWAGEQIPWSVQA
>CRv4_Au5.s11.g2426.t1
MQTKAFTSARPQRAAALKAQRTSSVTVRATAAPAVASAPAASGSASDPLMLRAIRGDKVERPPVWMMRQAGRYQKVYQDLCKKHPTFRERSERVDLAVEISLQPWHAFKPDGVILFSDILTPLPGMNIPFDMAPGPIIMDPIRTMAQVEKVTKLDAEAACPFVGESLRQLRTYIGNQAAVLGFVGAPFTLATYIVEGGSSKNFAHIKKMAFSTPEILHALLDKLADNVADYVRYQADAGAQVVQIFDSWASELQPQDFDVFSGPYIKKVIDSVRKTHPDLPIILYISGSGGLLERMASCSPDIISLDQSVDFTDGVKRCGTNFAFQGNMDPGVLFGSKDFIEKRVMDTIKAARDADVRHVMNLGHGVLPGTPEDHVGHYFHVARTAHERM
>CRv4_Au5.s11.g2503.t1
MPRVSAGESSEARTLEAAPTGALAISIPPESVVSNQSSSTTLGGPSVTNGSIAPVPWKPYREAFHTVAHTEYPGAGTEEDPFIVDWMDEDAENPMNWPSLYRWLMTLLVSVATLSVGFCSTAYAGSAGFITEDFGVSSEIVTLGISLFVLGFALGPLIWAPLSEVLGRRPLLIWTFAAVTAFNAAGAVAPTMTALAILRFFAGAIGSSPLTNAGGIIADMFQAEQRGLAMSLFAAAPFMGPVIGPIVGGFAGEALGWRWVFWLMTMFTGALTVVALALMPETYAPVLLRRRVAAVAKAAAAPAAAAAATAAATAPSSPPSPPPPAAVYRSKFDAKGVQPLPVLLATSLTRPWLLLFREPIVMLLSLYTAIVYGVLYMLFAAFPIVYQRGYGWSPGVGGL…
>CRv4_Au5.s11.g2513.t1
MTTPSKIHFATGNKKKLEEVNAILAAGAELPFEVVAAKLDLPELQGEPEEISKEKCRIAAKLVGGAVMVEDTSLCFNAMHGLPGPYIKWFLEKLGHDGLNRMLAGFEDKSAYAQCIFAYTPGPDTEPIVFVGRTEGRIVQARGPTDFGWDPVFLPDGFTDTYAEMDKTTKNTISHRYRSLDKLRTYLLSHAASK
>CRv4_Au5.s11.g2516.t1
MAVPRGFKWSGGVLDQAYEKCGQVTSEYAKTFYLGTQLMTPAQAKAVWAVYVWCRRTDELVDGPNASKITPKALDRWEERLEALFDGKPYDELDAALTDTAAKFPLHIQPFRDMIEGMRMDLVKSRYETFDELYEYCYRVAGTVALMCMPIMGIEPTYKGQLEPVYRAALALGTANQLTNILRDVGEDAYQRNRIYVPLDELDKYGISEKELLTGLHAPTTGAMDDRWRNFMHFQITRARQYFTDAEGGVDLLAPQARWPVWSALILYRQILDAIEANDYDNFSKRAYVPKWRKMVSLPVAYTRALMPARRR
>CRv4_Au5.s11.g2527.t1
MVEATESAEDTIPIVPLLGVTKPAESLTSPIDRRSDFYRHAALVVPHKPARQPLMTIPNVLTFFRLLLVPVLLLVWELQWHYTPTLCAVIFIAASVTDYFDGYLARKLKIATVFGAFLDPVADKIMVATALVLLAVSPPPPWSPQWLTAPVVLIICREITMSALREWAAAAGGGVSKAVKVNTLGKWKTALQMVSMSVLLVVRQPLGDLLPSYAGSPLWLHISLASYVALWGGTVLGLWSLAIYFSNVWVHFVYPEAKKHH
>CRv4_Au5.s11.g2553.t1
MEAHLKAPAVGKICRQGQVARALVPAAAGRATNAKRAAVTVMATPPEAPGAGTASAPGDYKTAAATTTTTTTTTGQTASNLVVFPSPAVVSSAGKPGGKMAPMDGNEATALIAYAVSDVSFIYPITPATNMGEMVDQWASEGRTNVFNNVMSVTEMESETGAAGALHGALAAGALATTFTCSQGLLLMVPNMYKIAGELTPCVLHVTARALAKHALSIFGDHQDVMAVRQTGWAMLCSHSVQEAHDLALVSHLATLRASVPFVHFFDGFRTSHEINTIHLIDNEAIKSILAKPIYQDAIKHHRARALNPTHPHQRGTAQGPDVYFQCAEAANPFYDRAYDHVAAAMEEVSAVTGRVYKPYEYVGAPDADKVIVLMGSGSAAVEEAVNYLNAQGKKVGVL…
>CRv4_Au5.s11.g2570.t1
MLSQYAGTLALGGRLVCQGAAAMSTQLARRYGGVPEGSFLSDKQKQLIEREDKFGAHNYAPIPVVLDRGEGVFLWDVDGKRYYDFLSAYSAVNQGHCHPKIVEALTSQAGKLSLTSRAFFNDVLGEYEEYITRLFGYDKVLPMNTGVEGGETAIKLARRWGYDVKGVPANCAKVLFARGNFWGRTMSAISTSSDPSSYGGFGPFMPGFEVIPYNDLGALQAKLESDPHIVAFMVEPIQGEAGVVVPDEGYLSAAHRLLKKHNALLIADEVQTGLCRTGRMLACDWEGVKPDILVLGKALSGGMYPVSAALARDEIMLTIGRGQHGSTYGGNPLAAKVAMAALQVLQDERLAENSDRLGGILRDRLAAIPSKMVKSVRGKGLLDALVIDESHGVSAYDVC…
>CRv4_Au5.s11.g2578.t1
MQALSARAPRVAAKPVSRSGARSAVTVVCKATTVRSEVAKKVAMLSTLPATLAAHPAFALVDERMNGDGTGRPFGVNDPVLGWVLLGVFGTMWAIWFIGQKDLGDFEDADDGLKL
>CRv4_Au5.s11.g2607.t1
MLIIHYVRKDHNYKGWGLHVWGDSSSCTQWQQPLKPTRVTERGLVWELPLRSGARRVGALVHKGEQKAASGEVTISAHGSTMSVDQATGAAVQEAWLVGAEQSAFAFPPDMSRIPAGSINKQAAHWVSPGLLLWRQAAEDVVGRRRFRLHYSRAGYMHITGAGVQGADASWDLEPQPPAAAAPGVKRFPHLYGCTALAVPPEAGAAAAAAEGGGILTGQLLVSVHDAAGDALDATGVQIQGVLDELMSYDGPLGDHPDVGGDGHSITLWAPTAQKVELLYWGSAPRGGQPQVHAMCRGPCGAWSLRRPAAWLWSYYTYRVTVYCPWTARMETVEVTDPYSRGLAADGGRTQVVDLEHPDTMPAGWHSHVPPALAQWTDISVYEMHVRDFSITDASVPPP…
>CRv4_Au5.s11.g2609.t1
MQTVRAPAASGVATRVAGRRMCRPVAATKASTAVTTDMSKRTVPTKLEEGEMPLNTYSNKAPFKAKVRSVEKITGPKATGETCHIIIETEGKIPFWEGQSYGVIPPGTKINSKGKEVPHGTRLYSIASSRYGDDFDGQTASLCVRRAVYVDPETGKEDPAKKGLCSNFLCDATPGTEISMTGPTGKVLLLPADANAPLICVATGTGIAPFRSFWRRCFIENVPSYKFTGLFWLFMGVANSDAKLYDEELQAIAKAYPGQFRLDYALSREQNNRKGGKMYIQDKVEEYADEIFDLLDNGAHMYFCGLKGMMPGIQDMLERVAKEKGLNYEEWVEGLKHKNQWHVEVY
>CRv4_Au5.s11.g2702.t1
MPSLRWLACSLLVALAAAAEDLSEEVLIGWKGETYDAGLTSLPKSTDASKNEAALKDIEAKAKAALEAEEGKAVGKANGTLAAAAPRTEPWVETISWNPRAFIHHHFLTPEEADHLVGIGSKRVSRSLVVDAQTGQSRLDDIRTSFGAAFGRGEDPVIAEIEERVAEWTHLPPEHQEPMQILRYVDGQKYGAHWDWFDDPVHHAAYLAEGNRYATVVLYLSDVEYGGETNLPLADAIDPEAQSPKGLSPCASAWGISVKPKKGDALLFFDMDIMGSVGDRRTLHTACPAIRGTKWTATKWIHNKPYMGEYDPLAAAARCADTAADCPQLAAAGECEKNMARMVGVTGMCRASCRDCRQCAAGDVLCQRYNMKSLVRARAMRAAAGVQAAAAAGQAAKA
>CRv4_Au5.s11.g2708.t1
MASLLARPQQAVVRAAKPAAARPLRLVVRASAQKPQQQLAQLAKPALSAIVANALMAMPAAAEAGKIFDFNLTLPVMAGEFLLLMVFLEKTWFTPVGKVLDERDNLIRSKLGSVKDNTGDVDKLVLEAETILKSARSDVSAMINTKKAAKQSELDKTYNEAKAKITAEVESSIAGLEQESASMLKSLDAQVDKISAEVLKRVLPEGVRV
>CRv4_Au5.s11.g2709.t1
MQSLSARQAAGEASTSRAPSSRSAAPARRTSVVCSASSSSNKEVTLLDYGAGNVRSVRNAIKKLGYTIRDVSAVQFHPEKSGATGLDILQGFLEPEAAVAARKAAAAAAATSSSSAAAAAAAHSPRGLAKRVIACLDVRSNDAGDLVVTKGDQYDVREKGDAREVRNLGKPVDLAARYFEEGADEVAFLNITGFRDCVMEDTPMLEVLRRASERVFVPLTVGGGIKALTDSSGRTFSAVEVAAEYFRSGADKVSIGSDAVDAAQAYYARGAQADGSTAIEQISAVYGKQAVVISIDPRRVYVSDPAAVPHATVQTSRPGPAGEQYCWWQCTVKGGREGRDLGAVELARAVEALGAGEILLNCIDNDGVGQGFDLELVDAVSRAVTIPVIASSGAGCPQH…
>CRv4_Au5.s12.g2758.t1
MASSTSSAMAKWAAQAARGFAAAAPSSGKGRKVAVLGAAGGIGQPLSMLMKMNSQVSSLSLYDIAGTPGVAADVSHINTKAQVKGFDKDGLAEALRGCDLVIIPAGVPRKPGMTRDDLFKINAGIVRDLVTAVGQHCPGAVLNIISNPVNSTVPIAAEQLKKMGVYDKRKVMGVTTLDVVRAKTFYAEKNGLDVASVDVPVVGGHAGVTILPLFSQATPKATMSAEVLDALTKRTQDGGTEVVQAKAGKGSATLSMAYAAALFADSCLRGLNGAPVVECTYVESTVTDAPYFASKVKLSTEGVDKIHDLGPLSDYEKAGLKAMMPELLASIEKGVQFVKGA
>CRv4_Au5.s12.g2759.t1
MAPQAKPMVGRVPGRSGSPCVVAAGEANGSPIVTGPISVNPSMSPALDPVAAAEAGKSAKAVDRSKGLWTRCDKCGTILYIKHLKEHHHICFGCNYHLKMSSMERINHLIDAGTWRPLDETLSPVDPLEFSDLKSYTDRIKEAQEKTGLQDGVRTGTGLLHGIPVALGVMDFTYMGGSMGSVVGEKLTRLIEYATQEGMPVIIVCTSGGARMQEGIFSLMQMAKISAALHVHQNCANLLYIAILTSPTTGGVTASFGMLGDVIIAEPQAIIGFAGRRVIEQTLQEQLPDDFQTAEYLLEHGLLDLVVPRSFLKGALYEIIDFYRAAPYKKRGMIPFGVQHGTFLTTEEKVRRRWAQWSRGGNGNGKDLAVAGDSSTVSYRELVSSYRTLVAGDAASSGS…
>CRv4_Au5.s12.g2763.t1
MQMQQQRMRFSRDARRIGASRVPLAKAAPGRKVVAQVATATAEKVDVKQAGSFDFNTYMVDRAKLVNKAMDEAVPLKYPETLNESMRYSLLAGGKRVRPALCLAACELVGGDIHAALPAACAMEMVHTMSLIHDDLPSMDNDDFRRGRPTNHKVYGEDIAILAGDALLSFSFEHIARATKGVPAERVLRVIMELGKAVGQDGLVAGQVVDIQSEDKEVGLDVLKYIHEHKTAALLEASVVCGAILGGADESTIEKLRKYSLNIGLAFQVIDDILDVTATTEQLGKTAAKDLAVNKTTYPKLLGLEKSKQVADDLIKEAIQQLDGFDAAKAAPLVALAKFIGYRQN
>CRv4_Au5.s12.g2771.t1
MAAPQAACRSTAMATAGDTQAAASNSSGTGTSTGGANDGGVVRILDLYSGVGCLHAALGRPGVLPPGCTQVQVAAAVDINTAANAVYAVEHGTEPRALDLTRVTAAQLDALCADVWLLTPPCQPYTTTTNARRKDTADPRAASLLHLASVLPSMRRPPSRLLLENVPGFAGSHSRRVLAAALAGCGYGLQEFLVSPHQLGVPYSRPRYFALAVRRPLRLPRRYDCSAGPVPHPPLLTPQRDTGAEPGAGGEEAELESRWAGVYDAGPRRAGDHGGSSSGCSSGNAGAAGQVPGPRRPLATPVHTPAPLSLFLQSAAPGQAALAAAAIATAANLGDGTPPPPPHEPQPPQPGAAGAHGEAAGAGGLAGDESDPWVSHAVPAALLGRFWRVLDVVTPTATY…
>CRv4_Au5.s12.g2774.t1
MKYIPHWLGRLPRREHTCTACFPALTSPATTLKLDVYYPRAGGADLGLGPPFPLAVFSAGFLLPADSLAGYAERLASWGYTCILYDRNETVASLLDDAACCLLLRELLDWAAADPLMRRLADPARQGVYLVGHSSYTCILYDRNETVASLLDDAACCLLLRELLDWAAADPLMRRLADPARQGVYLVGHSRGGKLAALVGAEDRRVRALCLIDPVDNTVYAPLRPGFPSALAALRNLPRERQLPLAVVGGGMGGDCAPREANFRRFFAASTSPSWEVALPDAGHFQFLDSMSALQRVVCPTGEVREDAVRDVAAAVMVAWAESMVRHRGADIFQLPVPYPEACSGSGGGGGGGGLDGTSSGTRSAALGGSGGGGSSSSSSYAASSSANSANTSSSSGSS…
>CRv4_Au5.s12.g2782.t1
MALLAQRSVNASARAGRPNRSRVVVPCIRAESGKIKIGINGFGRIGRLVMRATMLRPDIEVVAINDPFIDAEYMAYMFKYDSVHKTWPGHVNGSKDGFLVEGRKIHTFTESDPSKINWGAAGADIVIESTGVFTDIAKATAHLTGGAKKVIITAPSNDAPMYVMGVNHEKYNPATDHIISNASCTTNCLAPLAKVVNSKFGIKEGLMTTVHATTATQKTVDGPSKKDWRGGRAVNGNIIPSSTGAAKAVGKVLPELKGKLTGMAFRVPTNDVSVVDLTVTLEKATTYEDIMKALKEASEGEMKGVLAYTDEDVVSSDFVTDPASCTVDAKAGIMLSPTFVKLVAWYDNEWGYSNRVVDLALHVAKKAAVKV
>CRv4_Au5.s12.g2789.t1
MRNLQRFASALCGSVPGAGGSALPRLAAPVGVARSLSTLPNGLPSSVTIYEVGPRDGLQNEKKVIPADVKVAFIDLLSGAGFKAIEATSFVSPKWVPQLGDAAEVVARMRKAPGVEYPVLTPNMKGLAGALAAGCREVAVFAAASEAFSRKNINCSVRDSLKRFEEVVVAARKEGVKVRGYVSCAVGCPIQGAVEPAAAADVGAALHHMGCYEVSMADTIGVGTPASMERMLGATLAAGVPAARLAVHCHDTYGMAVANIIAAMRMGVAVVDASVAGLGGCPYARGATGNVATEDVMYMLDGYGISHGLDWGRVLDASEYISAALGRPNGSRAAKALLARRADAAEAAAEAKAKEPKAAQAA
>CRv4_Au5.s12.g2807.t1
MAVAMRSSTGLRATAARRQMPLGLGRVSTVRVCAADTKKAQVISPVNGDPFVGMLETPVTSAPIVATYLSNLPAYRTGVAPVLRGVEIGLAHGFLLAGPFIKLGPLRNVPETAEIAGSLSAAGLVLILALCLSIYGSAQFQSTPSIGVKTLSGRSVARDPLFSADGWSEFAAGFLVGGEAGVAWAYVCTQILPYYS
>CRv4_Au5.s12.g2822.t1
MSPVACASSAGSRCLAASRILRAAAGRCVPFQHSVVPPRPALWAPAVAVAAGQPAEPSGLRGGSLRTHCSSCPPGAAGSHQQQDYFTITTPLYYVNAAPHMGSAYPTIAADVASRFQRLLGKRVRFLTGTDEHGEKIAAAAEKRGMTPQAHCDDIVAQYTDLWGKLDIRFDRFVRTTESRHAALVVDVLGRCWERGDIYAADYEGWYCVDCEEFKDEKEMVALDGEAQPRGCPTHRKPCQHRKEANYFFRLSKYSKEIEELLSRDDFVQPASRRNELMSYVREGLRDFSISRAAVDWGIRVPQDPKHTVYVWFDALIGYLSGLLPEDVAPATSAVPAHGWPASVHVIGKDILRFHAIYWPGMLLSAGLPVPQKVYGHGFLTKDGLKMGKALGNTLDPQA…
>CRv4_Au5.s12.g2838.t1
MVKSVQSRDGANLYTVADHSGVHLPASCKQGACSACVCKVVEGNVKHTVDPACLTPRLKAEGYVAVCVANVSGDVSLQTHMGAKVRQARAEEADRMRHKHG
>CRv4_Au5.s12.g2840.t1
MTAGSQSVAKARPAIKQDRPSFHIAPPKGWLNDPNGPLFYAGYYHMFYQHIPESCIWSFGLVWGHAVSRDLVTWEHLPPAIVPTPGGLDADGCFSGCATLDEHGVPTILYTGVRLRSNGAAGPLPPVETDLQLPFIESQCAARPVDPSDPKLTHWTKIEYPWMALPPAHWGLGGWRDPYIISRPGADGSGCWSLIIGSGVKDNGGTVLVYKSKELLDGWQLHGELCHGRGEGSTTGFIWECPLLTKLPALPAHIARGGVVSHGNASRASTSESGDDMADTPHFFCISPDACTNPSYYWLGRYDTESMTFNLKGADGPFRLDLGDILYAPNTLEDTANGRTLLWGWNQEKRTKVGAYDYAGCLSVPRILWAEPSTVAAEPSSSSSNQSSAEPSRWALHQQ…
>CRv4_Au5.s12.g2861.t1
MLATALFVTYQASREYFGFMTSKQMSKGMPPPPRVVSVATTVMCMGMTVFSHFYRGKIGTLLAVASFALLVLQVVANKRPKFAQLASSLFGLFYCGWLPSFWLKLRNLALPAPDTPAAAFLTGITGWPTTVGLVAVLTAVAVIIAADTGAYFVGKSLGRTKLTDISPKKTVEGAAGGLAAAVATALGSWALFGWPGSPLAAVVLGVMVFFSSLFGDLIESIMKRDAGMKDSGDLIPGHGGLLDRFDSYIFSGAVTYFFSVFVLPFLNVLYGPGGLSAAITAGLAPLGA
>CRv4_Au5.s12.g2868.t1
MAAFAFGWATGANDVANAFGTSVGAKTLTLRQAVLLAAAFEFTGALVLGRVSTSTIAGGIASIDFFLRDPEIYAYGMVCALAVGFVWQGLASYWEMNVSATHAIIGAIMGFSLVYGGRAAVNWASPDPTSFPPYNGVVPIIASWFVSPVLTGAASAGLFALLRRAVLRRHDAAAWALWLLPPLVLFTTWINMYFVFTKGARKMLAEHHASAGGGKDWSDATSLWVSGVISVAAAAICALAAVPLLRRRAASHFAPGGGGISRDSSRSALLDGGAAAFIPLTALDAPGGGPGGAAETGTSSANHFHVSTHLRKVGAAARGGDNDGSVGGELGGGAGGAGGGGGGGGGPGDDLTPHGADPHRGHVYNYHHPSQHGSVQRSNRGSRTTVGAAGVGSGVAGIG…
>CRv4_Au5.s12.g2872.t1
MQALRNRVEAPCSTSSRSCSHVPVRRPATSRRALHIVAAQSTQPYWYSAKTITPPKKGKHFLHLDDFSRDELLDMLEKAKLCKAKFYTRDESFKPFAGQTMAMIFTKPSARTRVSFETGFFRLGGHALYLDPNTIQLGKREPTKDIARVLSGYNDVIMARLFAHADLLELAEYSSVPIINGLTDYNHPCQIMADALTLLERKGRVEGTKVVYVGDGNNIVHSWLRLATRLSFEFVVVCPPGYEPCQSTVEGARAAGLSSITVTSDINAVKGADVIYTDVWASMGQKETIDERKIAFAPYQVNEKLMALAGAQALFMHCLPAERGLETTDGVMESPQSVVFQEAENRMHAQNGILLHCLAATKNL
>CRv4_Au5.s12.g2885.t1
MQLNVAHHYCESINKTIRRPTRTVMIGKVPVGSQHRIALQTMTTTDTRNVQLTVDQVKKCADAGADIVRITVQGKKEAEACMKIREQLFKDKYDVPLVADIHFQPTVAMMVADAFEKIRVNPGNFADGRKTFDVINYDDPREFERERELIEETFTPLVLKCKELGRAIRIGTNHGSLSARILSYYGDTPRGMVESAFEFADVCRKHDYHNFVFSMKASNPLVMVQAYRLLAEEQYKRSWDYPLHLGVTEAGEGEDGRMKSAIGIGALLMDGLGDTIRVSLTEDPEFEMDPCKRLAGLGERAWGSGLGVAPFPETTRDTHTFTRRVGDLPVQAPGEDLDFRGALHRDGTVYNAVSLADLKQPEFLYKRLGAKLAVGMPFKDIATADSIVLSEVPAAADKD…
>CRv4_Au5.s12.g2898.t1
MSDSRALKDTQLMSPPRMQTRSSSKAGTPAKGTPAKGTPGKRKNDTVDPSPAKQNKGSNLRELFTSPRKRMLEEPLLDENPDRFCMFPIKYPQIWEMYKKAEASFWTAEEVDLGDDMKHWEKLSDGERHFISHVLAFFAASDGIVLENLAIRFMKEVQLPEARAFYGFQVAIENIHSEMYSLLLESYIKDPQEKHKLFHSIETVPCIKKKAQWAMKWIGSDSVFSERLVAFAAVEGIFFSGSFCSIFWLKKRGLMPGLTFSNELISRDEGLHCDFACMLFSMLNTRIDETRVKQIIVEAVEIEQEFCTEALPVDLIGMNSRLMAQYIQFVADRLLVSLGCAKQYNVVNPFEFMEMISLQGKTNFFEKRVGDYQKNGVMAGLQGKVQNFSMDEDF
>CRv4_Au5.s12.g2906.t1
MYWYDYAWILVVGCLAAFFTAFGIGANDVANAFGSSVAARTLTLRQALLIASVCEFSGSVLLGREVTRTVAGGIARLTAFDRAPELYMFGMLCALTASGVWLLLATYLSLPVSTTHSTIGAVMGFALVYGGPGAVVWLDEQSSFPYMGGLVPIILAWFTSPLLSGLATVCMFSSVRTGILRRENSLMMAFWSLPLLVLGTVFINAFLVLYNGANESRLHWPASRAAWVSACIAGGACLLTVLVAMPLVRRRVLLRQALVRDLALRRRQQLAYYVTRGSNAGKDTPAPTPAPGRSLGPYGSDSGPVPSAQHAGRSRSSTAGALGGTRGATGGGGGHGSGLVDGGADSPAQGFARHADLGPTAAAMGMGAAGAAFPLAAGMDPGLLLPVPAPSGHQQHSSQ…
>CRv4_Au5.s12.g2920.t1
MSKPAAAAKGLEFVVSKVDNVVNWARAGSIWPMTFGLACCAVEMMHAGASRYDLDRYGIIFRPSPRQSDAMIVAGTLTNKMAPALRKVYDQMPEPKWVVSMGSCANGGGYYHYSYAVVRGCDRVVPVDVYVPGCPPTAEGLLYGLLQLQKKIYRSKTTQIWYKK
>CRv4_Au5.s12.g2932.t1
MTSMYVLKRDGRQEPVMFDKITARIVKLAYGLNPDFCDAVLVAQKVAGGVYKGVTTSELDELAAETAAALTSTHPDYAILAARIAVSNLHKNTEKSFSKTMDKLYTYRNPRNGEEAALIAKDVYDIIVQNAQRLDSEIRYDRDFDYDYFGFKTLERSYLLRIDGKVVERPQHMLMRVAVGIHKEDIESAITTYHAMSERWFTHASPTLFNGGTPRPQLSSCFLLAMRDDSIDGIYDTLKECAVISKSAGGIGLSIHCIRGTGSYIRGTNGTSNGIVPMLRVFNDTARYVDQGGGKRKGAFAIYMEPWHADVFDFLDLRKNHGKEEARARDLFYGLWIPDLFMERVEADKEWSLFCPNEAPGLADCWGEEFERLYLKYEQEGRSRRVVRAQQLWFAILEA…
>CRv4_Au5.s12.g2944.t1
MSSVKRLLRSARECLGRKEYREALQHCKEALAEDKSCYEAYVFVGKAAFSLGEAPQAQAAYRRAADLDPANPLAWQGLAELAADTGAWSDAAEAYAQLLALADAAPPQDAAGLRSRRPAYLRRHAEAAARAGQLVAAEASWRALVEAATEAHQAAAAAAGGGGEAAAAALAAAEEELVECLCRLADVQLAADTEEIEARVAVRLAEEAAALAATTMTPEQAAALEAAVRGGVEGEWAEEALEADADHASASLRAIIALRPPAPPYVNYYNAFLKRLRKYIQAAAPGSMDRHARRAVLLAAAKATMEGRCGDRAGGCCDAYPYEAALAMLEVEHQVAGAEDPSLDPASPGPSPEPPQLPLLLADCRAVTARLAHAFPAAAAAQLHWALALRRRAAAVGFD…
>CRv4_Au5.s12.g2970.t1
MQAQLQSRQTARAGAFRSGARPVARRTAVKVDATLKVMIAGAPAAGKGTQCAKIVDKYKLVHISVGDILRDEVKNGTPAGKKAKDFMDRGVLVPDEVVVEMVKLRLAEDDVKQRGWLLDGYPRSASQAEAIEKEGIRPDVFLLINVPDELLVERVVGRRLDPQTGAIYHLKYSPPPADIVSRLIQRSDDTEDKCRVRVATHNANVDAVVGYYKDVKVDIDGTQSMQDVFEAICTALDETVAKSDPLEQYCKDEPAADECRVYND
>CRv4_Au5.s12.g2979.t1
MLAPNSIGPARGSAVSTSATSTPVASTSNAGAIRFRPCIDIHKGKVKQIVGSTLKDLPDSGSSGAAELKTNFVSDKPSSWYSELYRRDGLAGGHVIMLGADDASKQTALEALRAWPGGLHMGGGVTCDNAMQYLDAGASHVIVTSYVFREGRLEEERLKQLVKLVGKQRLVLDLSCRQRDGKYWVVTDRWQKFSTLSLSEETLAELAASCDEFLVHGVDVEGMQLGIDEELVRVLGEWSPIPVTYAGGARTLEDLERVRAAGGGRVDITVGSALDIFGGKLAYDDVVAWHQRQQQQQQQQAAAKH
>CRv4_Au5.s12.g3008.t1
MPLLRRAAQSLLTSWAPVATNCGAMSELVRCMGTERRPGESGAWKQIERQRYASDWENDPTFKRTPKNLAEVLDDSASMLLLTDVWRGMAYTLGAFFDKKVTIMYPFEKGQLSPRFRGEHALRRYPTGEERCIACKLCEAICPAQAITIEAEEREDGSRRTTRYDIDMTKCIYCGFCQEACPVDAIVEGPNFEFSTETREELLYDKQKLLENGDKWETEIATNLRTESLYR
>CRv4_Au5.s12.g3012.t1
MCRLMAYLLADIVLYPDRSIIKQSYDARERKIDPTLPFHLGHGNLNGDGFGIGWFNPDERRVQDPTPCVFTSITPAWNNENLSRLACKIVSPLVFAHVRAAYPGMPVSEQNCHPFQFSRYMWMHNGVVGGFAQIRRSLLETLSDCAYNAVASFHSDSAVSFALFLNHLPDVRSQQPPDVLIKAMQDTIATISAVQRRHGITATSLLNYVVSDGTTLIATRFVSPDSEGPASLYYAEGATFARAPPPPVPQPAPQQTQGQPGCTPCNGAASSGSSITQESSYELSFAAQGPAVVFVASEPITASASDWVAVPKNTALVVTREKGGFLNILRCPLVPQHPPLPSPTSTYLSPLPGNGTPPLPRRSSGGGGGTGGGGMTGLLVTIPSSGSGGAGGGLPYINP…
>CRv4_Au5.s12.g3028.t1
MWRSYSAAPQGSSPGTSLASLGPGSGVWGPSRASFEQFGDEDSNDGKGRHGGHGGHRAGHSRSPLGGDQSEKDEAYLKWQEKHPCVLAHFASFKAAVDGKRLAVFLDYDGTLTPIVSNPDEAVMSEEMRDVVRSVARAFPTAIISGRGREKVEAFVQLKELFYAGSHGMDIAGPRGGTNGCQVSGNEFVTAFQPAAHFRPLIDHIYTQLQERLKEVPGSSVEHNNFCVSAHFRNCPGEAWQDVISAVEELVAQHDDLRMTRGRKVVEVRPKVDWHKGTALSHLVDALGLAQEPDVVAIYVGDDHTDEDAFRTLEETRRGFGILVSTRAKPTRARYTVRDPACVKDFLSGIVEWSKSDSNGWRAKPCCNGWSMDGLAATGAGPEAPQQQ
>CRv4_Au5.s12.g3044.t1
MQCLNTKPFTSARPAVARRSVVAHASRPAQAAALASAMTVATTSAAMASEIAQTADVGSLTFAVGGVGAVVGLGALLVATDPQKRRSEQMKSFDGDEKEAVKDYFNTAGFERWRKIYGETDEVNKVQLDIRTGHAQTVDKVLRWVDEEGSVQGITVADCGCGTGSLAIPLALRGAAVSASDISAAMASEAEQRYQQAVAAGQGKAPKVAPKFEALDLESVKGKYDTVTCLDVMIHYPQDKVDAMITHLAGLSDRRLIISFAPKTLSYSILKRIGELFPGPSKATRAYLHREEDVEAALKRAGFKVTKREMTATSFYFSRLLEAIRE
>CRv4_Au5.s12.g3057.t1
MKAGLGNADGTSCPLCPLKVPSLDAPAIEVFNHYCSPRHSRGGSGNVASPARPRRGSVDLPSGAQGVSDDPLTPASPWWAHIPPHSDGDLSTRSAPLGGIAGDVLSPRQSNCYGPATPGGAGGSGAGPGARSRLAMGGGRHMQDQVMHDLLEARRLSRSKAGTPADLLLSMLSNMLLGLTPDLRDVELARTMLLRHADPYQPLNLDTQMREANLDADVVGLLMQQLGASGSTGSAAEEQAAAVQAAAAAVAGSPGAQGDQSPGSSEEVWARTSLETEAGKLRDALTLLLSLGRQPRGSSPLPSGCAALWEDEIGANASTADSASDTDGGVAPRPCQVVPPPVLDDVERALALADEWKYDTWHLAEVTKGHALSCLGFYLLHREGLISQFRIKPTKLLRS…
>CRv4_Au5.s12.g3058.t1
MSAARSARLMARIVRLLVELKGGARVAGRNIAQQTNGAAGGAVGRGLTKGATANTGMMKDLANGGRNFWSHMPKSPQLPGALSDAAHLNEDFHGGDHDDSEGDGSLFGGHLLEELAAMESHLLDWASLRTDTPADVLLSILSDMLDGREPDLREVALARSVLLRHLDLYEPLNTGGHIRAATDLDAEVMDALMHQIGGANSSSADAAGSRTRTTSLAMDDEGGSAALPGVDEPPVTAEALRSALALLLSRSGRTSDTDADAGPSGQSCSGSDSDGAARTRSDVPAPILDNVERALALADEWKYDTWHLAEVTKGHALSCLGFYLLHREGLISQFRIKPTKLARLLRSIEAGYADNPYHNSTHAADVLQTFHVLMRGAGLTTHYLDRVGLLAAYFAAMVH…
>CRv4_Au5.s12.g3076.t1
MSTLRAALGHAARVAHEGSLVGLLSRGMASAAQPAVDHAHHEKSRSALSYAQKLPNQLFIDGKWVDALSRKTMPVVDPRTEEVVVEVAEGDAADVDRAVEAARRAFDTGPWPRMTAKERGRLLYRLADAMEAHVDELAQLETLDNGKPFFYSRHVDVPFAIDHLRYYAGWADKIHGKTIPVDGPYLAYTFHEPLGVVGQIIPWNFPILMAAWKLGPALAAGNTVVLKPAEQTPMTALKVAQLAKEVGLPDGVLNVVTGYGPTAGNRVASHPGVDKTAFTGSTEVGRLVAKAAAEQLKPCTLELGGKSPIIVCPDVDVDKAVADAHMALFFNHGQCCAAGSRVYVHEAVYDEFVRKSTEAAATRKVGDPFSSVEQGPQVDDDQFKKILSYIDSGKRQGAK…
>CRv4_Au5.s12.g3125.t1
MAALSWQGIVAVTFTALAFVVMAADWVGPDITFTVLLAFLTAFDGQIVTVAKAAAGYGNTGLLTVVFLYWVAEGITQTGGLELIMNYVLGRSRSVHWALVRSMFPVMVLSAFLNNTPCVTFMIPILISWGRRCGVPIKKLLIPLSYAAVLGGTCTSIGTSTNLVIVGLQDARYAKSKQVDQAKFQIFDIAPYGVPYALWGFVFILLAQGFLLPGNSSRYAKDLLLAVRVLPSSSVVKKKLKDSGLLQQNGFDVTAIYRNGQLIKISDPSIVLDGGDILYVSGELDVVEFVGEEYGLALVNQEQELAAERPFGSGEEAVFSANGAAPYHKLVQAKLSKTSDLIGRTVREVSWQGRFGLIPVAIQRGNGREDGRLSDVVLAAGDVLLLDTTPFYDEDREDI…
>CRv4_Au5.s12.g3133.t1
MAKKNVPPGLEILHACYGGKRFSYNWYKGSVLVLTFLCYMGYHAARKPPSIVKSVLRGSPPVIGKGRSLLADGGLAISVSDPTTLNGWYPFNGDNGQTLLGQIDLAFLGTYAIGMFFAGHLGDRLDLRWFLTVGMIGSGIFTSLFGMGYFWDTHMFAYYTLVSVAAGLFQSTGWPSVVSIVANWSGKGKRGLIMGIWNAHTSVGNILGTVIAAAMLSEGWGYSFIVPGFLMIALGVLMWAGLVVQPSDVGHINPDDKSGRPNYEEELVPLGGVSGSKADAALERKDSTSRKEEPESIHFMDAWRIPGVASFAFCLFFSKLIAYTFLYWLPYYIKSTPIEGRKLDAKEAGDLSVLFDVGGVAGGVLAGHLSDKSGASACVATAFTLLSVPCLYMYRTVGH…
>CRv4_Au5.s12.g3139.t1
MLLKGANTRLNRRTASDVAGLGAALPQPSVRRSSTAHRQHQLAAQAGRRVSVVLAAAGTMQQEDVTSVSATGAPRSAVLGVLGGGQLGRMMALAAANLGVRMKCLDPTPDAPAAVAAEHMEGHFRDAAAIEDFVKSKGVDVLTMEIEHINTDALMQAAKDVKVDIEPSPETIRIIQDKFAQKQHFAAAGVPLPEFRNIKCRGCMEGTGKAFGYPFMLKAKRLAYDGRGNYVVKTEADIDAAAAALGGYENGLYAEKFAPFVKELAVMVVRNRDGGVVSYPIVETIHKNNICHVTEAPAGVPPAVQAQARAVAEKAIACLSGAGIFGVEMFLLGDGTILLNEVAPRPHNSGHYTMDGCVTSQFENHVRAVLGWPLGETRLNAGCAIMLNLLGEADGDEGV…
>CRv4_Au5.s12.g3144.t1
MALQSLRGRSAFSSGRAAPKAFARVQRTCRAASVVASATAVKAPSLPYRVGHGFDLHRLAEGYKLIIGGIDIPHTKGCEAHSDGDVLLHTVTDAILGALCLPDIGQLFPDTDPKWKGARSDIFLKEAVRLMDEKGYVLGNLDCTIIAQKPKLSPHKENIRNNLSAILGADPSVVNIKAKTHEKVDSLGEERSIGCHAVVMLIRKDIA
>CRv4_Au5.s12.g3146.t1
MAGIVVGSVAGAGLTLLIQRLSKLRKSGGKGDDIQERSTTSSAGGGAAAYETKKAVDEYLQFHFAAPADLLPYANGPKEALNFTARLAQLCELHCEALRDFTGERGDAVALDLGCAVGGAAFELARAFPHVLGIDYSHHFVDAANYMKEKGFSEYEAVVEGDIKATHMAAVPADIDRNRVRFMQGDACALPADLSRLDCVLAANLLCRLPEPMAFLNRCRSLIKPGGVLVLVSPYSWLKGWTDKTKWLGGYYEDGKPVRTYDTICAVLSPDFELVASSDVPFLIREHARKFQWGCSNALVWKRKGRTA
>CRv4_Au5.s12.g3172.t1
MATYALPLHHHGKSKVRLGRVWRDGNVHHMVEWNVNTMIDSDMEHAFLNGDNTGMTATDTQKNTVYVVAQRMSQKCTIEQYAIALAQHFVRTYPLVSKAKIYVEQKPWTRVQQSGLPHDHGFALQGTEVRTVYVTYDKAGTLDVTAGLKDLSLLKTTQSGYEGFLRDQYTLLPETNDRIMASTVTCTWKYAAAPACYDAAYAAAKQGLLDAFLGPARGGVYSPSVQYTLYDMAKNILDRVPTSESIFLNMPNLHFIPCNPVGSSFNNDVYVATSEPHGNIEAVITRKGIAPHCKL
>CRv4_Au5.s12.g3222.t1
MAPTAGHQHASQVEIPTFSIALPEKLTPDGPWSVYRSATSPFQLVSTYPPPADHVRTLHDNLEYAASKFPHMPYLGWRKRDDKGRLGAYTWMTYAQASDVRTALGSGLMQLGLQPKSAVGIYSVNCKEWLLYDYALHAYGMVSVPLYDTLGPDAVEFIANHAELAAVGVSAAVLPTMLTVLHRCPTVRLLVVWGASGPLPDPPAGASHCRLMTLEAVEGLGRRHPRAHLPPKPSDIATLCYTSGTTGTPKGAVLTHGNLISNAAGTATLLTESSPGDRHLSYLPLAHIYERVNIVLLTYLGAAVGFYSGNVQELLEDVTVLKPQIFASVPRLWNRIYDRVMLAVQTGSPLARGLFERAYAHKRACLAKGDPVGGRWGRLYDRLVFSKIRAKLGGELKYM…
>CRv4_Au5.s12.g3233.t1
MLEEVEGEEPQLASSTGSGMEGLMQGGDGTLLGQLLHTAFLISPFALWGTSMGVVAHTTPLLLGSLRLLPAGLLLVAWAASTGRAQPKTLTAWAWILAFALADGACFQGFLAEGLTKTSAGLGSVIIDSQPLTVAILASVLFGERLNAVGVFGLVLGVLGLCMLELPGDSLAETVSLIASGAWRPELPSGLGGEGGLANSGEFWMLLAAQSMAIGTVMVRYVTKHVDPVIATGWHMVLGGIVLSVVAAAQGADGSFAAAPPAELAASFGEQLTHLSAEDWAAMAYVSVLGGAVSYGAFFYQASRGSLTALSSLTFLTPVFASLGGFYAFGEMLSPMQLLGGLVTLSAVWAINHKPAPLQPAATPATVRVEAPQPVQQSVRK
>CRv4_Au5.s12.g3245.t1
MSAVCSQALGAAGAGSPPPPFAPSTAAAAAPAPAPAPAAAAGAATATAAAVRQQAVRQLSVQPEATVYAGPSPRNPARVTLRTIRKKYEQGEQLTMVTAYDYPSAVHVDAAGIDLLLVGDSVAMVVHGHDTTLPITLEEMLVHCKAAARGARRAFLVGDLPFGCYETDVRDAVRSAVRMLKEGGMDAVKLEGGSPARVEAARAIVETGVAVMGHVGLTPQSVSVIGGFRPQAQVAEEALRVLDQAQALQRAGCFALVLECIPGPIAAAITRSLTIPTIGIGAGGECSGQVLVYHDLLGMMSHPHHAKVTPKFCKQYAKVGETISAALQQYRQEVEERAFPGPRFSPYSISSSEVHSLAEALRKRGMGGAAQAVEEEAHRAAEAKAQLAAAAAAAGGGGP…
>CRv4_Au5.s12.g3249.t1
MAMLLKSRVSAGVSRPSRATVRVSASTRPMWYPGATAPAHLDGSMLGDYGFDPLRLGVNKDNLKWFREAELTNGRWAMAAVVGILFTDAVGLPKFWTAGAEKYALDNQTLALIEVAVFAVLEGKRYEIYKKTGETGFLSFAPFDPMGMKSEEMKLKELKNGRLAMLAFLGFCSQAAVYGKGPIETLQLHLADPGHNNIYTSSVGPETAVTVAVLCVLPMIIEATKTLNPGKESVPYFPWNEPWNKV
>CRv4_Au5.s12.g3255.t1
MALKASISSTRQVSSRAFAGVAPRPVSRRVVQCRAAAGAIGRRELLQAASAAALLTASPALAAKGPKGFNPVEDAQDNYRFVYPFGWQEVAVKGADVVFKDVVEPLESVSVTLTATDKKDITEFGDLATVAETLAKDVLTAPGTEVKIIATEQREAKGHNYYQIEFTASNSRYTRHQLAVVAANNGTFYTLTTGSNERRWGKMKEKLETTVKSFSLIN
>CRv4_Au5.s12.g3262.t1
MPDGTCCRTSACEAGPAEVAEPSAEVASRSTLLDEDLLRENPNRFTLFPIKYPDLWEFYKQGVASFWTVEEVDFTGDLIDWHRLKPEEQRFIKYVLAFFAASDGIVMENLAARFMSDIQVPEARAFYGFQIAMENVHSEMYSVLLDHYVREPEERNQLFDAIHTIPTVAKKAEWAMRWISSSNVFAERLVGFACVEGIHFSGSFCSIFWLKKRCLMPGLSFSNVLISRDEGLHCDFACCLYSHLKNRLSRERVLQIVDEAVQLEDEFCTEALSCELLGMNADLMRQYIRFVADRLLVSLGYEKHYNTRNPFDWMEMISLQGKANFFERRVGEYQRAGVMGGNNGNSARDPSEYVFTTEADF
>CRv4_Au5.s12.g3265.t1
MNGTSSGGQELAVLDTVTIPVWIYSCLSQRLVWANRAALRYFNKTLDGFTSYKFGRLSPEELSSFNVLNTLLRDEVENGGLDQVISGFGHSVLPGVIPHDDLCSSEFLYKQIYLTQPVSGCMRATQVQLISGPNMSLPTVNTAIVKTVRREQRGRQSSADGRMVNGTKVTSTVSSLIEMCDRILKGQEVDLNSVEAVQQAVLRGDIITQPTRIEEELVSKEELDQDVGLNLLQLLGGKKLGERFAPAPESYDGEVITNPMQSGSRVPGTGGPTAGGATGAPGGPGPAPAAPKEEAEPTGDEEKDVVAASLVPAMEAVLNTVDEWRFNAFKLAEVTQGHPLSALGFWLMKRYDLIGTFQLDATKLARFLRKIEDGYPDNPYHNKTHAADVLQGMHCLLTR…
>CRv4_Au5.s12.g3266.t1
MCQALAQAHKAWACREVPVGCVVVRDGHVVGRGHNLTNKSRNGTRHAEMIAIDEMLEASGGSTTGAGFDRCELYVTVEPCIMCAGALSLLGFRQVYYGCGNDRFGGCGSILPVNGEGCGACSGRPPRGVHVGRGFPAQGGLFPEEAVELLREFYAAGNPAAPRPHRPVRKEA
>CRv4_Au5.s12.g3267.t1
MQTQVKPSSSRQANLVAKGASCPRVAVRRVAGRRALEVVARDYPRPAFETAETFQEAKALSSKLKDAPRPAKPLKVVIAGAGLAGLSAAKYLSDAGHHPIVLEGRDVLGGKVAAWKDEDGDWYETGLHIFFGAYPNMMNVFKELNIEERLQWKEHSMIFAMPDSPGEFSRFDFPDIPAPFNGVFAILRNNQMLTWPEKIQFAIGLLPAIIFGQKYVEEQDHLSVTQWMRQQGVPDRVNEEVFIAMAKALAFIDPDRLSMTVVLTALNRFLQERHGSKMAFLDGAPPERLCQPMVDHFTARGGELKMNARVKDIVLNDDGSVKHYKLTTGEVVEGDLYMSAMPVDILKLLVPDQWKPNPYFSQLKELEGVPVINIHIWFDRKLTTVDHLLFSRSPLLSVY…
>CRv4_Au5.s12.g3275.t1
MLNKRVTGAFGKQAPVRSARVAAVRPSRSSVRVAATAAPQEVEGFKVMRDGIKVASDETLLTPRFYTTDFDEMERLFSLELNKNMDMEEFEAMLNEFKLDYNQRHFVRNETFKEAAEKIQGPTRKIFIEFLERSCTAEFSGFLLYKELGRRLKATNPVVAEIFTLMSRDEARHAGFLNKAMSDFNLALDLGFLTKNRKYTFFKPKFIFYATYLSEKIGYWRYISIYRHLQRNPDNQLYPLFEYFENWCQDENRHGDFFTAVLKARPEMVNDWAAKLWSRFFCLSVYITMYLNDHQRDAFYSSLGLNTTQFNQHVIIETNKSTERIFPAVPDVENPEFFRRMDLLVKYNAQLVNIGSMNLPSPIKAIMKAPILERMVAEVFQVFIMTPKESGSYDLDANK…
>CRv4_Au5.s12.g3286.t1
MAATMLRSSTQSGIAAKAGRKEAVSVRAVAQPQRQAGAASVFSSSSSGAAARRGVVAQATAVATPAAKPAAKTSQYELFTLTTWLLKEEMKGTIDGELATVISSVSLACKQIASLVNRAGISNLTGVAGNQNVQGEDQKKLDVVSNEVFKNCLASCGRTGVIASEEEDQPVAVEETYSGNYIVVFDPLDGSSNIDAGISVGSIFGIYEPSEECPIDAMDDPQKMMEQCVMNVCQPGSRLKCAGYCLYSSSTIMVLTIGNGVFGFTLDPLVGEFVLTHPNVQIPEVGKIYSFNEGNYGLWDDSVKAYMDSLKDPKKWDGKPYSARYIGSLVGDFHRTLLYGGIYGYPGDAKNKNGKLRLLYECAPMSFIAEQAGGLGSTGQERVLDVNPEKVHQRVPLFI…
>CRv4_Au5.s12.g3289.t1
MQSLQGQRAFTAVRQGRAGPLRTRLVVRSSVALPSTKAAKKPNFPFVKIQGQEEMKLALLLNVVDPNIGGVLIMGDRGTAKSVAVRALVDMLPDIDVVEGDAFNSSPTDPKFMGPDTLQRFRNGEKLPTVRMRTPLVELPLGATEDRICGTIDIEKALTQGIKAYEPGLLAKANRGILYVDEVNLLDDGLVDVVLDSSASGLNTVEREGVSIVHPARFIMIGSGNPQEGELRPQLLDRFGMSVNVATLQDTKQRTQLVLDRLAYEADPDAFVDSCKAEQTALTDKLEAARQRLRSVKISEELQILISDICSRLDVDGLRGDIVINRAAKALVAFEGRTEVTTNDVERVISGCLNHRLRKDPLDPIDNGTKVAILFKRMTDPEIMKREEEAKKKREEAAA…
>CRv4_Au5.s12.g3297.t1
MAGMGLSTGTARCYDWYMDYLKCMDERKEPMIALRREHCLEWLEDYNECLHREKERTRRQVIERERRAQLAGGSKPAGGGH
>CRv4_Au5.s12.g3309.t1
MQALQMRSSSKAVGARSAKPSRASAVRVQATSRVDKCKKSDIIVSPSILSADFSRLGDEVRAIDQAGCDWVHIDVMDGRFVPNITIGPLVVEALRPVTDKVLDVHLMIVEPELRIPDFAKAGADIISVHAEQSSTIHLHRTLNMVKDLGCKAGVVLNPGTSLSTIEEVLDVVDLILIMSVNPGFGGQKFIESQVAKIRNLKRMCNEKGVNPWIEVDGGVTPENAYKVIDAGANALVAGSAVFKAKSYRDAIHGIKVSKAPANVMA
>CRv4_Au5.s12.g3316.t1
MLLKSSTHSAKEHSLGRKGFPLRSSGLGARGYKAVTFPQLSSRGILQQRSCFTNSSTEEVAEETTAVEKRKVVDVIMNGAHHARGDVAVWKASIESSAPLLGDTGTRLEIVVIDQDTDRRSPPISVDDWRAPVLEIGPGSSTARSGGSSGSSSSGWKREGRLPLPADFRTPGAVLVRKLATAEGDSSVDFIGTIKLVSANKVFHFPAQSWVSSEHGWRVFFEGTAYLPAHTPPSLRDERQRELQALQGTPADRTQPRRPADRIYWYQTYDDLSSAGEGGYRPALGADVRRPYPRRIATNRGATPGTPDRELPPPKGEKPWLPYDEQFSFDKAADFNGDTLTAALPAAFSFIAEAGDQRHLTWLNLLPTAVRGLVNNLLRAVFKYAEPPAANFDNFEDVL…
>CRv4_Au5.s12.g3334.t1
MSVQEYIEKHGLEKKVEEVLNLCVKEKPEEPLSFMAKALGQLTPPEIVKVVGRQIIDSRGNPTVEADVYTRKGMFRAAVPSGASTGVHEAVELRDGDKSKYLGKGVTKAVENINAIIAPALKGMDPVKQAEIDQKMKDLDGTDNKGKLGANAILAVSMAVCKAGAAEKGVPLYKHIADLAGNSKLILPVPSFNIINGGSHAGNALAMQEFMILPVGASSFSEAMRMGCEVYHALKGLIKAKYGQDACNVGDEGGFAPNIGSNDEGLNLVNEAIEKAGYTGKVKIGMDVASSEFYTEDGMYDLDFKNQPNDGSQKKTKEQMLELYNEFCKKYPVISIEDPFEQDDWEPCAKLTTENICQVVGDDILVTNPVRVKKAIDAKAVNALLLKVNQIGTITESIE…
>CRv4_Au5.s12.g3353.t1
MDTQLRAQQRASSRLDSSSRQAVPSVPRVPATQRVAKAQAKNVKRGVAAQPVAGRSVAPLAAVAQSGASLEVVTPDVMEAVATVVANEPKVADMEEILAERDACGVGFIANLKNVQSHTVVKQALTALGCMEHRGACSADDDSGDGAGLMTQIPWKLLKKEMPALNETTTGVGMVFMPNDDALEAQCKQILEQVCAKEGVKVVGWRKVPVNHDIVGRFAKVTEPRIWQVLIEGKSGQVGDELERELFLVRKLVEKAKNAALPAEFAPDFYICTLSSRTIVYKGMLRSAVVGTFFRDLENPDFESAFAIYHRRFSTNTTPKWPLAQPMRVLGHNGEINTLQGNLNWVASREHELSNPIWKGREAELTPLCNAAQSDSANLDNVAELLVRTGTDPQDALML…
>CRv4_Au5.s12.g3366.t1
MLATAASKLGLTGLGIQAISAVGNSIRQFSSTENTDLKQALRELIPAQQERLKALKKGHGSKSLGEVTVDMAIGGMRGIPGMLWETSLLDPEEGIRFRGLSIPELQEKLPAAVPGGQPIPEGLLWLLLTGQVPTSSQAAAVTEELRARSNVPLHLRKVLDALPTEAHPMTQLSMGIMALQSGSRFQSAYARGVHKSRYWEYAYEDSMDLIAKLPQLAATIYRRTYRRGEYIPPSYNLDWAANLAHMMGYEDPGCLEMMRMYQTIHSDHEGGNVSAHATHLVGSALSDPYLSFAAGMNGLAGPLHGLANQEVLRWLKDLVAKLGPSPGRDAVRKYVEDTLASGKVVPGYGHAVLRKTDPRYTCQREFALKYMPDYPLFKLVADLYEVVPEVLGKTGKIKN…
>CRv4_Au5.s12.g3398.t1
MSGIKRLLQDYKQLSKFKLSSLVVLTASAGFVAASGEHIDYAKLGWTCLGTLGAAACANTLNQVYEVANDRLMNRTCNRPLPAGRMGRLHALAFAAVCGASGLWILNEKANGLTAGLGAANILLYAAIYTPLKQMTIANTWVGAVVGAIPPLMGWASAAGELDAGSAVLAAALFFWQMPHFLALAWMCKADYMAGGFRMLSMVDATGRRTALAALRHSLYIAPIGLLAVLAGFASEPFAWEAAALSAYLVYGSAQFARTPSQASARKLFKGSLLYLPLLLVALGVHRLPNQHNVDWDTLSGRVLDCVPAEARLQLGRACAVLEGAAAQVSDRLVENNIKCPSKAYGDSEELHTPRSGQQQDQGQQLQAQSAEEQQKQKP
>CRv4_Au5.s12.g3402.t1
MHIVPEPPSLFKRLPRLMLLICKVLHQLLWLLWMMLVTLPKPGHILLQNPPAIPTMAVCWLAARRHRAKLIIDWHNYGYTILALTQGARHPLVRLARSYEHFWGKRGDGHFCVTQAMQQDLQTKWGVNATVLYDRPPAFFKRTPLPAAHTLFRKLGTALEQPAFDDFLTHRSAAAAAGRTQEAAEVTVVTTKRPGQAVCARPDRPAVVVSSTSWTPDEDFGILLEAAAAYDQLVEAAAEAAAEAAAAAGTASAGTAAPAPVPALPDLLLLITGKGPQKEMYMARVAGMALRHVAIRSLWLEAADYPLLLGAADVGVCLHASSSGLDLPMKVVDMFGAGLPVCALSYSCIRELVVPGVTGLLFSTGQELAAQLAGLLGGFPAEPSEQLKALAANVASREQ…
>CRv4_Au5.s12.g3413.t1
MMLTQGRAFAAQRPAVQQRRMAVRANVARVPQVNAAAVEAKPDWAGLAAEMDNKSPLEIMDHALKTFGNDVAIAFSGAEDVALIEYAHLTGRPYRVFSLDTGRLNAETYQLFDAVEKHYKIRIEYTFPEAQEVMDLVRAKGLYSFYEDGHTECCRIRKVKPLRKQLKVYKAWITGQRKDQSPGTRTEVPVVQVDPVFEGVTGGPGSLIKYNPLSNMTSAEVWNFLRVMNVPTNKLHNCGYISIGCEPCTRPVLPNQAEREGRWWWEDAAAKECGLHSGNIKKADGTTEERKAERDLWPAGSAVATLSKDEVRALAAGERSQGTLAVLYAPWCPFCQAMEANFEELAKHMTGHKVRVAKYQADIDREFCNENLQLKTFPTIVYLPPNSKQVIKYPSERRD…
>CRv4_Au5.s12.g3440.t1
MVTTRSGITTAADGVAAGTAATASSKALLRCLVTGGAGFLGRHVVQQLLDSGKYEVTVFDVRPLESPRPHASVVGDLRKPADVAAAVEGMDVVFHIATAAPTGENALNIALMNGVNVDGTRHLLEACLAAGVGKVVYTSSASVVFDGKALVMADEAATPYAARPMDHYTRTKILGEQMVLEYNGKPLAKPAAASGATTLATVALRPSGIFGEGDAVFVPTLARNARAGKMKYILGSGRNECDFTYAGNVAHAHLLAAAALEPGAALAGKPYFVTNDEPKRFWDMMGDMCAGLGYGRPRIHLPFLLVIVLAAIFEYLVLPLVKALGKELRSDFTVNRILIATTNRTFSIKAAKRDFAYTPQISMKDAIAKTLASFASLRADAPAVAGGGGGGAAAGAGKK…
>CRv4_Au5.s12.g3446.t1
MPPTNRVADPEDAENTKNSVCPRINMIPVKYTKTIHFVRHGQGFHNVAGQINHDNYKSWEHFDAHLTELGWRQAENLGKHVAATRLPVELVVVAPLQRAMETAVAAFGKHEDPAVAAAAASGAANGNGNGVSSSSGDDVPLLMVAQEGVEGKATAHAAVSGRGCPPFLAHELCREHIGVHPCDKRSSITEYRKRFPGIDFSLVSPDEDVLWTADVRESKEAIRRRGLAFLKWLLTRPEREIAVVTHSSFLHFTLSCFGHGAATQVQGELHKWYENCEMRTVVLTDDSDEGVAAASHGATDPWHFAGGSNAVSGQQQ
>CRv4_Au5.s12.g3447.t1
MAWTVSLHRTSALHRTGLAPKKATCSARSPCIRTLASAAPQQKRDGPLVKICGITNAEDAQHAVQSGADLLGMIMWQKAKRAVSADTARAIAAVARGAGAKAVGVFVDEDAATISARCRDAQIPIAQLHGDGARAALPDLDPTLEVVYVLNCAPDGTPLTPPPSELLRGLGRAGARLPDWVLVDSAQGGSGQALDWRNLKVPAHEARQGWLLAGGLNPDNVATAAGLAQPSAVDVSSGVCGPDGLKKDHGKVSSFISSAKAVKYH
>CRv4_Au5.s12.g3449.t1
MQVLKSKTLVSDAAAAPRAAQRATVARPSVKVQAAPRLPPDTPKEREGGREWLGTILSRFGPVKDKAQNTTTLEFEKPLLELDKRIKEVRKVAEENGVDVSASIAELEGRAKQLRKETYSRLTPVQRLQVARHPNRPTCLDIILNITDKFVELHGDRAGLDDPAIVCGIGSINGTPFMMIGHQKGRNTKENIRRNFGMPQPNGYRKALRFMRHADKFGLPIITFVDTPGAYAGKTAEELGQGEAIAVNLREMFGLRVPIISVVIGEGGSGGALAIGCANRNLIMENAVYYVASPEACAAILWKSRSAAGEATEALRITSAELVKFGVMDHIVPEPLGGAHSDPLAAFPMIKESILNVYSEYAVMSEEEIKLDRYAKFRKLGQFQEFVVKGGDWRTALAE…
>CRv4_Au5.s12.g3500.t1
MRLTQKVPCSAIQPSVGSCPRGCGRRAVQRLNPCFSWQQRASPSASEQAEQGPSVNGGSPRSASPSSGRALNAEEDFLARARKMQQRIAKLKKLQEKISQMKEERDFMAAYNEVEASASDNDDDDDSAGSNSSPEELRRWVASLMAASAERVAAAAAAKAAAGGEGSRTSGTTSTSGVVNGAGAMASWRQGGGGGGGGVYMPASPSFDVPPATLPTPPPPAQPLVANPPAGAAAAASAPGGYVPGRIVPQHPAATAGPTAAAAAAASTSAAPPAPGQQPVIRRYSVRYNSAANKPTFVPVDGAAGASTNTGSGGGGVAAPQQQQQQQQQPDLSASPWRFRTPALQPVSAAMAPPQAPPQAPPQAPAPPPPPPSPPPTQEPVRFQSILAQAAAPAAAPAP…
>CRv4_Au5.s12.g3513.t1
MAEEQPKVEAAQEGGEQEQVIDPWSVSGGADGRIDYNKLLEQFGCSKLTEDLVARVEKLTGKPAHPFLKRGIFFAHRDLQEILDCYEKGIPFYLYTGRGPSSEALHLGHLVPFMFTKYLQDAFGVPLVIQLTDDEKSLWRGLDIDEARRLARENAKDIIACGFDVSKTFIFSDFEFVGGAFYRNIIRIQRCVTMNQVRGIFGFSMEDNIGKIAFPAVQAAPSFPDCFPHMFGTRKDIRCLIPCAIDQDPYFRMTRDVAPRIGHQKPALIESKFFPALQGESGKMSASDTTSAIFVNDTPAQIKDKINKYAFSGGGATVEEHRAKGANLAVDVPWKYLNFFMEDDNKLARIGEEYGSGRMLTGEIKKELITVLTDMVSRHQRARAQVTDEVVDAFMAVRP…
>CRv4_Au5.s12.g3518.t1
MSTFAEAPAGDLARGEKIFKTKCAQCHVAEKGGGHKQGPNLGGLFGRVSGTAAGFAYSKANKEAAVTWGESTLYEYLLNPKKYMPGNKMVFAGLKKPEERADLIAYLKQATA
>CRv4_Au5.s12.g3532.t1
MRRVLAIVALLALASSAFAEIKLQQVDRKINLNSQFARISEAVKAKNVGDKPVSDVVFCQLLNGDAVVSLYKVVNADTKAELTVSPTTVEGAPAGAACFSAKLAAPLAAGDTASLTVTAVLAKAQVPYPKEISQTEGQLMLYKDNLYVLSPYAVSAQTTEVTTPSSSVKSYTDSEKPVSKSDNKIKYGKYDLIKPWTLQELSVHFENNKPFKHIVTYVKEIEVSHWGNIYVEEKYEIKNAGARHSGSFSRLKYAHSYNGKANSFRDVRAVLPPSARSLYYVDLIGNISSSNTRKTVQATVVDIDLRYPLMGGWKVDFTLGYSVPLTGFLFHTKGGRRKLTMDLASPLEDVFVEDMVVRVVLPEGSSKLQAVLPYDMDQSTDVKYTYLDTTGRPVLVLHR…
>CRv4_Au5.s12.g3546.t1
MDVSTAANSWVDSYLEALISSGSRSALAARTGAGADDYCVPEAVDADRRVCAKYYVNQILSLDEDALRRSWNKVARTNRDSQAEKDARVEYLSWRVWAMKRKRAALAARAAAAARRAAAAAASGSGGGADEADDVMSEGRTALLYLDDLDTTVTLEPLEEEADAVEEEAGGSREGEDQEEDDDNDNDQEEEEAEAAGGGGGGGGRRSRLAQVAARLAEPLSADQATVPDTEQPDEQSWDAVYPATAAAKQAAAAAARGARHAAAAGHAAAATAADRSGAATAGGGGGSGRLSSMEEAGDAASTSTRTMAAARGASGLAAAGASLGGHSGSQLSLRSAPPALCLPPPPPGTPPTSVFAAAAGSPALPPHHHHYHPSLQTTPTSPAPLSPTLHHLHSSPGP…
>CRv4_Au5.s12.g3579.t1
MRHCDYKQSQLGRTVPKVLDPNARGRTAVAHRTPLASSSASPCHAELTSIHHFPPSPSPNPIPCSFPPSNQATDVAAPAPGAAAAHHDDRAPLPAPASLQLGAPLRSQFPILDQTVNGHPLVYLDNAATSQKPHAVLRALSDCYQEYNANVHRGVHALSARATQEYEDARAKVAALIGARNSREVVITRNATEAINLVANTWGLQNIKPGDEIILSVAEHHANLVPWQLLAARTGAVLRHVRLTPDRTQLDMNHFRTLLSPRTRLISLVHVSNVLGCVLDAAYVAEQARAVGARLLLDCCQSVPHSSLDVTTLGADWIVASSHKFCGPSGVGFLWGSYELLEEMGPWMGGGEMIQDVFLDHSTYAPPPARFEAGTPAIAETIGMGAAAEWLRELGMGRV…
>CRv4_Au5.s12.g3580.t1
MGNQQSASAPPPATSAAPCAEAAAAAGAEPPSSCPVNPKYKNPAVYNVYGQRINDPNSQAKPSPLASITGADVLDPKNNMPLEPNQLPCPGQRKPLSTERVASNIPKGGTESTWLFPSPQMVFNALKRKGKGDDVTEDDMDGFIAAHNSMNEATWQRVAQWEMLHRGECDTPTLLRFQGKPHDLSPLAWVRHMLGGPAPFDRHDWVIDRCGKEVRYIIDFYFFDDKAGTPQAFEIVARPAVDSVEAALDRVKMNIYLKFAEWGLPCPITGQAGAVAQAAAAAGGQQAASGSS
>CRv4_Au5.s12.g3600.t1
MQALQRSAKTLPTTSQRVREIAAVTSAPRAVAGPLSARTTAPLVQPVSAPLASGRRVEARAASTASAPKSSKGNAPMAVAEIGLVGLAVMGQNLALNIAEKGFPISVYNRSYDKTEAAVKRAQKEGLGEKLHGYEQVKDFVQSLQRPRRVIILVKAGAPVDQTIDQLCEFMEPGDIIIDGGNEWYENTEKRMAKVAAKGILYMGMGVSGGEEGARRGPSMMPGGSPEAYSHIKSVVEKVAAQVDDGPCVMYIGGGGAGNFVKMVHNGIEYGDMQLISEAYDVLKTLGGLNNEELAAVFKEWNDAELKSFLVEITAIIVNKKDDQAPGYLVDQIVDQTGSKGTGKWTVQQAAELAVAAPTMASALDARYMSALKSERVAASKSFTSCVTPGPVAGVDKAQ…
>CRv4_Au5.s12.g3600.t2
MAVAEIGLVGLAVMGQNLALNIAEKGFPISVYNRSYDKTEAAVKRAQKEGLGEKLHGYEQVKDFVQSLQRPRRVIILVKAGAPVDQTIDQLCEFMEPGDIIIDGGNEWYENTEKRMAKVAAKGILYMGMGVSGGEEGARRGPSMMPGGSPEAYSHIKSVVEKVAAQVDDGPCVMYIGGGGAGNFVKMVHNGIEYGDMQLISEAYDVLKTLGGLNNEELAAVFKEWNDAELKSFLVEITAIIVNKKDDQAPGYLVDQIVDQTGSKGTGKWTVQQAAELAVAAPTMASALDARYMSALKSERVAASKSFTSCVTPGPVAGVDKAQLINDVRAALYASKICSYAQGMNIIKAKSVEMKWNVDLGGLARIWKGGCIIRAQFLDRIRVAYERNPELPSLLVDPD…
>CRv4_Au5.s12.g3612.t1
MSNPARVLYLLVDGIGDVSIPAFGDRTPLEVAHTPHLDALAAGGLNGLLDPVEPGLACGSDTAHMSIFGYDPRIHYRGRGAFESMGAGIAMAPGDIAFKCNFATLDTASGIVTSRRADRHFEHLGPTLCAALDGLAVPGYPGYRVTVRYATEHRCGVAVSGPGLSDAVGDTDPLKDNLPLRKSEPTDDSPEAAFTAGLVNALSDAICGVLETHPINDQRRASGEAVANVVLLRGCGSRIRVPCFRDKHHMRGCLVAPTKIIAGLGLSFDIDSLEAPGATGSYNSNLSSKATTICAALTGAVSSPEQQLQAMELSKEKEEKEEEPQPPVLTAEQCANPGPGGGGYQFGFVHVKAVDDTGHDRMVGFKVRFLEAVDKMVGQMLRRLWEAEAAGRGRYVVVV…
>CRv4_Au5.s12.g3633.t1
MAVALQRSAVGKRLRAATPVRVGLSESARRPVARPTGVAARRVTRSFVVRADVNSDAFQPRPAGAPAARVAPENTPPVRQHDFLVIGSGIAGLTYALKVAEYGTVAIITKDNAAEGCTRYAQGGVCAVLDKSDSVADHVRDTIVAGAFLNDPQAVEVVCREGPARVLELVELGAEFSRNNDGSLHLTKEGGHSNRRIVHAADMTGAEIERALLTSAKSHRNIHFYEHHLAVDLVVDEYGGMLHCFGADVLDQRSGTMSRFLGLATLLASGGAGQVYPNTTNPHVATGDGIAMAYRAHANVSNMEFVQFHPTGLYNPAGGEGSTFLITEAVRGEGGMLFNKAGERFMETYDKERLELAPRDVVARAIHDQMRLGNEHVWLDISHKPRDEVLHHFPNIAAR…
>CRv4_Au5.s12.g3635.t1
MDLNAGTLLGKSGVEPALEAWCFLATWAMIGTAVPVFLALIAGITAPYGRYVRSGWGIFLNARVAWLTQEIPSLIVFVVMLLLFSTPDSFLQHPLSARTVLSGAFCAHYVYRSIVFPFIIRGGKPTPLSVWAMSFVFCIWNGFIQGWCFARQMTSDTPVWNPRVMVGLAVWLFGWLNVMRADLILINLRKPGESGYKIPHGGMFNFVSAGNYASEICEWSGFALAAGTLPAAAFAMFAFCNLSPRGHHHHRWYREKFKGEYPASRRAVIPFVW
>CRv4_Au5.s12.g3638.t1
MMLMQRSSVRPAGGRGRRALTVRSVAAAAPATKSVSGTMNALKAKGKVAFIPFICAGDPDLDTTSLALRKLDEVGADVIELGVPYSDPLADGPVIQGAATRALDKHTTLDKVIEMVRRTAPAMKAPLVMFTYYNPIMRKGLDNFARTIKEAGAAGLLVPDLPLEETVSVRAACEKAGIELVLLATPTTPQARMRAIAQASQGFVYLVSVTGVTGMKEQVSGRVEGLVSELKAVTDKPVCVGFGVSRAEHAKQIVSWGADGVICGSALVKALGEASSPAEGLQAMEKLARELRAATP
>CRv4_Au5.s12.g3671.t1
MAVSLERQPVQFWAPCFFAGFPISYVLDKLADSLVERYIQRRGSRNGGGNASSIDASGDRSSSGGKIHICVQHASPHITATDRSAGMAGAEVAHTGDGIAGSSRATLRCSSGKVEARAPVDLDSGTLAYAATDTTFSAFTCPDTNCGCGSGVPSSAVKGAAVTGEPAALDTPGGAATAQKGQQEGSKVSRVQVALEAPLELGAVAAEVEAEVERSRALVHMGFLAALAVALHNCPEGLVTFVGYMNSIGAGITTAVAITLHNIPEGMVIASSVYYGTKNLTTALMWASIAALTEPLGGLIGLAVVCGGSMTDTVFGILFGLVAGIMVYISLKELLPGARRFDPKDKVTTLMTVLGMVVMSASLTAIMYSQPGGPASTSSPATVTVPLVCTNATAAPAAP…
>CRv4_Au5.s12.g3675.t1
MLDPQPAQLIPGAHLIGAKLETPCRFTVWWAQPYTSRTGCVTKHRFKACHSTRFETPDTVAAQALVEYLRRRASWWGRASPPHVAAIVNPVSGKGSAQRLMEAQVLPLLRDVAGLRVTVHVTQARMHAAELVRGLNLSCGSSAAEGAAGAAAASGSGAAPPVDLIMFVGGDGTLYEGLQGLFQRPDWEAAVQCPMAAVPCGSGNGLAASAGLWDPVTAVVSVCRGRTEAVDVASVLQPPGNRFYCLLSVVYGSMANLDIGTQHLRWMGELRFHLGGLWEIIRGRLYNCRIFVLPPAGEGAEPLARDGNGTAGTGAASPQAVVITLPQGATEDTAAGGAGGASGAAAASSGKAGGGMHERLLPARQSAGNAGGGAGGHVSDYPAGPPLPLLASLPGLPHP…
>CRv4_Au5.s12.g3676.t1
MAVSMRLNTQVSGRATGAPRQGRRLTVRVQAYGMKAEYIWADGNEGKAEKGMIFNEMRSKTKCFEAPLGLDASEYPDWSFDGSSTGQAEGNNSDCILRPVRVVTDPIRGAPHVLVMCEVFAPDGKPHSTNTRAKLREIIDDKVTAEDCWYGFEQEYTMLAKTSGHIYGWPAGGFPAPQGPFYCGVGAESAFGRPLAEAHMEACMKAGLVISGINAEVMPGQWEYQIGPVGPLALGDEVMLSRWLLHRLGEDFGIVSTFNPKPVRTGDWNGTGAHTNFSTKGMRVPGGMKVIEEAVEKLSKTHIEHITQYGIGNEARLTGKHETCDINTFKHGVADRGSSIRIPLPVMLKGYGYLEDRRPAANVDPYTVARLLIKTVLKG
>CRv4_Au5.s12.g3677.t1
MAFALRGVTAKASGRTAGARSSGRTLTVRVQAYGMKAEYIWADGNEGKPEKGMIFNEMRSKTKCFEAPLGLDASEYPDWSFDGSSTGQAEGNNSDCILRPVRVVTDPIRGAPHVLVMCEVFAPDGKPHSTNTRAKLREIIDDKVTAEDCWYGFEQEYTMLAKTSGHIYGWPAGGFPAPQGPFYCGVGAESAFGRPLAEAHMEACMKAGLVISGINAEVMPGQWEYQIGPVGPLALGDEVMLSRWLLHRLGEDFGIVSTFNPKPVRTGDWNGTGAHTNFSTKGMRVPGGMKVIEEAVEKLSKTHIEHITQYGIGNEARLTGKHETCDINTFKHGVADRGSSIRIPLPVMLKGYGYLEDRRPAANVDPYTVARLLIKTVLKG
>CRv4_Au5.s12.g3687.t1
MIETKIAQRPSPTLAVGGKGANQAVAAALLSAGTGRAAARFVCRLGDDAYLGWLQGELARAGLDTSASVVVPGMSTGAGIVWLDAEGAATSVVLGGANTQGWSLLPPDDASSAGEKAEEETAAREAALLAEHAAAVVAGGSGNASASSTGDTSAAALRASVLLLQREVPEHVNAAFAAAAAAAGIPVLLDAGGENKPVFAALLSHVDFLAPNEQELQRLTGLPTATEEQVAAAAGALMAAGARGVLVTLEGRGSLLLLGDVEAEAEAGKAAKGTGGISGGRRCRPVRAIRQPALPVPGGVVLDATAAGDAFRAALAVALVEGQGLEDGQGGKEGTGWEQALRFAAAAGAIAVSRMGAMPSLPTRAEVEQLLVEHGASPAAQAWDAPELLAAAARAAAAG…
>CRv4_Au5.s12.g3688.t1
MGWTVGNARSGQPASGAQLGNKTAALASGRTYYIAADKISWDYAPSGRMRCYPPGFAAMPTGAARIGGTFVKAQYREYTDASFKALKPRGKEWEHLGSLGPALYAEVGDVLVVVFRNNLPFPVNMAPTGGLTIAPDRPGGPTSANVTQPVPPGHTVTYTWAVPEQAGPQPGATVSSRMWLYRSNVDPAAHDNAGLTGPVIVAGRGQAGPGGRARDVDRDVVSVFAVVEERSSPFAAQHDPKLTSGASFTKNMINGWEFCNMPAGGITLRTGERVRWHVSSVGNHDGLHNYHWHGHVVELNGHHVDQFTGIPTASYSVNMVPDEPGNWLFHCHVNQHMGGGMVDMYTVEGPRAPLPASTGVERTYYVAAEEVLWDYVPLGMDHCSNPPKPFTPDTVGYPY…
>CRv4_Au5.s12.g3698.t1
MSGTESQSRTLLLVSAGAVLGGAIAFGAAFGLAHAYSKRLDALEEQKKGSVGALPTPPQSAPAAMIARKPEPQLVQPYPVNGSGLNGGLVQPVPMGLAPAPKPLHMHAPVQAVQAAEHAIMSPRVAHVRAARPHDAMAPYSPYPGQAGEASGSGRPSMGDAQLVEGESPRQPGLPVRARGPHEPHHSRPLSGGGGVGAGASGVGNHHGAGATGRKASPVPGATSTAAAAQDRAQKAALDMMMAATGGGMSGLAKPVGAAGAVTSEKVLDPSTNDEYSRVITPETAMTDEVEDVCAMLVECLELRKHWLFRPALSPEARRHEPEAAVPSDIDPQPFQYSPQPPSGHSFRMVEGVMQVFSPDDRGFNNNLFPVPGTAAEFFTDMHRILRYASSGPVKSFCH…
>CRv4_Au5.s12.g3734.t1
MVSLGLETVLAGTPSNICKTKVVCTLGPKSRSVEVLEELLRAGMSVARFNFSHGSHDYHQETLDNLRQAMANTKVMCAAMLDTKGPEIRTGTLKDGKPVQLTAGQEVTITTDYALPGDEKTIAMSYKKLAQDVKPGSQILCADGSIVLEVVSTDPAAGTVRARCMNSAMLGERKNVNLPGVVVDLPTLTDKDVDDLINWALPNDIDFIAASFVRKGSDIDTIRQVLGERGRSIKIISKVENQEGIQNFDDILAKTDSVMVARGDLGMEIPTEKIFLAQKMMIQKCNYAGKPVITATQMLESMIKNPRPTRAEATDVANAVLDGTDCVMLSGETAAGNFPVEAVKVMTKICREAEASLDYYAMFKNILKQAPMPMSPLESLASSAVRTAHKVHASLIVVL…
>CRv4_Au5.s12.g3750.t1
MLPSTVGVIGGGQMGWGIAQVIASRGMNVLLNDTNPLALERGLGQLKKALERLVKKDSMLPDDAAATLGRIHTSHNGLESVRGADFIIEAVAEDEALKKEVFRKLDRATRVETILASNTSSISITRLASVTSKPHRVVGMHFMHPAPVVPLVELAKGMHTSQQTYEAARSLAESLGKSVCVSQDRPGFLVYRLLMPLVNEAFFLLSENVGSAEDIDRSMRLGTNMQLGPLRMADNIGLDTCLSIMRTLHSQFADSKYRPCPLLVQYVDAGLLGAKSGRGVFQHDAGSGGDKQHASQPHLNLTMMPNNKMPNNQFHQHNNN
>CRv4_Au5.s12.g3759.t1
MRRSAARLLRGVGQAVARSGEVAEASAVKLFDINASRGLSAQTLSMLGALSHAATPLPSGFAASGIRSISVAALQPSDDFKPRHNSGTPAEIDSMVKATGFGSLDALIDATVPKAIVRKDGMNLGKYHEGMTESQFLEYFKAMASKNKVYKSYIGMGYYGTHVPNVILRNVLENPGWYTQYTPYQAEIAQGRLESLLNFQTMICDLTGMAISNASLLDEATAAAEAMTMCSAIARGKKPKFLVSSKCHPQTIAVCQTRAEGLGLEAVVVDEDKMAYAKDVCGVLLQYPATDGSISDYKALVAKAHAANVKVCVATDLLALTMLAPPGEWGADIVIGSAQRFGVPMGYGGPHAAFLACHDEFKRLMPGRIIGMSIDAQGKPALRMAMQTREQHIRRDKAT…
>CRv4_Au5.s12.g3778.t1
MVRKVMLAATQFECTADKAANADKAEELVRKAAAAGANIILLQELFHGLYWCAVQDPAFLSWAAPLEGHPLLARFGALAAELGVVLPVPFFERHNNAHFNSVAVMDADGSCKGVYRKSHIPDGPGYTEKFYFNPGDTGFRVFDTKYGRIGIAICWDQWFPEAARALALQGAEVVLFPTAIGSEPQDPALDSYGHWVRVQQGHAGSNLVPIIVSNRIGAERLPPPHQAAGNTFYGGSFIAGPQGQVLAQVGAAPGALAHGNADPAPARVEGFCVAEVDLGAAAAARAAWGVYRDRRPELYGALATLGGSRPPL
>CRv4_Au5.s12.g3782.t1
MSARRALTLAQPLTGLWPGAQEFARSISTSVGALSGPPPPPPPPPPPSDHLEVFVNEQPVKIPKGSSVLQACDAAGIDIPRFCYHQRLSIAGNCRMCLVEVEKVPKPVASCAMPAGPGMKIKTETPMVKKAREGVMEFLLINHPLDCPICDQGGECDLQDQAMIFGSDRSRFVEAKRAVEDKNLGPLVKTVMNRCIHCTRCVRFASEVAGTAELGVTGRGRDSEIGTYVEKLMGSELSGNVVDLCPVGALTSKPYAFTARSWELKGTESIDVSDGLGANIRVDARGTEVMRILPRLNEAVNEEWLSDKGRYQYDGLKHQRLDKPMVKGPKGLQVATWQDALGAAAAALTSAAPGEVRGIAGKLADAESMVALMDLLRGLGAGDLAHEGGFSDMPADVRS…
>CRv4_Au5.s12.g3783.t1
MPKGCPSFRKRTGTEETKRTVHINASHHEHLELLHQHYKGNATSTTKYNVWTFLPKALFEQYRRVANIYFTIVAALSLTPFSPVRAWTTWTPLIIVLGVAMVKEAAEDYKRYKQDKEINNRAVEVMDPATGQYVTKMWKDVRVGDLVVVTKDQQFPADLLFLTSETEEGTCYIETMNLDGETNLKIKKAPDETKDLNQMDFASFKNATIECEGPNARLYQFTGNLLLDGKTLPISPAAILLRGCNLRNTDKVVGAVIYAGHETKIFKNAAPAPSKRSRVERIVDKIIFFMFGLLFSFCIIGAVYFSIWTEKKSPNHWYVGSANATGQYAQYAPGNPAFVGFASFITSFILYGYLIPISLYVSMELVKIAQSMGYINLDRDMYHAETDTPALARTSNLNE…
>CRv4_Au5.s12.g3784.t1
MGLFRRADGPAVVAEAHRHIPLGSSLDTEEHLPYRGNYASTTKYTLLTYLPKALFEQYRRVANIFFTLMAALSLTPFSPLRPWTCWTPLVLVVGVSMIKEAREDYKRYKQDREVNERPTRVLDRKTGEFVTIPWKALRVGDIVQVCRDEYLPADLVLLSTSSDEGTCYIETMNLDGETNLKIKAAPEETRSLEEADLVGLNAIIDCEGPNSRLYQFTGNLRLRAPLPPTVVAAMAAAQAMAAAAKAAAAAEAGGGEKEKLEQEGPGWGRAAAKSLLANGMEAHAATLKSMASTTVAASEPSRWNFRASQRRASTRVEPPHEYVASLAASAVVLRGCSLRNTTCIYGVVIYAGHDTKIFMNSTEAPSKRSYIERTVDRIILMFFCVLLIWCLISAVYHAW…
>CRv4_Au5.s12.g3806.t1
MHTIQAPPGHPGQPAALIAAAFLEQPLTIDAPDPDLTAPVLKAGDHAVHGSGEALRYLASHNAAGSKLYPAELKASIDKWLELGAVLEAAALAWVEPFASKADDEARASSRAAATTALEQLQVDLLDGKKYLVGDSLTLADVAVAAALTPLFESALGRGLQAQLAAVLGWLAGCQALPQFQKGLGTPGLCAAEGEWVEPKKDAGKEGGKKKKGKGGAAPAAAGDASGSTPATPAATEPLDPEKAAKKAAKDAEKAAKMAKFAAKQAAAEAAKAVKPADTAAEDKKAKEKAEAEAKKKADAEEVAALIEAARATPKGAKKELPGAMYKAYHPRAVEAGWYEWWEECGFFKPDLQSDKPPFVIVIPPPNVTGALHIGHALTNSIQDTITRWRRMSGYNAVW…
>CRv4_Au5.s12.g3808.t1
MALAAAAARRAVADGVPGLIYSLRWSRLGLHSTSAAWNPAEPKPVPLAKLKDSFNEGTSITYLEELEERYHKDPASVDRSWQAFFRNLDHGVTGEAMAESFDAFEKGKLAMSPFTAAAISNQTVQESMRLLLMIRAYQVLGHFAADLDPLRISGHTHPPELDPAFWGFKDTDLDREFFVGNWNQSGFLAEGRPTRTLREMLTRLRETYCSHIGYEYMHIPERDKCNWIRERIETIDPVQFTKQQKLHMLDRLSWSDMFETFLANKYTAAKRFGLEGAESLIPGMKTVIDTAADLGVQSVVIGMPHRGRLNVLANVVRKPMSQIFSEFAGKEPIAHEGEYTGSGDVKYHLGTSFNRPTVHGKMVHLSLVANPSHLEAVNTVVLGKTRAKQYYSEDHERGR…
>CRv4_Au5.s12.g3833.t1
MVKVLSPRALEGLKNYVYKPGGYTWLDHAHTPFWNWLTAQLPMWLAPNLITLVGLIVTFIAYGTMWYYLPEYTGEGPRWPYFFAGVSILVYTNLDCIDGKQARRTGTSSPLGQLFDHGCDAVALHVMLSLVQASLAEPPSVFASVAAMSVYLPWWVSHWEEYHTGVLMYGDGNFGILEANYVLALVTFITGTFGPAMWDTPMRSIVPVFPWDTSVKHAFIVFAMCIALIQNYGQLYRVFSRHWTMLPEAERGHKELGNASRLTHLASGAALIFLGAVYLADNKLQPGQARLAGLLYGLVYAIVATQLIMDHMCKEPFRSPLLPLAVLTVAAANSVLQLVDARATAATLAGAMIVYYLVYVTTIVDQVCAYLGIKCLTITPKRA
>CRv4_Au5.s12.g3844.t1
MVLLDSVKQNPLLWTCAAGVVGLGVSLLSWKAAKAAELYVPIQYQYRPGTISGWLANALANHSKSRRKRRPVRVYLDGCFDMMHYGHANALRQAKAVGDELVVGLINDAEIMRCKGPPVMNEEERHTLVEAVKWVDEILTGVPYDLNPEFVNELFTKHRIDYIIHGDDPCLLPDGSDAYAHAKKLGRFKMVKRTEGVSTTDIVGRMLTCSRVNHFINADEPHPLAKSFSMGTPREESNAEASTSDASTRTTLSKFLPTSRRLVQFSNGRVAPEGARIVYIDGAFDCFHPGHVKILQAAKAQGDFLLVGLHTDEDVQARRGPHLPIMNLHERSLSVLSCKYVDEVVIGSPCVITEDLMTTFNISVVVRGSMSETSMLGPVEEERYEVPRRMGLFTELPSP…
>CRv4_Au5.s12.g3863.t1
MEGPAQHESVAAARSTVDAYLEVPGGRVPYTPELRFLGGPDAPIPTMPCYRTIDSTGQDVPGAHIPHPLSQELSLRLYGAMARLQTMDTMFYEAQRQGRFSFYLTCQGEEATNIGSAAGLGGQDMVFAQYREQGVLLWRGYTLDQFANQLLGNALEPGKGRQMPIHYGSPELAYQTISSPLATQMPHAVGTAYGYKMDRLPRVAVTYFGDGASSEGDAHAAFNFAAVLGAPCLFVCRNNGYAISTPAHEQYKGDGIAGRGPMYGIPSIRVDGGDVRAVYNAVVEARRRALGGQPAAAAAAAAGAAGAAAAPGQHCSGSGSSGGLLTEPAVGAVGKGAGQGQGQGQGQGQQQAAEPGPVLIECMSYRSGHHSTSDDSTRYRTSEEMGAWRARDPVARFRS…
>CRv4_Au5.s12.g3889.t1
MPSALHLRCPSRARHAASRPLVRSYLRRGSGSGNGATGFVVDVPAAEPHVQTLTPAPAPAPPAAPAPAPAPAPPAPLLPPASIYTAAVAAGTLKCKIPLGKAFVLAVLAGAYLGFAGLLSFTLLNTVPGLLSTNPGLAKLLAAAVFPLGLALITICGGELFTGNTALMPAAVYEGKATWGEVLPRWAVVYLGNLLGCLAMVVAVVATGLVGSNHVLPGLAVAKTSVPLGQVLVRSVLCNWLVCLAVWMALAANNLPGKLMGMWMPVTAFVTVGLEHSIANMWVIPIGMALGAPVSAGAFLTANLIPVTLGNVFAGAVLTAGSYSLAFGRLGAAFNGEAAK
>CRv4_Au5.s12.g3901.t1
MAGHALVAVKFEVFGRVQKVFFRKYTQAEAQRLGLHGWCENTARGTVQGELEGPTEAVRQMKTWLRTTGSPNSQIERAEFGEEVPLAAYTHEEFGIRRHH
>CRv4_Au5.s12.g3910.t1
MTHINAPGAGGSAMRGAHSRVSAQRSPARGGRNSPVPQAAPLAGFAPGGAAGTCPAPPVGLPRPSSLLSLTCAAAAAPSPSSPSATLRAPLTGDPLVSYILEGPLLGSCGISANSVRGAAGEWERLGRQLALQLGFEHDAMDAVQKLRIYHYYLPVYWWAAAQLEAHRAAGQKTALVLGISAPQGCGKTTIVEQLELLFNWLGRPAASVSIDDFYLTHADQNALAAANPGNRLLQLRGNAGTHDLALGTETIKTLRNLTSPGATAAVPRYNKSAFGGRGDRAEPSSWPVVSGPLDVVFFEGWMSGFAPVPDSSSLAGIDPALPVVNEQLRGYRAAWDELVDSWLVIRIGDPQWVFKWRLQAEERMKAGGKAGMSAEQIADFVSRFIPAYSAYLPGLYGV…
>CRv4_Au5.s12.g3921.t1
MATAEFTAEELALAQPEKPDDATIEAWYMDDSDEDQRLPHKLSPNQPCPLSALRDLGVLYWKLDADKHETDPRLAAIRKVYNYSYTEIVNISKDTLPDYEAKIKSFYLEHIHSDDEIRYILDGSGYFDVRDHSDRWIRIATRKGDLLVLPEGIYHRFTLDTDNYTKAMRLFVGAPVWTPHNRPQEEHPSRAKYLDKFPAPIKASA
>CRv4_Au5.s12.g3931.t1
MSTIGKPIECKAAIAWEAKKPLEVRTVTVAPPGPGEVRVQIKATALCHTDAYTLDGLDPEGLFPCILGHEAAGVVESVGEGVTSVKPGDHVIPCYQAYCGECKFCKHPESNLCVSVRAFTGKGVMKSDGKPRFTVDGKPIYHFMGTSTFSEYTVVHEQSVAKIDVNAPLDKVCLLGCGVSTGWGAVFNTAKVTAGSTVAVFGLGAVGLAVIEAAKRAGASRIIAVDINPTKFPAAKEFGATDCINPKDHEKPIQQVIVEMTEWGCDYTFECIGNTAVMRAALECAHRGWGTSVIIGVAAAGQEISTRPFQLVTGRRWMGTAFGGYKSRVQVPELVQEYQAGKTLLDKYVTHNMKFDQINEAFELLHAGECLRCVLTF
>CRv4_Au5.s12.g3932.t1
MSETAGKPIECKAAIAWEAKKPLEVRTVTVAPPGPGEVRVQIKATALCQTDAYTLGGLDPEGRFPCILGHEAAGVVESVGEGVTSVKPGDHVIPCYQAYCGECKFCKHPESNLCVSVRAFTGKGVMKSDGKPRFTVDGKPIYHFMGTSTFSEYTVVHEQSVAKIDVNAPLDKVCLLGCGVSTGWGAVFNTAKVTAGSTVAVFGLGAVGLAVIEAAKRAGASRIIAVDIDPTKFPTAKEFGATDCINPKDHEKPIQQVIVEMTEWGCDYTFECIGNTAVMRAALECAHRGWGTSVIVGVAAAGQEISTRPFQLVTGRRWMGTAFGGYKSRVQVPDLVTDYMSGATLLDKYITHNMKFDQINEAFELLHAGECLRCVLTF
>CRv4_Au5.s12.g3964.t1
MVSPTGSATGDAICYINGKRYVLPPGRGEVTLLQFLRENGLTGTKLGCGEGGCGACTVMLSSWEDGKVQHRSANACLCPLYAVEGMQVVTVEGLGNTRDGLHPVQQKLAVMHGSQCGFCTPGFVMSMYSLLRSSTEPPSEDDIEDALGGNLCRCTGYRPILDAFKTFAKTDPAAYTEEAIAASKGLGPDGTAATNGAANGASGGAVCPSSGLPCDCKKAAGEGCGSAANGAGNGAGNGNGCGAADCCKKTGGACGGGSKAANGAGGGGKATCEPIFPPELKKREPQPLAIAGEALTWHRPVSLEALLELKAAHPAAKLVVGNTEVGIEMKFKAARYPVVIAPTHVKEMNAITVTDAAVEVGAACTLTRMMTRFKELIATLPRHQTSGLQAVVHQLRWFA…
>CRv4_Au5.s12.g3984.t1
MQSAQLKMKASSGAGARLSRPSRARMVARAQKGAVPPACWPQRVVPPEVEHRSEPKRFSVLGSTGSIGTQTLDIMAEFPDKFKLVALAAGSNVKLLAEQIRKFKPEMVAVKDASKIAELKEAIKDVSPQPVILAGDEGAVEVARHPNAESVVTGIVGCAGLLPTVAAIKARKEICLANKETLIAGGPFILPLAQEYGSKILPADSEHSAIFQVMQGLPEGGLRRIILTASGGAFRDWPVEKLREVTVAQATSHPNWSMGKKITVDSATLMNKGLEVIEAHYLFGVDYDNIDIVIHPQSIIHSMIETQDSSVLAQLGWPDMRLPIMYTMSWPERVPVQDATWPRLDFTKANNLTFRAPDRAKYPSMDLAYAAGRAAGTMTGVLSAANEQAVQMFIDEKIH…
>CRv4_Au5.s12.g3986.t1
MAMSIAARSACCGVAAPRSSTVRVAAARPAVRPSLRTAGQKAAPSRGVATKAVNELAMIAGEAEFIAGTALTMVGMTLVGLAIGFVLLRVESLVEEGKI
>CRv4_Au5.s12.g4032.t1
MAAIMKSAVRSSVRPTVSGRSARVVPRAAIEWYGPDRPKFLGPFSEGDTPAYLTGEFPGDYGWDTAGLSADPETFKRYRELELIHARWAMLGALGCITPELLAKNGIPFGEAVWFKAGAQIFAEGGLNYLGNENLIHAQSIIATLAFQVVVMGLAEAYRANGGPLGEGLDPLHPGGAFDPLGLADDPDTFAELKVKEIKNGRLAMFSMFGFFVQAIVTGKGPIQNLDDHLANPTAVNAFAYATKFTPSA
>CRv4_Au5.s12.g4049.t1
MSLEVQSKYDRGYQDEGQGLVELGTAHDAVPKTTAQPKYGDDDDLLPVVLERYLEKAGVMQKLRPYLDPSGQVKNEFARCLMAEFFGTLLFQMFGGSAPAKDTTAPAANGFALVAVIYAFANISGAHINPAVTFALICTGHMKWWKGLLYMIAQILGAIFGALIYAALIPALHLGAGAGSPGCFSPTAGVKNGDVFGWEVMMTFLLVMTVYAAAVAKPGHGNTAPLAIGLSLYAAAISGGPYTGASLNPARTIGPAVVFTCNVGVSFLYIFAEFFGAACAAGLSIFLYGRAPDSVRRPAI
>CRv4_Au5.s12.g4077.t1
MLHLEASKHTARTSARGRFGLAPAPVRLPCAPASRPASLAPSLPLRHAASLAPSSHLPLPSTSPRSSVVSAASHGALPEYKLTPAAPARLAVFVSGGGSNFKAIHAAIQDGRINGTVAVVVSDVPGCGGVTYAQQHGIPTLTYPVVKKGDFVGQGLTAAQLVDGLKNAYKCDYVILAGYLKLIPQELCRAFPRAMLNIHPGLLPSFGGKGYYGERVHKAVIASGARFSGPTVHFVDEEFDTGPILAQRVVPVFPTDTPKQLAARVLKEEHAVYPHCVAALCDGRIGWREDGIPILWEAK
>CRv4_Au5.s12.g4080.t1
MATALCNKAFAAAPVARPASRRSAVVVRASGSDVSRRAALAGFAGAAALVSSSPANAAYGDSANVFGKVTNKSGFVPYAGDGFALLLPAKWNPSKENDFPGVILRYEDNFDAVNNLVVIAQDTDKKAIADFGSQDKFLESVSYLLGKQAYSGETQSEGGFAPNRVSAASLLDVSTTTDKKGKTYYKYELLVRSADGDEGGRHQLIGATVGSDNKLYIIKIQIGDKRWFKGAKKEAMGAFDSFTVV
>CRv4_Au5.s12.g4108.t1
MQLASRALAASAAALSAPRAAKCAVPAPVAVSASRSKAVAPTRRSQGPGRQVSVKVAAPESPASSGEVIVNFDNTTDSGYTVISVQANNKPGLLTSITALFRDLGVDVGKAVVEGDEDRINDKFYVRSLSGGKLSEDKAADCVKALDVLLRSKPTGTEATRPKFENTAATGGTGKARLYTLMDTYMKNDVLSIQEDIVNHVEYTLARSRVNFDNFEAYQATSFSLRDRLIERWNDTQTWFKEKDPKRVYYLSMEFLMGRSLLNTLYNLDIKESYQEALAELGYDLETLADLERDAALGNGGLGRLAACFLDSMATLNLPAWGYGIRYQYGMFRQTIQNGFQHEQPDYWLTFGNPWEIERLIVSYPIKFYGHVSVVNEDGRQLFRWNAGETVTAVAYDNP…
>CRv4_Au5.s12.g4121.t1
MLSMIQQSGPTVTQARRSSEASVSGRCHIGVVPLAAPRRRRAGSVVRGPEPPRINIDDLMLDVPEIDGDIRSLQVEMGAIFNDAGLATTFGKKKQALQALETGLVLVDQSHWSRLRVSGDDRLTLLHNQSTQDFKALRPGQGADTVFVTATGRCLDLATALVLPSSVMLMVAEGTSDEAARGARPAGAALLERLNKMIFRGDKVAVQDVSERTAQISLMGPEAEAVLRELAPDALAAVLGAPAGAHVLVGFRGKPVFVVAGSGLGPGVPGYTLIADESIGGDVYAAFAAKGAIPMGTDDWEAARVLAGRPLRGAELTEEHNPLEAGLYGAVSLNKGCYIGQETLAKLHLRDGVNRQLWGLALSGSTAPGTQITSELSKVGVVTSACQDAEGEWVGLGYI…
>CRv4_Au5.s12.g4129.t1
MRSKLVVRPSPFVTHNNFGGGFVSDQDRVALNSMRFASPDSAGASRSNFFPHGGKGGINVLEASMDQLNMTLPPWAIRAGARREIYFDPSQTTAAIVTCGGLCPGLNDVVQGLVNKLTDYGVPEGKILGIKYGFRGFYDPQVKPIVLSKRVVDGIQLQGGTILGTSRGGANIREIVKRIDMWGIDMLFVVGGNGGNAGANAINAMCRQHDVPCSVVGVPKSIDNDILLIDKCFGFDTAVEESQRALMAAKVEASSARKGIGLVKLMGRQSGFIAMQASMASGVVDACLIPEVNFKLDGDNGLLKYLDGVIKAKGHAVVCVAEGAGQDILEDGGQIGTDASGNPILKDIGAFLKDKFKAYFKDADIKYIDPSYMIRSVSTTTNDRIYCKILAHNAVHAAF…
>CRv4_Au5.s12.g4160.t1
MAFTMRAPAPRATAQSRVTANRARRSLVVRADKDKTVVIGLAADSGCGKSTFMRRMTSIFGGVPKPPAGGNPDSNTLISDMTTVICLDDYHCLDRNGRKVKGVTALAPEAQNFDLMYNQVKALKEGKSVDKPIYNHVSGLIDAPEKIESPPILVIEGLHPFYDKRVAELLDFKIYLDISDDIKFAWKIQRDMAERGHSLESIKSSIAARKPDFDAYIDPQKKDADMIIQVLPTQLVPDDKGQYLRVRLIMKEGSKMFDPVYLFDEGSTISWIPCGRKLTCSFPGIKMFYGPDTWYGQEVSVLEMDGQFDKLEELIYVESHLSNTSAKFYGEITQQMLKNSGFPGSNNGTGLFQTIVGLKVREVYERIVKKDVVPV
>CRv4_Au5.s12.g4161.t1
MGGRIIQVKSAEEWTSHMRECRAFGGKSYLVDFTASWCGACQKIAPLYEKYSAENPNITFLKVDVDELADVAGECGVKAMPTFIGYFNGEQVDTVVGADDAKLRELIATLNTKGGAGAGQKLGGAAAAPDDSPEARRARMLAAIEARNKPAS
>CRv4_Au5.s12.g4170.t1
MSSRLAQKAVEVAHQDKRLFGGAARHFYFEICRCLPFIQRLHKMEEMVSLKELRAIVKEKFKEYKDVKDGRVVDLLIFKGREEIETYLLMHKQRHHVVTEVVEPYYAKQRAVKKVTTNSPFLDSFLSSGYAAIGVRNS
>CRv4_Au5.s12.g4174.t1
MAATVDVERPVDIGELDLRPCEHQAGGHFASEQGKAAGTFVDSSGKFYKAFQDDIRGGREAAVYELIFGDADESVRKEDMEQLRRFVPKYFGTLVSDGKKLLALEDTCKAYTKPCVLDCKMGMTTIYDWAEDKYKTKNAGKDTATTQASLGYRVTGFKVWQQAKAEYFFADRHYGKKLTDGTMAAALATFANNGAIGPDAVYGGPNGAVAQIRALQSWFESQRSLVFFAASILVIYEGAATRPEDANVTIRFIDFAHTFPSKGQADANVTPAVKSLADLMEQVATGQAS
>CRv4_Au5.s12.g4175.t1
MERGTGSCPTAGAALDVDEWAAAYAQAKAAMDAKAKPVGSLGALEALACRLAAAQRSLTPHVGRAALLVFAADHGVAAARPAVSAFPAAVSAPVFRAVVRGQAASAVLCASNGVSELIAVDVGLAADVTDAVPPTPTPLAPGEAGGEGRGLRISLLHRKVRPDGSRNMLTGPAMSQEELAAAMAAGAEAVRAAVRGVMPPAVVEAGQAAAAAAAAPAGEAAELPADWRQSIVCLGEVGIGNTTAAAALLAALTGASPEEVCGRGTGVDDAGLESKRRAVLEALAANAELIAGGGALGALRAVGGLELAAMAGAALEAAALGVPVVADGFISGAACLAALAHDPQRVGRVLLLSHRSAERGAALLVSALTGAAPLAPHLQQQQQQQQQQQQQQQQLLQHK…
>CRv4_Au5.s12.g4183.t1
MRAAALPSASRSLRFAQRWGQRPVARSTICASATRDTVTDQDRAYILKALELAKRAQGKTHPNPAVGCVIVKDGKVVGEGYHPKAGMPHAEVYALRGAGNNAEGATAYVTLEPCNHYGRTPPCSRALVEAKVARVVVGVGDPNPLVAAEGIATLEKAGIQVAIMDGPEREACYELNRDFMERMKLEAAQAARARAAKEAAREANEAANKQAKQ
>CRv4_Au5.s12.g4215.t1
MPADLTEVSTEALMAEIQRRLDCTKKPEKRIILIGPPGCGKGTQSPRIKNEHCLCHLATGDMLRAAVAAKTPLGLEAKKAMESGALVSDEIVIGLIEEATQQAECAKGFILDGFPRTVVQAKKLDEMLAKRGQAIDRVLNFVVPDSLLVERVVGRWVHPSSGRSYHVKFAPPKVAGVDDVTGEPLMQRKDDNAETLKARLGAFHDQTTPVIQHYAAKVVALKADRPQDEVAQAIASALNK
>CRv4_Au5.s12.g4217.t1
MVAATLGSAGVMEVVRVPCLSDNYVWLLHEAAPAGGSGGGRTAVVDPAEEAPVVEALAARGWSLDAVLNTHHHGDHTGANLALKRRFPGLVIVGPRADKDRIPGIDVQVGTGDTWHLGGLEVRVFDTPGHTRGHITYWVPQAASLFPGDTLFALGCGRLFEGSPQQMWTSLSQLAPLPDDTLVYCAHEYTQSNARFAVTVDPGNAALAQRKAAIDAARARGEPTVPSRLGEEKATNPFLRPHDPAIRQQLGFDAAAPDWQVFGAIRAAKDRF
>CRv4_Au5.s12.g4218.t1
MADFVRRYLYYVVVGPGSKDDANCKWKPTFRKWHIWKVMASYFPGARLIKTADLDPAGRYIFVSHPHGVIAISDWLAFATEALGFSKLFPGLDLRCATLASNFWVPGLREYILSHGMCGVGRDTLARVLTGKPGRAVVLVVGGASEALLAAEGTYDLVLRNRKGFVRLALQTGASLVPVLSYGETDTFHTYIPPPCSRAAAVMKVLKQVFGFSTPLCWGTGLFGGWGMLALQVPLTVVVGAPIQVDKVSSPTEAEVAALHKTYTEALQKLWDDTVDKYGKGVKRPLAIVQ
>CRv4_Au5.s12.g4221.t1
MAKHPYFPLDLELPGFVPNIIPYETILTVFFGSSALVVIFMFLLTGRFKYLSSVERLWAGWWMVTGIIHFVIEGTVVANANFYKDTTGNILNEIWKEYAKADSRYATRDAFIVQMEGVTAFIWGPICFAIVYGILHRKAWRFTAMLLVSLGQLYGDVLYYLTCFHIGVEKHTRPEPLYFWGYFVGANAIWIVVPVTCIIYCARHVNSAVAATGKVKSH
>CRv4_Au5.s12.g4222.t1
MGEEGEAGPGPSSQAAAAVEEEEKAAAPLERPPPEELDPDDLLNAFFSDLKEVDRDNEVNRILWAFKLNPFEKLNLHFDATPEEIKKQFRKLSLMVHPDKCKHPQASTAFDILGEAQKELLDDEKRENLLKFLEMAKDEVRKERKKETKHDNIVRVASLLHEDGRDGLEAEWEKSDEFHERWKMKSRDVLARSEWRKRKLGKRLKEETLRIEEKEKDAKERHKAKKEHEQNWEKNRDQRVTGWHDYLKGGGNKKSTGMLKPPKLKTNDDDKLYVQRPAGEQFRPQVKSAGPKKD
>CRv4_Au5.s12.g4232.t1
MASKPSPGSADQAINDGWYTELSPMWPGQGLSLKVKEILYRGKSDFQDVCVFESESMGTVLLLDGVIQATDRDEFSYQEMIAHIPMCALERPAKKVLVVGGGDGGVLRELARYPDVEEIHMAEIDKMVPDVSKQYFPEMAVGFSDPRVTLHICDGIKYVEDSPEHSYDLIVVDSSDPVGPAEVLFEKPFFEALHRAVRPGGIVCTQAESLWLHLDIIKALAGMCKEVFAGGSVSYATTTIPTYPSGQIGMLVCAKARTEQGEGGSAPLDPRIPRQAEPGPLPQLGVPELKYYSHEVHTAAFVLPVFAKKGLEGCLTFQ
>CRv4_Au5.s12.g4237.t1
MAANLRYCFISEWLDPASGILWKYQLFYYPESKEVEMVDIKNRRHFLKRTKYEELKPSLLFLGSVVTVFSRQLKLTEYGDEFTRNRMESQSERTLAMIKPDAYKNMGKIINAICQSGFLISKLRIGKLSKEEAGEFYAVHAGKPFVDRLTDFMSSGRVVAMELVAPGAIRKWRELIGPTDSNQARAEAPGSLRAQFGTDKTFNACHGSDAPDTAAEECNFWFGPGRYPGKCDLAAGTTLCLVKPHLVADGAAGLVIDLIQESFEVTAGGLYNLDRNAAAEFLEVYKGVLPAGDFNSMVEQLTSGACIALEVADRDGADAVEPFRQLAGPLDPELGRVLRPASLRARFGLDAVRNGVHCTDLPEDGVLEVNYFFTILPTAS
>CRv4_Au5.s12.g4241.t1
MALRCKTPAATCAARSRRSVRVSAHKGAFEQAQVAAAAFVAAAVIAAPANAGVVLQQPVLKKAFQDDTPAAPPPKREFRGLAPPALPQSDAPNVAAEKPKKAEVVESTSGGLDPRSVALPGALALTIGGFVAASKIDGSFNDWFMEAVVRDSNNYAGYEATLKSENGVTFPKVAAGGTKKVKAATGSKKGGFPFGGKK
>CRv4_Au5.s12.g4262.t1
MLRQLGLALRAHGLAVSGAPMLQSRLILQSSAASLSTSASNQHESSPPAEGTETVSITYIDKDGKEHTVAAPIGKNLLEIAHENEIDLEGACEGSLACSTCHLIFEDEATYKKLPEPHEDELDMLDLAFGLTDTSRLGCQVLASKDLEGVRVRIPSASRNFYVDGHKPKPH
>CRv4_Au5.s12.g4266.t1
MTSEELSVRKLEQGDFDKGFLTVLGHLTTVGDVTREMFEEQIRRRDAVGGYHTVVIEDNSRIVATASMVVELKFIHGCSKVGHIEDVVVDPAYRGKRLGLKLIEALIESARGDGCYKVILDCAEGNVPFYEKAGLVRKEVQMVRYLDR
>CRv4_Au5.s12.g4273.t1
MLVGKQWRPFTAARAPTGRHAGHGACSRRLVVTAQASANGDRKQRVVFLGTPDVAAGVLQQLLTASQQPGAQFEVAMVVSQPGKPRGRGNRAVAQPSPVEALARDSGLLAPEAILCPARAKEESFLAALSELQPDLAVTAAYGNMLPQRFLDTPRLGTLNVHPSLLPRYRGAAPVQRALEDGVRETGVSVAYTVLACDAGPVLAQQRVAVDPDIQAPELLTQLFGLGTQLLLDRLPDVWAGRGQQLAVPQDESQVLHAAKLGREESMLDFARDSAEVTHNRVRGFAGWPGTSARFEVTDEASGASEVIEVKILRTRLPSQSRGGADSSAPGAAGAAIVFEGDAMLVPCACGGVLEVLQVQPPTKKAMAAKDWKNGLRGKRLALPAEQSQVQTQQAVAAA
>CRv4_Au5.s12.g4274.t1
MLLSGRTSQHSGDERRAYHFGAVLSLALSLAFPPPAAAASAGAPSYHRRSEPVYNAGAAGATRSEAGDDDLPTQRSVSTTGAVGDSGSSGFGPGAASAAPAGPSAAVAAAAAGAVAAFAALAGPLPAPPSPRLSTAATTAALSSPPRIGRRDAAGVHHRISASASSTMLGRAAGAGAAGASAGAAAPVLTGANGAGSYAGGGGAGAGGGAGAGGNAAGGSGGAGMGGLHHGAGARLGSSSTSSLNSLTGGAASSAGTASGRGHGRAGFKLVLHGGSDASTSLRQLTSYGAMFPAAAVGAAGAASGGSSLGGMTAGAAACAASGLLPSDGAGSLEPGGGSFGGGGGGGNGVRESASANDLEGSGGAKASGTRELRLPSQQQQQRYAQQQQQQQQQQQQQQ…
>CRv4_Au5.s12.g4281.t1
MQTLASRPSLRASARVAPRRAPRVAVVTKAALDPQIVISGSTAAFLAIGRFVFLGYQRREANFDSTVGPKTTGATYFDDLQKNSTIFATNDPAGFNIIDVAGWGALGHAVGFAVLAINSLQGANLS
>CRv4_Au5.s13.g4299.t1
MQQVCTQRCPSRSAASRSQFQLFSVVPASRARAPQLRVRADAAAPASGAANAPGKVVCIGEALFDLIADQKGVPREKVRSWKPYAGGAPCNVAVACSRLGLEVAFVTALGADKQGDELLALCKERGVNVDGVQRLADHPTRDVYVTRDDDGDREFAGFGLPGIGSEYADAHIDPERLPLDKITHGSVVVTGTLGLSYPTTALALRKAVKAAKGVGATVLIDVNWRPVFWEDGAAAKRVIMEYLQSADVIKLSDADLEALMGISLALALINPGAVAERFPNARGVLVTAGQEGASYSFRSPTKAEHSGVVPAFDVGVTDTTGAGDAFTAGFIYKMLQAGGLDAISANPRLLKEAVVFASAAGASTCTRAGAIESQPTLELVEDLFNTSAKWYNFW
>CRv4_Au5.s13.g4356.t1
MGSSQRCDLNTVTVVGEAAEAQSEDSFAGDFGSGAYIEVDLRGGKTLPPQVERKLRREYRGRVEVQVVDYCLTAARPRLVRWSNYSDGATGMRALRGFLDMPRPVLSLLEPQIRWVKAEGFAWDLVKALAGRYNLPPLLVSDLLGVENTEVLENFGAGSGVGGSGGGSSDPGPAPGGAGGFDGTSDGILYISMPMIGLRTRLLLRSTIQQQQAAAAAARAELDPAPAPIAAAAAGPTVHGARVKVEAAGGPASNAVSRALEATIAAAMRPSGGGFGGMPVAEGVEAPLASDPAAAAVASAAEAASTAGNTGAQALLARPLAPASTSVFAQNPLMSFAAAGVDPAAAAATAGHVGASSGDGGHAGLTDLGAAAAPTATRAGAATTHVTATAAGTRGPLAG…
>CRv4_Au5.s13.g4375.t1
MNTTLRSSLKSSVAGREASGRRQARLPAPVSRVGPCRPVATLAAPPPASSHAAAPAATASKLELSELTAVSPLDGRYGRLSAPLRNIFSEYGLIRFRILVECRWLQQLSRIPAVTEVPPFSAAANAVLDKLCTPEGCTPEIALRVKAIEKTTNHDVKAVEYVLKEQFRAHPELAAVLEFTHFACTSEDINNLSHALMLKEAVQGHVLPTMDKLISELGRLSRDFADVPMLSRTHGQTASPTTMGKEMAVFAYRLKRQRDQLAAVPYLGKMAGAVGNYNAHMSAYPEVDWQAVAEEFVPSLGLEFNPYVTQIEPHDYIAELYSAIIRFNNILIDFDRDVWGYISLGYFKQRTIAGEVGSSTMPHKVNPIDFENSEGNLGLANALMDHLINKLPISRWQRD…
>CRv4_Au5.s13.g4386.t1
MTGADVKPLLPVKVPVPSDIEIAQSVEPVHISKIADAVGLLPTEYDLYGIHKAKVKLNVRERLAGKPDGKYVVVAGITPTPLGEGKSTTTIGLCQALGAYLKKKVLTCVRQPSQGPTFGIKGGAAGGGYSQVIPMEEMNLHLTGDIHAITAANNLLAAAIDVRMFHERTQTDEALFNRLCPADKQGKRKFAAVMLRRLAKLGITKTDPQELTPEERRDFARLDIDPASITWRRVMDTNDRFLRAITVGKGGEERGQTRDTGFDITVSSEIMAVLALATDLSDMRERLGRMVIGNDTQGRPVTADDLGVGGALTVLMRDAIEPTLMQTLEQTPVLVHAGPFANIAHGNSSVVADQIGLKLVGEDGFVVTEAGFGADIGMEKFMNIKCRASGLTPDCVVLV…
>CRv4_Au5.s13.g4399.t1
MSKPASYKYLVEVEPARPANGDKPSASPVYRSVYAKDGFPTADFKTLFEMFEQSAAKYPDNQCLGKRVKKENGEAGPYVFKSYKEIHTEVANVASALRALGVNPAQRVGVFGANCPEWMVAMQACNRMAMHCVPLYDSLGENAIEYIVNHSEAVAAFVSSEKLPALAKALPKTKATLKVVVYWGAGNEAAAKAAKDLGYVVHSFDELLALGAAKPAEPVPPKPDDLCTIMYTSGTTGDPKGVMLTHTAVVASVITARSYCSNNGVDLNQHDRLLSYLPLAHIFDRVNEEWFLSIGAAIGYWQGDVTKLVEDVAALQPSLFLGVPRVFDRIYTRIMGQINGAGLIKRSLFNWGFSRKLYFLRQGYAHNKAAPFFDKLLFTKVAARLGGKIKAVVSGGAPL…
>CRv4_Au5.s13.g4425.t1
MATLQAKSRAAASSARSEKAVPASFSSGSFRGQAVARPAATRAVRSVAARSRRAQAVKAIIEAPLLRYEPATKARTSSVLSIILGGGAGTRLFPLTKSRAKPAVPIGGAYRLIDVPMSNCINSGISKIYILTQFNSTSLNRHLGRAYNMGSGVRFGGDGFVEVLAATQTPTDKEWFQGTADAVRQYSWLLEDTKNRAIEDVLILSGDHLYRMDYMKFVNYHRETNADITIGCIAYGSDRAKEFGLMKIDEKRRVTSFAEKPKTQEALDAMKVDTTVLGLTPEEAAEKPYIASMGIYVFKKSVLLQLLNDSYAKANDFGGEIIPSAAKDHNVVAYPFYGYWEDIGTIKSFFEENLKLCRHPATFEFYDPQSPIYTSPRVLPPATVRNCKVTDAIIAQGSF…
>CRv4_Au5.s13.g4437.t1
MALAAMLSRGAGVFDVRRHLGTKVREASASTWPTSDRMLQINSLESLFQDSRNTADHPWLSNWTAPFPDVGFLGGELHPIGADELWGLAYRLRKRFPSLAGLEYLPKRFPVVSTQARACVARTAASASAFTAGFFPEVGSAADPADDSPSVNPAAPSLAARGAGAAAGGGPGVRAAEEKVVVEVEEERVAVMDVDAAGRPRLRAADAAGGLLSAADELDASLREVPAVKRPQAVAMSMAPKAADPLLRFFDVCPAYAQHDEYTEKWMGGWMQGNWSALVPALEKRLGLSRDMDPCEVEALWQLCLLEAGLEGVGNRACSLFTPQEAMQLEWVDDIHLLETQSWGADINYRIAAPLLRDAALSLKGAAAAASSAPGTAAPAGRLLFAHCETLVPLATLMG…
>CRv4_Au5.s13.g4441.t1
MLRQLATLLPGALRSASGVNSLALNRGFKAVADVEIDFNNREVLKKYVGIRDHLSKEPGTRGKLIEALTEVLSSIKAAPEGSDYRKAVEASCIYRLKVCKENESDAAIEEVLDAHLEELIKEAKEEARLVPLIAGNAPWDVPADYAVPVVDYTDAATILDAPPKK
>CRv4_Au5.s13.g4462.t1
MADEMDPMTACITALTDAAMTTAQATALCGQFAFAADNSDLSDRLDQTNQGLNTLYLVSCGALVFVMHAGFAMLCAGAIRSKNTMNILLQTVMDAAVSAVAFYILGYGFAYGIGNNPNGFIGDSLFGLSRWVSHSSSSDAGANWQAWFFQWAFAATATTIPAGAVAERLNFNAYLIYSFFISAFVYPVVVHWVWAAEGWLGYARFGGYSHLFRSGMIDFAGSGVVHMTGGLAGLAGCIMVGPRMGRFDSNGQPVEMPGHSATLVVLGTVLLWFGWYGFNPGSQLIINYTASAAVVGRAAVTTTLSGAAGCLSCLLTAFLRHKAWDLVSGCNGALVGFVSITASANVVEPWAALIAGLVGGWVFDAVCLLFLKLRIDDPLSAAPMHAFCGAWGVFFAGLL…
>CRv4_Au5.s13.g4476.t1
MHRVIARSASTSAESTTTQPCCSSASPHVHQDSSPLKGRFVLPAAEWQQLLASHPGKSPEEVLFSLITPASKLARPPISGYHVGAVALAGSGNVYVGVNIEFPGTALNNSIHGEQYLLVNCLHAGESSIRALAVSAAPCGHCRQFYSEIKDADDLEFIFGKDARPKFLNDLLPERFGPADLQDEPFPLLLEQQSNSVAWSPEAEAAMAEAGRRGDSAFAQAAGEALAEAQKCYAPYTRCHSGAAIITTSGGVHSGGYIESAAYNPSMSPFHAAVVAAVTAGGLPDGYGQIREVVLAERPDAPVQHAANIRLLLQAVAPAARLTVLPTRKA
>CRv4_Au5.s13.g4507.t1
MSAQYRARVGAHGGLPQLQHPRAASRDVDVFTPEAYEPTYCLYNNLNPRTMKRESGTLWGATLLVAGTTAGAGILALPAVTQESGFAATSGAMVGAAAFAMATGLLVAEVALNVVARYGSDNVTFTTMAEKTLGGTGASAATFLYIFHNYAILVAYVARAGQILAVAAGVPQLAAAALFSVGLGGMCYVTTPSQFDRVNGALLATYALTFAALLTIAGSEVDVPVLAAANWGAVPPTLPVLALAFVFHNVVPVVVHNLECDAGKIRSSIIMGVIIPLIMYLLWDGVILGSLDNLAATAAEAAAAAAAAISAASAAAAAAAAAAAAAEAAAAAATAAAGDAAAGVGASAVAAADAAATAAASAAAAAADAAAGSGIAGAPAIASSAELTAALDPLVLLQQ…
>CRv4_Au5.s13.g4514.t1
MSRLAQLLPGYACNTFDYANRSASIEDGLPTYRDWIEVFRKSIPTFKSHALTDKTVPEDQREAAAERFAADFNAALDALLAHPSQPAPGYPASQPLNCFNLCRLREDVLHAAGFTDIFADVKAAESARALVLLPGVCAELDSHGSLAEQFGLALRGVFAGNIFDLGAAASAELHAAGGVSFAATRDQLLPRPWAVDDYDRVLALVAAAEQRTGTAAATAADSSAPAASEAAASASSASPAASFVPPGRPLLWRKAALFVDNAGPDVMLGMVPLARLLVKMGAEVLLMANRGATINDITAAELGPLLEAAAAAEPAGPLGWAVGSGRLRVVCSGSDMPVIDLAQLSEEAVAATADCDLIVLEGMGRAIETNLNCRLACDSLKLGMIKHPEVAALLGGRMY…
>CRv4_Au5.s13.g4519.t1
MRASMRGSQGATAAQRTPTSACLRTVLCLASIAAPCPFAAAILGAQCAGPTIPPLEKDRPTAALSPFSELTVQELAAVRDFLLSKPELGLVHYDEATPTDNVIFTVEMLPPTKADVLAHIDGGGPAPPRRAQAVMFLYNHTDGPQCLRAEVGPLPSPTYYKSINYTKHTPHIHIHSRPGSILEYNGVDAILSEAFKVLDPIVAEVNGGYRFNDCEDKCLTWSDSSPRGIVRSERKCWFAMLRKVEGLYLHPLGLEFYIDTSGSDYTKWYVDKIQYANRLWNNTAEIVAWYEANNRTTPGFNPWNPETEEDYRFSTFNPRTDTAPHLPPGGRPGPRLYEPAGKRYTVNGKHISWMGWDLNMGMRSTAGMRLWDVRFNGTRVAYEISLQEAAAAYGGDSTS…
>CRv4_Au5.s13.g4526.t1
MRLAVDGRLAGPGPGTHGGPQAGRRPCAPPSPADTTGALTDLSANPLEEAFATSTGLVDAVQQDEAEIDFLGESTEGNLHLHLVDSLRKGKVGVINVFGMQQLDDIYDLPLAKLKAATQSVLDVLDVPESFPDGNPQRAIYCSRTLNLRSIKAIGYDMDYTLIHYDVNAWEGRAYEYGLETLRQQGVPVDGLRFDPDLVIRGLIMDKEFGNLIKVDRFGLVKRAMHGTRMLNWQEIRELYGREVVNLRNEGRWVFLNTLFSVSEAVMYMQLVDRLDLGMFQVGTGNISYQALYGMVSKALYRTHVEGKLKAEIIQAPERYVELDPEMAQTLLDQRDSGKQLLLITNSDYEYTNKMMSFAYDPFLPSGMRWRDLFDMVIVMARKPDFFNYNMSLYEVVTP…
>CRv4_Au5.s13.g4539.t1
MRASGGGGGGTHKRLHAGACFLIGVAGGTASGKTTVCDQIMQRLHDSCVVMLSQDSFYRCLTDEERQNVGAFNFDHPSAFDVPLLMKTLQDLREGKSAEVPIYDFAKHSRSEETHTTGPADVIVVEGILVLAMQEVREMCNMKIFVDTDDDLRLARRIQRDVAHRGRDVASVLKQYTEHVKPMFDMYVAPSRRHADVIIPWGNRDNNLVAIDLIVEHIRTKLQQPDLCRVFPNFQIIPSNFQIQGMHTIIRDRETSKEDFVFYADRLNRLVVEAGLGFLPFTERSVITPTGNAYSGVGFARKLCGVSIIRSGEAMEAALRACCKGIKLGKILVHRHRDSSDVIYEKLPSDIADRHVMLLDPLLTTGGTAVKAIQILKDRGVPEDRILFLTIIAAPEGVH…
>CRv4_Au5.s13.g4555.t1
MLLSTSCAVSAVSSRLDSGRAGRWPRAAAAAPSATGVRRGVLQTRRALSDSEGREPAREDPVIARAREQVQSGLVFQPMGEVQPLVAAMDQQLMDPKAEPGLAATYSLARSNYSPDLESGINEQINIELNMSYVYTSMYNFFARDDVGLPGFAAYFRHNSDDEREHAHLLMNYQTQRGGRVRLLALAPPETEFWHAEKGDALHATELALSLEKLNFQKLRDLHTVAQTVGDADATHFIEDYLLHEQSKDVKEAAVLVSQVRRAGRGHGVFHVDTLLAQEYGDKGAGGLDGNGAGPLAG
>CRv4_Au5.s13.g4561.t1
MSADDLGGGGFSFPVLDQPAEAPKKIPLTAFSTVTDRSGSAAKSPEAPVPITDKPARSKVPLEKGYSQVDWLKLSKSGADLNGLSGGSLRRDITLEEVKKHSTLEDAWMVLRGKVYNISPYLRFHPGGVPILMKAAGKDGTALFSKYHPWVNADALLEKCLVGLLAPAPEAGAEAQAKPASS
>CRv4_Au5.s13.g4589.t1
MAGFRTRMPGFRAQPDARTPFLVYRSERCGLVCSSGKGEAQNSLDALGPWPGSLLGGSGATPRWKRSNASPPRDSTSSLAPNYQAFIVFGRRPNGRLYAANDGTISGGEHAPGARSTDDEELAVAEDPMFLAAQARQEQQRETAAAAAAAAAAAAMAKRSGSKAGARAGEGEGEGEQAQQQQRRGRGRGGRRTSASKGNGEDEQEAAVAASSANTEERHGAAQGPRHGGGGGAGDGSGGSGGSGSSNTSVTRGDGGDGRGRLLMTGVDGSMWEVPQQHVAEAGLAEASRVSHPDLDPERQPAATAAEPSAADAWRKSRGSGNGNGNGSGRDGEGSASGSESPSSAEGLIVSAAGALPQLATTAAAAVALTTTSSSSTGHGSISGGSGSSVAGGASASGS…
>CRv4_Au5.s13.g4594.t1
MEASCSSHCQGAATSRLGQRGWRMPPARVLRLRMQASMPVEIGKLEKQPIPVPKDYKPSVVPGSRTRPTPRLDAVQMIDRLQRTLPVYVREQFGSFYSSHMGGIVTDPALMMLPPDDQLVCKGHGVSEVVVLREGHIYLLDRHIQRLKESCEQVGIALPFEEASLKRILLDVAAASGRVNGVVRFWATPGRGGFSTVETGGAEPAFYALCLGDTYYMDRMEAWPAMLVSQPVTPTLTSNVPGNQHLLTSVTQLIAGEEGMKATLFTDEEGFVQHGSGFTVCILTNSDVLVYPPNAHVTPSITLERILEMIPAERARSPDDVVVREVQQRKLHISELQAAKEAFLVCTTYTVAPLASVDGAPIADGATGVTTLALHYMLDNDMRPPPPGVISDRHTSVPY…
>CRv4_Au5.s13.g4599.t1
MSSFLDSLKWDKNNLVAVIVQHIDTGEVMMQAFADRAAISETLQTGLATFYSRSRGGRWCKGETSGHFINVFNVFTDCDRDSIIYLSDPIGPACHTGARTCWFKEVELQGQEGAAVSHAGAHDDGGDHVPRTTLLTLERTIAQRREAMKLPSDGSKPSWTARLLGNPELLCKKIREEAGELCQTLEADEGRERAASEMADLLYHAMVLCNLQGVAMEDVLRVLRKRFTQSGIEEKAARPPKAAE
>CRv4_Au5.s13.g4608.t1
MALSMIRKSAAAPVRRAAAAPVVVRGRRVITFAAVDKAKVLEDVRSIISTQLGTELEKVAPEAKFVDLGADSLDTVEIMMALEEKFEIALEEEGAEKIATVQDAADMIAAQIAAKGN
>CRv4_Au5.s13.g4614.t1
MPLLSMFKALPAVAAAGALAAVSGAGYLLTQQQQHLWGGSGRPEGDDDLELLERPPPRPAQLERLRGSSRDRPFDLLVIGGGATGSGCALDAVTRGLRTALVEREDFAAGTSSKSTKLVHGGVRYLEKAVFQNPDGKVVGAVVQDRLGQEPAFEVYARVVMNTTGCFSDQVRHMSQPDAPDIIQPSSGAHVTLPAWYAGTHSNGLIIPKTKDGRVVFMIPFLGHVIAGTTDSRCAVTARPTASSQEVGFILEALQDYLDIQVRPSDVLSTWSGIRPLAADPRAKDTQNTVRDHVIIEESDGMITVSGGKWTTYRSMAEEAVDLALATGRMPPNARPHSRTARLPLLGGAGYSHTLPQQLAQEHGRAVAEAAGGAGAAAAAAAAAKAGAGRGSGSGRVVI…
>CRv4_Au5.s13.g4634.t1
MPQWAGSCWYYLRYISPRCHEALVDREAEKYWMPVDLYVGGAEHAVLHLLYARFWHKVLYDLGVVSTVEPFGRLVSQGMILGEVEYTAWRRQQADGAEQADAGWAEEGAPGAVPVKLTDAEVDKRGDGYVLKADPSVKVSARAHKMSKSRGNVINPDDVVDQFGADSLRLYEMFMGPLRDTKVWSTRGVEGVHRFLARAWRVFEGGVTDEEPTKEQLRLLHQTIKKVSTETEEMRFNTAIAAMMEFVNGVTKSWTNRPRKALEPFILLLSPYAPHIAEELWARCGHTASLAYEAWPQADESLLVVDTINLPVQVNGKTRGTVEVAAAASQDDALAAALANGNVAKHAGGKEIKKIIYVPGKILNLIVPGK
>CRv4_Au5.s13.g4640.t1
MQTNVLRAPHGRVQARAPCARPQRRVAVVSHATGNGTAASALGLDEPIELVDGRVTSGPDLSVEVNGMKLPNPFIIGSGPPGTNYQVMKKAFDEGWGGVICKTLSLDSSKVVNVTPRYAKIRDYSNRVFGWQNFELISDRPFDVMLAEMKRLREEYPNRMLIASIMEEYNKDAWEEIIGRCEEIKVDAFEINFSCPHGLPERRMGMAMGQDPEVLGEVCGWINKAATVPVWAKMTPNVTDISFPADVALKAGCEGVAAINTIQCISGVNLDTLRPEPSVEGYSTPGGYSWKAVKPIALAKCTSIAKLIAKDYAGQGKSLSGIGGVETGGDAAEFILLGSDTVQVCTGVMIHGYPVVKNLCGGLQKFMQKHDFKSIAEFKGKSLPYVTVHSELVKRQRDA…
>CRv4_Au5.s13.g4660.t1
MDFMDIANNAEQILGEEARARVPPEFVVQLPWHANPPSLFLPIAHMAAQLGRAQQQATDGTAAASDAESAAELERVRAFLRRAWPRLAAWYNWWHGRDPLAASELNPKTLTSGLDDYPRASHPDDSERHLDLRCWMALAAQAMADIGTSLGLPAAAVARYAAAAEQLSDLRQLAALHLDQGRGVFADWGTHTEEVALEVKSIVVPGGEGQPPQRRDVSERVTTGWPQPQFVPQFGYVSLFPLIMRLLPTGREPNATASAAATAATAGATAAAGGAALTLQQLQLLTDPSLLWSEHGLRSLAKTASLYKKRNTADDPPYWRGQIWINVNYLVLRSLSYYARHGSPEVAAAAAAAHDELRRRLLRTLVGGYKRQGYLYEQYDDESGRGTSSHPFTGWTALV…
>CRv4_Au5.s13.g4678.t1
MRTRLMASLLLAACFAVALCGARAGEDAGCGAAAPDPLLYRVLNLEPNKHLKQLSEISDTEGSLARTFFSPAHRKAAEQLKRWMSDAGMESWVDAVGNVHGRLLPPAPAAAAAAEAAAGGGGSAQPKLVLLGSHYDTVLDGGAYDGALGIIVGLAAVKGALLRALQEAGRAGSLPPQLDEQDVDVVIPPALAASVLVGGRGLHLVAFADEEGVRFGSTFLGSRAVAGTLLKYGMLSSKDKAGASLLQVLREEGGVPEPVAGVVSDLALDAASIAEYVEVHIEQGHAGTVPMRGRRDSLAAAAELVTALEALCNADPASGGVSEEENLVCTVGEVKVWPGASNVIAGSTGFSVDIRSKTDPARLAVVDQYLEVVRAACQRRGVPCAVDRKHDAAAVLSDP…
>CRv4_Au5.s13.g4734.t1
MTHSANGVEGPLKVFSWSVPGRPAPSFPQGGFVASPTPLTYAAESLRAVAESNANSIVLYAKQNPDVQRLVNNYESWQQSQQNEVRQRLGSFKPPETLLSGQQQLLTEDWDLLRRVKNADLSLATAMKRSASDPSLDSPTHWKSGKHWTFNVGDDDSSSAAFDQFSQAKSSKADGDMASAARAFPRVTTAPSLQELSESWAANDLVAKNLEVVAQAIISRSRLALQNAQQSIQQTAANCQQNLQMLGTALQQNLPAGAAPPSTGLAGTGALALVPWAVHNNGQPATGAPAGTDGNGHPVPVFPPAAAAYAARQAMLAAAAAAAEAGAPGGAAPASDVTIGPWAIFPRYLRAREAEAEAAAGEGGDGSGSGAAEWYAPFEKYIESLENNKRLAQLRGSSL…
>CRv4_Au5.s13.g4766.t1
MRTLLPNESDVSLLPPIVPAFLFHRRGGAITVRPRAELDPSSAEQLNSRRDSNGSSSTSGNVNKSGGDVPIRFTLPTGFRGSIGMGVGGGLFLGGVGAAKAVALWPFGGRNARGPTPESEKRRILIGMSNTGGGHKASAEAIKAAFQETYGDKYEITIVDLWKEHTPVPFNAMPDTYSFLVRNAILWRITYQGGVICGRNQKLQERLRARPAGAGHPLLHVRGFVDNIHEWMGACDAIITKAGPGTIAEALIAGLPILLNGNVPCQEEGNIPYVVDNRVGAFETRPDRIAAIMDSWLLKGGRHWFEDMGKRAKALGRPEAVYRIVDDLAALTEEPYFDFGPATAALLGAEGAKKRKSWRPHKHPHGHPHGNGPMLAPAPA
>CRv4_Au5.s13.g4777.t1
MPANERAVFVTVGTTKFETLVERVDSLELLRALKDKGYTKLVIQKGNGSYCPSVIVPKGQTKGTTEGVDVEYFDYSPSLAAYITSAALVISHAGSGSIFETLTAGVPLIVVPNPLLMDNHQVELGEQLAAMGHLVSAAPEQLLAAVRSFDPARLKPYVKGSAAGMAAAIDKQLGFTP
>CRv4_Au5.s13.g4785.t1
MAMPDSGATQAPETFVLGLTGSIGMGKSTVSNMLKEEGVPVWDADATVHKLYSAGGAAVPLVEAEFPGVAVAGAIDRAALSKYVVGNESAMRRLEGLVHPLVAADRAAFLQQVRASGQALAVLDIPLLYETGGPSRHGCDAVAVVSAAAELQRARVLARPGMSEEKLAAILSRQVPDEEKRQQADFVLDTGVDLADTRRQVGQLVAELRRKGGAA
>CRv4_Au5.s13.g4791.t1
MDPTQLLIVVAVAVVLVAVLIARQLADYKQQVAQLDPKKTKKPREFGVHTVEEVAKHNNRDDAWIIVQHKETKEWRVYDVTEYVDEHPGGESILAHVGTDATEGVYGPQHPITTFLLMEEYCIGKLAAGEEAAFQKSK
>CRv4_Au5.s13.g4859.t1
MKQFVLTTFQTITFADGVHVISYCTCNPTWRDKASVFECDTSPCTRAASLAALGHACPHARALQLLWTWQPTLRSMPLHPLTRLSDPDPPPKIQQTQFPGAPHPHLCSVWLVGSPLSGDAAVVYCQGGVHRCTACSASKRCLHVKQLTGADQGAAAERDDTEDAIDELASIIASYVDATTGKLQVRSVSQERIADGITAKLNVFPEYGTLPSVFVPYLQPGAACGCGRLWNEAPLIHASPQRKSIVYSLTWFREVDVFQRMCTCGQKLNCNFRDYGILNLNNLDLFSHELLQCTPAQAPPRGMTTPAWLLLPAAAEEEAEAACAVSSTTTSGRDDDHARMAAAAGGGGGGGGGNVRSERGGATQPGLSRLGPGGGGGGADASGSSPPGDGGPGAGGSWP…
>CRv4_Au5.s13.g4871.t1
MAFALRSPGAVRAPACAQRASGVRAAKPGFLRSAAVARPQVQTNAAALSVPVNQLTDEERANLARELGYKSIGRELPDNVSLTDIIKSMPAEVFKLDHGKAWRACLTTIAACSACWYLISISPWYLLPAAWALAGTAFTGCFVIGHDCGHRSFHENNLIEDIVGHIFFAPLIYPFEPWRIKHNHHHAHTNKLVEDTAWHPVTEADMAKWDSTSAMLYKVFLGTPLKLWASVGHWLVWHFDLNKYTPKQRTRVVISLAVVYGFMATAFPALLYFGGPWAFVKYWLMPWLGYHFWMSTFTVVHHTAPHIPFKKAEEWNAAKAQLSGTVHCDFPNWVEFLTHDISWHVPHHVAPKIPWYNLRKATESLRENWGQYMTECTFNWRVVKNICTECHVYDEKVNY…
>CRv4_Au5.s13.g4872.t1
MHASGSAEASHGAAASAAIPYPSSASAAPASPGAVTAGDINAVACLLDAVALSARPRLRCVPLLPAAGWSLERTAALPAQVLLLPASPHSSHISHSSRRADSSSGASASSSAHHAAHPATEPQPLAEALRRDEGATASTSGAGPAGAGAAAAATPGAGAAAAAAALAERLTRLRPAQLPAWQQPPPCAACTASASTAYNTLLDGAPAPASTPLRFARVAVGGTFDRLHAGHELLLAATALVAERFVFVGVTADALLAGKSHRELLQPYDTRAAAALSYLTAVRPSLAVEAGPLSDPKAPTLAELDPAMEALVVSVETLPGATAINKGRAARGFAPLSIITVPVIGVRQRAGAGTGGGGGAGGGGGDGEVVGEKLSSSGLRAAEATLASASMDEGAVPGA…
>CRv4_Au5.s13.g4889.t1
MDSELDFTGASIEELRHADDDSRGANPAQARRYQPPQAPSIQLPNQDAEYVNHIAIDIGGSLIKLVYFSPDRDEAARDGNGGGSEGSGSGYSPSSSPEPGGNGLLSQSARSLGQQTTQRGGKLHFCKFETSRVEEAISFIEAKGLHRCSGRHGTKEMRVKATGGGAFKYADVFKERLGVVLEKEDEMGCLVSGCNFLLKAIHHEAFTYESGQTTFVPTGEDSDVYPYLLVNIGSGVSMVKVSGYGSFERVSGSSIGGGTFWGLCQLLTQRSNFDEMLELSMCGDNASVDMLVGDIYGGRDYTAIGLSATTIASSFGKGEMAAMFLRHEGFLGAVGAFLTVHPMAGVGGAGGRSGAAGESSDAQARKVRARFVERFSMGAPLTGGAVVGPAIRDVSEKVS…
>CRv4_Au5.s13.g4899.t1
MGCASSKEEVALTPLSDVNAAKEVADLKAQVDQLKRQLASAGQSAAPAAAGAVKGGVVETLFFPDEKLPCRNNRRPGGCKRQHCEYSHTPTSLSRFLDYLGSATRTLDICVFTITNDDISDVVLELHNKGVRVRIISDNDQAHTQGSDIDKFRQAGIAVRQDKTAAHMHHKFAIIDGRLLLNGSFNWTRQAVTANNENVTVLSDPKLIASFQQQFDKLWDMFK
>CRv4_Au5.s13.g4902.t1
MDRQVVGLIILLNAIAAGVLYQRFHDHPQVQLLESRALELYHKLLPPATPDRCGALKWPAYVIISDRVVFPDGVRPGAVYIEGKKIVAVSDNTTVDSPHMLNFKHAVVAPGVIDVHIHLNEPGRVEWEGIWNGTRAAVMGGVTTVIDMPLNSNPVTTDVVQLEAKKRAAKVKAWTNVGFWAGLVPENAGNHSLLGQLVDAGALGFKSFMCNSGINDFGNVGGDDIAAALPFLKSRGVPFFVHAEVVSPVESDPAADPTSYTTYMATRPPKFEQDAIRLLIEKLDADTTPAAPGFNVHIAHLADSGSLDMIKEAQTRHPLTVETCAHYLTFSAEDIPNGKTQYKCAPPLRDAANKAALIAAVASGAIDLVSSDHSPAPPSLKEIESGNFLKAWGGISGAQ…
>CRv4_Au5.s13.g4905.t1
MARVGVPRSSAAASRPRAAVRPRWLPLGPGLGNRLVLCDAHSAVPPAQGLFDPENDKDACGVGFVGELSKKPSRKCIKDALTMLNRMTHRGACGCEANTGDGAGILVGMPDGFFQAVLMEEQGLKLPPLGAYAAGQVFLPQDEEVRQKVKDICDRVATSLGHVSLTWRPVPTNNRSLGKSAVDTEPAIEQWFITSTGNRSSLEVEQQLYLLRKQIEYALRADGIKDDDAYFCSLSSKTIVYKGQLTPEQVRVYFKDLQREDFRSYMALVHSRFSTNTFPSWARAQPMRNLGHNGEINTLRGNANWMRAREGAMACLKLGLPKEVVEQMEPIVPASSSDSGAFDSVLELLTRAGGRDMPEAMMMLIPEAWQNDPLMSKEKKAFYRYHSAVMEPWDGPALV…
>CRv4_Au5.s13.g4911.t1
MLSFYFRQKDDFAEVKAFVEGADKAYGLDVEYLSEQDFKKGLCEYLERTGVMAIVLGTRRGDPNAGGQDVFCPSSEGWPAFMRVNPILDWTYHDVWVFLRATRVAYCSLYDHGYTSLGGVGNTLPNNTLRRPDGSYEPAYHLADGRLERVGRVHAAPAKAPAAAMVQAAHDAHAAQPQPGQAAGSGGSAGGAASACGASQGGVAVPVHHDSGEVGAVQANGEAPAAAPAPAPAPARSGGGAPEAVSELTRSAAIVVVGDELLSGKVDDVNARFLCRELRSLGWQVLRVVFVPDAVDDIASVVRALAATAEVVITAGGIGPTLDDVTMQGIALAVGQPLVRLPGMVERMASYFGGEAVLTPAHLKMAEGPQHADLIDYKLADGNASKFPILKINNIYVLP…
>CRv4_Au5.s13.g4932.t1
MVKKLLVANRGEIACRILSTARKLGVPTVAVYSEADRRAKHVELADESFCIGAAAARDSYLRADAILDAARRSGADSVHPGYGFLSENAAFAEACAAAGLAFVGPPAEAIRAMGNKSRAKEIMQAAGVPVVPGYHGDDQSEERLVAEAGRVGYPLLVKAVSGGGGKGMKLATGPHDLWEAITWVVRGGGSSARREALASFSDDRLLLERYIQRPRHVEVQVFADGHGGAVYLFDRDCSVQRRHQKIIEEAPAPGLPEEFHRHIGEAAVRAARAVGYRNAGTVEFIVDTDSAEQQFYFMEMNTRLQVEHPVSEAITGQDFVAWQLCVAAGGALPRSQQQLQVRGHAFEARIYAESPRNNFLPGAGTVRRWRTPAAAVTFANAPVRVDSGVREGDAVGTFY…
>CRv4_Au5.s13.g4975.t1
MGKRYLVTGAAGFIGYHSAAKLRSRGDVVVGLDNFNDYYPVSLKRARAQALVDMGVPVVELDLNDQEGLGELFRLCSFTHVLHLAAQAGVRYAARNPFAYIQSNIAASVSLMETMRLQKPMPLLVYASSSSVYGLSKRFPFTEDDRADRPASLYAATKRSLELLAHSYFNIYRMSVTGLRFFTVYGPWGRPDMSVMAFSRNIVDGKPIRVFQGPNGTELARDFTFVDDIVAGVCGALDTAAPSNDPHAAPHNRIYNLGNTQVHTVTEMVRTLEELLGIKAIIRYQPLGATSDVLRTNANITTAHNELGYTPQTNLRAGLQAFGPNGTELARDFTFVDDIVAGVCGALDTAAPSNDPHAAPHNRIYNLGNTQVHTVTEMVRTLEELLGIKAIIRYQPLGA…
>CRv4_Au5.s13.g4992.t1
MAQLQQHQGRAAAAQPKRARQLAVAPRAALTFNPASLFKGLTSSKPTPKDAAFTKQVIADESKYVLQTYGRAPVVISHGKGAKMWDVEGKEYIDMAAGIAVNALGHSDSQWYAALVEQAEKLAHTSNLYHTQPQVELAKRLVENSFADKAFFCNTGTEANEGAIKFARKWARVRAGIDPYDGGAVAPYELVSFTSCFHGRTMGALALTYKEQYKTPFYPMMPGHQLAEYNNLESAAAVIKKGKTAAVFVEPVQGEGGVTPSTQAFLKGLRQLCDEAGALLVFDEVQCGLGRTGKLWGHQLFGVEPDMMTLAKPLAGGLPIGTVLLKQHVADVMKPGDHGSTFAGNPLVCHVACSVFDIINSPAFLAAVEAKGERLRAGLRRTMAGNPHVQEVRGVGLLV…
>CRv4_Au5.s13.g5015.t1
MADRFPPPPMKATQEQMDAADVPYHYRDYCAHMYIDYKECRLTSGFSWRTKCAHELHAYNKCEYKEFKRRVAIAIEEKRRRGLIAA
>CRv4_Au5.s13.g5028.t1
MPVPEALKDSPHHRYLEVAIDAAVAAGDVIKGSFKGPKQVEEKLNHADLVTATDKAAEDLIFGRIRAAFPDHAFIGEESAAAAGGAAALTDAPTWMVDPLDGTTNFVHGFPFVCTSIALVVGRRVVVGVVYNPVLGELFAAAAGGGACLNGAPLATSAATELAGALMGTEVGTARDEETVDSTFGRVRALTSKMRSVRCGGSCALGLCNVAAGRLDAFYEINFGGCWDSAAGALMVSEAGGTVLDPAGGPWDVMSRRVLAAGTRQLGEAVAAVLAGCKLSSREVGPPPAGGVVSLERQEAAAAAAAKAQE
>CRv4_Au5.s13.g5035.t1
MAPVAGVTVKPVPTKPYEGQKTGTSGLRKKTKEFMQPNYLANWVQSLFNALGDEVNGKSLGLGGDGRYYGKEAAQIIIKLAAGNGFKKVVVGQDALMATPAASALIRRRHLYGGLIMSASHNPGGPENDFGIKFNYNSGEPAPERITDKIFGETSKVATLNMADIPDVDLSKVGVTKFGEFEVEVVDPVADYLAQLKEVFDFALLKKFLSRKDFTMVFDAMHAVTGPYAKRILVEELGAPASAVLNGVPSPDFNGGHPDPNLTYAEELVKIMWADEAPAFGAASDGDGDRNMVLGHKFFVNPSDSVALIAANAQACIPYFKGGLKGVARSMPTSGALDRVAAALNVPFFETPTGWKFFGNLMDAGKCSVCGEESFGTGGDHIREKDGLFAVLAWLSILA…
>CRv4_Au5.s13.g5035.t2
MMLSSKVHTSRASVPRSAKSAVPFTGVRRGTSVRGSASMAPVAGVTVKPVPTKPYEGQKTGTSGLRKKTKEFMQPNYLANWVQSLFNALGDEVNGKSLGLGGDGRYYGKEAAQIIIKLAAGNGFKKVVVGQDALMATPAASALIRRRHLYGGLIMSASHNPGGPENDFGIKFNYNSGEPAPERITDKIFGETSKVATLNMADIPDVDLSKVGVTKFGEFEVEVVDPVADYLAQLKEVFDFALLKKFLSRKDFTMVFDAMHAVTGPYAKRILVEELGAPASAVLNGVPSPDFNGGHPDPNLTYAEELVKIMWADEAPAFGAASDGDGDRNMVLGHKFFVNPSDSVALIAANAQACIPYFKGGLKGVARSMPTSGALDRVAAALNVPFFETPTGWKFFGNL…
>CRv4_Au5.s13.g5038.t1
MMLVAKNAVAARPSARSARRSVVAKASSRPLWLPGSTPPAHLKGDLPGDFGFDPLGLGANAESLKWFKESELVHSRWAMAAVAGILVQEIVRPDVFWYNAGKEVESPLGPLGLLAVEFFLMHWVEVRRWQDLRKPGSVDQDPIFSQYKLPPHEVGYPGGVFAPFIPGDLAELKVKEIKNGRLAMLAFVGFVMAAQVTGKGPIAALQEHLADPWGTTIFSKAAVVPGQAVAPPCKIPASVSYKGIEIPTPCFLQGLWP
>CRv4_Au5.s13.g5040.t1
MSTAAAQEPEVLVDMKGSVAVVTLNRPKALNSLSLGMVQQLLALNTQITAQPRPGEPVSCVVVKGAGGKAFCAGGDVKELVVRALARNAAGASASGPDPAAFGVAFFRTEYANNAAISQLPVPYVALIDGICMGGGVGASFHGAFRVATERTILAMPEAGIGLFPDIGASFFLHRLPGCLGRYMGLTGERLTGAEVKDAGFATHLVRSARIPELEAALVALGPRAADLSVVDNLIRSFEEPLVMAGAGAAGSLSSSALLEWKLPLINVHFGCGGVEEVIASLEGAVAAAEAAVQQPAAGSLEAAQAAFLKSTLAAMRRGSPLSHAMTWEMLRRSAAGHMTLRQALEMEFVMAARCVHGQADFLEGVRALLIDKDNKPAWKYGSVRQIPGEVVAALFEPL…
>CRv4_Au5.s13.g5046.t1
MYVGSLPVDVALEEQDAVAAQLKRLYNCCPVFMEKELKEKFYKGCCKQQMWPLFHYVLPMSPESSGRFDQEMWQAYVKANKVFCEKVVEESATDTDYVWIHDYHLLVLPSLLRKRFNRIRCGLFLHSPFPSSEIFRTFPKREELLRSLLNADLIGFHTFDYARHFLSCCSRMLGLEHETSRGSITIDYYGRTVGIKIMPTGVNPKRYLDGFSWDEFKWRRGELVAQYGGLTVLVGCDDLDVFKVGVCGEFVGCSPSLSGAIRVNPWSVESTADGIYAAIKLPREHRALRHDKHWRYVSQHTVAYWATSFVADLQRVTKNHVAMKCYGLGLGLDTFRMVALDANFRRLEERAVAASYASSHFRAFFLDYDGTLTGASPLSASAAASAASSSSGLTAGGHH…
>CRv4_Au5.s13.g5073.t1
MRAAGSTPRRSLPLLALAFLAMASSLQLAHGSLLDRLFGEAPAAPAASTADSVRDIIENELLRQEEDLHRRALTALSALAHNPAGVAWLLAAAEAALAAGQGDDLRHGGAAVKLLREVAEVDRLRRRRVAEALNIDMDISLEVRQAQQLPTRTASVASSQQQQAGGSGSGYPAYGQPYRSADADVAEQQTRERLLSSSGASGSGSGMHVQPRRLQRAAGKQQQQQTKQQKKQVPSSAADPTDAESLLTDEFDAEREAAFAAQQQQLWLEAQKEDWGNDAISAEDLAAYTGGNTGSGSDAEGSNRKNLLANSAAAAAAAEDDDVDALVSGFGDPAVTRWGAQMQERQQLFEAQEALRMEESEVEIAEAELAEARRSAAALAAAAAAEADALLSAGYDAGS…
>CRv4_Au5.s13.g5106.t1
MMLKQRPQVASAGQSRRATRSCSRVVCSAQTTMSGEVTIRRRPPHGLETQPCGPHAFRVGGLPDENKPQNILEEIVWWKAREVEVMRDKQPLALLQGLAKKMDPPRDFRAAIAAKAKETGRPGLIAEVKKASPSKGVIQPDFDPVRIAKSYEAGGAACLSVLTDEKFFQGSFQNLTKIRAAGVTCPLLCKEFIVEAYQVFKARASGADAILLIAAVLPNADLAYFMKAAQNLGMTCLIEVHTEGELARVLELPDVEKHLLGINNRDLGTFKVDLNVTKRIMDSEWGQQVKERGIIMVGESGIFTPEDVAFVQQAGCGAILVGESIVKQGDIVAGVKALLA
>CRv4_Au5.s13.g5152.t1
MDKHSLAIPFPMSELYIALGMVFLFLPLTIIVSRLLGSREPAVRLSASHQHQAQQQQQQTKQPQQPYDPQQDQVPSTSTASSSKPAADPVYNLPNAVSVARLVSGPLIGYWLVQGHYEAATLALAVSGASDWLDGWLARRLGASSVFGSYLDPLADKVLIGCVAAALLMNGAMPGWVAGVVVGRDVLLVAGSFVFRLRGFGWRWPGAAAFFRTVDTSAAAAGAATGAANGVASGGGGGGEGVSFMRPLLISKANTVLQLLLLGGYLLRGMDGGAGLQLLLPGGGGEELIMGLELATAATTVASGLAYGTMAVQGKLFK
>CRv4_Au5.s13.g5180.t1
MLLQQRLASRPARAAGSRRGRPLPFQGSRLVSHVAAAAAEVAEAPAASTSAPLAGLDGRPNIVSLLRARGLIQEVTNTEELERAAAAGRLSVYCGFDPTADSLHLGNLLGIVVLAWFQRCGHEPVALLGGATGRVGDPSGRSTERPVLSEEQIEHNVTSIGNLLRGILVRNSPPDAPAVRVLNNLDWFGSMGFLTFLREVGKFARVGTMMAKDSVRTRMESEQGISFTEFTYQLLQGYDFVHLCREHGVRVQIGGSDQWGNITAGTDLIRRLLGGEDKEAPACYGLTFPLLVDSEGRKFGKSVGGAIWLAAERLSPYKFYQYLFQVTDADVVKLLKMLTFLPLPEVEALEAAMRAPGYVPNTAQKRLAEEVTRFVHGEEGLAQALKATEALKPGAATQL…
>CRv4_Au5.s13.g5199.t1
MASDACAATEAAIAGLQPPALWKFFAQLTQIPRPSKHEARVLQYLKDFAEARRLSWRQDAVGNLVICRPGSGGGEAAPGVVIQGHIDMVCEKDPALTHFDFMTHPLTLRREGDWVRASGTTLGADNGIGVAAALALLDLPPSAKLPPLECLFTVDEETGLTGAFQIAPDLVQGRTMLNLDTEDWGEVFIGCAGGGDTTLVLEVGLQPPPPSSTPMNPYELSVSGLLGGHSGLNIAEGRGNAVQLLARALAAVDQAAAAAAGGEAAGSSSSSGSSSNGNGSGGNGSGDPGWRLVSAGGGDKRNAIARDASAVILVSDARREAVAAAVGALQTQLAAEYGRLEEGLAVRLRPLPGPAGTPQQQQQQQQQVTEVVAPADVCRLLALLRGLPHGPLKFSHAVP…
>CRv4_Au5.s13.g5206.t2
MQECPNSPRAMPNGVSPRENAVQILLHHNSRENLEQQSPGSQAGSAPGSPRPSLRASVELDPLNKLLRKNKAWSAARLAEDPGYFQRLIAQQAPEYLWIGCSDSRVPANAILGLAPGEVFVQRNVGNQATHTDLNCMSCLEYAVKELKVRNVIVCGHYGCGAVKAAIKMPSKTQNLVNCWISDIRECRNEHRTELMALPTTEAQVDRLCELNVLRQTFNVCTSPVVQHAWDQGQQLFIYGVVYSLKDGLMRKLVGPISKTGDFEMDQSSFIERGSSYIDVGMSGVSAAPCRGQSCSVLHCPRVYTQSPNRPCVHTLKRKVYVCACVPASTAAAAAMNMPDRRGGSSAPRGAPGSVVVNGRQQADSMGDGLSPSGGIMAMSFRSRMEAFNAYMNTMQVNN…
>CRv4_Au5.s13.g5211.t1
MWVGRLAVVKVQLPAGREGTQQPGPRRETAPAARGEWPSSSATAAAASAGSQAVLVEDTTQETWRTPLRRAGCVVALGKFDALHRGHQALAGAAANLCEQVERSQQREQGQAGASTSGTDSGPGGGCGEVVLLSFSGMGAVLGWPDRLPLTAPQDRGRVLAGWAAALRSAASAVGSANGATSRPSTEGNNGNGGTGTGAGDCGAGRVVRLRTMPFGQIRGMSPEEFVALLARDLGAAGVVAGRNYRFGFKAAGDAGALVRLGAQYGLKVSIVDLVSLEAAADSGGSSDPASARASGSDGIRGLLEGGHVEAVETLLGRKYRLVCDLTAAAATAGSADAAAALGTGLLRVPAACYRNQAPAPGQYRVMVRLVDSGPPGAEIAAERDSGGGAFMRTSLSST…
>CRv4_Au5.s14.g5284.t1
MFPVLFLLGPEGFGHINQFNSAIAHAILDLASKNAWSMMGHFLRVKIHEHILLYGDIRKKQKVNVAGQEMEVETMVHEEDDETQKVPTAKYANRDSFIIMRDRLKEKGFETRASLDGDPNGDAEANAAAGGKPGMEMGKMTGMGMGMGAGMGMATIDSGRVILAVPDISMVDFFREQFARLPVPYELVPALGAENTLQLVQQAQSLGGCDFVLMHPEFLRDRSPTGLLPRLKMGGQRAAAFGWAAIGPMRDLIEGSGVDGWLEGPSFGAGINQQALVALINRMQQAKKMGMMGGMGMGMGGGMGMGMGMGMGMAPSMNAGMTGGMGGASMGGAVMGMGMGMQPMQQAMPAMSPMMTQQPSMMSQPSAMSAGGAMQAMGGVMPSPAPGGRVGTNPLFGSA…
>CRv4_Au5.s14.g5285.t1
MSRRPWLLALALAVALAAGSAGASTGSDATVPVATQDGPDYVFHRAHERMLFQTSYTLENNGSVICIPNNGQCFCLAWLKSNGTNAEKLAANILQWITFALSALCLMFYGYQTWKSTCGWEEIYVATIEMIKFIIEYFHEFDEPAVIYSSNGNKTVWLRYAEWLLTCLSFLSI
>CRv4_Au5.s14.g5292.t1
MAAGRLASIAYCGRTDLLEAWNCSRCAGVPGFTPHRVVHDAVWDLVAYAGYYAPWRAIVLVFRGTDSSNWGQWAENMRAWRTDHMYPEPGFPHAMVHAGFYTLWTGSSLQTTFSAAVSELVAAHPGSRLVGIGHSMGGALAQLAAIESKLAHNGTHTTVYTFGAPRVGNLAYQQLFNSFIDVSWRFTHNRDVVPSVPLQLMGFQHVAREVWEVDVDDPSAAGGVERKLLLCDGSGEDPSCHNSACYLGLCTSVADHLVYLGVHMYQDSDEC
>CRv4_Au5.s14.g5343.t1
MTRPLLFGLALLAILSNAAAGKSVLMLLQNANTAERFTSFVDGLSAAGFTVDIKGYKDSGLKLREYGTWLYDHLILFAPKAEGFGGSIDQQTILDFVDSGHNVLLGVNSDVSETMRSLAAEFGVDLDDRGTKVYDHFQSATLDGKEDPTLIAASDLVDAPVIVGGPYKEPILFRGVAAVVSPDSELATVVLSAPATAYSHDPKKSMLEPPSLMAGAAASLITAVQARNNARMVVSGSVEMFSNSFLAATVTAGGKSTATANKDFVNTLTRWTFQDRGVLVASNMRHHLLGSEDQPWGYRVNDDVEFLVDVMEVEGGESKPYKADDVQVEFIMLNPYVRQPLAHDGAGTFSLRFKVPDVYGVFKYVVDYSHRGYSYIKLTHQVPVRPFKHNEYERFLVCA…
>CRv4_Au5.s14.g5347.t1
MQNGHADAVYDGFASSQLFNQGVCYTYDDVIFHPGHIFFAANEVDLTSNVTKNIPLRVPIVSSPMDTVTEAEMAITMATLGGMGFIHYNNTAEEQLRQVLKAKRHTPGFIVTPAVAGPNDTVSKLYELKNTRGFTSVCVTDTGALGGKLLGVVTTRDIDFINDKLTPLAEVMTTDLVTAPEGTTADAAGALLKKIKKNKLPLVNAQGELVGLATRGAFKDARNFPAPGAPSLDGAGLLRCGAAVGTRDSDRERVKMLWETAAVDAVILDSSQGDSTYQVEMIKYIKAAHPGLDVIAGNVVTGAQARRLIEAGADGLRVGMGSGSICTTQEVCAVGRGQATAVYHVARVANALGVPIIADGGVQNSGHITKALALGASAVMCGSMFAGTTEAPGEYFMLN…
>CRv4_Au5.s14.g5359.t1
MASKEELEAAAISLFLGIGLEETVAKNATKNPKFMKTLEEVVHEAGAASGCPKAKGNLLYTVASKYPANALCHRPMLLGYIMCEHMKSNAQLDGAFEYLRKVGTMEVDKKLLEESAGVGVVITPDQIKAAVAEEVEANRERLVTERYHVNMNMLLGGVTRKLKWADGAAVRAALETAVEALLGPKTEADLAPPEPKKKVKAEKPPPPPKEDKAAETAEPAAPAVPDDPYAFLPKPDANNGVHTTVNFSDGRVMRIANTPEALAAHLSRMGGKVVTRFPPEPNGYLHIGHAKAMFVDFGMAKQYDGVCYLRYDDTNPEAEKLEYIQHIEEIAKWMGWEPWKVTYSSDYFQQLYDFAVQLIKTGHAYVCHQVLGLYKPVVWEYSRLNITHNVMSKRKLNRL…
>CRv4_Au5.s14.g5362.t1
MKLEVVSRSGRSIATLDVNPDSTVAELKKKFHGLKKTYYPARQRFALPVKAGETRGQVLSDDSKRLSDYGLAEGGKLEFKDLGPQIGYSTVFFWEYFGPLVVYPLFFFLPQYLYPHIKAPAGGTQHALVQKLACAYWCFHYAKRIVETFTVHKFGHATMPIFNLFKNCGYYWGYAAYVSYFVNHPLYTAPNQTVSVACLAAAVLAQLGNFWSHLILAGLRKPGEKEYRIPKGGLFNYVSCANYTFEIWGWLLYSVAVQSIPAYLFAATGAAQMTQWAIAKHNRLRKLFDGKDGRPKYPRRWIIFPPFL
>CRv4_Au5.s14.g5372.t1
MIAGVLPPHGQNAHSGRRSALPQRLLLVLSLLLAALSLASATSRVRGGGSASTALAQRRSAAEGPQEPMHARGRRRMQTGGYWVRNGACLSSSSCSSNGWCESASTWTSTGGCGSSKTVSTRVSASSSCRNTGCWPGGCNSDEVEVSSTRCWWGPYDERCCKKVTTSTCRDWLGCSWVSYPSPPPRSSGGSSGTVAVFASGGAWDAYASSHKPVNGYIAAILANHAYVDGVGASRTNLYDWMSKSWPKVGSPLGASRATYAIGGQGMAWVMYETRDTIFVAIRGTEPSDANDVANDLDVGWANAHSYFGNNACIMKGWYTIFTANVASFRQEYDKFVAGGSGSGKKLWFTGHSLGGVMATLFAAYMQKNGYSVQGVYTFGSPIVGDEDWKAAYPLGSRT…
>CRv4_Au5.s14.g5379.t1
MGGPRRSVDTSESRSTLHALRRQAHRARDHVSNTWKVWKSQPNSSELVAIALVYLVQGVTDLAALAQKYLLKDELHASPAQVTFVISAGNVPWAIKPAIGLVPAGLAGAVGWLLLALPAAWGGAGSMAGVLGLIVAVSGASAVSDVVVDSMVVERARREAQADSGSLQSLCWAAYAVGQVGSAWFSGSLVERLGPRPVFALTALLPLLVVLVGVGVRERRGPGVLELMRRLWRGERGGGGVGAEAGRGADEDEEDLRVTSLALWDTVRRREVAGPVLFLFLSSATPAADDAMFFFMTAPAPTGLGFSATFLGDVALAVAVASLAGVGVYHAFLRRLPLRRVLLWGSLLAAACQASSLVLATRANVALGLPDHLFALGDSVLVSVIQNVLFMPTMVLSAR…
>CRv4_Au5.s14.g5384.t1
MRTWHVVALAAVVRAVLICWAEYQDSRMAVKYTDIDYVVFTDAARFVANGGSPYQRATYRYSPLLAYLVLPNIWLHPVFGKVLFSTADLLVAGLLSHLLRATGASPRLRAIATAAWLFNPYTATISTRGSCDVLSVLLLLGLLVMLLHGADVAAGALYGLAVHFRIYPVIYGPAIVLFLLRRAAVRQGLVRLRPGNASSSSSSSSSSTGGGGRGSLRQWAGAVRPAAAFCLAAAATFAVLGAAFYYLYGNAFLNEAFLHHLGRKDPRHNFSPYYYPIYLQGYAAAAPGSSSSSSAAGLAAGGDGATSMPPPPPRPGQDGAATAAAAAVELAARLLQPLWGLMERLLPLQEPWRLAAAPQAVALMALSAAYHADLPSAWLLQTWAFVTLNKVVTAQYFVW…
>CRv4_Au5.s14.g5398.t1
MGAHGGGLGEPVDNWIKKLLVGVAAAYIGLVVLVPFLNVFVQAFAKGIIPFLEHCADPDFLHALKMTLMLAFVTVPLNTVFGTVAAINLTRNEFPGKVFLMSLLDLPFSISPVVTGLMLTLLYGRTGWFAALLRETGINVVFAFTGMALATMFVTLPFVVRELIPILENMDLSQEEAARTLGANDWQVFWNVTLPNIRWGLLYGVILCNARAMGEFGAVSVISGNIIGRTQTLTLFVESAYKEYNTEAAFAAAVLLSALALGTLWIKDKVEEAAAAESRK
>CRv4_Au5.s14.g5402.t1
MLPRTRQTFMVAVSFLFLCTRYGLLVVWAYCCGSLLLARLWEGLPFAWLSPGLAFLDTHRGMLRWHIHYNLMILRLISFASDLAWARNARRATPGGRGPLQPAQAPVPAALTAVRAGEDSSGSGLTASGGSEGESNSGGSLAAVPSSIGSLDQEIKARVEEPLPLCQYSLAGLLEYCLYPPLYIAGPIMSYNCFASQRAPGGAVRHLGRRQLLLYAARAALVLLCLEAVTHALPYNAIARDRALDKLAARWAGDPAGAAAAGLPRPRPLHYSITGYWVLVFMWLKFTFIWRFFRLAALADGVAPPENMTRCVCDNYDVEGFWRNWHASYNRWLVRYMYVPLGGSAWRAANVWVIFTFVALWHDLEWRLLGWAWMMAAAIAPEMAVKALGRSKLLRRWHG…
>CRv4_Au5.s14.g5412.t1
MEPGQQPLVVAVRISPAAGWAGDDAHTYAVSMLAVLCGMGFVAASLLFGALVSWRRNKMLLETLLPKAVLKDLRGEDTSVLGAAQMRPTDTPADTLLSILADLLEGVTPDLRDVVLVRTAVQRNWDVYTPFNLRSHIKGANLDADVAQALMQQLMGSEFGGTPYDSMYGNGVHGGNGTGHGMRGYSSAVGYKASLSGMGQGSGGFVRHISGLLPYNMDTMAGALQFILSSDASCGDPAPSGSLARPLGAAYAPAAAATAAVVAAGMAIGGGGGGGGGGGGGAPLVQGSLYDTAAAIPEGSSVERLLAKSDNWEFDMWELQDVTQGHALSVLGFYLIQRAGLMDRFKIKPVKVARLLRAIESGYVDNPYHSAIHAADVLQTMHVIIHAAQLHVHYLDALG…
>CRv4_Au5.s14.g5413.t1
MTEGKHSIVFVEPPAESSGLHSEASAGHTTGWRQQLKSSALGVWRIVVQYPVSTLLPPLLLLGLVLGLGVRAYSLTQDTAAYYQREMIGSVVAPVLVTSAMVSSGELAKVHYNPNYPDASGLFEGLASTLLAQTSNKYAGAVELQLQPFGVVTATYPADNSSTSRGSAPLGYDIFASPERDMAIKIVRSGSVTLAGPMDLMRGGYGVTVSMPIFISGVPENTTASALVWLDIFGAVDSRVALLTERGYVYEVLVPDGAGGLARITSNIDGPLPNDSVEVPVQLPNTQWVLRVHPTGDWMPAWYAGLLAGVIVLAVVVALLTFAVLVSRRQHQTLLEAVLPKEVIRELRKEDTTTMEARILQADTPADMLLMLLGELLEGRTPDLRDVVFIRTVLMRNQD…
>CRv4_Au5.s14.g5413.t2
MLAPHPWQASALVWLDIFGAVDSRVALLTERGYVYEVLVPDGAGGLARITSNIDGPLPNDSVEVPVQLPNTQWVLRVHPTGDWMPAWYAGLLAGVIVLAVVVALLTFAVLVSRRQHQTLLEAVLPKEVIRELRKEDTTTMEARILQADTPADMLLMLLGELLEGRTPDLRDVVFIRTVLMRNQDVYAPLNLKGHLRGSSLDADVVRALMRQLGSGGDFESTSEYGSGRIAEEVEAGGGGADSDSGGHGATDSGYSKSDPYSGQPADSVEGALSLILNVQPYHVVRSATSEMGALCGVVGAQHGLDSERCSPALGAFDVEPSGGAITGVTVAASLSSVVEGAAVAASGGSAEPRSRWRGKKTPLMLSSNGRPGLPPGPPPAPPQPVVIPPIIIEDSERLL…
>CRv4_Au5.s14.g5444.t1
MPVLAKLLGGASKASSLQQLAGLGQRAALAATQQAGFASQSYPVIDHQYDAIVVGAGGAGLRAAVGLSELGFNTACITKLFPTRSHTVAAQGGINAALGNMTEDDWRWHAYDTIKGSDWLGDQDAIHYMCREAPKAVIELENYGLPFSRTEDGKIYQRAFGGQSLDFGKGGQAYRCACAADRTGHAMLHTLYGQAMKHDIQFYVEYFALDLIMDSDGVCRGVMALCMEDGTLHRFQAHQTVLATGGYGRAYFSATSAHTCTGDGNAMAARAGIPLQDLEFVQFHPTGIYGAGCLITEGSRGEGGILRNSEGERFMERYAPTAKDLASRDVVSRSMTMEIREGRGCGPEKDHIYLHLNHLPPELLAERLPGISETAAIFAGVDVTKEPIPVLPTVHYNMG…
>CRv4_Au5.s14.g5467.t1
MQASLRARARPFTSGAQPSLRRAPARVCRPVASAAAAKGPVVVVDNYDSFTYNLCQYLGDFGVDYVVYKNDEKTVDEIRAMNPRGILVSPGPGRPIDSGISLQTVRELGPDFPLFGVCMGHQCIGEAFGGDVVRAPCGVMHGKTSPVFHTNVGLLEGLPNPFEACRYHSLVIKRDTIPEDLEVTAWTEDGTIMGVRHKKYPHIQGVQFHPESIITQSGKKIVENFVKTL
>CRv4_Au5.s14.g5468.t1
MPARCLSGVSSRAQQPLLSSGQTSAQLPIQSHRCAVITQGQANSSLRLPIELDLETPLPGFDSISSALADLAAGKVVVVIDDEDRENEGDLIMNADKVTTETMAFFVEYTSGVVCISMEGQDLDRLKLPLMINSAENEEAMYTAFTVTVDLRDDITTGISASDRAKTIRRLADPSATWTDFRRPGHIFPLRYRPGGVIVRPGHTEAAVDLARLSGSFPAGVLCEIVNKEDGSMSRTPQLLEFAKRHGLKCITIADLIRYRLRNEAIVTPAGEPTPLTAASGARLTAQAFRNAVDGTEHVAFVHGAVADSASDVLLHVHHERTVADLLDCAAPGTSAGGAADCSLPAANASSLDGALRSVAAAGAGVVVYLRGQSARGLPPSAELAALGSGGAGAGALYS…
>CRv4_Au5.s14.g5492.t1
MALVARRAAVPSARSSARPAFARAAPRRSVVVRAEAGAVNDDTFKNVVLESSVPVLVDFWAPWCGPCRIIAPVVDEIAGEYKDKLKCVKLNTDESPNVASEYGIRSIPTIMVFKGGKKCETIIGAVPKATIVQTVEKYLN
>CRv4_Au5.s14.g5494.t1
MLNAQRVALKGRAFQPCAPMVAVRGRRALAVRASGDDAFANYKPTIAALFPGQGAQSVGMAKDLVATVPKAKEMFDKASEILGYDLLKVCAAIDAIDVACGLSLGEYTALAFAGAMSFEDGLRLVKLRGESMQAAADAQPSSMVSVIGLDSAKVAELCKAATEQVGQDKPVQIANYLCPGNYAVSGSKEGCDAVEKLGKSFGARMTVRLAVAGAFHTSYMSPAVDKLKAALAQTNIVKPRIPVVSNVDAQPHSDPAVIKDILSRQVTSPVLWENTIKSLQEKGLTKSYEVGPGKVIAGIVKRMDKGANIVNITA
>CRv4_Au5.s14.g5496.t1
MVRKGVIIGVGAAVAAGGIGLYAYNVLKNSKNGSDAPAEAATATREAPAAAPAATAPTPAPAAPAAAAAATPVAAAPAVPAAPAAAAAPAPAAPASSKPDLVVSVLKSNAALLSDKERALVAGLLDLDQGHLFEGWPEKGTDDASKRRLLTQLCVLDASYHGGLAAYVANARQLLRDSKEGVNPFEGYVPAVPAGERLDFGSGPFLALEAEGLAQAGAAAFVLVAGGLGERLGYSGIKVALPSECATGTPFLGLYIQTILALQAKVAPGSLVLSPGAVLVLEGADISIQGPVKVDGALVVRAAPGARVTLGPLAVSNRGWTWAPLAEGEAASEEERIRGFKVVRTETKELVFDKPGTYTAADPAPAPAPAPAVAAAPAPAPAAAPVPAAAPAAAPAATS…
>CRv4_Au5.s14.g5515.t1
MVDLKFKYPMAVAAMGMGFASIACYIYCDLIKAVPPATAVDARFYWTRIFPVGACQGLTLFLGNQMYFYLTVAFIEMSRASLPVTTMLALWVAQLETPTAAVIRAVCLTAVGCAIAAYGEVHLSLIGGLLVISNLSMESLRLVMTQYLLVGCDMHPLQSLKFIAPAATLTLLAGSAVREYPGMVANNAGAIVARYPLHFLLAACLGLVVNVLGVVIIKLSSATTLKVLAAVRGPIVVMCGVLLFAEAVTMIEFFGYSIALGGFIWYQYALTQKAAAEAAAKAPALAKP
>CRv4_Au5.s14.g5567.t1
MHAANPSQRAALSQRADAANAHQRLALPLSSRPLHRSSVFSSRRLPILQAGSTDTYSRPISAPRLVQHKSEAYWFYAGLSQVYDHIVNPGHWTEDMRDDALAPAKLDDPNLKVVDVGGGTGFCTLGVVKTVKPENVTLMDQSPHQLAKAKAKPALKGVTILEGDAEDLPFPTDTFDRYVSAGSIEYWPEPQRGIREAYRVVKEGGLACMIGPVHPTHPVSRFFADAWMLFPTEEEYIEWFTKAGFTDVKMTRIGPKWYRGVRRHGLIMGCSVTGVKPKAGDSPLVMGPKAEVSGKMNTNPLSFLLNLILGTAAGFYYFCLPIYMYIKNLIWPKNWEM
>CRv4_Au5.s14.g5591.t1
MAMAMRSTFAARVGAKPAVRGARPASRMSCMAYKVTLKTPSGDKTIECPADTYILDAAEEAGLDLPYSCRAGACSSCAGKVAAGTVDQSDQSFLDDAQMGNGFVLTCVAYPTSDCTIQTHQEEALY
>CRv4_Au5.s14.g5595.t1
MTGKKVIALFDVDGTLTAPRKVATKEMLDFMQELRKTVKVGIVGGSDLHKIAEQLGDGLLTQYDYVFAENGLVAHKEGKELAVQSLKTFLGEDKLKEFINFVLHYIADLDIPIKRGTFIEFRNGMLNVSPIGRNCSQSERDEFEKYDEKAGVRKAFVEVLRTKFAHLGLTYSIGGQISFDVFPQGWDKTYCLQFLTEFDEIHFFGDKTYKGGNDHEIFESERTLGHTVTSPDDTRKQCTEIFLA
>CRv4_Au5.s14.g5596.t1
MLHCPATPSHASVPSSGTYLGPGRLPAPAPLPLNPPLPTDKLSCKAASTQPRTPVVLVAAGSFNPPTVMHLRMAELAADELLRRGYDVWGVYFSPVADSYGKAGLAPAADRVAMCRLAAAATSTAATSAVVREGAHVSGSGGGGSKGYGGSGGGGGHGSSGVGGRDGAGPVAPLPAGGGSEAIQPRPQLQQLQPPPSQQHQLLPQQPQLQLQPSKLQPLLLPDPEPDLVMVDGWEAAQPGYTRTLAVLRRVEGELRAWLLQAAGAAGAGTGPEAAEAAEAEEQEGQRPPPAVGGGVQAAQAGGPGQGQGQARASTGVVQQQQDRQDRQQQQERPVRAMLLCGADVLASMASPGVWRNPDVILREHGVVCIARAGSPLDGLLSTPGNVLHDHRDRVVLVY…
>CRv4_Au5.s14.g5615.t1
MQQQLRCSRVASSRITPRTRTSMVVMASAKPKLQLMVNSCTGKMGQAVAEAALRAGVELVPYTLCGPADVATNATVNVAGHALTLVPPSTRDAVVEELKGRYPHLLMVDYTLPDAIHSMVDFYVKHRTPFVMGTTGGDRAKIAAQVEASKVYAVIAPNMGKQIVAFQATMDLMAKSFPGAFSGYKLRVVESHQSTKKDTSGTAKAVVQSFVELGVPFDVSQIELVREPKAQMEVMKVPADAINGHAYHTYQLVSGDGTVMFEFQHNVIGRTTYAEGTVDAALFLAGRIDANDDKTLYNMIDVLRAGAMR
>CRv4_Au5.s14.g5651.t1
MNLSTEAAPPGVRADVQGAGPFATAGPQPIDKYMWLRDLRMASPSSYFRVLVNNTLDVLPYIYTPTVGKACQEYHTLGIATRGLYLRIDQDKGKILERLKAWPQKRVRTIVVTDGERILGLGDLGANGMGISEGKIELYTAAAGVNPAVCLPVCLDVGTNNVKLREHPKYKGVRAARPPQKEYDEFVQEFMEAIRAWQPHTLIQFEDFGNTNAFRILDKYRDDYCCFNDDIQGTAAITLAALLAALRVTGQRLADQRILFLGAGEAAAGIATLISYCMTRRDNIEPAAARQRCHLMDSKGLVIASRTDLQHHKRPFAHSDVPPCTTLIEAVRAIKPTVLIGASAVPNSFTQEVVEAMAELNARPIICPLSNPTSQAECTFEQAWKWTNGRVLFASGSPF…
>CRv4_Au5.s14.g5652.t1
MADFGKALLDAAGAFPLDKYRFLRRLRETSTEQYYQLLCYYTQQVLPYIYTPTVGEACQQYHALRIQARGLYLRIDHRRSILSQLKAWPQKDVRVIVVTDGERILGLGDLGANGMGISEGKIELYTAAAGVNPAVCLPVCLDVGTNNTQLREHPVYAGLRAPRPIRQQVYDEFVQEFMEAVKIWQPHTLIQFEDFGNNNAFRILDKYKDDYCCFNDDIQGTAAITLAALLAALRVTGQRLADQRILFMGAGEAATGIASLISFCIHRRDGVSEQAARQRCHLMDSKGLVLASRTDLQHHKRPFAHSDVPPCATLIEAVRAIKPTAIVGVSAVADAFTPEVLAAMAELNDRPIIFPLSNPTSLAECTFEQAYRATNGRVLFASGSPFDPIVDERGIAHHP…
>CRv4_Au5.s14.g5665.t1
MASSAATVPQLPKRKLGNTGLEVSVMGFGASPLGGSFGPVDEAGAIAAVHAAFAAGVNFFDTSPYYGATRSETLLGKALKDLPRDQIVLATKVGRYGLNVEDFDFSAARVTASVHDSLERLQTDRLDLVYCHDVEFGDLDQVVNEALPALAALKAQGLVRHVGISGLPLGAFRYVLDKAPPGAVEVVLSYCHLCLNDTSLQQLLPYLEAKGVGVVAASALSMGMLTKAGPPEWHPAPPALRAAAAEAAALAESRGQRIEALGLRFAFKQPGVATTLVGMTTPDMVTQNVDAVLAALGIKKPAAADGEAAAANGEAAAADAAADAVVAELEQLFVARGVKDVTWPSGRPLPAGY
>CRv4_Au5.s15.g5776.t1
MALRNAASFLGKSLAGAAELGFSAAKTAGGEALTNAFVTDGVRHASNQAVKQRIRAIKNIGKITKAMKMVAASKMKNAQVAVEQSRGIVNPFVRLFGDFPAIEGKQNITVAVSSDRGLCGGLNSNIAKYTRALLKMDPTTSETTKLVSIGDKGRSQLMRTNGEMFTHTFSETYKVRVTFAQASLIAEDLLKSNPEAVKILFNKFRSAISFKPTLATILTPETLEKQLTEPSGNRLDAYEIEASHERSDVLRDLAEFQLAATLYNAMLENNCSEHASRMSAMENSTKSAGEMLGKLTLEYNRKRQATITTELIEIIAGASALMDA
>CRv4_Au5.s15.g5813.t1
MLLSDVRIAVIAGGLTAGAQVKKLVRSAQREQRALCAEVEASRGGGSSRRTSTVRIAVDKRFLRRLLVILSICVPSWWSKEAGLILAQGGLLVSRTLLTDWISRIEGYSGSTLVSQQFDKFWRSLGMFALIGIPAAVVNSGLKYMQKQIELAFQERLTSFLHAQYCSNRAYYAASTLGGLTHADQRITEDVEKFAASISELYAHTFKPLLDVVLFTRSLARTMGYRGQFMLYAYYVCVAYLLRAISPPLAAMTAQEAALSGAFRAAHQRLVTCSEEVAFNDPPAGAAEQLVLNQHLRRLLRYTGLSAAQRGIQQVADGYFVKYFASVTALVVYGLPIYFQDPSRRGSQGELTRDYIRSMRLLQNTSRGVGDLILVYKRVTALASHTSRVSELLEQVARL…
>CRv4_Au5.s15.g5828.t1
MRTSLLRSLGKGLGLCAEATSSRVAQQTMPAVAAMSTSASDAEPTSKAAHYAAALGGVMAGIFGASCVASANEAADGLHAPHYPWGHEGVLDSYDHAAIRRGHKVYQQVCAACHSMQYLHWRQLVGVCYTEEEAKALAAETEVEDGPNDEGEMFTREGRLFDAFPSPYANEQAARYANGGAYPPDLTLISGGRHNGPNYIFSLLTGYRDPPAGISIREGLYYNPYFPGGAIAMPKMLVDGGVEYEDGTPASASQQAKDITTFLAWASYPYQDEMRVMGIKACLMISILIGFAAYSKRLRWAPIKSQRIVMDVVN
>CRv4_Au5.s15.g5921.t1
MQGQREAPFTYAALIPIMLGVIVASGGEPAFHVIGFTCCVAATALRALKSVVQSILMTDPAEKLDPMSLLLYMSCTSILFLLPLTLTLEPNSFREAAALAASSPSFLYWLVANSCLAYLVNLTNFLVTRYTSALTLQVLGNAKGVVAAAVSVAIFRNVVTAQGCIGYGVTVAGVFLYSECKSYNAAATATAGRAFEDDEAKDLTDREPLLTSKFVHTGDMQVHNCSKHPPTSRA
>CRv4_Au5.s15.g5929.t1
MASEKSSGTFAVKVGLAQMLKGGVIMDVTTAEEARIAEEAGAVAVMALERVPADIRRDGGVARMSDPTMIKAIKAAVTIPVMAKARIGHFVEAQILEALGVDYIDESEVLTPADEIHHINKHNFKVPFVCGCRDLGEALRRIAEGAAMIRTKGEAGTGNVVEAVRHCRAVMGAIRQLQTMDDDELYVYAKEIRAPVELVRQVKTLGRLPVVNFAAGGVATPADAALMMQLGMDGVFVGSGIFKSGDPASRARAIVQAVTHYNNPAVLAEVSSNLGEPMVGIDIREKGFNSYAQRSE
>CRv4_Au5.s15.g5960.t1
MCTTSSLHSHEDSVILPPIPSNDDTSADPEVWDVIIVGGGVAGSALAYAQAKDGRRVLLLERDLSQPDRIVGELLQPGGYLQLKKLGLEGCVEGIDAIKVYGYALFKGGQQAVVRYPMEGYSADVAGRSFHHGRFIQKLRGAAASCPSVTVRQALVKKLVNDKGGEWQEGEVVTGVVYRHLPAGTGPESAPVERSARAHLTLVCDGMYSNLRKHLSTPKIAHPSFFVGLRLTGCTLPVPGHGHVVLARPSPILFYPISSTEVRCLVDVPGEKLPGDLPAYLRATVAPQLPDVLRPAFLEALERPEAIRSMQNKLMPAKPLHQPGALLLGDAFNMRHPLTGGGMTVALSDCSLLVDMLRPLPSLADAFGTAQQTADFYTRRKPLSATINTLANALYKVFC…
>CRv4_Au5.s15.g5977.t1
MQTQRPLASPGRQASIPARRAYSLRPPLTQRQLPIARAEPPQTEEIKLFGIIPTAPRSSKLGENLEDRIQSGEFTDSGSTKEKLTRPLRQALAKEPLVGRSAARFLADLGRQWRAEASKRMPEARGDIREIVGQPVFVPLYKLFLVYGKIFRLSFGPKSFVIISDPAYAKQILLTNADKYSKGLLSEILDFVMGTGLIPADGEIWKARRRAVVPALHRKYVMSMVDMFGDCAAHGASATLDKYAASGTSLDMENFFSRLGLDIIGKAVFNYDFDSLAHDDPVIQAVYTLLREAEHRSTAPIAYWNIPGIQFVVPRQKRCQEALVLVNECLDGLIDKCKKLVEEEDAVFGEEFLSERDPSILHFLLASGDEISSKQLRDDLMTMLIAGHETTAAVLTWTL…
>CRv4_Au5.s15.g6002.t1
MRTECLHLSARKARAFAAVVRSAPGVLIVVPCLTFILLAGAGVITVMLSAANNVNQAKANALSLAQGAAVQYRQQLLFAASPVEVFAAVVRANPSQYDRVTLRFNVTAPALLNSAPPGTITSLRLLPSGRLRLSYPPDEKLLGFDAFAGGATANSRLYADTLSVTGPVPPIKGEEAAGANLLVRRAIYVPINMMSNPDDNFGRPDIPNPLCGDPCAYNETRGTVLWGFVTSVVSIGALDGVVGQVDNSSIRSSNSSTGFISASRDQAFLTPAESALRALAGVGLAYRLTTRTGVVVAASGAAGELPRDAVTAPVELAGLEWTLAVWQAQGWRPAWVGGALAAVFVFATLSSLLLAGMLVSRRRHAMLLEALLPRDLLKELNDTHAETLGPAGPLNGASS…
>CRv4_Au5.s16.g6038.t1
MASVAAASFPSAAAAAAATAASPGGAPRDPAALWRQIASVYDKAQVSGACSKTDTQVEMCRDAGLGVEFVLRVATALKAKPNGPPQPAQDKAAAAPSAPAPAPWRNPFSPPEPELTVGPLGPTGTHTAVLNKFNVVAHHVLVITNQFRSQAEPLHGADLAAALEVLQAMPEGGVAFYNCGPESGRSQPHKHLQVVPLPFMDGQPPRAPVDGLVEAAAAAGPGGGAAPLQPLQLRQLPYQCFATQLPDSPSPEQLGAAFDKLLQLAFPGYSYSPPPAMAALPPGASPTDAATAAAVAAGSVSYNVLMTRQWLLLAPRRTERCGPLALNSLAFAGTILVRSEEELGFVREKGPGSILAEIGVPW
>CRv4_Au5.s16.g6042.t1
MIGWINLSVEAFICDSFGRDAWLKIIEQAHVDCNWVSSCPYPDKVTYDLVITGAGILGVTVPQALEAYGAYFVNYVIKQGYLRLLQSLGSNIAEFLANLNNLHLHLTMGFPSMVAPAFRVEEVTGTSLLLHYHSVRPALWPIVVGVLKGASQKLFGHDVELELVRSREAGDCDHEVFRVTYPHQESLSHWDDHGAALASTYAMPRDFFFEMFPFHLLLAQDCSVLQAGAVLRRLFSSLTPGSAVSDTFKLRHPFIPFEWDRILLEADTLFLLKALESGLELKGQMVKTQMPDGTPALLFLGSPRLANLEEMNGHGLYLSDIPLHDMSRDFVLLAEQRQAEADLKERFEKMAVELRQANERLELTTRWLDEEKHRSDALLYRMLPADIAADLREGHKVEP…
>CRv4_Au5.s16.g6063.t1
MQCVSRVAQRSAVSRPRVASRQAVKVQAVKAESKAAMAAVAAGASTLALALAPAAQAAQEVAMLAEGEPAIVQIGWAATCVMFSFSLSLVVWGRSGL
>CRv4_Au5.s16.g6072.t1
MATEQSYIMIKPDGVQRGLVGEVIKRFEQRGYTLKGLKLMNVEKSLAEKHYEDLSARPFFPALVDYICSGPVVAMVWEGKGVVATGRKMIGATNPLASEPGTIRGDFAIEVGRNVIHGSDSVESATREIGLWFPEGVAQWTPVAKPWIYE
>CRv4_Au5.s16.g6082.t1
MLQLANRSVRAKAARASQSARSVSCAAAKRGADVAPLTSALAVTASILLTTGAASASAADLALGAQVFNGNCAACHMGGRNSVMPEKTLDKAALEQYLDGGFKVESIIYQVENGKGAMPAWADRLSEEEIQAVAEYVFKQATDAAWKY
>CRv4_Au5.s16.g6096.t1
MSIADVLEGKDYSFPKEEEKILELWDRLDAFNEQLKRTEGKPEYIFYDGPPFATGLPHYGHILAGTLKDIVTRYASATGHHVTRRFGWDCHGLPVEYEIDKKLNIKSRDDVMKMGIGAYNEECRSIVMRYSKEWEKTVKRLGRWIDFENDYKTLDPSFMESVWWVFSRLFEKGLVYRGFKVMPFSTACSTPLSNFEAGLNYKDVSDPAVMVSFPIVGDADGASLVAWTTTPWTLPSNVALCVHPELIYVKARDNDKKKVYIVAEARLAAVPGAVPKPKKGAKKDDKPEGGFEILAKMPGSELVGLRYTPLFPFFSALAAAEGSSKGAFRVVSDTYVTDDSGTGVVHQAPAFGEDDYRVCLAHGVCEKGDSLPCPVDLNGRFTEEVGQFKGLYVKDADKE…
>CRv4_Au5.s16.g6105.t1
MWEIWRSRSYQHLTALGVQRGGQARTETGGWLHGTHSPEASTPTSGIARIASGTVNFKDLSIRADDPDEGDDDDRHSEDSTNKSAILLKPPKIPERTKYVIILVGLPGRGKTFLCNKLKCYLNWLGHNTRHFNVGSYRRLQKGDHEVQNAAFFDAHNPAGMEARNRALYAALDDLRSYLYSPEGQVAIFDATNTTEERRQLLIREFHGHFQYLFIESICTEPKVLEQNYRAKMQYSPDYSGMDMEQSLADFKARISKYEEVYEPIANRNIHYIKLIDMVTGRGHMDVNRISGYLPGKIVFFLMQVCKAGMAQARRIWLTRHGQSEYNQVDRIGGDSSLATPGEVYARCLPEMLLERLPLVGLERARIEEIVAGVAAGTGGPAATSAPDPNADPADPGPE…
>CRv4_Au5.s16.g6119.t1
MFLYIMNMVVLGLAGYFCGKLFDLVKKLSDEYTAPIACTLEDPDSTTPLASPSIFEAPTKALSCIIPAYNEQDRLSTTLDEALNYLQRRRDKQGPQFTYELVVVDDGSKDGTANVARNYIRQYGLDTVRLLRVSANRGKGHAVKRGMAAARGEFCLMMDADGATRFADLEKLEGEMEKIMQPSFGASKAAAAASGDSQGELGVVFGSRAHLAQDAVAKRSPLRNFLTRGFHALVYFVAGGRIRDTQCGFKLFTRRAAAVLFSNVRLQRWCFDVELLYLAEQLGIPVAEVSVNWTEIPGSKIRFTSILLMATELLIIKMCYPVLGIWSIHSELTMAKKTS
>CRv4_Au5.s16.g6129.t1
MPTEYQQTLWASFTIAGVGLHSGEYAVVRVRPAFAGEGRYFVRVPEGTNAARGEESLVRMLEAGAGKQPEEEEAMDDTATREYKRELIAAYQEYVDAQEDDGFNGTFADYMNGKSYVALLQRLREEGPPRFSFSEAEAPQPRGEDEPYVEAALANITEPNPFTTALAKGDVEVLGVEALLSALEACGVDNARIEIEGGAEVPVIDGSAGGWASQIQTSGLTHALPRDDLPVPGGEFPAPADGEEAAAGDAEARKQRVCKMVLRPQEVVSVQRGASFVTLYPEDTFRLTVGLDRHLEAPVIGKQWFSWCMFEDLHYMHSLADARSWVSSPQQAMAMRDAGWLLGGTEGAMLIGNGDSWYDHTIVRHPRDEPARHQMQDLIGDLSLLARHGHSGLPLGHVV…
>CRv4_Au5.s16.g6147.t1
MAELEKTFALIKPDAVRAGKAQEIMQLIELNGFTIIAKQKLQLTRARAEEFYGEHKGKEFFPKLVNFMTSGPIWALVLAKPGAILAWRALMGPTNVFKARAEQPKCLRALYGTDGTQNATHGSDSPISAAREIKFFFPTLSGDPTIYAEPTAAAEYITKRIQPALAKALAALAREKPSADKFEAITFVAGYLLQNNPNKPKVLMPDEWDPALMGDDEDDEADFINARLAAPTGNDGATKAEFDAMVEAAKADTGGAAPAQEFVYPDSKPTTPVVPAPPAPGSKPPSASGARPQSARPTSARPPSASAAPPAPLAPVPPPASSSRPASGSGRPPSATARPPSATPPPPPPAVELEEADDPAQLDEAATKVQAAFRGYQARKEVAVMRSEAQPGEAAAEPE…
>CRv4_Au5.s16.g6190.t1
MQCSTMQQQKLAGRREAKAAAQKACAGVRVAGASARVPVSTVRQATSSVRAASRATSVKVQATATVEKATAPAGSLSSNGAGTRVMIIGGDGYCGWATALHLSARGYEVCIVDNLCRRQFDLQLGLDTLTPIATIHDRVRRWGEVSGKHISLQIGDICDWEFLSQAFTSFKPNHVVHFGEQRSAPYSMIDRQKAVFTQHNNVIGTINVLFAIKELQPDCHMVKLGTMGEYGTPNIDIEEGYITINHNGRTDTLPYPKQGNSFYHLSKIHDSTNMLFTCKAWKIAATDLNQGVVYGVRTDETMADPLLLNRYDYDGIFGTALNRFVVQAAVGHPLTVYGKGGQTRGFLDIRDTVRCIQLAIDNPAPKGEMRVYNQFTEQFSVNQLAEIVEREGKKLGLNV…
>CRv4_Au5.s16.g6192.t1
MSKTGPQKVELEEQATEEQQRRGVSAGEPAFRDVFAHTVKPNQKKNVVIRGLEASFGCVLHGEYASNEIRTAKYTLLTFLPVNLFEQFTRVANLYFLVIAILQFIPGLAPTSWFTTVAPLVIVLTINAIKEIVDDFYRHRSDNEVNNRTVLVLEEGGKETPVPWRDLAVGDIVKVMNDTEIPADLVFLSSSDAGDICYVETANLDGETNLKIKNCFSKTAGKHLADELKEFAEDSVIRCELPNTHLYRFEGAVMKRADPDAAEHQLPLTADNLLLRGCSLRKTDWVVGVVVYTGIESRIMMNRTPSPRKVTQLERHMNILVMTMFILLFVISALMSMGEIIWQKAHARDDWYLEFTGKYPDFYPSFRGWVIGVVRWVILLNGVIPISLYVTIEVVKVFQ…
>CRv4_Au5.s16.g6208.t1
MAGKNEGARWLALDPSKRWTEVFFLAYSPFWIIWALVLLVPFQLFEYCGNYGYMLIGISCAAPTFILPLFIRCKADQGKPMWQRFWVKANIWIAIFSFIGNYFWTHYFYKVLGASYTFVSWRLNDVPITLYLMTHGYFCFYHVVSNVLLRRVQTGLAKSSWLVRRTAMGLVVFALSYATAFMETLTIAHFPYYTFVDREKMYTVGSLFYAIYFFVSFPMFYRMDEYPQKRGSKWTSSEAALDSLAAGMLVTILLDLWRIGVGGIVDGKGAGLPWM
>CRv4_Au5.s16.g6221.t1
MHKLNIDTQHLQSASSEEVHTPTENDLLISRLVARIAELEERLYKKELEAPAVATRTPGAAAAAPTSTPGTAFEQFQQQQQQQQQQSASASKLKDSILNTLRESWAKLEAHASNPNNAQAAAQAFGAAASPIPAALLTTTPKGQREGGSAAGEQQQQQQAGTPSGGGGGGGAGAPPLRTQSSHGLQPGGNSFQFSTPLVVDYSRPNRSASGTDLAATAAATAAATAGATAGRGGKADGGREGGGDGADVDVDVDDDNASLSSVDSTGMGYEPAAEAAPTAEEREQTERERQRRQSGGLAGTTARPSGGLGGSGSGGGGGAGAEGGGRPPLPPVAARAGRNNSSDGGGAGSQPPLSPQPTFSLQQQQQLQYQQQQPQQQPQQQQSRAAAFTGSVLSKLGI…
>CRv4_Au5.s16.g6223.t3
MAAKPGSAGGAAPPPAAPAPPPVLEKKTLAESRFLRFVNVDYARPGDNAKSSWQYVERTTRRGDVDAVNIFAVLKKKDGNHQVLVVKQYRPPMGKHTIELPAGLVDKDESPQTAALRELKEETGYVGTFIGATGQQALSPGLTNENMVSVTIFAEIDPELPENKNPKQSKEDRKMGITREWLPLKNLHHTLAAYEAQGWGVFAGLYAVAHGFYLRERLGL
>CRv4_Au5.s16.g6229.t1
MIVRRPMLTARAPARVAVAPLRTRVISHFKVTFKTPKGEKTIDVEADKYLLDAAEEAGMDLPYSCRSGGCSTCCGKLESGTVDQSDQNMLDEDQLKQGFVLTCVAYPTSDIVILTDQESKL
>CRv4_Au5.s16.g6244.t1
MLEWSEQYNGVYAMEIVGRKYLVVTEPSLIAGIVGRGSAGLPKSTGYAMWDSAISPHAGVQGLFTVAENTTTWRAVRRAYGPAIGPGSMSLHYPIILQCVAKLGDLLEQSYHRQQQQQQQSQQQQQQQHAAVYGDSSGTSTSTSSSSTASINSTTGLTSHEMNHLAKCLTLDMLGLSAFGIDFRCLDDPAAAQLPSLIESAMHECGERARSVGRRLLPWLYEEEARAGAADMAAFHALVEDVWRQIRARGAPTEDDNSFGAQLLRLADPSLAPGGAALSDEQICAEIATVIIAGYETTANTLTWMLYGLHAHKDASEQLVAELRGAGLVPDTSSSSSPSSVDPTTASFASLAGAHEALGGLPVLDAYVRECLRLYSTAPNGLIKEVPKNGPPARVGPFA…
>CRv4_Au5.s16.g6245.t1
MTSNTFTQEEVAKHNQAGDCWIIVARNGQRSVFDVSNYLRSHPGGSRIILEGAGTDMTQQFFSVRHSPAALRALDRHFIRLLEPPPGPESFWGCLSTWFKGRTPATALTAST
>CRv4_Au5.s16.g6246.t1
MANTAPVIPFNVLQQHASSSSCWIVITRDGQRRVYDVTNYLEHHPGGKAVIANLAGRDATREYDNTGHSKAAQRLLDRYFIGLLEPGAPLPESCHGAAGKAEKPGIFKRLFSL
>CRv4_Au5.s16.g6247.t1
MAPSGKTYGVADLKQHTTEKSCWLVVHGKVYDVTEFLEEHPGGYDIILTSTGKDATQDFEEIGHSNSAKKLLEKYVIGEFEGGDSAPAVAKVPPQSANAAKQQPAKSAATRTFHVILPLLILALALALNFYMMSQKKSA
>CRv4_Au5.s16.g6257.t1
MKRFAASTRKVGAARLVVDSLKRVSLTFIGDDHQLNYAVAKVVGSRLGWFPVDGLKVMTGMRKVPDLAALTEPERVATEAELLRGLRNQFRVIATPLPAGAVLQDAVWKDLWGSVIVWIDEDDKSTPKPRTPERQLYEDRAELAVRVKVQKGFGVRGGQTLEGRARAVADTLLPRLSDFLAEKPELTERKRQYVERGCRGDWPELQPAEGSPVVAALDRKPLAGFEEEQEQQQGQEQQQGQGEQKQ
>CRv4_Au5.s16.g6321.t1
MSRAVQLAALGLVGFGLPAWAVTLISDVRAQQLIVACAIVSFFGFLGTIYLVPKVAAKTQARGICGKDLNKKGTPAGDKPIPESAGLAPGCVFLLCVICFELLHYYDIGSLVGFVRSGFTGELKTESISEAWLVDYNAALATIGFMLFLGFSDDVLDIRWRVKLILPLFASLPLLVAYSGGTGIALPKPLAALGLPPYLELGILYKVYMVMLGIFCTNSINILAGVNGLEAGQTFIVACAVLLHNLLSVAGWPGWGAGGADAAAARDGHLFSAGLMLPLAATTFGLLVFNWYPSKVFVGDTFTYFAGMTIAVAGILGHFSETLLLFLLPQVFNFVYSLPQLFGIVHCPRHRLPVFDPATGLLRPKDAPDWNLVNLTLQLFGRCGENALCIRLLALQVAS…
>CRv4_Au5.s16.g6335.t1
MVRSAVALDGPGTATESNPDKQPAVQLIAQDGDLLSNLDDKVQAWQGSYLIPIKQLSASWHLETQMVFKGLVGGHERWDNKGGSNWTVAVEVAPGVGLVQALNPTYASTRELTSSLLLRLEALVAARLLTPEQGSVLRVLAWQHDMGLIKAYQEIRNNKDERQVAGVLAGRCSWLRPPGLNVVHIASEMAPVAKVGGLADVTASLAKAHQASGLLTEIILPKYDCIKYDDVKELKKMATLHVPWGPDPNRTIETYVWSGLVDGLPVYFIEPNCSERYFWRGKFYGEPDDGARFSFFSRAALEFLAQRQHEAPDIIHCHDWQAAAVGPLLKETYRASGLARTRAVLTIHNMAFQGHLNGAFLQHMGLTPRAAHVTSPDIMLDGNAPPPAPANNSGNPYGH…
>CRv4_Au5.s16.g6337.t1
MQQCVGRSVRAPSSRAVAPKVAGARVSRRVCRVYASAVATKTVKIGTRGSPLALAQAYMTRDLLKKSFPELSEEGALEIVIIKTTGDKILNQPLADIGGKGLFTKEIDDALLSGKIDIAVHSMKDVPTYLPEGTILPCNLPREDVRDVFISPVAKDLSELPAGAIVGSASLRRQAQILAKYPHLKVENFRGNVQTRLRKLNEGACSATLLALAGLKRLDMTEHITKTLSIDEMLPAVSQGAIGIACRTDDGASRNLLAALNHEETRIAVVCERAFLTALDGSCRTPIAGYAHKGADGMLHFSGLVATPDGKQIMRASRVVPFTEADAVKCGEEAGKELKANGPKELFMY
>CRv4_Au5.s16.g6338.t1
MPVAERLRLMREENEWKNNLVMWLFPDSVRDQIPHFWQTWLRCWILCAAVYFGVGGLWCYYTYFCFGDKWFAPGTIPAWKDVAEQMRVSNIAMPLYSMLPALTEMAAEKGWTRAYPRVENVGLPAYVLYFFLYMTSVEFGVYWMHRILHWGPLYKYLHWDHHKYNKEHTLSPFAGLAFHPLDGILQAVPYAWTLLYCPMHFLTHELLLFATGVWTTNIHDCLHGHVWPIMGAGYHTIHHTTYKHNYGHYFIFMDYLMGTLTTPEQYDADKAARATKAVKAQ
>CRv4_Au5.s16.g6345.t1
MQGRASPMVGAVLALALAAGTGAALCWWLLEPRKRQTGGTVRQGVLDLIGNTPLVRVASLSEETGCEIWVKAEMLNPGGSVKDRVALQIVSEALADGRLRPGGLITEGTAGSTGVSLAMVAAAYGCRCSITMPDDAAIEKANMIQAYGASVRRVRPVSIVHPEHPVNVARREAASTPGALFADQFENEANFRAHLKTGEEIWQQTQGRVHAFVSGAGTGGTVAGVSTALKARNPRVRVFLVDPPGSSLFNKVKRGVMYTSEEAEGKRLKNPFDTITEGIGINRLTANFNRALIDDAFRGTDREAVEMAAYLLRNEGLWVGSSAAMNCVGAVKAARAMGPGHTIVTLLCDGGHRHLSKFHSKEYLESMDLAPRETDRSLAFVS
>CRv4_Au5.s16.g6352.t1
MTEVLKRGFPGMKSVKDMPIVQDAPPPGGFPTIRIERRLPSTGPTGVAIFAGLAAIMGYGFYKLHEQRQEKRFEADEILTVRKIVHPVLQAEWDLRYLEHLKREREEEAKVMKNVPGWKVGESTTRHRWLAPLESWDKRPLV
>CRv4_Au5.s16.g6362.t1
MASQRSGFDGTPFGQILFQIDYVYISIFTVEALLKIIAMGLVMEKKTYLRDGWNVLDFLVVVSGFVNLAVPTNLTGIRTVRALRPLRTVLVTTMLSSLPMLMDVFVLCAFCFFMFGIIAVQLFAGVLRNRCGNPDFSGAYNVTQPDGLLLIANTSYVVPDQEADSTCSGPLSAETTWYYIDGAVTAVLGPSGNGGGRVCDTNMFCMMYRNPNYGMTSYDHILWSWLTIFQHIDAVSFWVWPFYLALVIFGSFFMINLALAVLSINFSTDNFKEEQHAKEAEQNERRWLSGDEGEAQSQSGPSIAVGPGALGSVTGALMLQPQGQSQGQPQASAESEEKLNAMLLLQARHKRHEADPDEEEMAPGAPPPPGLGPMRRAAWRMSVSRWLEILTAVVIILNT…
>CRv4_Au5.s16.g6375.t1
MKSFMRRDALGAGLRGAASTKPVSRVASVRPAPTAYRTACQVAKVDEMVSVDEELTRLRKENELLRAQLALYQQNQQPSVGAAAVAPPAAATKVLEKPAPAKQASVDGGIIWPKPGEAFWERSPRASPMPLQGGAAEAPPVERDGNPMHIIHITAEMAPIAKVGGLGDVVTGLAKAALARGHFVTVMLPFYECLPKDQIEGLKHECDIEVPKGYRWDGEIRVGPLKTSVFWGRVQGCPVYLIKPADDTNCNIFRGGRIYGGSYNEMEAYLYFCRACLEYLNVSQQNPHVLQLHDWHAAAASMLYWDVYNPNGFSRTRLMLTIHNLDNTGETRQDEFFFTGVPGENFATIDKALDERTIGHNPERLNLMKGGIVYCNAVTTVSPTYANEVLNGGAAGWLR…
>CRv4_Au5.s16.g6387.t1
MYVGASWDPYELIDRGVAAAAAMSGGARPRSTKQMPPSLDGFGWCTWDAFYSTVSARGLAEGLAALEAGGVSPQLLIIDDGWQMTDVDPPMRKTPAADLADKLHVEGEPRRLLEATQDEFFYESQEVMADAAAHMPQAAGTTLGTVMPTLANLGPQHNAPLHSHSGSVASLDTLDLTNNNTIASQSQDNTGTRPTGGQRQQQDRPAAPSSTAGMATRAQHAGASAVESSGVGVSITEAVRAREAAGASTTTQEPAVPPVAPAPAQLAVRPATAESELAAKNAATAFWLVRASQKVAGWFMGIATAGFLIFYQWVVEPAPPNSLAVRAFAAAAKGLLKPAMLSFYATASDFTRRLTSVRANGKFSHPDAGPDTDWAGVPEALGTVVAHIKRKFGVRYIYC…
>CRv4_Au5.s16.g6410.t1
MEVLKENVPRAHDMAMSAEKPPAKLARVDFEEKLLVKKLNDKATLPKRGSAGAAGYDLASAEDTVIPAKGKGIVKTGLSIRCPKGTYGRVAPRSGLAVKNFIDTGAGVVDEDYRGEVGVVLFNHSDVDFVVKVGDRVAQLVLERIATPDVEEVEELDATDRGANGYGSTGVAKA
>CRv4_Au5.s16.g6435.t1
MVCSSAFRGARAHGVPGHAAACDRHRRTNALLASAAGGSSGSSLSGSSSSSGSSSGISGISNGGAAQVDGAGGDGRGGHSGRSIGGSGNDSDGDHDGRKARRGEPKAGWSIKVDVSIGAGLAFGLPLLGAGLAFGLAFGLHLLGQGVRDGLKGFGGESFARPGDSGGSVLQSAAADVGSKATKALFPNEGGAASVVDKAVDTTTAIADKAVDTAAVVAGKIDAAAAAANKGVDTAAGVANKWLLLSLFTWTADRVPQGTKVLIGEVEKIGPEEALSQEKLCPILAMYKAPDYDAGVKMACDLIMYGGAGHTSVLYTNPLNHAHIQQYQNAVKTGAIGDLYNFHLDPSLTLGCGTWGSTSVSTNVGPQHLLNVKTVTARRENMLWFRVLPKIYFKGGCLE…
>CRv4_Au5.s16.g6436.t1
MWLMYECPDTRFDGLAMRFMDIRKRVYEVPELGKKATMVCIPTTSGTGSEVTPFSVVTDERLSAKYPLADYALTPSMAIVDPQLVLNMPKKLTAWGGIDALTHALESYVSICATDYTKGLSREAISLLFKYLPRAYADGSNDYVAREKVHYAATIGMAFANAFLGICHSMAHKLGAAYHVPHGLANAALISHVIRYNATDMPAKQAAFPQYQYPTAKQDYADLANMLGLGGNTTDEKVIKLIEAVEDLKKKVDIPPTIKEIFNDPKTDADFLSHVDALAEDAFDDQCTGANPRYPLIADLKQIYLDAHAAPILPIKSLVFFSKIH
>CRv4_Au5.s16.g6444.t1
MASAGAKQSAEVPIAELRTLCTKALKTLSYTADEIEILNDVLFYAQLRDNNQGIVKITSGGLNKSPAARPPVVEKETRLSALINGNNSAGMLVLHKATQMAIERARGQGFGIVGTNHTPSSTGALGYYVDLISRQGLIGIVLAQSPEFVAPHGAKQPIFGTNPIGISIPAQEGAVTMDMATAAYAWFGLLEAKAAGRPIPGDVAMNAEGQATTDPNEVLQGGAIRVFDKSYKGSNLALMVELLAGPLVGAAVADKLEEKNWGNLVVAIDPGLLGEPDEIKRRVQVVLDRVRGAEKLPGVEEILMPGERGNRKANARIAAGVMPLEVNLLSQLRAMAAKYDSQGSPPASPAKLSVATRLVHPKTKVNDPYGASMPPLWQTATFAQPSATTFGEYDYTRSG…
>CRv4_Au5.s16.g6452.t1
MIVLSPVVVNILAVILGAVGVMVLRVVTVMFSKRPAPKRSNPAKTMIVLGSGGHTAEMLMLMDSMGREHYGPRTYVVAATDAMSGAKALARERTWQKTDSPTGFNVVQIPRSREVGQSYLTSVATTLYSLAFAFRIVLRERPELVLVNGPGTCIPICAAALTYRVLGLAPTQIVYVESIARTRRFSLSAKLLYHLRMADLLFVQWEQLAKTYPRAVYAGRLY
>CRv4_Au5.s16.g6473.t1
MACQLRTRMAKVTSVQHGPLAAPRVRGVAVRADTPQNLTPAAPTQPAQRQAPAAVAIAAAAAILLGASAPVLAAEAPELFANKCAGCHMNGGNILAVGATLFSEDLQKNGVDSPEALYKIIYSGKGKMPGFGKECAPKGACTFGARLSDEEVTSLASYVAERAAAGWKS
>CRv4_Au5.s16.g6479.t1
MAQLEAPPPEAAPPESGGKDLSLSEVLLIELSILIVSFVAGRALERIRFKWMGEAGAALLLGLVVGLIMKAGGVEHTVAHAVEFRGDIFFYVLLPTIMFDAGYGLDAKVFLRNVGSVCSYAFLGTTISTFVVGLIMWGFGRQGWCYQMTLLENLTFGALISATDPVTVLAVFQRLGAQPDLYINVFGESVLNDAVGLVLFQVITKFLEGKAVTGPNVMAGIGLFIGIFAASVAIGLAVGFLASLIFRSRFFYSGAVHDPVTGKELAPAGNSVFEVGVAVTFAYGAYLVADVAHCSGIVAVVTNGMVMNLYVRPNLSHEAEVKIEYLFKVLAALFELFVFCYIGTTLFLGPQHYNVWSYAVGAVADARLAGSVDAGSVGAGADVDSVDEGSVGEGSVDVG…
>CRv4_Au5.s16.g6481.t1
MGALAVFAVACLAAVASVAHAADTKKPNFVVIFTDDQDAIQNSTHPHYMPSLHKYIRYPGVELSQYFVTTPVCCPSRTNLWRGQFAHNTNFTSVLPPYGGWAKWKGLGIDQSYLPLWLKDQGYNTYYVGKFLVDYSVSNYQQVPAGWDDIDALVTPYTFDYNTPGFSRNGATPNIYPGEYSTDVIRDKGIAQIKSAVAAGKPFYAQISPIAPHTSTQISTDPVTGVTRSFFYPPIPAPRHWQLFSDANLPGGTPNKNLYEVDVSDKPAWVRALPLAQQNNRTYLEEIYRLRLRSLAAVDELIEQVVKTLDEAGVLDNTYIIYSADNGYHVGAHRFGAGKTTGYEEDLRVPFLIRGPGIKASQSDKPQNSKVGLHVDFAPTILSLAGASHLLGDKGLDGT…
>CRv4_Au5.s16.g6482.t1
MGALAVLAVACLAAVASVAHAADTKKPNFVVIFTDDQDAIQNSTHPHYMPSLHKYIRYPGVELSQYFVTTPVCCPSRTNLWRGQFAHNTNFTSVLPPYGGWAKWKGLGIDQSYLPLWLKDQGYNTYYVGKFLVDYSVSNYQQVPAGWDDIDALVTPYTFDYNTPGFSRNGATPNIYPGEYSTDVIRDKGVAQIKSAVAAGKPFYAQISPIAPHTSTQISTNPATGVTRSYFFPPIPAPRHWQLFSDANLPGGTPNKNLYEVDVSDKPAWIRALPLAQQNNRTYLEEIYRLRLRSLAAVDELIEQVVKTLDEAGVLDNTYIIYSADNGYHVGAHRFGAGKTTGYEEDLRVPFLIRGPGIKASKSDKPQNSKVGLHVDFAPTILSLAGASHLLGDKGLDGT…
>CRv4_Au5.s16.g6506.t1
MLATCIIQPIDMVKVRIQLGAKGSPLAVGAEIVRKDGVGALYKGLSAGLLRQATYTTTRLGIFNMMSEELKARNNGQNLPLWQKAVAGLSAGGIGALVGSPADLTLIRMQADATLPVEQRRNYKGVADAFIRIVKEDGVGGLFRGAAPTVVRAMSLNMGMLASNDQAKEAIEAAGFPKGGTVSVLGGATIAGFIASAFSLPFDFIKTRLQKMTPNPDGTMPYKGPIDCALQTLKNEGPLKFYTGFPTYCIRIAPHVVFTLVFMDALPKVQKNFGL
>CRv4_Au5.s16.g6509.t1
MRALILVGGYGTRLRPLTLSCPKPLVEFANKPMIIHQIEALKVAGCTEVVLAINYQPEVMLGFIQEWQEKLGVRIVCSQEKEPMGTAGPLALARETLDDGKGTPFFVLNSDVICDYPLKDMLDFHKARGAEATILVTKVDDPTKYGVVVMDEYGQVQRFVEKPKEFVGDKINAGIYVCSPSILNRIELRPTSIEREVFPHVAADNRLYAYTLNGYWMDVGQPKDYLKGLHLYLDSMAIRQSPQLAKGTGINGNVLVDPSAKIGEGCLIGPDVSISAGCVIGNGVRLSHCVVMRGVRIKDHSKVESCIVGWDSKVGAWSRLENHCVLGEDVTVKDELYLNGAIVLPHKEIKESVSTPAIIL
>CRv4_Au5.s16.g6512.t1
MSGWPPDALHPPLPGPSGSAHADEANTIQLSPVAVALAGAVLLINGAISLRFKLGLHSQLLIASVRMVVQLSILGYMLVPIFNYDRWWLVLLYGCFMLMIASLEAVQRPGYSFKGMLGHTVLAMASSSGCLLGYLVLVVLAVRPVWEAQYVIPLLGMWVSMTPLLNQMSVMGVVSIPGMMTGQILAGGDPAQAARYQMVIMFVIGGATCLASVTSVYLAVLHVVDATHTFRAERLIRKQKPAAAAGGGGGGGALAALGGMAAEAAAAARAGWATAQRKGAALGSCLAAACCCCLCPPASASAAPARWRRAPAQGRRQGRGKGGVGGSGGLESVGEGDEEDEERWAGDTLPVSSGAHGGAALPSSPASPFAPLSGRRAWARGATQTPGNASNSSYGAGPG…
>CRv4_Au5.s16.g6522.t1
MVVRGAPAIGCTGALAMAVELHALKGAGAAFGSAQEALEFINQTLDFLVTSRPTAVNLADACNRLKAVAATAAAADGASAVGVCGAVIEAAEAYLAEDIASNKAMGAFGSAALLAAVKAAGRGTAGGRVRVLTHCNTGSLATAGYGTALGVIRALSEQGKLEHAFCTETRPYNQGARLTAFELAHDQLPATLICDSAAAALMAAGQVDAVVVGADRVVANGDTANKIGTNALAIACGHFGIPFFIAAPTTTIDPDLPSGDHIVIEQRCHTEVTHHKGERVAAHGVGVWNPSFDVAPGSLIEGIITEKGMVPKKDGAYQIRSFMHNLGLWKPPTGQSLDAAEQATLAAPHGFRALDCDSVRHYVAARPPLQQRVGPPASVDSWTVREVGDGNINFVFIVE…
>CRv4_Au5.s16.g6524.t1
MQIQALFKKTGASAPAKKGTASTKVVKPSKAGGKATRGWLGGQGGAADLDKWYGPDRKLFLPSGLYDRSEIPEYLNGELAGDYGYDPLGLGKDPETVAKYRENELLHARWAMLAAAGILIPEGLQANGANIKGGTWFETGAEMLNGGTLNYFAVPWGIVSNPLPLFAVIAVEVGLMGAVEFYRRNGTGPAGYSPGIGKFDSSVFDGLDPLYPGGPFDPLGLADDPEVLQELKVKEIKNGRLAMVSVLGFAVQSYVTGEGPYANWTKHVADPFGYNLLTVLGAEERTPTL
>CRv4_Au5.s16.g6527.t1
MDAVTTYLGLGSYASWDEPKRLAFLLGELQGKRPLMPPGMDMSPEVKEVVRTLRILSELPGDSLGAYIISMAKTASDVLAVVLLQRETGVRPALRVVPLFETLDDLHNAPGTMTTLLGNDWYRGHINGVQECMIGYSDSGKDAGRLAAAWALYETQEKLVEVAAGCGVRLVLFHGRGGTVGRGGGPTHMAIRSQPSGTINGHLRVTVQGEIIEQQFGEKEVCFRTLDLYTSAVLEAALDPPPAPAQEWRDLMSLLATESCDMYRSVVYRTPEFYDYFMQSTAASELGRLNIGSRPSSRKSGGIETLRAIPWIFAWTQQRLHLPVWLGIGEALEAAIDKGYGPVLQDMYANWPFFTSTLDLVEMVLAKADSRLSAFYERTLVDSSLAPLGQRLRELLAKT…
>CRv4_Au5.s16.g6551.t1
MLQARPLHAARAGARGASKRSICTRAVSAPAKPTPKLTGEARSHETDVVVIGSGIGGLCCAGLLAKYGYKVTVCESHYIAGGAAHAWERDGYHFESGPSLYSGMAGRGKEANPLGHVLQALGVELDLIRYNTWNVVVPEGTFLTRIGNDNFVEVLKQIRGPEAMAEWARLQEVMRPLAKAATMIPPAAFRYDPGALVTAIGRYLPSLLESGPNAAKLSGPFAGVLDGANIRDPFIRNWLDLLSFLLSGLPANGTVAAEVAFMFNEWYRPDCFLEFPVGGSQAMVQGLVGGMEKYGGRLMLSSHVDKILLDDKGKASGVALRGGGTIKARKAVISNASVWDTLKLVPADRLPEQWRRERADTPACPSFMHLHVGFDAKGLDPGLELHHIVVNRWEGGVDQ…
>CRv4_Au5.s16.g6565.t1
MLRGQRSSPVLRAGHRFFASAAAPSPVAAAAAPPKVKLLIDGQFVDSTTENWLDVVNPANQDVLGKLPLTTKSEFNAAVKAASDAFPKWRATPVPTRVRVMFKFQELIRANMEELARSVTMEQGKTLADARGDVFRGLEVVETACGIAPYMTGEMVENVAGGIDCYSIRQPLGVVAGICPFNFPAMVPLWMFPLAITAGNTFVLKPSERDPGAAVMLADLAQQAGLPKGVLNIVQGSRDVVNWICDDPAIRAISFVGSDSAGKYIYARGCAAGKRVQANLGAKNHAVVMPDADVDSTVKALAGAAFGAAGQRCMAISAAVFVGGFTDKWREPLLEAARGLKLNAGWEKDADVGPMISPEAKARAERLIASGAAAGAQVLLDGRGVSVPGYERGNFLGPT…
>CRv4_Au5.s16.g6569.t1
MSSFSTLQSLGPVRSGHQIDTQKLESYLRQQLPELFRGANASSGLGVQQFSHGQSNPTFLVTIGQTKLVLRKKPPGKLLASAHAVEREHAVLAALSPSGFPVPRAVHLCAGNEPLGTPFYLMECAEGRVFLDPNLPELAPGQRSAVYRHMAQVLARLHSLDPSGLGLAPGYGNPDHYCARQLRRWSEQYRASVPQPMPEVLRLMDWLGAHVPPGDARPTRPAVVHGDYRLDNIVFRPDPSGSFTPLAVLDWELSTLGNPWADVAYNCLPYHLPPHITVLQRLRRGAAGAGGAGGAGGAGGGGGDTGPLPAGVPNEQEYLGWYCAAAGVAPPPAGDWAFYLALSLFRLLAILAGVQARAKQGNASSANAARVASDEVLRALAESALAIIHRADGSNSGSS…
>CRv4_Au5.s16.g6603.t1
MQQKGCVVWFTGLSGSGKSTVACTLEHALAESGKVTALLDGDNIRHGLNSNLGFSATDREENIRRIGEVSKLFADTGIVTLVSFISPYRRDRDRVRSRVPEGRFIEVFMKVPISICEERDPKGLYKKARAGQLKGFTGIDDPYEEPLNAEVVLEAETADGKRISPQDQARTLLEYLHSKGFLTGPSTPPK
>CRv4_Au5.s16.g6617.t1
MSSASSRMFNYGIGLHLVKGNPAPRDSKIEPKTCHISFQVSISLEEMEAHLKEWGLDYVKQVFVEDGVEVCNCHELPVVPLAEGLLACANVAAINSAAAVAAATAVELAATPGDAVSCLAAALTEMPALMAAPPAAAAAAGAAITKEMHEHVAASSSGIVRHVATAPSTADTPDPAASPKMPLTPPSCDATTAVAAAVPTAIITTQAQATAAALPPPHLNSTPASHLLADEAGSTCSCSLDSELQEPCGAADDASSSAACGSVAGGGPRRSHSFGSSSMFSGFSGSLASVSMPSGLLVASVREAAAAGRSRSVRVSELDEWLSLLGTVASEPVPAGVKDAGASAYAYLASPAGASELVATPPGLSGLSCMELGTGGGTAAVAAAAVAERKQCGEQASQL…
>CRv4_Au5.s16.g6629.t1
MQRVAAAVPLSRRTLLALASMAVAVAAQQLGPASTARAEEASAVAASTSGAEQAAAPGPLTQYNNTAQKYQLLVPASWESKGKAGADALFEDPARRSTSVGVTVNPVKVASIDKFGSLAEVGDKLLEAEKKKESTLAVSLVSSSERQGGAGAKLYEYEYELDSTRGRKRILNTVTIFNSRLYILNAAYKCEKEACGEESLAGVQLLRRVAATFDVQP
>CRv4_Au5.s16.g6630.t1
MEAADGCPGKYTVGLGQEAMAFCSDREDAVSQALTAAAALMDKYGVGPWEIGHLQGADVVHACFGGTAALLAAAAWVESSRWDGRLAMVVCADVALYAPGSAARATGGCGAAAMLVGPDAPLVLDPLWYGTHGQHAYDFYKPLGSLPYPTVDGALTLSQYLGSVGHCAVQLAQRLQAAGELQPGEGLLPHVCAFVGHAPLNKLLRKGLGRLALMDELRRREAVAAAAAAAAVAGTAAAVAGQAVGAAAGAAKDTRLLTPAGPQRQEAAEAEVKAEEGGESREGAALEGGAAGEWAQEWVQEQHQGHPSHSHALAPHLVPRLELDLGGLDEFLPRPSAGTTTVPMAAGSGGGCSVGPAAAAAAAAAAAAEWRLSDKSLEGALVEGTAALWQELGEDAAWL…
>CRv4_Au5.s16.g6652.t1
MLARAACLLARSAEQAQLPQIMVRTFAAAAAAKTAPKAEMKLPVAPLQLSGTSGAIATLAWQVAAKENVLAKVQDELYQLVEVFKSHPEIRRLATDPFLPDAFRRKVVRDMFATKDVTEVTKRLVEALAEENSLSAIVQVTLAYEELMLAHKKEVHCTVVTAQPLDDAERAVFTKQAQAFVDPGFKLVMKEKVDRKLLGGFVLEFEDRLVDMSQAKKLEEFNNLVTKLENDLK
>CRv4_Au5.s16.g6690.t1
MRDRSHGGVNEEEAVEAAERELRRTQSPQFRQNRHPFLIGVAGGTASGKTTVCDRIMQRLHDQCVVMLSQDSFYRTLTPTEMALAKENNYNFDHPDALDRKGMMECLQKLKEGRSVEVPVYDFALHARVEETRRMDPADVVIVEGILVLAMEEVRDQLNMKIYVDTDDDVRLARRIQRDVASRGRDVASVIEQYTKFVKPAFDTFIGPSRRHADIIVPWQSSENVVAIDLITEHIRLKLRQHDLIRIYSNLEVMPSNFQMRGMHTILRDRDTSPNDFVFYADRINRLLVEAGLGHLPFREKTVMTPTGHKYTGVEFARGLCGVSVIRSGEAMEAALRECCQGIKIGKILVHRHGKSEDIVYEKLPADISRRYVLLLDPVLGTGNTACKAIQVLLDKGVQ…
>CRv4_Au5.s16.g6694.t1
MAHIRHIFLTGVPGCGKSTLCRKVVESGLEAQWQGFFTGEVREHGERIGFDVITIGEGAALKGPLARVPREQVPRSGPSVGKYSVDVSSFERLALPALQLSSGSLTTTRLVLVDEVGKMELCSRAFFPAVRAVLDAPNVVVLGTIPTPRDGRVIAQVAEICARPDVEFSTMADPAKLAPGTVDDIPAASLHYVAGRARRGVACSAWPLQRRRSPFLCRAGASGASAAVPGVGRSIQQGRPPAATCSSLSSVLRARCQQNGAWALVGGGTAQGASATSCSSAACVMRADAVLQFTVPHGGASPCG
>CRv4_Au5.s16.g6730.t1
MCIFRPDHTAEGYQLAIDLGADFIECDVVLTKDLVPVCRHEPLVSGTTDADAKFPSLIKSIIIDGVNYTGVFTTDLTLAEVKTLRCRQPLADRDQSFNGLFAIPTLEEYIAIAKGANRTVGIYPETKHPTWHDSLPIVKAAQTTMSDIVLNVLKKHGYKGPVNSKAWSRQPAFIQSFEVGNLKYLSRKTCIPLVQLLSDWNTPIPDMPYMNYSAIMSEEGVKEMATYASGVGPSKGTLVRAKVGANVTANGAGLESSGLAERIRKNGMQAHPYTFRNEARYLSYGSFASAMDEFEFFFVKLGLEGAFTDYTGSLRQYFTMKAQEQGRLWNTGAVINRAGRPKPHNPKC
>CRv4_Au5.s16.g6731.t1
MRFAAAIVLAIVLAFCSQVEAGVWPRSRPYVVGHRGACGYRPDHTMASYQLAVDMGADFIECDVVLTKDLVPVCRHEPLLSDTTDADAKFPSLIKTNTIDGYNYTGVFANDLTLAELKTLRARQPLPERDQSFNGLYPVPTLEEYIALAKAAPRTVGIYPETKHPTWHDSLPIVKAAQTTMSDIVLDVLEKHGYKGPVNSKAWSRQPAFIQSFEVGNLKYLSRKTCIPLVQLMDDFTAAIPDMPTKTYSDLMTDAAMKDIATYASGVGPWKNTLVRAKAGANVTANGAGLESTGLVERIHKYGMQLHPYTFRDEAYRLTYGSFSTPWDEYELFFDKMGIDGAFTDSADTLKTFFNEKAKEQGRLWNTGAVINRAGRPKPHNPKC
>CRv4_Au5.s16.g6744.t1
MATKIALLGTGLMGAKVCKRLMSLGSWSVRCWNRTAEKSERLAEFGAEPCATPAEAVQGTQVIVLFLADAAAIRSVLMEDPSVRPQLKDKVVLQMGTIGPKESAALALDILAAGGSYVEAPVLGSQPEAEKGTLLVMVGAEADPREPGSPHHSTVWPLLRALGQESNIHFIGPVGTGAAVKLALNQLIASLTVGFSTSLGLVQRSGADVDKFMSILRASALYAPTYDKKLQKMLDRDYGAANFPTKHLLKDVRLFETEAAAAGLDTRLLAALKGVVQDTVDRGLANTDYSAVFDAVAHPGEQQQATKPQQ
>CRv4_Au5.s16.g6764.t1
MNIATDVTELIGKTPMVYLNKVATGTHAKIAAKLEIMEPCCSVKDRIGYSMISSAEKEGLITPGKTVLVEPTSGNTGIGLAFIAAARGYKLILTMPASMSLERRILLRAFGAELVLTDPAKGMKGAVAKAEEILASTPDAFMLQQFQNPNNPKVHYETTGPEIWSATDGKVDILVSGVGTGGTITGTGRYLREKKSDVQLVAVEPAESPVLSGGKPGPHKIQGIGAGFVPAVLDTALISEVVQVSSDDAIDMARRLALEEGLMVGISSGAAVQAAIKVASRPENEGKLVVVVLPSFGERYLSSVLFQQLRDEASKMTFEPSA
>CRv4_Au5.s16.g6764.t2
MQLQQKALRLQSTFPTRVSRVALVPKAVAAPEKAAVKMNIATDVTELIGKTPMVYLNKVATGTHAKIAAKLEIMEPCCSVKDRIGYSMISSAEKEGLITPGKTVLVEPTSGNTGIGLAFIAAARGYKLILTMPASMSLERRILLRAFGAELVLTDPAKGMKGAVAKAEEILASTPDAFMLQQFQNPNNPKVHYETTGPEIWSATDGKVDILVSGVGTGGTITGTGRYLREKKSDVQLVAVEPAESPVLSGGKPGPHKIQGIGAGFVPAVLDTALISEVVQVSSDDAIDMARRLALEEGLMVGISSGAAVQAAIKVASRPENEGKLVVVVLPSFGERYLSSVLFQQLRDEASKMTFEPSA
>CRv4_Au5.s16.g6776.t1
MPPEGRPDLCCVENNGVLTRVGTFPIGIDPERFTRALESEEVNSQTAKLLNRYAGRKIMLGVDRLDMVKGIPQKLLAYEKFLEEHPEWRDKVLLVQIAVPSRTDVPEYQKLRSMVHEIVGRINGQYGTLTYVPIYHLDTSLSFTELCALYAVTDVALVTSLRDGMNLTHTAQHWADTFITELNDTHIEADLRMRHTPPPLDVQEVVRAYQSSRRRLVVLGYNATLTTSVEAPRLPKRQFEQVKALAKVNPRVMQSVCELCTDPNNVVVIFSGSETSKLDEVFGHLPVWLAAENGVYVRPPAAPLPGGPGGGAGGAGGGGGGGGGTPKAPALPRGQSLPGGAPAHQQQQEPRPPLPQWKCVFDQVHCEWMESVQLVFDYFCERTPRSFVEARETSLVWNY…
>CRv4_Au5.s16.g6782.t1
MGGLNSSTSPDTARSFSSHCLSSSGGGVVGPRGSLLHFDPSCTVELREYFDGAYFAEVRRVADAATAYFRALVARQNRQDQLAGAAAPRASRGTVVFDIDETALSNLDTFFSRAAPWSRLLGMGPAADDCVHPHLEYMPFAGAPASPPLVLMAGKGAAGEGAPGAAAGEGGAAAGGPRLCASPPLKAMLDLYEFLAASNFTLVFLTGRSEDARAQTAANLAEAGYGNLCSAPSGTAAAAAAGALSLSAAFDAATAPSRSSGADGSAGGPLRRRQLAQQQEATATAASGTGSSTSGLAAPCYEALLMRQVGDERLASVFKAEARAALTAGGAGGGHVIVGNIGDQYSDLVGEAAGAASFKLPNPVYTLL
>CRv4_Au5.s16.g6787.t1
MTDPKGQDLDAEKQHAATLHNAEDTLCSAVQDETAEDLRPRNVIVRFFQFLASFMIPGLGMFCEAYFVFAVGNLSALWKVEYKNCWKGIGCPVKLSESITYTQVCGIIFGQLFLGFFADRIGRKWGSVATAGTMVVGAILIISSAGPTENALWAMFTAVQFIFGIGVGGEYPVASASANERAESSAALQKRRGETVVLVFSMQGWGNVVNTAVIIAIMAGFGQYGAPYSNHALEVTWRLSYAIGLIPLISILLYRIFRLRESAVWTKKREALQAMGGSEAKGVQWRKFGLLMYYYWHRNFGTAMSWFVWDFAFYGNKLFQGTFIKIINPSASLIQVLEWTLLNSSVALVGYYFAAFTVDKPWMGRMRMQVMGFAWMFVLFLICAVHYDQLRTPKYIHTF…
>CRv4_Au5.s16.g6789.t1
MADVKALDAEKAHEKTLQHAEDSLCSAIKDVDEDVRPRNPIVRFFQFLGSFMIPGMGMFCEAYFVFAVGNLSALWKVEYKNCWKGIGCPIKLSDSITYTQVCGIIFGQLFLGFFADRIGRKWGSVTTAATMVVGAILIISSAGPTERALWAMFTAVQFIFGIGVGGEYPVASTSANERAESSAALQKRRGETVVLVFSMQGWGNVVNTAVIIAIMAGYHQYGAPYSNHALEVTWRLSYAIGLIPLIGILLYRIIRLRESAVWTKKREALQAMGGSEAKGVQWRKFGLLLYYYWHRNFGTAMSWFVWDFAFYGNKLFQGTFIKIINPSASLIQVLEWTLLNSTVALVGYYFAAFTVDKPWMGRMRMQVMGFAWMFVLFLICAVHYDQLRTPKYIHTFQFL…
>CRv4_Au5.s16.g6799.t1
MSSNTDVAAERVAVLARQLCAGSASALSLSVDSKQMREFMTHDNRQLRDAIFEFLKDDLYKPNLYQGMMEFREQTLQRLKKFVGQRFFSVRDYNSDPRRFIAALECLMYADYSLAIKAGVHFTLCGGTIAKLGTAYHHNKYLPGVDDLSLPGCFGMTELGHGSNVMGIETTAVYDAASKEFVINTPNDEASKYWIGGSGQHGKICTVFAQLTVNGQWQGPHVFVVRLRDDGGRLMPGVRIQDQGPKMGLNGVDNGRIWFDNVRVPREDMLDAFASVSADGVYSSSIPSVSARFGTVVGGLTTGRVLIASGGIDGAKLALTIAVRYSCARTQFGDRYIMEYVTQQARLLPPLAQTYAYHFALGHLKSLVAAKKASDAKTIHVLSSGLKAAATWGRVEAMQ…
>CRv4_Au5.s16.g6811.t1
MALSMIAQRRAGAFSARQAPRAVRAQAAVRPVWFPGNPPPAHLDGSLAGDYGFDPLFLGQEPQTLKWYVQAELVHGRFAMLGAAGIILTSIGAKVGLGFPEWYDAGKVVVEKNNIDFPTLMVIQFYLMGWAETKRWYDFKNPGSQADGSFLGFTEEFKGLENGYPGGRFFDPMGLSRGDAAKYQEYKQKEVKNGRLAMIACLGFAAQYAATGKGPLDNLADHLADPNHVNFATNGVSIPIA
>CRv4_Au5.s16.g6812.t1
MIPALFTVGLRWSAHSLVRSSATQARQASTLLYVEHSGDGTVAPATLSAAEAAKHLPGQLEALVCGSGDAVKRAAEAAARLPGVSKVWLASDSALTHPLAETHAKLLSSLATKQKPSHVLAASTAQGRNVLPRAAALLATQPVTDVVRIVDDNTFVRPIYAGNAFATVQFKSPPAVRVVTVRPTAFPVDPTAAAAAGAPGGSGSPAPVEPVPPELLAPLSSVPAAKWESADVRSTGRPELGSAKVVVCGGRALKSAENFAMLEQLADLLGGAVGASRAAVDAGYVANDLQVGQTGKVVAPDLYIGVGISGAIQHLAGMKDSRTIVAINNDGEAPIFSVADYGLEADLFKAVPELIEAVKKVKQ
>CRv4_Au5.s16.g6833.t1
MAAPPRNVDARTAALQRPASEVILKTHTEPSYDLAMERRKATFNVEELSYVLNGGKEQLEKKMRFAEMLSKTSWGDKSRRYFLNREEEYVGALKAALGIWEKMKSERLSLSDGALMRTLVDFPGGLELHIGMFIPSILSQGSAEQQAKWMPLCMGLKIIGTYAQTELGHGTFVRGLETTATYDKQTQEFVVHSPTLTATKWWPGGLGKTSTHAIVMARLMLPDGAGGVRDHGPHGFVVQIRDMDTHLPLPGVSIGDIGPKFGFGGVDNGFMSFDHLRIPRDAMLMRFSKVTPEGVYVPPPPSNSKASYATMVFVRADIVKNSGSVLARAVTIATRYAAVRRQTAPGPGQRELQVLDYQNCAATLLPLLAAAYALTFMGEDMMGMYRKFEADRDAGRFEG…
>CRv4_Au5.s16.g6846.t1
MASATVGGAPRSSVNLLVVSGPDSPELSVLQRLPAGVQVVATGQTPEDFAHLSAEQCASVDVLLNCGVGKNAGKRDDIRALWPRLTNLNWMHSASAGLEHLLFPELVEGPVTLTNAKGVYSHSLAEYCLTACNWFAKDLPRLRRQQAAGKWEPYDVEELRGKTLGVIGYGDIGQACARLAKAFRMRVVALRRRTELSAEEQAAGIVERMYSPDQLQELMAASDYVVMATPHTPATDKMVGAAAIAAMRPHSVFINLGRGKCVDEKALIAALQEGRIRGAALDVFETEPLPADSPLWGLDNVLMSPHCADRTKEFQFESLDFFIENMGRFLAGQPLANVCDKRNGY
>CRv4_Au5.s16.g6853.t1
MVEGSSAGGSAERSSRLFAKYASIISAGPAASEGVECGASGATGSASTSSSAAPTRPQPTPSSCSYAAAASAPPPGPLPPTSGSCPVAAPSPVSTPSTGSSSSTRTSCSAAAAVADGGTLNPLNNMPNSLAATPAPVPGLRGERVVSSIPMAPPDKLPPHQAPGQQNWVYPSEQMFYNAMKRKGWDPQAEDMRSVVGIHNTVNEQAWHQVLAWERLHCDECATPRLKRFQGRPSDLSPKARLLNFVGFGLPFDRHDWVVDRCGKEVRYIIDFYNGAPQPGQSAAAAFFLDVRPALDSVEAAWDRLRMQFSWVASGRWRE
>CRv4_Au5.s16.g6887.t1
MPPRTPIPVVKMDPKKAPWEQEKKPHNRWHPDIPPVAEVKTGDLFRVETIDWTGGQIKDDDSADDIKHVDLSCCHYLSGPIRITDEKGEPARPGDLLVVELCNLGPLPGDEWGYTGTFDRDNGGGFLTDHFPEATKAIWYFDGIYASSRHIPGVRFAGLIHPGLIGTAPSHELLKIWNEREGALVEAGENSTTLGGVLHTRPLALLPEPKGALLGDIPADSPQWSKVAGEAARTIPGRENGGNCDIKNLSRGCKVYFPVFVEGANLSMGDMHFSQGDGEVSFCGAIEMSGFLEIKTEIIRGGMEQYLTPMGPTKLHVHPIFEIGPLEPRYSEWLVFEGISVDESGKQHYLDATVAYKRAVLNCIDYLSKFGYTKQQVYLLLSCCPCEGRISGIVDVPNA…
>CRv4_Au5.s16.g6947.t1
MQSLQRVAHGRGLVARPTTRTVAPRTVTVQRAVSTDAESFVIPAAPDLIPDGAWAKVEGGVCAAKGFKATGVYAGLRASGRKGDLALVVADAPATVAGTFTQNVMCAAPVLYCKDVLSRRKTVRAVMTNAGQANAATGTQGYEDSVACAQALAAALGVEADDVLLQSTGVIGRRMKMESFLPAIPQLPASLGASTADAHRAAVAITTTDLVSKEAALRVTLSSGAVVTVGGMCKGSGMIHPNMATMLGVVTCDAAVSSDVWTGIVKRASVASFNSITVDGDTSTNDCVIGLASGAAGNPPITDPASQDAQLLDAAVTALMQGLAKSIAWDGEGATCLLEIEVTGAASDADARVIARSVAGSSLAKSAFFGHDPNWGRIAAAAGYSGIIFDQADLGVRLG…
>CRv4_Au5.s16.g6952.t1
MAPQPEAQYRVDPDGVAVITLNYPPLNALHPLLLRSLFEALRRAHADPAVKAVVLTGANNNFCAGFDISQFQNPDAGSGGGIDNSINDAICKYLEGGAKPVVAAVQGVALGGGLEVAMGCNARVAVRGTKLGLPELTLGIIPGFGGTQRLPRLVGLAKGCEMMLTSAPIKAEAGLKLGLVDVLAPDAAGLMPAARALALDIAAGRRPRMYSLTRTDKLPPLGEALALLDMARAEAGRRARGLAHPQLCLDAVQAGVERGGQEGLAAEGRAFAAAAALDTHKALVHIFFAQRATKKVKGVTDVPGLKPRPIRCVAVLGGGLMGSGIATALALAGVEVILKEVSQQFLDGGMARIKANVASRVKKGAMSQAAADAALGRVSGALDYAGFARADMVIEAVIE…
>CRv4_Au5.s16.g6953.t1
MASEPIAAAQGRLGVLAQHLAPPEAGDLLVQQLTAGGGSHSRGGYDPTFPQATTSAAFPPAVFDLLALDGLLSPEERALRDRVRAYMETHVAPVIADYWEKAEFPHPLVPSFAALGLAGGPIKGYGCPGLSILANGMAVVEVGRVDASCSTFLLVHSHLAMLTIALLGSEEQKQELLPRMAKFELVGCWALTEPSNGSDASALTSTATKVPGGWMLNGYKRWIGNGTWADVCIMWARNNQDGQVNAFIVRKGNPGLRTSKIQNKIALRCVQNADMEFSQCFVPDSARLPGVSNFNDTNKVLAISRIMVAWQPVGFCAGVYDMAVRYCSERKQFGSALGGFQLVQERLARMGGTIQAMWLACWRLSKLYEEGRMTHEQASLVKAWTSARGREVVALGREL…
>CRv4_Au5.s17.g7006.t1
MPRVHSRSLWNRLAVQKLVGTLTNQASRFWALSGKFMPMVGLFFMLAFVNTILDSLKDTLVITAAGGGAQVIPYLTVYAVLPSSLVFLLAYSYASQRFRRQTLFNGIVAVFMTFFAGFALWLYPNHHLLHPTSWAEGAAASLPLGLDGLVGMVRNWTFTLFFCMSELWGDVCLGLLFWGLANDTTSLADAPTLYPLFGLGANVAQALAGFVLKFFSGPASHGGSFTWEVQSLMAVVMVFSVAALALHHAISAQHNAHRAERRAARNAERAAQQQALSQAAAAAAARGDAPAAAAPALQLASASVDLPAAAQPQLPKDAASTRPKKSKQSMGEIYRTLASSVPIRCLVVMSMAQGLCTNLMEFAWKSHIRLLYPTPAEFTSFLGDVSTWQGIVTGLLMVL…
>CRv4_Au5.s17.g7007.t1
MLSSVRLAALRAGKTNSVFQAVRAFAAEPAAAATTDAGFVSQVIGPVVDVRFDGELPSILSALEVQGHNVRLVLEVAQHMGDNTVRCVAMDSTDGLVRGQKVVNTGSPIKVPVGRGTLGRIMNVIGEPVDEQGPIECSEVWSIHREAPEFTEQSTEQEILVTGIKVVDLLAPYQRGGKIGLFGGAGVGKTVLIMELINNVAKAHGGFSVFAGVGERTREGNDLYREMIESGVIKLGDKRGESKCTLVYGQMNEPPGARARVALTGLTVAEYFRDVEGQDVLLFVDNIFRFTQANSEVSALLGRIPSAVGYQPTLATDLGGLQERITTTTKGSITSVQAVYVPADDLTDPAPATTFAHLDATTVLSRSIAELGIYPAVDPLDSTSRMLNPNIIGAEHYNI…
>CRv4_Au5.s17.g7027.t1
MAFASSSMAALSRPLAAVSSGLGSALSRASQLLTSGSLSSSPTASHSSTRRFISDGTVGSKGRPDSLFLSDISMSGHRAPLLLGWLNYLERHLPHVGFFEPIGGRALAGSELSVDRHVELMYRVFNMKGDATRMTGISDTEAAQLIASGKQSEVLDRIYAAYMAYKAGGELDLCLVEGPGPLMGGTELDAQIAAALNAPVLMAMSGRPNATANDYYNKAMVKRQVFADHKVDVLGVVINGLPREHHAILSSQLRDKLERAGLPFAGALPEDPVLSSVRLDEVRTALGATQLYGETWLGDVEFDEVVVGSQRLEELLETLVERPMGRPLVVTSADRLDIVLGLLAAQLSVRGPSVAGVLLTQAGASRITRSYAKSAVDNIFAGLSNNTGASGGGPDGAAA…
>CRv4_Au5.s17.g7043.t1
MVPGYPLVDGPMPHKRMSYAPLDRSKPYAIGHRGDAGEFPEHSSLAYLSGIKHGADFIECCDVVLTKDYVPICRHEPLLSNTTNADSVFPTKKRTYVIDGYNSTGVHAIDLTLKEIRKLRLRERLYSRSQVYNDWYPVITFEECIHFAQHAPRVVGIYPETKHPTWHDTLIKARKGKTTITDQVLYYLKKHGYGAALNTPEWLAKPVFLQSFESNNLAYARTKSQVPIIQLMDDFTVPLPDRSFPNYGAMMTSDALAKIAKYANGIGPWKETLQQTVTRTDGTQYLNSTGLVERAHAAGLQVHLYTLRNEPNYHTNTLTSIEDEYAYYFKTLGVDGGFTDFPGTLAQWLRNEVAKNTTWPALKI
>CRv4_Au5.s17.g7048.t1
MRAVAGDRVTTSDVLKALSKAVASSVGKPEQWVMASVTTDKPMIYGGTEEPCAFGYLMSIGSIGGDKNKKISAAICEVLTAKLGVPANRVYIQFSDAKASDVGWDGSTFA
>CRv4_Au5.s17.g7064.t1
MLCARSQLVCKPVKAARASRATVKVQAFQVTLRMPSGKTKTMEVGPDEALFDAVERYDVDLPYLCRTGTCGTCAGRVQEGQVELKGQHILDPDQVKAGFILMCSAYPRSDCTILTHQEERLHTCEYGKHQ
>CRv4_Au5.s17.g7079.t1
MALGQQAMQRKGALNANRASRKACVVRAQAVASAPQQPATASQYVPHVQGPIIMNGQVLHSITAERLDVVRSLEDGYLQSQVVPLLKPVEKCWQPADFLPPSEDPDFLDKVRELRKRAANLPDDYLVVFTGDMITEEALPTYMTMLNTLDGVRDETGASQTPWAKWTREWTAEENRHGDVMNRYMYLTGRVNMKAVEVTVQNLIGSGMDPKTENNPYLGFCYTSFQERATKVSHGNTARHALEHGDDVLAKICGSIASDEGRHEIAYCKIMDGLFERDPSGAMIAFGDMMKKQIVMPAHLMNDNVHHANTGRNLFADFSAVAENTGTYTAMDYADIMEHLVGRWNVKNLTGLNGDAAAMQEYVIKLPDRIRKLAEKATARRKKGKVVHAPFSWVFNREV…
>CRv4_Au5.s17.g7096.t1
MFGKRLDLTGKHALITGGSTGIGLALAAECVRAKANITIVARTEATLKAAKAQLEELSQKLGTGSRVAYQAVDVTDVQKVAEGLAAAVQEFGPVDLVVCNAGGARCGYFHEIELSDFNRQMQVNYFGVLHVVHAVYPDMVRRNQGHIVIVGSALSTFGMVGYSSYCPSKYAVKGLADCLRNELQGTRVKVSFAQPPDTDTPGFVEENKSKPPETKEISEAGATLYKPEKVAACLMSGIRSGAYLLPNPDPGLAFLALTSQGLLPRSFPGILLELLAALVAPLVQWGFAAMFDRVSRKFAPRRFDKLWGGMEAASAKAGGGGGSTEKASALGSASGSGAAL
>CRv4_Au5.s17.g7113.t1
MLPALTGKLLKQATGSLAALSQCQQLRFFNVHEYQGAQIMSKFGVNVPPGIPATTLDEVKKAVDQMADEKGEVVIKSQILAGGRGLGKFTNGLQGGVHIVPKAKALELAKQMLGATLVTKQTGPAGKPVNTLLISKKMKLKREMYFAILLDRKTAGPMMIGCSEGGTSIEDLAEKFPEKIIKIPIDIRVGITDAQAMQMVEGLRVTGDKAAAAKQIKALYTLFDKSDCTMVEVNPLAEGLDGSLIAADAKLGFDDNAAYRQKPIFDMKDESQIDPREVAASKYDLNYIGLDGSIGCMVNGAGLAMATMDIIKMHGGAPANFLDVGGSANEQQVVEAFKILTGDKQVKAILVNIFGGIMKCDVIASGIVNAAKQVGVQVPLVVRLEGTNVARGKEILATS…
>CRv4_Au5.s17.g7115.t1
MSNATCTNLFGLTQYDGQCQFFGSGDTALPEGLGWFILVGLGGVFALIPTALIYLDRRINGGGKDSESFATAGHTIGMGLTACDIVAKWTWAATLLQSSNVAYSFGVSGPFWYAAGATVQVLLFAILAVEIKRKAPTIHTFLEIIRCRWGNVAHIIFMVYGFMTNLIVTAMLILGGAAVMEALTGVSVYASSFLIPAGVVIYTCVGGMKGTMVAEWLNVCVIYIALLIFMFQARAWLCVYATNPDLGSISKVWQRLSAIAETKPVVDNMGGSYMTMFSKSGIIFGIINIIGNFGTVFVDQSYWQGAIAAKPSATYKGYLLGGLCWFAIPFTMATTMGLGARALDLPITKAEASAGLVPPALAVHLMGQGGAFLITFQLFIAVTSTACAEQMAVSTIVVY…
>CRv4_Au5.s17.g7138.t1
MADVEAKKEIIKNAIRGIPDFPHKGILFWDVTTIMLNHQAFQYSIDLFAEQYKDKKIDVVAGFEARGLIFGAPLALALGVAFVPLRKPGKLPGDKISEEYKTEYSTDKIEMHVGAIQPGQRVVLVDDLIATGGTLAAGINLVKKAGGVVVEAACVIELPFLKGRDKIQGTDLFVLVEKEGL
>CRv4_Au5.s17.g7160.t1
MMEQHKGDAKECKKKGVVKEVLGSGDIFVIKVGTSSLVRPEQQTLNLTNLARICETIKALKKMGHHVVIVTSGAVGVGCQRLGLATKPSQLAKKQALAAVGQVHLMKFYEDFLAALGLTCAQVLLTLDNLANRSQYLNARNTFTELLAYGVIPVVNENDTVAVQELRFGDNDTLSAQVAALVQADWLFLLTDVDCLYTANPKDDPNATPIYEVEDISRLTADTSTRGTQWGTGGMATKLTAGRIATAAGCTMVICNSTAPENIVRIVKGEPKLGTKFFPLPHSLKGRKRWILSVPVRGQLWLDAGAVRAVRDKHKSLFAAGITKVTGDFHAQDCVSLCDSSGVELGRGLVNFSTEEVAAVHGHGHAHGQGHKEGGGHHHATHPVAEQLGFPTMEEVVHR…
>CRv4_Au5.s17.g7191.t1
MSSDNGWLGTLPPYIKAKAFLRTDAYGTYANNKLSLALKLRLVLVCLTLVPVKLFASLFCVVSYYLFISVGNVVLKEPYKTKYMAFWGRFWTRMLLYALGFWTIKWVYVSPDGSTSSTAPAGFLERRFGGYVSNHCSWVDIVLYMSRLFPSFVAKKEVSNLPLIGAISKAMQCLFVDREARLAAAAAEGGKAAADAAAASGGQGMAQLVRERMARKYELGSAELPMMLFPEGTTTNNKYIMPFKRGAFVAGVPVQPLVLKYRGSFRFSPTWDAMPGHHHIFLTMTELRYGVTVHVLPMYVPSQEERDDPALYAENVRQMMVKYTKIPSCEDTFGDKLEFFKYVTGRMAADKKTQQGKQGQGPAGSDKADVAATGQNGGFTVHAKAS
>CRv4_Au5.s17.g7207.t1
MVSVAAAPSTSVSVAPKKGTAEATAARSYHDDMKCVLWTASDLSSRIAELGRQIATDYEGKAPLVLGVLKGSFMFYSDLVRAIEPCPRGLTMDFIRASSYGSGTESTGDVKLKTDLKKEKVAGRHVLLVEDIVDTALTITTVIRYLEEECDVASVRTATLLDKHERRALSYKPEYVGFTCPNEFVVGYGLDFDEEYRSIPYIGVLKPECYAHLGIKPEPAESGESGDE
>CRv4_Au5.s17.g7221.t1
MPLFNTLVDAVAADESYLEATLRPAAAQDAFTGRLLGCLLATRPERQALRGSGREVVLGVHRSDYMLDAPSGKFLQVELNTIASSFGCLSALMTRLHGYMASGRISGLDASRLPPNPTLEHIPDAIAAAATASGHVAAGGVVVMVVQPGERNAYDQQWIQLQLWERHRLRTLRLTLADIAAGGRLDAASGTLTLPGGQPAAVFYFRAGYTPADYPSEAEWAARELIERSNAAKCPTVAYQLAGTKKVQQDLATPGVLERFLPPATAAADAALLREFFAGLWSLDPRDLAADAGGAAAAVRDAIARPEAYVLKPQREGGGNNLYGEELRAALQQGGEELSAYILMQRILPPVNRSVLVRNGQWQEAETLSELGIYGTFVRHNNAVVVNQQSGHLVRTKTA…
>CRv4_Au5.s17.g7241.t1
MKPRKWELKVPAQDHVGAMKGILDFIKENVSATFASEVVAVGHRIVHGLDLSQPVLLTPSSTATIKQAAVLAPLHNPPGLQGIEAATEVFSGVPQVAVFDTAFHQTMPPHAYMYGLPYELYEKHKIRRYGFHGTSHKYLVEQAAAMLGKPVSDTNVITCHLGNGSSVAAVRGGQCVDTSMGLTPLEGLLMGTRCGDMDPAVVLHIQNQCGLNVKETDTLLNKKSGLLGLTGSNDLRAVIEGAGKGELRSQLGLDMFTYRVRKYIGAYTAALDGKVDAVVFSAGIGENSPFIRKLIAEPLHAMGMQLDHAANDTAVGRAGVISTPGSRVQLLVIPTDEELSIAEQTLQVAKGALGAAAA
>CRv4_Au5.s17.g7248.t1
MAHARAATHGRCHRARPGARPSRSRPLAERRVVCGHASAAAAPSAVPQLPSPFDSITAERGFLPSPDPRRALVLSRHNDAAAAWEAALAELPKLAVAVQSTSTDVVSSSISNGGSGVSKGVLRRTLEALPPFPLGQLLLLDSAGHSSAAPAHGEQQQQDDHGEELWRAYLLLSFLAHAYMWCEPGPPPAVLPAVLAVPWARVAAAVGMPPILTYATYNLYNWRRLDPSAPVRLGNIVCLHNFLGGPDEEWFRLVHVDIEARAGPAVAGLARLQQAAAQDDAPSVLAGLRGVSSALREMQGTLSRMGEKCDPYIYYQRVRTPMSGWRNNPDLPQGLIYEGVSDQPVQLYGETGAQSSVLHAFDAALGVQHEQVWLRDYLGTMVAHMPPPHRAFLAALAAA…
>CRv4_Au5.s17.g7267.t1
MTVTRRKGVNIQADATDSAGEKQRYPAAPPTFSLGDIRKAIPAHCFEKSALRSFAHLAVDVTVCAWLWYGSTFIDHPAVPRYLAWFVLWPLYWFWQGAFMTGIWVIAHECGHGAFSNSEALNDGVGLVMHSLLLVPYYSWKHSHRRHHQNTGSTAKDEVFVPAVKPAGTKAPWYHRNPVYRLGHILFQQLLGWPLYLLFNVSGHEYPRWANHFDPFSPIFTKRERIEVLVSDIALAVVVAGLAAISRTWGFMFLLKTYLIPYLVVNHWLVMITFLQHTHPKLPHYGDGEWDWLRGAMATVDRSYGVLDHVFHHIADTHVAHHLFSYMPHYHAEEATEAIKKVLGDYYAYDSRNVFRALWDEVGGCAVVAPDTNGPEQVYWYHR
>CRv4_Au5.s17.g7269.t1
MRSIRIPHPHIGLALRDRHFVTALLAECLGVLLFQLLAGSLGPGPVETATAFAAIMYFVGPLSGGHLNPLVSLAGAATGHIDLVRGLCYAVAQILGAILGAILQVWLITDFSFGAPSDSCLAPPKHVSGPQLWGWETLLSFFFLAVMYSSVFVAPGHGGAAPLAAGLALLAALSTGGFYTGGSPLNPARIFANMVVFRCDAVWGWTYLAAHLAAIGAAVAWVWPVHGLGMFMGGPRPDAFTGAANTLGGSSLTDPFLAGTTGSSSGAPAGPTSGTGARGTGGMEPASAGGYV
>CRv4_Au5.s17.g7309.t1
MKDLAICVGVATALWFIPPPAGVTAKAWHLLAVFIGTIVGIITTPLPLGAVAIIGLGAAMITKVLTFAEAFSAFASEIPWLIAIAYFLAGGFIKSGLGNRIAYMIVGALGKTTLGLTYALVFAEALLSPAIPSVAARAGGIFFPLAKALCLACGSDPEKGTAKKMGAYVMTTCFQTTTVSSAMFITAMAANPLAVNLAASAGINISWGTWALAGLVPGIVCLICVPLILYALYPPEVKDTPDAPATAAKELAKLGPMSTNEVITAGAFAITVALWIFGGSIGVNAVAAAIVGLFILLVTNVTNWKECLNNNAAWDTLTWFAALIAMAAALNKYGFIPWLSTSVVNIVGGLGLGWQGAFGIVVLLYFYSHYFFASGAAHIGAMYTAFLAVATACGTPPML…
>CRv4_Au5.s17.g7310.t1
MALCSFSKSYNELALGQQPAMGHRSALLQQRRISVRTCVAQPSTSSATSSAATFELREAVLKGNHFTQPQAEVMLSVFPTPKDLASKDDITRLERKIDSRFDKVQLLAVQLALAVVIIVGIMLLLPLNPVSAVGMVVSAFINKNI
>CRv4_Au5.s17.g7311.t1
MATLLRAQGLRAGLPTQQRKVAPAPAAFRASATAPALRSVVGMSALPLHNRVHQKTTTVGRRSLNVVAQAASSPAPAPAKPAFKWGANMKDLAICVGVATALWFIPPPAGVTAKAWHLLAVFIGTIVGIITTPLPLGAVAIIGLGAAMITKVLTFAEAFSAFASEIPWLIAIAYFLAGGFIKSGLGNRIAYMIVGALGKTTLGLTYALVFAEALLSPAIPSVAARAGGIFFPLAKALCLACGSDPEKGTAKKMGAYVMTTCFQTTTVSSAMFITAMAANPLAVNLAASAGINISWGTWALAGLVPGIVCLICVPLILYALYPPEVKDTPDAPATAAKELAKLGPMSTNEVITAGAFAITVALWIFGGSIGVNAVAAAIVGLFILLVTNVTNWKECLNNN…
>CRv4_Au5.s17.g7318.t1
MLQGRIAAVDQRTSVRRSGMHVRRDARAGSVRSAAAVLWARPDAQGFLPAIEPQVRIQLDDPAVQEWEQALHELPGAFGAGSGTQLRERLRRLPPFPTDRLLPPWTSPGRIPSLQPPLACIGGGGTGGSRSGGGGGSGGGGMTGDVEAYVWCEPGPPPAVLPAVLAVPWARVAAAVGMPPILTYATYNLYNWRRLNPELPPVLQNLSSINNFLGGPDEEWFRLVHVDIETRAGPAVAGLARLQQAAAQDDAGAVLMGLSAISESLRAMQTTLARIGECCDPDQYYSRVRPPIAGWRNNPLLPYGLVYEGVYGGAPVQLYGATGAQSSVVPAFDRVLDIRHEQGRLRDYLGTMVAHMPPPHRAFLAALAAANNNTGTGTGNRTNSGASTNSSGGAGRGQD…
>CRv4_Au5.s17.g7321.t1
MSPEDSIDWTRAGVPAYLQSNVDFNICGEESQALTLGRAGEMMWKQIRTEAQADANSEPLLSSFLYASILAHDTFEQALAFVLANRLANSTMLSTQLFEIFHNFLSKEPDVRCAALSDLAACRERDPACSSYSHALLYFKGYHAIQTQRIAHALWNRKQKVMALALQSRISEVFAVDVHPAARIGKGVLLDHGTGVVIGETAVIGNNVSILQNVTLGGTGKEIGDRHPKVGDNVLIGACATVLGNIPIGEGAQIAAGSLVLKPVPPHTMVAGSPAKEVGPVVGNPALSMMHWSQRLLSAESMDGAGGVGMNGVPLAAAMAPVNGLANGIAKPAAKVALGKAAAAAAAASASAAPASAAASVQAAKKAAAKLGGAAKAAAAGSPAAPAGKAGTPSGDVSQ…
>CRv4_Au5.s17.g7349.t1
MFALRAPVARPSAARSVQSGVASRVQRVVPRAAKTEEVEAATNGAAASNGHASANMMQFDELSDIIRLVHDTDIVEFELKSKRFSLSVRKKEALQAEQAAAYQAMLPQMLAAAPVAPIAAPVAAAPAPAPAPAAAPAAPAAAPAPAAAPKGIEVASPMGGTFYRKPAPGEPEFAKVGDKVKKGQTVCIIEAMKLMNEIEAEVGGEVIKFLVENGQPVTVGQPIMIIKP
>CRv4_Au5.s17.g7362.t1
MDTSRKGFQLVIAATPSLGIGKNGKLPDWQLPGDMAYFKELTSRTRDGAHTNAVIMGRKTWESIPAKFRPLKGRLNIVLSRSFADDADLSADQNSSAAAKSAAAPDASSSKPAADAYANAQKHGSGLGSGVLGVGSLESALSLLEHKELKGGVEGVFIIGGGQVYAEALAHPNCTAVHLTQVEKEYECDTFLPALDPAVWGVWSSSEPVTENNTRYSFVCYTRRGTEQAPELPPCMASRHDEQQYLELVRELITSGVFRPDRTGTGTYSRFGRTSRYNLRHTFPLLTSKRVFWKGVAEELLWFISGATNANLLRDKNIHIWDGNSSREFLDGRGLGHREVGDLGPVYGFQWRHFGAEYKDMHTDYTGKGVDQLRYIIDTLKKDPNDRRMVMSAWNPAAL…
>CRv4_Au5.s17.g7448.t1
MVFKFPTPPGTQKKAGTTATKPAPKATTKKVATSTGTRSGGVGYRKYQGDALWLPNTTRPEWLDGSLPGDRGFDPLGLSKPSEFVVIGVDENDQNAAKNNKGSVEAIVQATPDEVSSENRLAPYSEVFGLARFRECELIHGRWAMLACLGALVAEATTGVSWVEAGKVELDGASYAGLSLPFSITQLIWIEVILVGGAEFYRNSETNPEKRCYPGGVFDPLKLASEDEERAFRLKTAEIKHARLAMVSFFGYGVQALSTGEGALGSLAKFADGLNNGKGL
>CRv4_Au5.s17.g7462.t1
MMTVQEFIAAIADSLLPRLPALLQAYWVLASSAVLLTLLPLPIVPSAFKAAVKLAASRGKLWHDRPDAKALGFLKDVSVPQQYFEHFYLVGSLVTTVLLQVYIFVCTPDTDGSTLKRDSLLALFLFELHVLRRYGESNYVMHYPETARMHLLAYLFGLSYYVVAPLTLLPAFVMDVGVLRGAWDQALGGGKDLAGVDERLYAAVLAPHPGKYRLAGALALYVFASILQFVSHLSLARMSREASQRATEFAVVDAINKGNRAGVVGAIPTPAGVVDADGKPLTAKVVHLYEVPRGGVFNLVSCPHYLAEILIYAALALVTSGSTGSLLMAGWVFLNLVLAAAATQRFYRTRYPNDYPKSRAALIPFIL
>CRv4_Au5.s17.g7486.t2
MAAHGEPAQPAVTATVTTTNGGHRSALNFPDYRRSVAFKYVKRGYTFLMSYVLTIALVPLAGMLLLELVNMHRTGELTRLVGVAKQTDLTFNLVTVIATIAALMGVVISYYILRTRPVYLVDFQVYRAPDSWMATYTRFMAGSRKCGRFTDEALEFQEKIMTRSGLGQETYLPPAVQTVPPECTMENARKEFEMVVFPIIEELLQRTGVHPKQIGVLVLNCSLFNPTPSLTAMIINKFKMRSSILSYNLAGMGCSASPISIDLAKQLLQLHPSTYALVVSTENITQNWYFGNDRDKLLPNCLFRVGGAAILLSNRRRDAWRSKYELMHTVRTHLGAKDEAYSCIFQMEDSERNIGVRLTKELFAVAGEALKINVTTLGPLVLPLSEQLLFFFNLVARKV…
>CRv4_Au5.s17.g7510.t1
MKRNTSNVDTGGVPAPLNSTPSTRLIQNGYGDSKYETERMEFPFPEDPRYHPRDSVKGAWEKVKEDHHHRVATYNWVDWLAFFIPCVRWLRTYRRSYLLNDIVAGISVGFMVVPQGLSYANLAGLPSVYGLYGAFLPCIVYSLVGSSRQLAVGPVAVTSLLLGTKLKDILPEAAGISNPNIPGSPELDAVQEKYNRLAIQLAFLVACLYTGVGIFRLGFVTNFLSHAVIGGFTSGAAITIGLSQVKYILGISIPRQDRLQDQAKTYVDNMHNMKWQEFIMGTTFLFLLVLFKEVGKRSKRFKWLRPIGPLTVCIIGLCAVYVGNVQNKGIKIIGAIKAGLPAPTVSWWFPMPEISQLFPTAIVVMLVDLLESTSIARALARKNKYELHANQEIVGLGLA…
>CRv4_Au5.s17.g7516.t1
MESSAQARLAVLSRQFAPVAEGMQSLSLQTCSAGDSAAYERRNTADDDVVIVASLRTPLTKAKRGGLRDTDAADLLSTLFKAVLERTGVEPQAIGDIVIGSVLGPSSQRANECRIASFFAGIPDVVPVRTVNRQCSSGLQAIADVAAAIKAGFYTVGLAGGVETMSSNPMAWEGGINPRVGDFPGAASCMLPMGVTSENVAAKYGVDRKTQDEFAVRSHKKAAAARAAGKFKDEIVPVATKLVDPKTGAETKITISEDDGIRGSTTMETLGALKAVFKKNGTTTAGNSSQVTDGAAVALMMTRAEATRRGLPILGVFRAFAAVGVDPAIMGVGPAVAIPAAVARAGLSLDDIDVFEINEAFASQAFYSITKLGLDEAKVNPNGGAIALGHPLGATGARC…
>CRv4_Au5.s17.g7529.t1
MQALATRPSAIRPTKAARRSSVVVRADGFIGSSTNLIMVASTTATLAAARFGLAPTVKKNTTAGLKLVDSKNSAGVISNDPAGFTIVDVLAMGAAGHGLGVGIVLGLKGIGAL
>CRv4_Au5.s17.g7556.t1
MLPSQTHAVDGFAWVEDISNISSSLYGCLFSQVDPHVWQPRLRLGTTSGDTVASTPIPNSLDHPWSHLRPFHFTFLLPAAHESDFCFKVWEASFPDNRAPFCLPPSSAALCHRLAPAAAYTPDRPALWSVLIPLRSMGAPWGTHVSRTTVRLHHHLAYLRENMLMLRFANPIFSAFFNRHYISNIQITFKEPFGTEGRGGYFDSYGIIRDVIQNHLAQVLALLTMEAPVSLHPDDIRDEKVKVLRCIAPAGLADCVLGQYAADKGQPGYLDDPTVNPGSRTPTFAAVRVFVRNERWDGVPIIIKAGKALNERLAAVRIQLRTPPASIFGPLDHMRNELVVRFQPGEAIYAKMVVKKPGLEMDFEMSELDLSYPERYKGVVIPDAYERLILDCIRGDQQH…
>CRv4_Au5.s17.g7569.t1
MLDRKPVRTPGKKLAVLPSHPLALAVAAEWEWQEKGKPQLHTMPMMSLVAHALDQPRPRDKVIAHIMNYVHTDAACCLYERGTLARRQQEVFGPILEALRQDAGWRFLMSDNIAGSHQTDELVEGVRAWLAGLDDWHLAAMEQLTGTTKSVVIPAALLRGHITPAQALAAARVEEDFQAEEWGRVEAGHDLDEADLRSRVFGPSLFVRLLQMR
>CRv4_Au5.s17.g7577.t1
MVKGVLATHFQSYPKTAFRFFSGVMQRLAPLRAKAQLAELTPGIRAKPASKVRDATTRLEYAVLIPKSAIPDLVTLLDEDSSFTVPAGTSYGRDIGHPHPVQRAGSLRLTAVGLCKAGLFAVTLPHGAAFELGRYQANLEAGGETYTLDVRRMSRRQGGQQPGGPCAAAGGAAAPGGAAPGATGAAAAGGAAWGRGDATGAAAASSEAQGRGGTTGGSAAAGAAQGHRGAAGAAAAGDSAAQGRGGAVGGAAAGGSAGDRGGTPRGHAAAGGAAQGRRGAAGAPAAGRATPAPVDAAGTSATGGTARGRMGPAGGHAARGAQQGRKSAAGASAADGAAQGRAGAAGAPAAGSTPQGRKRPLRPTIGVRLRRSAGAAGASGTGGATRRRGQHRRPAAAAP…
>CRv4_Au5.s17.g7580.t1
MKLQTSQGQALRTSRPAVRGLPALSRRPVRVSAIAAPEKQSTPASLNGTSNWQPTSWRSKPVVQQPEYLDKQEVVKACEEIARMPPLIFAGECRTLQSRLAKASTGDAFVLFGGDCAEAFSQFSANRIRDLYRLLLQMSIVLAFGGGVPIVKLGRIAGQFAKPRSASTETIGGVTLPAYRGDIINGPEFTEEARRCDPWRLVRAYNQSAATLNLLRGFSYGGYAGLSRVSQWELEFMKNTPEGHAYMDIAKRVDEAIQFMIACGMDTNMPFMRETEFYTCHECLLLDYEEALTRLDSTTDKWYGCSAHFLWCGERTRQLDHAHVEFLRGVNNPIGVKVSDKMDPNDIVSLIASVNPSNTPGRLSIIVRMGAKALRAKLPALIEAVQRSGQVVTWVCDPM…
>CRv4_Au5.s17.g7620.t1
MLSRLGLGLLARAAVAGGEGLAARAFGTGSAYLPLPGDARSQIVTLIPGDGIGPEVTKAVVDVVAAMQAPITWERFDYLSGSEETAAGSVPRTSVPKEVLDSIRRNGVCLKGTLFTPLNKENTNTQSLNVQLRKDLDLHVNVVHGFSIPGLPTRYNNLDIVVIRENTEGEYSGLEHEVVEGVVESLKVITYEKSLRTAQYAFEFAYLNHRKKVSAIHKANIMKLGDGMFLKACREVARNFPNIKYEEVIVDNTCMQLVNKPHQFDVMVTPNLYGNLVSNVVAGLCGGFGVVPGGNIGDGVAVFEQGARHVAKDLAGAGVANPTATLLSTAMLLRHLKLAGFADRLEAAVLKVYTDGDEAALTPDVGGSGTLLRFTEAVVRNLQE
>CRv4_Au5.s17.g7623.t1
MLPLQQQPWRSRSSFGEARRPQNTSRPRRVECRLSASARGQLTDPDYAHLEAAARLAGSPEGETQPHPNAACRLVGPDGRTVISQAFLRAQGTTSAEVLAVSAAGPAARGGTAYLNLEPGDCHGEGAAVEALVRSGVSRVVVGLRHPLRHLRSRGIGLLRNAGLRVDVLADELALGRNGTPSQLAAGLVHAGAGSMGSGSDSDGPFAPGAGGPAAAYSAMAACLNANEALLHRAALRRPLGVLKYAMTLDGKIATNLGHSAWVSSAQSRALVFETRARSDAVIVGGNTVRRDNPRLTTRREGGHTPARIVMSRTLDLPEDANLWDVTLAPTIVLTQRGARTRFQSALRAQGVEVVEFDFLTPESVADYCQERGFLQCFWECGGTLAAPAIASGVVHKVM…
>CRv4_Au5.s17.g7679.t1
MTFWCSSRVVASEVFGEVPWDFFTFPEFPYELAPGDLAARAEAQDFPSGEIVQEYIEAYCKHFKLDRHIMFGVKVVHIAALPQFGNASAPTTAAATAAATAAGGGLAAGASLHGGTANLPNPAGGPGTGPRWAVRFRQAMRPGQSPDVGELKTMECDVVVMATGMYFSPYVPFVQGMADYKGTVLHARDFNSLEPLKGKRVLVLGAGKSAHDCSVLAASEAAKTASVTTLFRQAHWPLPREIFGIPFHKIVYTRFTAAMLPAYYTAEGRLGKRVKHTLLSPLKRLFWGALERHVAGRMALRGHLRPERGFVQDLFFGGQIQDGSWNEAVNAGRIKAVRGSLAEVLPGGVRLTDGTVLDCDVMLFATGYTKDYSLFDAATASRLAATPGSSTEEGLHLYR…
>CRv4_Au5.s17.g7684.t1
MALQQQSVRLVLRNVNGLARGLATQGMAGMGASSVPTEQVVCQSKPVMQASASISLATPSSIASGIRASAKASPMSLAPQRSMSVLAASKMVGAGCATIALAGVGAGLGVMFGSLINGAARNPNIAKQLVGYALLGFALTESIALFSLLVVFLILFA
>CRv4_Au5.s17.g7685.t1
MASSQKAVQMSLGAVRSLSTGMTRLQAASAQGMLASSQGAAGQMEKPVMVATQVPILGASPSAIASGIRASAKASPMSLAPQRSMSVLAASKMVGAGCATIALAGVGAGLGVMFGSLINGAARNPNIAKQLVGYALLGFALTESIALFSLLVVFLILFA
>CRv4_Au5.s17.g7691.t1
MADLEGALSFKPSPSVPLYKDLGAVYKGVPGVEERYKQITEAFKKAYGAAPDFYARAPGRVNLIGEHIDYEGYGVLPMAIRQDTVVAVRRVPGSTELVIGNVEDDKYPTQRFPADPDQTVDVANHSWANYFVSAYKGAFELLRATRPDDVPAPCGLEVVVHGQVPTGSGLSSSAAIVCSSMLAILSAKGVAPEQLDKAAVAEAACKAERYVGVTSGGMDQAISMMGQQGVAMHVEFNPVRGVCVVLPPGATFVIANSLAVSNKAETAPKRYNLRVVECRLAAVLLAMSLGMSREDALAKVRTLRDVEPLIAEQHSGAHDGATCAAAVAQHLKESYSLAELEEALGGKLADILFAAEPGSVRALQVAEQDKYAFPLRKRAVHVYTEAQRVLDFRAVCEDA…
>CRv4_Au5.s17.g7701.t1
MLLPAEVGDYTDFYASRQHATNVGVMFRGAANALQPNWLHLPVGYHGRSSSIVPSGVHVHRPRGQLLPAGAAAPVFGPSAQVDFELEVAAVMGPGNPLGCPIPLAEAWSHVFGLVLLNDWSARDIQKWEYVPLGPFNGKNWATQISPWVVTLDALEPFRTALPPQTEPEVLPYLREEAPYRVTYDVDLAVDIVPAVPHDSGSGSGRAATVTRSNLKNLYWSFAQMVAHHTAGGCSLRPGDLLGSGTISGDTPGSRGCLLELTWAGRDELELRAERRQGEELEGGAAAEGPRAGAGGVGEEAGGGAGAGGELLGRRRYLEDGDTVVLRGWCGGGGGKRIGFGRCEGKLLPCR
>CRv4_Au5.s17.g7726.t1
MATSLMKSSLALHAAPRPRSVRLSATSSRVDSPQVSVVLGTQWGDEGKGKLVDNLAQQFDIVARAQGGANAGHTIYDETGRKFALHLVPSGILNPKATCVIGNGVVLHLPGLFEEIRRLKEKGVQVDGRLLVSDRAHLLFDLHKEIDGLREAELAGDGKQIGTTKRGIGPAYSSKATRNGLRVCDLFDRATFKTKLTNLAADGAKRFGEKFAYDVEGDIAAYEKLAEEIRPFVVDTVEYLHEALQSGKRILIEGANATMLDLDFGTYPYVTSSNPSIGGIATGLGLPPSSYDDIVGVAKAYTTRVGAGPYPTEIHGKLAEDLRAVGHEYGTTTGRPRRIGWMDIVALRYACKINGVTHINLTKLDVLDNLEEIQVGVGYKTKEGKMLKSVPADLHTLEN…
>CRv4_Au5.s17.g7728.t1
MQLNVRSTASGARSSTRSRRMTAVVQAVAQRAGTIDVQRNENFGKLRAGYLFPEIARRRKAHQEKNPDAKIISLGIGDTTEPLPKYIADAMAKAAAGLATREGYSGYGAEQGQGALREAVASTFYGHAGRAADEIFISDGSKCDIARIQMMFGSKPTVAVQEPSYPGYVDTSVMMGMTGDHNGTGFDGIEYMVCNPDNHFFPDLSKAKRTDIIFFCSPNNPTGAAATRAQLTELVNFARKNGSILVYDAAYALYISNPDCPKTIYEIPGADEVAIETCSFSKYAGFTGVRLGWTVVPKALKYANGEPVHADWNRVMTTCFNGASNIVQAGGLACLQPEGLKEMNAMIKFYKENAQILKTTFTEMGFSVYGGDDAPYIWVGFPGKPSWDVFAEILERCNI…
>CRv4_Au5.s17.g7762.t1
MEGKPEAFAGFSRNEQAASNSSLSGDVQAELTEWNQRYLEKFGFIFIIFAKGRSAPEILAALKKRFNRLPHEELHTAAAEQMKITELRLSGLFALPPDAADRAARRAEQVLTHLAPGHGGAPLRSPITTHVLDTATGLPAKGLPLALSRQDELSKVWETVGEGVTNEDGRVGNLLPPGNYIQPGRYRMFFDTAAYLGACKAAHPAFYSEVPFYPEVVVEFIITADKASEHYHIPLLLSPYGFSTYRGS
>CRv4_Au5.s17.g7809.t1
MDGNHRWGTSHGGDWRRGHEEGVNALRRVVQFCREDGVKALTVYAFSCENWGRSASEVGFLMGLLERTLDAVLPDLQKHGVRLTFAGDRAALPESLQRAMQRAEAATGSCTGLVLCVALSYGARQDITRAAQELCRRVAEGSLAPEQVTEQLLAAQLSTHAATAAATSSGGGVTGQVGDPDLLIRTSGEQRLSNFLLWECAYTELYFTDACWPDFDRPHWDAAMQHYATRTRRFGRRGRADGAAAAPATSEPQDGSSRSSSSAAAASASRPRPGKAPL
>CRv4_Au5.s17.g7885.t1
MVLTLIPTAVLRLVRACMGLVGVTEHRWRGISLHVPLTLEDHKHLELLAANLVAGRLGRRPEAPERGPVPPSQQLTLDVHAILAAASSTAAAFGLPYEGMPEAALHSKLSTYIRGVASSETVCTQDCFKAMRKLGRKTMESLCAAAQRSPAPAPSSSSKSGGHKGLRSSPSASSMMVKPKPKAVAKAFMSACLMQLSRAHAETLIQLVAALPDGSDLVEAVSLISLAPGAEYLRLLGEERFAEQLEAMSEFGRLRPSDAKKEPEMQGMAINARVHEVGVVRHVRAPAPAPSLRPAGAVAEAQADSVASSMKTIGAASVRGVTRGISNDATADLPVLMSDGSASERAGANGMGGYTGSGPNGLRAGKPAARGWMAEFDDDDGEAEEEEGLAFGKPAARAH…
>CRv4_Au5.s18.g7924.t1
MLRNAARRLMAVGQRGISTSAMTMEEVAVPAGPKEFTEAWNKKAPSQLLVPELPSNFTNVSADNQTQGDLFPVNFYTPSSVLADGVKKDGVTLPGIDGYFGVKANHVPVIAQLRPGIVELSSGADTEKFFIAGGFAFVHPNGVADICALEAGTLDQFDPAAVKSALAAANSAQGQGDEYDQAANRAALELYAALDSALDQKS
>CRv4_Au5.s18.g7938.t1
MPRVKALELYDDPHRELLIESEVIMEFLEDAFPDAPPLLPREPLARSKARLVSRFHDLYVEPALRRLYPQVAPSARDPRLVQEAVATFKERLAELAALLPPVAAAASPAAAAGAPDAAASGSSQDNIRGSSSSNAFALGALHPGGGLGLGDCAYPALLLYAELILPVLEPQTGPEPGPGPGSAAGTDAGLSSGAALGSGLVEAGEGLEGGRSMRAVYAAHPRLWAWRQALWGHAAVREVFKDLRPAAEEWVAMKLKQ
>CRv4_Au5.s18.g7939.t1
MAMLSSRRVAAPAKASAIRRSRVMPVVRAAAASSEVPDMNKRNIMNLILAGGAGLPITTLALGYGAFFVPPSSGGGGGGQAAKDALGNDIKAGEWLKTHLAGDRSLSQGLKGDPTYLIVTADSTIEKYGLNAVCTHLGCVVPWVAAENKFKCPCHGSQYNAEGKVVRGPAPLSLALAHCDVAESGLVTFSTWTETDFRTGLEPWWA
>CRv4_Au5.s18.g7940.t1
MKPFTLFVNGEELHAPVEMANAPLAAFLKTTRFKSVKIACGEGGCGACTVALVEQSSEGGAPSLRTINSCLAPVYSVRGKSILTAEGLPPAATAAATAAATPATAGGPAASSVVVERLAAHHASQCGYCTPGFAVACHAALHNAANGCSGSSSNGHAHSNGNGCSSNGGAAAAESAPLLDGEGLRRALDGNLCRCTGYRPIVSACRSVGVADIEDLAGPPAAGAALLLPPRAAAAAAATADDVEEVALGAGQVLKVPRSLAALVAESGRLAAAAASAAATGSFSSWRLVAGHTGPGVYKDWPLAESVLLSVNEVPELRRLQQTDDGLVVGGAVTLEALAAHLDGKLAAGGGGGGVGSVGGGVKEWAAETAAHLRRIAGTHVRNAATVGGNLVLTAEAAL…
>CRv4_Au5.s18.g7949.t1
MKLRQRTVGAQLRSQPVSSADPLAYAALRAQVPTLVYQMSSTAFFTALVLNLTSLLFEDNAPKRQLALLSCAIKGAACHTDLLLVTGGATVLYDAYGSICIPQRYVQWLVTTPTMVYILSKISDFTPRQTATAIGLDVLMVLSGLVANFLRSPYLWVAFLTSTAAFIGVLYMMGLMVYSAVKEHTSANSRRSLLFIYMCTLFIWNLFPLAWILHVVHRGSPAAEYLNVFANFMAKVLFSSSIMYGNYMTIAQRRLLAQQDAENANRVQMIQDLRDSVTRKDQFMSLMSHELRTPLNGIIQLSDALVRGAGGEMNPKGQHFVRTIKNSSNHLLNIINDILDVAALKEGKLTIKHEVCSLAKAVDHVVDIVAPLAKKEVTMERWVDPATPLIIADFSRVIQ…
>CRv4_Au5.s18.g7954.t1
MSGSARQVTSTRKYHGKRKPRLESRRATLLHLCNLYPGQVEGPAMGDTYSEDLAFVGPLPPMPGREAEGPLLLWQLQVWHQSGSWKPGWFGGALAAAILLAAAAALLLCRMLVSRRRHAMLLEALLPRDLLKELSATHAETMGRAGPLDAAASPAGLLLELLGSLLAGSPPDLRQVVLLRSLVLRQADWYHPLGVAQAIKGAHLESDVARALMRQLGTGSGTDSVSSRPDFWKTDDEGVDVNDGDGGYDGVESDPMERRQRGSAAGGGRAGGGWQGAGGGGVGGVDSDAVDPAQQQQEQLGTLRGALAFVLSPAAQALPLPLAAASRAGPLHLGSNSDRAAAATGGAASSSTGRRRRRRSSLLGLQAGGGGSAGPGMTPLQQPSAPLMSAAAMQAISAA…
>CRv4_Au5.s18.g7992.t1
MHVRSAATAGNPVGASSDDDPNNAFIDKSLTVQGAAEGPLKGLTFAVKDLFDVAGHRTGFGNPVWLDTHPPATRTAPAVQALLDAGATLRGKTHMDELAYSLNGENVHYGTPRNPAAPGRIPGGSSSGSAVAAAAGDVPLALGSDTGGSVRVPAAYCGLFGIRPTWGRTNLEGARPLAPSFDTAGWFARDAATLRAAGSVLLDPASRAPGSPRLTRWLVARDAFGLADPPTEKAIYDAMSADFSKVVALLGEPTEVDVAAPLAGQGLGQYVDWMGVFRVCQGFEVWREHGAWVTEHNPAFGPGIKDRFIMASRITQEQVDAANVKRALIRSHLLTLLGSDGVLALPTTPGPAPLVNTPPAELDAWRTRLISLTSIAGLAGLPQVNLPIASVDGLPVGLG…
>CRv4_Au5.s18.g8000.t1
MAVNITNPVGALGKSGVSAPRLGYGCMSLSNNLYAGAPSEEDAIKLLHRAYELGVRLFNTSDLYGPYTNEQLLAKAFPADAYPDVVFATKWGAQFVPGQGIVNDNSRGNCRKCCEGALSRLQRPHLDLYTYRGPPSTAAGVSIADTMEECKLLLAEGKIRGVGLSEVSAEQVRQAAAVVPIAAVELEWSLFTRDAEDEIIPTCRELGIAILAYSPLSRGLLTGAVRSAEQIHEADFRRKGFPRLDNLDKNLVLVDRLSAIAGRKGCSPGQLALAWVMARGPDVFPIPGTRSIANLEQNMGALAVSLSPEECRELEEAVPADQVVGDRYAHMAATFHGAKGDAHH
>CRv4_Au5.s18.g8005.t1
MADAKLNVGFLGLGIMGEAMARNLMKSGLFASVTVWNRTLAKCQTLVSEGAKMAETPAAVVSSCDITFAMLADPDAALAAVFSDNGVLKGISAGKGYVDMSTVDEATSTKIGEAVTAAGGRFVEGPVSGSKKPAIDGQLIIMGAGDKELYEQCQPAFGVMGKKSFYLGATGAAARMKLVVNMVMGAMMGAFCEGMALADKSGLEQSALLEILGLGAMANPMFAMKGPAIMGRAYPPAFPLKHQQKDLRLALALGDALNQPLPVAAAANESFKTAKALGRGDEDFAAVYEATQK
>CRv4_Au5.s18.g8045.t1
MMLTKSAQAAFSGKVARPAKANRARLVCRAEEKSIAKVDRSKDQLYVGASQSSLAYLDGSLPGDFGFDPLGLLDPVNSGGFIEPKWLQYSEVIHARWAMLGAAGCIAPEVLGAAGLIPDATNIKWFESGVIPPAGSYNGYWADPYTIFFVEIVAMQFAELRRLQDFRYPGSMGQQYFLGLEAIFKGSGDAAYPGGPFFNLFNLGKTEAAMKELKLKEIKNGRLAMLAMLGYGAQAVMTGKGPFQNLVEHLADPVNNNILTNFGKLVA
>CRv4_Au5.s18.g8048.t1
MLAAKSIAGPRAFKASAVRAAPKAGRRTVVVMARKNEVSESYAKALVELADEKGKLEAVHADVDAVAGLMKENAKLSALIMNPVVESDKKRAVLAKIAKEAGFQQYTINWLNLLVEKDRLSLVPEICECFEDLYCQMTDTQVATLRSAVKLEQEQQFLIAKKLQELTGSKNIKLKPVIDSSLIAGFVVEYGSSQIDLSVRGQIERVADQLTKEMTAKLS
>CRv4_Au5.s18.g8079.t1
MAGPIKYPNMYPYGVKTLTPGQTVVEALDMLGPESSFRLEPLESSMYITPKAAMYNFRGKERRWDVVESHASVGVVLYHKDLDAWIIVRQFRPAVYATLMREAEAAGKPKPPYSEAFTYELCAGLIDKDKSNPEICKEEIMEECGFDVPLEGIHEIGVGIASAGTQGCPHIMYYAEVDSSMAVAGAGGGLLGHGECIEVLALPFESCQQFVLDGKLPKSPGLMFGITWAYFNKLNGSLGAPRVATTSGTGLQNGELVLQSVLPA
>CRv4_Au5.s19.g8082.t1
MLKRAVLLGAAAAGGAAAYYYTADIDTQMEMASATGPLVRMLDPELSHIIGIQAAARRLLPRDTRPDPPALHTKVFGLDFPNPIGLAAGFDKNAEAVAGLMGLGFGFVEVGSITPKPQPGNPTPRVFRIPELKATINRYGFNNLGADAVQDHLLAFEAAAEKDPALKRGPLGVNLGKNKNSKDAALDYCIGLTKLATHADYLVVNVSSPNTPGLRALQGRKELEALVNQVKGTRDRMVWGQSGPPPLLIKVAPDLNELDKRDIAAVALACGVDGLIISNTTIQRPGEVANYPAAQEAGGLSGPPLFAMSTGVLSDMYRLTGGRLPLVGCGGVASGEDAYKKIRAGASLVQLYTVFAYEGPALIPRIKRELAECLKRDGFTSVADAVGADHPDIRRHNSS…
>CRv4_Au5.s19.g8092.t1
MGVAVGDAGSEKKSKGRMAVDATAGAIAGCIARFLTGPFDVVKIRFQVQLEPIVGAPADALRRSKYTGFTQALTTIVREEGIQGLWRGTVPGLLLTVPYTAVQFVALQQVRQAAASYGLTANPGTAPLVSLASGALAGAAATVASYPFDLLRTTLAAQGEPKVYKTLWEAARGIVSQRGPAGLYSGLGVTLVEIMPYAALQFGLYDALNAAVNEARERHAREQAAAADAAADAEAAADRRGRQARTRSGGEAGEGRAVREVADEAAAAAERSASGLQSNRLQAFACGLVAGLVAKLVTHPLDVAKKRYQVAGLQRSLKYGARVEAGFAMRSLAQSLVDIYRTEGVLGLWKGSVPSIIKAAPSAAITFTAYDAVLAWLLVVAGEHSSKQAAAAQAAAAAA…
>CRv4_Au5.s19.g8104.t1
MQSLPRKQACVQTQRRSVGAVGRRAVVIRAQAAPSAPSSSVESISGVRQEVVDAIAKARHNCLTATHLPLPNRRQGKVRDTYDLGDTVVIVTTDRQSAFDRLLASVPFKGAVLNQTAAWWLGATAHIAPSALLSCPDPNVAVMKKCAVFPVEFVCRGFMTGSTDTSLWTHYKAGARSYCGNDFPDGMRKNDRLASNVITPTTKAEDHDVPISPAEIVAQGLMTQQEWDTVSSAALRIFEFGQAEAAKRGLLLVDTKYEFGKDANGVIHIIDEVHTPDSSRYWLADTYEARHAAGQEPQNIDKEFLRLWFRERCDPYKDAVLPEAPAELVCELSKRYVYLYEKITGQPFAVPDLDTPINDRILANLQKAGICK
>CRv4_Au5.s19.g8150.t1
MQSALAGGRAAGRGRVATRLPAPKRQSERVRVVAQSVSTLSTSQQLYSSVAVGKPEPLGPSRSGSGVNFALFSKHARSVRLCLFDGEAQPLGEVDCNRTGDVWHVELADLPLSGLRYGFKVAGDGGWDTGARWAPGRVLLDPYAPLVAGRRQFGVRDAVEQFKGKEGSQFLGAFDFSSAPYDWGAQEEAGRPRTALKDLVIYEVPVRCFTADGSSGLPAEERGTFRGMAAKASYLAGLGVNAVELLPVFEWDELEFRRTRNPRDHMTNVWGYSHINFFAPMSRLGSGGAGPEAAAREFKDMVKALHAQGIQVLLDVVYNHTAEADDKDPYTLCMRGVDNKTYYMIDPSQYVQLVNWSGCGNTVNANNPPVTQMIIDSLVHWVTEYHVDGFRFDLASCLC…
>CRv4_Au5.s20.g8200.t1
MHGSSQEALSPAASRTGIGTNNCSHLEHHQRGITASAPQASAATRELFAGFAAGAANVTSGYPFDTVKVRLQSAPPGAYRGALDCAVKVVRYEGLRRGLFRGLSSPLVGGTLETGVNYLVYSRVLAMLASSAPSAVAGGGAGGAAGPGVTPLSHVAVAGAVAGVALSFILGPTELVKCRMQVARSSARYPGGPFQVLQEAVAAEGWVRGLTRGLGATLAREVPGNAVFFTAYEAARQALRQTSDLQGATTRRADLQGALAAILCGGAAGTLMWALVLPIDVAKTRLQTASPGSPWDVGLMQQWAMLWREGGLRSLYAGLTPTLVRAFPANACQWLAWEAIMRGLG
>CRv4_Au5.s20.g8212.t1
MSSSLVSGKRVAVPSAAKPCAAVPLPRVAGRRTAARVVCEAAPSGAAPASPKAEAAAPVAAAPATPHAEVKKERAPATDEALTELKALLKRAQTAQAQYSTYTQEQVDEIFRAAAEAANAARIPLAKMAVEETRMGVAEDKVVKNHFASEFIYNKYKHTKTCGVIEHDPAGGIQKVAEPVGVIAGIVPTTNPTSTAIFKSLLSLKTRNALVLCPHPRAAKSTIAAARIVRDAAVAAGAPPNIISWVETPSLPVSQALMQATEINLILATGGPAMVRAAYSSGNPSLGVGAGNTPALIDETADVAMAVSSILLSKTFDNGVICASEQSVVVVAKAYDAVRTEFVRRGAYFLTEDDKVKVRAGVVVDGKLNPNIVGQSIPKLAALFGIKVPQGTKVLIGEV…
>CRv4_Au5.s2.g8272.t1
MDRSMLGTTMPQGMPGAAQRRLRGTSAGVRGRGASLVRRTIAGDRPQVATPPAPAVPTLCVPEDFVLAPGELSPVDRNGKNLPEDVFRCFGCTLPACKGAGGCASNLWRNQQDGYLRAILTARIQSPLEEARKLSEAVGNTILLKREDLQPVFSFKLRGAYNKMAKLPAEARARGVITSSAGNHAQGVALAASRMGCTAIICMPVNTPEIKVANVRKLGGQVVLVGESYQEAQAAAVARAVKEGLTFIPPYDDPYTIAGQGTIGDEIMRQISDPEKLDAIFVPVGGGGLIAGIAAYTKALKPDIKIFGVEPTGANAMAISLARGERVALSRVDAFADGVAVKQVGQETFRLCRELVDGIVLVDNSAVSAAIKDVFNETRSILEPAGALAVAGAKAWLKR…
>CRv4_Au5.s2.g8280.t1
MQSSLTRHSAASRASQPFQQGRAAPRSRACSVACRAAAGQDPLLLRVARGEDAERTPVWLMRQAGRYMAAFREYSDKYPFRMRSETPEIAIELSLQPLRAFRPDGIIFFSDILTPLPGMGIEFDMVKGKGPVIANPMRSTEHLKQLTPLSDPASRLPFINTILSTLRKEADSNGVTLLGFIGTPWTLAAYSMEGKADKDCKETKKIMFHNPALLHSFLDFLTEQLIVYAGYQIESGAQVIQLFDSWAHHLSPAQFTEFSLPYMERITVALKAKYPHVPVIMHANGGTGKLELMRESAADVIGLDWAVDMKDARQQLAGKRVQGNVDPMSLFGPEEVIRAEVERCLRAAGPRGHILNVGHGVVQGTPESSVALFCQLARESGAIHAKAAANGARQPVLV
>CRv4_Au5.s2.g8283.t1
MQHLFDGYACLSRVRLDGQDNRAWASQRFLDTDAYSAFRSTGRMKYREFQTPVPAEGPLGRAAAVLDNTMALMSKGRAFTDNASVSITSLPGGKLLALSETRSAAYLVDPDTLATLQQVEPADGLPGDLTTAHPKRTPDGRLVNFSRSLPFGGYHVYVQDPASLKRTQIAFIRDRDPLAPCWVHDMAVTRTHLVVVEAPVFINMQSLVLGEPRPYVFMDWRPEDGTRVHVIALDGSGVVTHTAPALFTFHFSNAFERPSASSPGATELCVDFSVYDDPAILNDLSLKEMMDMPGKDISPSRLRRLTMPLRDAAGKPAGPARLDAPAPLLRDESAYGNFVEFPAFNTKFAGLPYRYCYSTAAVRPTNMGNALAVHDLQEGTSRLWHSPGGMPAEPCFVPR…
>CRv4_Au5.s2.g8288.t1
MVAFGTAFGLNFITLLFERESAKFQLALLACYINFLAGFSDYMSWKGYAPIVRDSWGQGFQLLRTVMWLLTTPAMVYLLSIISDFSRLKVYSVMLADVLMITFGILAFLAYNKVMSILFYMVAWCLFAYVVHSMWSMFHASIAEARHDSSRVSLEVLRLFAVGLWFTFPVIWIVVKMGLVDIRTEEWTWCACDFLGKVMFSSSLLHGNFLTIEQRRLIAMRIVEEGNRIQVIQELKDLVEQKERFMSSMSHELRTPLNGIIGLSDALLVGSCGEINDQALKTITTIKTSGARLLNLINDILDAASMRKGKLTIKHEKVNLKRVVDDVIDLCQPLAKRGVKLVNDLRENVPFVLGDTGRIIQVFHNLIGNSCKFTHSGNISISAAVKDDEVEVAVADTGI…
>CRv4_Au5.s2.g8307.t1
MATPPQNTADPEKTQLQKLQNAEVTLLTMEKEEVVVYHNPLWRCLHFMGAFMLPGLGMFCEAYFVFAVGNLSAVWKAEYPDCWATHTTCPKKLSDSITYTQVCGIIFGQLVLGFFADRIGRKWGSVSTAATMVVGGILIVASAGPTDRALWAMFTAVQFIFGIGVGGEYPVASTSANERAESSVALSKRRGETVVLVFSMQGWGNLVNTAVIIAIMAGFNQYHPPYSSYALEVTWRLSYAIGLIPLISILLYRVFHLRESAVWQKKREALRAMGGAKASGVQWRKFSLLMRYYWHRNFGTAMSWFVWDFAFYGNKLFQSTFIKIINPHASVIQILEWTLLNSAVALVGYYFAAFTIDKPWMGRMRMQIMGFSWMFVLFLICAVHYDALSTPKWIHAFQF…
>CRv4_Au5.s2.g8330.t1
MNKSVGASRSAVLRRNAFKPIAVGMSRAPAVVSNAQPASAGIVEPLMVRAARGEKVERAPCWMMRQAGRYQKSYRELAKKHPSFRERSETTELIVEISLQPWNSFKPDGVILFSDILTPLPGIGVNFDIDDNKGPIIDTPIRTLEQVKQLHAMDFSKVDFVGRALTQLRSEVNNQAAVLGFVGSPWTLATYLIEGGSTSLYKTIKTMCFSAPEVLDALLSKLADAMAEYIKYQIRAGAQCVQIFDSWGGQLPPREWEKWSGPYLKRIIASVKAEYPTVPLTLYANGSGGLLERLATTGADVIGVDWTTDMADARRRIPSTQSVQGNVDPAILFASHDAIEDAVRDCLRKGGGQRHILNLGHGVLVGTPEEGVAHMFDLSKRLTYADVAQH
>CRv4_Au5.s2.g8341.t1
MGKGGTQHFEFFGPHGPAVLVLVLPAVCYALIIGCNKESCLKLWPEFKLPSLPQTVSFYSNEAMLVYLAWFFGVALLHVILPGQKAEGVVLPNGKRLTYKLNAFRIFLITYGAALYFGFVSRQLDLGWLYDNFAQLLTAAIIFSSALSVYLYASSFRKGALLSGHGATGYPAYDFWMGRELNPRLLGGAFDLKEFCELYPGMMGWALINLGMAHKQWAATGSLTTSMLLVNVFQLYYVVDALWCEKAILTTMDITTDGFGFMLAFGDLAWVPFTFTSCARYLVDYPQHLSVAATCLVLAVKLLGYAVFRGANSQKDMFRANPSDPRVAHLRTLKTERGTQLIISGWWGTARHINYFGDWIMGVAWCMPAGLQGLASVVPYFYCIYFASLLIHRERRDEH…
>CRv4_Au5.s2.g8347.t1
MALASGVGRRQHVSASPSRSRGVPSPRLSPVHANAPAVAERRTEPLLKQELVDYLKSGCRPRSAWRIGTEHEKLGFNLADNSRMNYDQIAQVLRKLEARFGWEPIMEEGRIIGVQLDGQSVTLEPGGQFELSGAPVETIHKTCAEVNSHLYQVKAICEELQTGFLGVGFDPKWAISDVPMMPKGRYKLMKSYMPTVGSMGLDMMFRTCTVQVNLDFESEQDMVEKFRIGLALQPIANALFASSPFKEGKPTGYLSTRGHVWTDVDASRTGNLPFVFEKDMCFESYVDYAMAVPMYFVYRNGQYINALGMSWKDFMAGKLPALPGEYPTIADWANHLTTIFPEVRLKKFLEMRGADGGPWRMLCALPALWVGLIYDPEAQRQALALIEDWTPAERDYLRT…
>CRv4_Au5.s2.g8352.t1
MEAPSTLRTYQYSKLNPAELKQVLARPRIDFTSILNTVSPIVENVRANGDAAVREYTAKFDRVNLDSVCVPIEDIPDPVLPAEVTHAFDVAYNNIRAFHTAQQSAPMEVETMPGVKCRRVTRPINAVGVYVPGGTAVLPSSALMLAVPAGIAGCGTIVLATPPRPDGTITPEVLYCAKKAGVTHILKAGGAQAVAAMAWGTASCPKVDKILGPGNQYVTAAKMLLQNSEAMVAIDMPAGPSEVLVIADAGASPVHVAADLLSQAEHGPDSQVVLVALPGVDLAAVSAEVDRQCNALPRNETARKALGHSYVVQVASRAEAIRFSNMYAPEHLIVNVEDAEDWLSELDNAGSVFLGRWTPESVGDYASGTNHVLPTYGYARMYSGVSLDSFTKKMTVQNL…
>CRv4_Au5.s2.g8398.t1
MPSCPRSVRASAFSGRVCSRAFQSLARPGRVHAVAPVSVAAPVELKTGKPKREDVITGSADNNVSDYIYEKMGADLHRQPDHPICIIKQAIYDFFEKRNPGMFKTFDDRYPIVTTHANFDEVLVPKDHISRSPNDTYYVDANTVLRCHTSAHQAETLRAGHPAFLVTGDVYRRDSIDSTHYPVFHQMEGVRVFTEAEWTAAGADATALAEKDLKDALEGLAKHLFGDVECRWIDAYFPFTNPSFELEIFFKGKWLEVLGCGVMEQVILDGNYKPGHKAWAFGLGLERLAMVLFDVPDIRLFWSGDDRFLKQFKAGDLSARFKPYSKYPSCYKDMAFWVSPEFSENNLCELVRNIGGDLVEEVTLIDNFTNKKTGRTSNCYRIVYRSMERSLTDEEINAI…
>CRv4_Au5.s2.g8400.t1
MDWHLQKLKHVVDSGDFNRAAVDVVFKEALKMEKVRPGSPESRVLEGYIMSTLFYEPSTRTRLSFESAMSRLGGTVLSTESAGEYSSAAKGETLEDTVRTVEGYADCIVIRHSQEGSAKRAAAVASVPILNAGDGPGQHPTQALLDLYTIQREIGRLENIKIGMVGDLANGRTVRSLCMCLSMYPGVEVFFVAPDVVRMRDDVKDYLTKRGVKWTEVSDLREVAGLVDVLYQTRIQRERFTDMDSYNAARGKYIIDKELMKILQPHAVVMHPLPRVDEITTDVDSDPRAAYFRQARNGLYVRMALLKLCLADKMTADDLNK
>CRv4_Au5.s2.g8409.t1
MQTMLKQRCQPAVGKQAKAVPAVAPKVGRARNVVVAQAAPAAAKAAAPSISRDEVEKCINAIRFLAIDAINKSKSGHPGMPMGCAPMGYVLWNEVMKYNPKNPDFFNRDRFVLSAGHGSMFQYSMMHLTGYDSVPLDQIKQFRQWNSLTPGHPENFVTPGVEVTTGPLGQGICNAVGLAVAEAHLAARFNKPDVKPIVDHYTYCILGDGCMMEGISNEACSLAGHWGLGKLIALYDDNKISIDGHTDISFTEDVAKRYEALGWHVIHVINGNTDVDGLRAAIAQAKAVKDKPTLIKVSTLIGYGSPNKADSHDVHGAPLGPDETAATRKNLNWPYGEFEVPQDVYDVFRGAIKRGAEEEANWHKACAEYKAKYPKEWAEFEALTSCKLPENWEAALPHF…
>CRv4_Au5.s2.g8432.t1
MEQSHSAPQPQQPQAQALAQQGARAASAAHALALASGPAPPGAAAAAAAGVVAAPLRTALLCIDVQSDFMPGGAVAVPRGEEVVAVINKLRRSCRDQLTLVVFTQDYHPPNHVSFASTHLPPPPPPQLAATAPQPPPSTDSVDQPPQPQPGARQYVRLVYDKATGELLDCSRCGPNCRARCAPGGANGSPSAAAVVTQAASPDNAGGRHGGGNGASRALLGAPEGIAARGGKPHGPSAPSATAFHALSAATSASPSRAGSLPFPALTLPVPVLVPPVVPVAAGEEGALLHAAEAALAALPHADEPAGGAAAPTESASPRAACRAAYAAAWQLESLAAAASEAASAAASAGVASASRADSGFVGVGAEEGALLAAAVGAVAQISAAGGDGDKGKGGGGAQ…
>CRv4_Au5.s2.g8436.t1
MSGQTQRGRPNVLITGTPGTGKTTTSEMVAQELGFRHINVGEWVREKNLHSGWNAEFDCFDIDEDKVVDALEDVMAEGGCVVDHHGCDFFPERWFDLVIVLQANNTELYDRLQKRGYTAKKISENVECEIMMVVMEEASESYRPEIVKPMSSDNTDDLERNVATIVEWVRGMMAAAAMAEHR
>CRv4_Au5.s2.g8449.t1
MAIRQRLAQPGTSGRVQARRPVRCVRLNVSAGGKVYIDPVKNECAAFAPATVANLGPGFDWMGCAVQGGGDTVVAKVIPGKPGVVEIAAIEGDGGRLSLDPAKNCIGVAATETLKLVGAVSCGVSLTLNKGLPLGSGMGSSAASAAAAAWAVNGLFGAPVPKDKLILAGLASEAAVSGYHADNVGPSLLGGFVLIRSCKPGEPVELLQLPFPNPERLHFVLVNPKFEAPTAQMRAVLPKETPMKSMINNCCQGGALVAGILTGDVKLVGESLDRDVIIEPVRAPLIPGMMAVKEAAKAAGAYGCTISGAGPTAVAIVDDPAVGARVAEAMSAAFRNAGKLDVNTAQVVKLDPEGAKFGLPLGSGMGSSAAAAAAWAVNALFGAPVPKDKLILAGLDSEA…
>CRv4_Au5.s2.g8453.t1
MAISARSSIKMQAARPARATTVVVRASAGRRELLGLGALALGLTMTLAPVANAGVVEDLQAKSAANKALNDKKRLATSYANLARSRTVYDGTCTFPENFFGCEELAFNKGVKFIAEDIKIECEGKTAKECGSKFTLRSN
>CRv4_Au5.s2.g8454.t1
MKVIIAGAGIGGLVLAVALLKQGFQVQVFERDLTAIRGEGKYRGPIQVQSNALAALEAIDPEVAAEVLREGCITGDRINGLCDGLTGEWYVKFDTFHPAVSKGLPVTRVISRLTLQQILAKAVERYGGPGTIQNGCNVTEFTERRNDTTGNNEVTVQLEDGRTFAADVLVGADGIWSKIRKQLIGETKANYSGYTCYTGISDFTPADIDIVGYRVFLGNGQYFVSSDVGNGKMQWYGFHKEPSGGTDPEGSRKARLLQIFGHWNDNVVDLIKATPEEDVLRRDIFDRPPIFTWSKGRVALLGDSAHAMQPNLGQGGCMAIEDAYELAIDLSRAVSDKAGNAAAVDVEGVLRSYQDSRILRVSAIHGMAGMAAFMASTYKCYLGEGWSKWVEGLRIPHPG…
>CRv4_Au5.s2.g8457.t1
MSGSQGSRGVTLLARFAASGVASATAEAGSSAATASGRGLLAGTRAGASSAGAGTSSRCSLPSRLLLLPSRLKSTAAAVAEEAAAAASSSAAASAASAASAYGGAALSAGLSDGARRALAAWLGVCAGWVYSMVVLGGITRLTRSGLSMTEWKLTGERPPVTQSDWEAEFTKYKASPEYKKIHRSMTLEEFKFIYWMEYAHRMWGRFLGLAFALPAAYFAARRWINGPLARRLGLLFFMGGTQGFVGWWMVRSGLEEPEHEWAQPRVSPYRLAAHLVSAFAIYATLTWTTLDLMYPRPATAGAPESLLRSTAGARGRLLPLAALIAVTATSGAFVAGMDAGHAYNTWPLMSGQLVPLQDYCDWERLGLSPLRNLFENTAAVQFNHRTLATVTLVSVLAA…
>CRv4_Au5.s2.g8458.t1
MAAVCVSSKAVAVRPATRVASRPAARMVVRASAKPAQISEKAIAAGVSAAAAASLALAPIAEAAVTPSLKNFLGSLIAGATVLGGIALAITAVSKFDKTIR
>CRv4_Au5.s2.g8460.t1
MKENVDMVAKNCKDRFSSADPHKVVALYDEFVALKSQADSLRAERNENSNAMKGKLEADKRAALIARGQELKDELAAVEERLGGVEAALQREGQRVPNLTHPQVPIGGEEHAAVLKEVGSPRAFTFPVKDHVALAEALDMVDFESAAEVVSRGFTPIMTPDLVKASVLEKCGFQPRGSGTQIYAVEDSPLCLTGTAEVPLGGVYMDRIVPEAELPVKMVAFGHCFRTEAGAAGMAGKGLYRVHQFSKVEMFVLATPAQSEALHQELIDIEADMFTELGLHFKVLDMPSGDLGAPAFRKYDVEAWMPGLQRYGEISSASNCTDYQSRRLNIRYRPGAVAKEAGSDSDGGAEAGKKGAGKKGGAGKKGGAGGSGGKTEFVHTLNATACAVPRMIVAILENF…
>CRv4_Au5.s2.g8491.t1
MVMHHEADKQFEEDATPWVQQVGLHPRAYYFHNFLTKAERAHLVRVAAPKLKRSTVVGGKGEGVVDDIRTSYGMFIRRLSDPVVTRIEKRISLWTHLPVEHQEDIQILRYAHGQTYGAHYDSGASSDHVGPKWRLATFLMYLSDVEEGGETAFPHNSVWADPSIPEQVGDKFSDCAKGHVAAKPKAGDAVLFYSFYPNNTMDPASMHTGCPVIKGVKWAAPVWMHDIPFRPEEISGMTQHNMDRDPDAGTCTDLHARCTEWAAAGECENNKAYMCGGSNNLGACRKSCKVCESCRSGDMECINRNRVRGGYWKLDKDELEWLGAGDLWKADMSPEL
>CRv4_Au5.s2.g8501.t1
MNLVEAALGPLDTKPLAPPSRPVVIVISGPSGVGKDAVLNRLKEQREDLYFVVTATSRPKRAGEVEGRDYFFVSKDKFEGWIADNMLLEYAVVYGEYKGIPRQQVDAALAAGTDVVLRIDVQGAATVKRLIPDCISIFVTADSEDVLVKRLVARKTEPLDKLLVRVKTARAENDHIKNFDYVVVNRDGELDACVAEVSGIIEAEKARVVRRHSSHHGGHNNHHQAQGQNQMAP
>CRv4_Au5.s2.g8507.t1
MDYGGALSAVGRELLFVTNPVVVNGSVLVPEDQCYCAGWIESRGTNGAQTASNVLQWLAAGFSILLLMFYAYQTWKSTCGWEEIYVCAIEMVKVILEFFFEFKNPSMLYLATGHRVQWLRYAEWLLTCPVILIHLSNLTGLSNDYSRRTMGLLVSDIGTIVWGATSAMATGYVKVIFFCLGLCYGANTFFHAAKAYIEGYHTVPKGRCRQVVTGMAWLFFVSWGMFPILFILGPEGFGVLSVYGSTVGHTIIDLMSKNCWGLLGHYLRVLIHEHILIHGDIRKTTKLNIGGTEIEVETLVEDEAEAGAVNKGTGKYASRESFLVMRDKMKEKGIDVRASLDNSKEVEQEQAARAAMMMMNGNGMGMGMGMNGMNGMGGMNGMAGGAKPGLELTPQLQPG…
>CRv4_Au5.s2.g8511.t1
MALQASTRSLQQRRAFSSAQTSKRVSVTKVRATAIEAENYVKQAPQSLVRPGIDTEDSMRARFEKVIRNAQDSICNAISEIDGKPFHQDAWTRPGGGGGISRVLQDGNVWEKAGVNVSVVYGTMPPEAYRAATGNAEKLKNKGDGGRVPFFAAGISSVMHPRNPHCPTMHFNYRYFETEEWNGIPGQWWFGGGTDITPSYVVPEDMKHFHGTYKAVCDRHDPAYYEKFRTWCDEYFLIKHRGERRGLGGIFFDDLNDRNPEDILKFSTDAVNNVVEAYCPIIKKHMNDPYTPEEKEWQQIRRGRYVEFNLVYDRGTTFGLKTGGRIESILMSMPQTASWLYDHQPKAGSPEAELLDACRNPRVWV
>CRv4_Au5.s2.g8520.t1
MHAISSRNLARRPAPAARRATAHRQVLVRAAGPKVAAEDLLATAKKAAQLGAEIVMAAADKPRNISRKEGTDIVTETDKASEEAVVAAIRAAFPNHAVLGEEGGVLGDVSSDYLWCVDPLDGTVNFAHGYQSFCVSVGVLRHATPVAGCVIEFLGGPKTWTTRTFTAARNQGAFVDGQQIFVSRVKELRDAVVTTEAVYYEDMWPQLTVLQKEFTERCRGVRMSGAAAANMCHLAMGCIDAYWQYNLKPWDVAAGAVILEEAGGRLTTADGLAYSVFDRSLIATNDALYEKVLALTEPQTSRMLQEGVSLSTWCVPKGYRVRSGAQMDR
>CRv4_Au5.s2.g8547.t1
MPVAWPEDIRDWSSIQYAVGWNFTPEVLAKMPGLRAIASLGAGVDHAMRPGLIPPGVEILRIVDPLMAQRMATWVMWAVVNFQRKMDLYARAQAERRWDKTIENLKPWDNGEVRVGIMGYGVMGQAAAGLLRAAGYDVAAWARSPHDSADIKVFSGRESLRSFVERTDVLVCLLPLTAETEGIISAQLLTWLPRGAGVVNAARGKHLDEAALLAAIDSGHVAGAVLDVFATEPLPADSPLWAHPKIRITPHVSSITDVPNAVAQITENYQRLVAGEPLLRVANKSVGY
>CRv4_Au5.s2.g8562.t1
MAALHARKGDVQALKVDAAAHLYGKKLNFTAAASVNDVISKGSNPFATNTILFSSGELQLSEPSAAATFLAGGRASLPLSVLKWVDWAEAVLRPATYLGGDALVAAEVELEAALTAGELNAAAAGLAEVFVFATLLPLGLRKKLPQQLDSFVGAVAAAPAVQSAVADVGCDDGAAVVGVWHDDAAAYTAARPKRPIPGRRNILITSALPYVNNVPHLGNIIGCVLSADVYARYCRARGHNCIYVCGTDEYGTATETKALEEGLTCQQICDKYHAIHAGIYQWFDIAFDRFGRTPTRAQTKIAQDIFKSLQSRGQLVQQEMQQLYSEAAGKFLADRFVTGTCPKCGYEDARGDQCDGCGNLLNPTELIRPKCKLTGTTPVMRSTRHVFLDLPQLSPQLQE…
>CRv4_Au5.s2.g8568.t1
MPRNLAGCGRHPPQPRYHAFAFYSAVRLGDPEMLARIMTVDPYFVTQDNGAGAPIHFAVTYRQLDMVHHLLNLGAHVNQRDPRGLTPLHRAAHLAHLDGYLELYEYLLSRGADPTITSDDFDPYLDPGPKTPAVMAPPDARVRAALAALESAYADVPKAPRAHPDLGDWWALYDYGPEVVAAWPHDYCHPYPEEEARRRAQAERRAEKLERRQLREAYLAALAAGGDGSEVVAAAEEKKKQQQAEKQQAAASAASAAAAAAGKAAGPSGSVPGPASAPATAASGGASTSAVAAPRPPPPAAVAAASAAVTPAVPKGRVAFVFPGQGSQAVGMLSAAASLPAVAAMLDTARAVLGYDLEELCRNGPQSALDDTRVAQPALFMAGLAAVELLRSRDPQLVA…
>CRv4_Au5.s2.g8575.t1
MLGQLFNKETQAIFFNYKEKPVQRMLDFDFVCGRETPSVAALVTPGSSGGFQKLFFGKNEIAIPVYGSIAEATRKHPKADVFINYASFRSAYESSLQALNSATLRVIAIIAEGVPEKDTKHLIAVARANNKVIIGPATVGGVQAGAFKIGDTAGTLDNIVACKLHRPGSVGFVSKSGGMSNEMYNVLARATDGLYEGIAIGGDAFPGSTLSDHCLRYEHIPAIKMIVVLGELGGADEYGLVEAIKAGAVTKPVVAWVSGTCAKLFKSEVQFGHAGARSGGDLESAQAKNAALRAAGATVPESFEGLEGAVKAVYDRVGAAGTLVPAAEVPAPAVPQDLAAAVAAGKVRVPTHIVSTICDDRGEEPTYYGVSMSELIEGDYGIGDVISLLWFKRKLPKYA…
>CRv4_Au5.s2.g8580.t1
MAALQSRVGRCVGASARRQHSLVASRVAVPRPSVSVVPQVQQEAHHVQGVAQIPSSRASCIARATYHGSVMAEPGSKYAVVVARFNSLITKGLLEGAMETFEAHGVPKENVDVAWVPGSFEMPVIAKSMAKSGKYAGVVCIGAVIRGATTHYDAVVSAATSGVLNCSVDTGVPVVFGVLTTDDLEQALDRTGGKVGNKGGEAALTAVETATLLAKLKKEGKASW
>CRv4_Au5.s2.g8605.t2
MSDESQELPVFTTAADMRAWVRKQKKSGRKVALVPTMGYLHDGHLSLVKAALERADVVVASIYVNPTQFAAHEDFDVYPRNPDDDRAMLKAAGAHAVFEPESLYVAVPGAGEGSNVVGRETQHPDSHETYVTVERLQKPLCGGSRPHFFRGVCTVVTKLFHICEPDVAVFGRKDYQQWRVISRMVRDLDFAVEVVGMPICREADGLAMSRHAKLEVKTGQPQRQRRVCGSCSSWPWPQRHLARQAGLHRQLGRLRDGGPASPAEPPETVTRHNFAAALPVIRAAIRDATFVAIDAEFTGLSPEGNGGEELLDDYEERYRRIANAASSFVIGQFGISAFKWVPPTSSSGSRGGGGGGVGHWEARTFNVYVFPRPLDGLGLDRRFMCQASSLTYLAEQGFD…
>CRv4_Au5.s2.g8620.t1
MQMMQRNVVGQRPVAGSRRSLVVANVAEVTRPAVSTNGKHRTGVPEGTPIVTPQDLPSRPRRNRRSESFRASVREVNVSPANFILPIFIHEESNQNVPIASMPGINRLAYGKNVIDYVAEARSYGVNQVVVFPKTPDHLKTQTAEEAFNKNGLSQRTIRLLKDSFPDLEVYTDVALDPYNSDGHDGIVSDAGVILNDETIEYLCRQAVSQAEAGADVVSPSDMMDGRVGAIRRALDREGFTNVSIMSYTAKYASAYYGPFRDALASAPKPGQAHRRIPPNKKTYQMDPANYREAIREAKADEAEGADIMMVKPGMPYLDVVRLLRETSPLPVAVYHVSGEYAMLKAAAERGWLNEKDAVLEAMTCFRRAGADLILTYYGIEASKWLAGEK
>CRv4_Au5.s2.g8623.t1
MAAESASPLQYQSGFGNEFSSEALPGALPQTQNNPKTCPYGLYAEQLSGTHFTAPRVLNRRSWLYRIRPSVTHEPFHPINFPNETLTADFTGGTVTPNQLRWRPFPVPSEPVDWVRGLFTLCGTGKAATKEGFAIHVYTCNQSMDTSALANADGDFLIVPQQGALRLKTELGLLDVAPGEIAVVPRGVRFSVVLRCAAARGYVLETFQGHFTLPDLGPIGSNGLASPRDFLHPVAWYEDVEGVSYQVLHKLEGHLFTAHQTFSPFNVVAWHGNYVPYKYDLARFCPVNAVAFDHPDPSIFTVLTVPGLVPGSPPTADFVIFPPRWLVAEHTFRPPYYHRNTASEFMGLIRGQYEAKQDGGFLPGGASLHLCMTPHGPDTATFERAAGEGAAAAAPDGPA…
>CRv4_Au5.s2.g8635.t1
MQPALVSHALHAAAMSAIGARGLLHALASTASRGACFGAAAGPSGLGASSCAATAPVSRAWTLAFSTSTAAASLGNKHGASAGAAASPGAGGAAVPGTGAAATAEGESGLHVSVEPLSGAHEGVSVISLSRPAARNAIGRQLLRELAEALDTVRQERTTRCVLVRSVVSGVFCAGADLKERAGMTQSEAAEFVSRIRRTFSELQDLPMPTVAVVEGLALGGGAELALACDIRVMGAGASIAFPEAQLGIIPGAGGTQRLPRIVGASRAKELIFTGRRVGGEEAQKLMLADHVVPDDQVYNRALQLAEQIVRSAPLSLRQAKAAVNRGLEVDLHTGLAMEEALYAQLLPTRDRQEGLKAFAEKRKPAYTGE
>CRv4_Au5.s2.g8646.t1
MDLPPELAVLADKVLSLSPVVLVALGSAVLILALAVGRVLFNLLPSKRPPVWEGLPFIGGLLKFTGGPWKLLENGYAKFGECFTVPVAHRRVTFLIGPEVSPHFFKAGDDEMSQSEVYDFNIPTFGRGVVFDVEQKVRTEQFRMFTEALTKNRLKSYVPHFNKEAEEYFAKWGETGVVDFKDEFSKLITLTAARTLLGREVREQLFDEVADLLHGLDEGMVPLSVFFPYAPIPVHFKRDRCRKDLAAIFAKIIRARRESGRREEDVLQQFIDARYQNVNGGRALTEEEITGLLIAVLFAGQHTSSITTSWTGIFMAANKEHYNKAAEEQQDIIRKFGNELSFETLSEMEVLHRNITEALRMHPPLLLVMRYAKKPFSVTTSTGKSYVIPKGDVVAASPN…
>CRv4_Au5.s2.g8651.t1
MLRKQIGGSGQQRAGLRRVNQGPARRRLAPCRVAAPVQTSSSVATFNGFVDYIHGLQKNILSTAEDLENGERKFVVDRWERDASNPNAGYGITCVLEDGKVLEKAAANISVVRGTLSAQRAVAMSSRGRSSIDPKGGQPYAAAAMSLVFHSAHPLIPTLRADVRLFQVGDEAWYGGGCDLTPNYLDVEDSQSFHRYWKDVCGKYKPGLYTELKEWCDRYFYIPARKEHRGIGGLFFDDMATAEAGCDVEAFVREVGDGILPCWLPIVARHRGQPFTEQQRQWQLLRRGRYIEFNLLYDRGIKFGLDGGRIESIMVSAPPLIAWKYNVVPQPGSPEEEMLKVLQQPREWA
>CRv4_Au5.s2.g8657.t1
MSVASAHQHAVVLILDYGSQYTQLITRRVRELSMFSVLFPGDASLDRIKGVNPRVVILSGGPNSVHVEGSPRVPDGFFEYCAEKNVPVLGVCYGMQMITHLLGGEVKPAVHGGEYGRMPMDIAPSSQLFDFLSSSTVNVWMSHGDEAVKLPAGFTAVAKSHQGAIVAIENSERRIYGFQFHPEVMHTEHGMEMIKHFLIGIAAVPADWNMGQVLEEQMAKIKAQVGPDDHVICALSGGVDSTVAATLVHKVLGDRLHCVFVDNGLLRYNEQQRVMDTFKNHLHLPVLCVDHSKPMLDRLRGLSDPEAKRKAIGAEFIEVFKNYANELEKTLGRKPKYLVQGTLYPDVIESCPPPGSGQKHSHTIKSHHNVGGLPKDLQFELVEPFRELFKDEVRAIGRL…
>CRv4_Au5.s2.g8669.t1
MASPLAQIAAQLAAPGKGLLASDESTGTIGKRLEKAGLPNTEDIRRSYRELYYTTPGMGQYISGVIMFKETLYQSTKAGRPFVEVLAEQGILAGIKVDEGLEPLAGAADGETHTKGLEGLEANCREYARAGAKFAKWRATLKVTDTLPSALAVERNADELAQYARICQNCGLVPVVEPEILIDGNHSQERFGQVTEQVIGATVAALWRHGVELEGCLLKPQMVIPGADAEGGKVSAADVARCTVAALRRVVPPAIPGIMFLSGGQTEEEATINLDAVNREAQAVGRCPWVLSFSFGRALQASVLKLWSSDQTRVAEAQQLALALARVNSEAALGNYNASSGSHPSTLGTATLHETFRGWNGQPAGNGAAQ
>CRv4_Au5.s2.g8679.t1
MAAHGLMQRAAGALTSARPSFCAGLGRVVRPSLVTKSPVAVSDSHGLNGATVATDGKPHSNGYSFHTSSPFIFGSPSAEDLDVFKREAAGHSARDDHSPVSFSTSASSSASSTHASGPASTSTSAPERPKHKYPRVLLKISGEALQGKNQGGIDPTVLNLVAEEIAEAHHAGLELAVVVGGGNFFRGCTAPKGMDRAQADYVGMLATVMNAILLQGALESLGVETRVQTAIEMREVAEPYIRRRAIRHLQERRVVIFGAGTGNPFFTTDTAAALRAAEMNADVFMKATKVDGVYDCDPMKNSHAKKYDKLSYRQVSLDGLEVMDETAITLCKENNIPVLVFNVMERGNVLRAAQGHSVGTVVEGF
>CRv4_Au5.s2.g8686.t1
MRYDVLVVGAGPAGLSAAIRLKTSSQAAGKDISVCVIEKGAEVGSHILSGNVLETKALDELIPEWKEDPDCPIKVKVTSDAFRVLASPTWSLRLPTPPTMHNKNKNYVVSLSEVTRWLAKRAEALGVEIYSGFAGKNLLYNWDGVVEGVATNDFGIAKSGQPKSNFAPGVDLRARVTLLAEGCRGSLSEEVISRFGLRQAAGAQHQTYALGIKEVWQVPEAQHKAGTVVHTVGFPASHNTYGGGFIYHMADQKVALGYVIGLDYDNPHINTFQEFQRWKQHPAVRKHIEGGTCLQYGARTLNEGGLQSIPKLSFPGGALVGCSAGFLNVPKIKGTHTAMMSGLAAGEAAFRQLTSDKAPAKGPVDMSTYEEALKRSWVWEELTAVRNIRPGFRAGLIPG…
>CRv4_Au5.s2.g8700.t1
MSTYSVLALAALVLLLSGNRAVDAVDAPGREEQPCARSCHTINCDNVGIRYGRFCGVGHGGCPGVKPCDPVDKCCQKHDLCVEKESVFSSKCHKRFLTCLEKHKEKDHEGFAPNTCPYSVVIPTMKAGIEMAMMFTGGLEEL
>CRv4_Au5.s2.g8702.t1
MALAAEAATIGRTIPVWRSKLLKSLAQNKRLANSRYVQLATVRPDNRPANRTVVFRGFLSDDDDSLTFVTDSRSRKVGEVAVNPAAEVAWYFPETREQYRVSGNLTIVDAASTDSAMQAARKRVWHNMSDPGRQQFAWPHPGLPRHLEDPTAWDCPAPGPKDPVLDTFCLVVLHVDEVEQLKLKSNERFLYRRQEAAAVPADEGAAAVTWVEEPINP
>CRv4_Au5.s2.g8740.t1
MAKQALLPLCALFLYAVVYKCSANASEAGTILIQGGTVVNHDQQFEGDVLIQDGLIAEVAPRIEPPPGARLLDARGCYVLPGGIDPHTHLDMPFMGTVTADDFYTGQAAALAGGTTYHIDFALPLLHDLLQGYRVWKVAADMATLVAEGINSFKFFMAYKGSLQINDEELIEGLNRCKELGALPMVHAENGDMVAWMQERLLAANVTGPEGHPLSRPPALEGEATGRAIRLAGVVGVPLYVVHVMSIDAMEEVARARQRGQRVIGEPVASGLALDESPVWDSNFTRAAAFVMSPPLRSAEHAPALRKALASGVLQLVATDHAVFNSSQKAGGRRDFRRIPNGVNGIEERMHVVWQEMVVAGLSTPSEYVRMTSTAAAQIFNIYPRKGRLAAGSDADVII…
>CRv4_Au5.s2.g8749.t1
MRFHGRHGVLQEETRLGQPFVVDASLQVDTLQAGATDDLADTVSYADVYKDIKGVVEGEPCKLLEAVAHRACAAVLAQHSGVREMRLAIRKLCIPGVPSVVESVGVEVYRHR
>CRv4_Au5.s2.g8757.t1
MQLQARMQLRSAGPRRAGPVPVRAMAGSRFADVAQAPPDPILGVSEAFKASTDPNKLNLGVGAYRDEQLKPVVLSVVKKAESKIFSRNENKEYLTIEGLDAFRKATVDLLLGGDHPAIKEGRVAVVQSLSGTGSLRVGAAFIARFMKGATVYLSNPTWGNHRNIFGDEGVEWKYYRYFDADTVGLDFRGMVQDLQAAPPGSVVVLHGCAHNPTGIDPTKDQWAAIADLCKERNLMPFFDVAYQGFATGDLDKDAYAPRLFVEKGLEIVVSQSYSKNLGLYGERVGALVMVLNDKEAATRCLSQLKRLARALYSNPPTHGARIAAEVVNDKELFEEWKGEMRGMAGRIERVRGELQRSLESKYPSKDWSFITKQIGMFSFTGLTPAQVDNMTNKHAIFMT…
>CRv4_Au5.s2.g8766.t1
MRRSLLLDVALCLFVVAFGPSSVQCQQAPLLPVLTQTWVVNETIVNFYNPANRTQRGGAVPKDAARYAILVNDTMPGPKLDVVVGQQVNITVLNRLSSDSVAIHWHGIRQTNTPWSDGADYVSICPADAIIGSTSYVFTFDEPGTYFWHSHIGMQMDQGLVGPIVVRDPNDPHMHWYDAEFPEPLMIQEWYWDPVGMLKAPHYHNFNTLEAALVNGRCASCLADASAPPSNTTTPGATGPNSYTYYPPVYSVQAGLCYRLRLINANGDFPGWQVALMGHNLTLIAMDARNLQPVQAGSLVTYGGNRADLVFCADQAAGDYALSFGSVQQRTPDCPWYPNGCRYQARVIIRYGGRDNATKSAVNRTQLAGLPYVEVLDPMRRTSDFVPLAPQPAPQPTRS…
>CRv4_Au5.s2.g8777.t1
MQTQLAQRQAAGLKAPLRFCYVVPAARSRRVTLCRAFAENGNGEAKKEKPHIHTRLAIIGGGPAAHTAAIYAGRAELEPILFEGWMAAGIAPGGQLTTTSFVENFPGFVEPIMGYELTDKFRAQSVRYGTKIYTETVTSIDLLVNSPAGHTALPPGLYGAGSSASSRSSMEDVAAPPPPVLEPLAGREHKPFVLHTPERVVTADAVIIATGASAKRLRFPGSGDEAEGGFWNRGISACAICDGSSPLIRNKPVAVIGGGDSAMEEALFLTKYASRVYVIHRFNYLEASKAMARRVLANPKIEVLWCTEVKEAHGNEQGNLGSITISRSLTPGGAVVSTGLVPGMNPVMAAPANDGKQPSVTLQQIEVNGLFFAIGHKPATEVFKGQVELDEYGYVVCAP…
>CRv4_Au5.s2.g8797.t1
MQSMLKQRSGVRAAQPARRAVQVRAVAAPVKAATSKSPIVTPETAKDLYYDMVLGREFEEMCAQMYYRGKMFGFVHLYSGQEAVSSGVIRQLRQDDYVVSTYRDHVHALSKGVSAREVMAELFGKKTGCCRGQGGSMHMFSAKAGVLGGYAFIGEGIPVGLGAAFQSKYRRDVLGDEKADSVTCSFFGDGTCNVGQFYESLNMAALYKLPHIFVVENNLWAIGMSHLRATASTAGDQDPHIYKKGPAFGMPGVLVDGMDVLKVHQVAKEAIERARRGEGPTLIEAETYRFRGHSLADPDELRSKEEKAKWLARDPIPQLKKYMIDNGLASEADIKALEDKVAEVVEDCVKFADESPKPERGQLLENVFADPRGFGIAEDGRYRYQMPGFSSGTAVVS
>CRv4_Au5.s2.g8820.t1
MVLSGLRRTPDAATHPSDCYEDIIDGLARRAIARAAATWPPQRVVVGVAGAPGSGKSTLATAVTQRINQLQSSESDTGGSSSSSSNSTSSSSIASSTSSSGSGSGGPFAVVLPMDGFHYYRRELDAMPDPREAHARRGAPWTFDAAKFVAAVRRVREAGAGSGAGGGGGGGAVRVPSFDHGVGDPVEDDIVIPPMPAAAIVLVEGNYVLLEEEPWRQLRDLFDESWFVDCPLDVAMDRVFRRQTAIGLKPEVSRVRIATNDRPNAELVAACAPAATLRVPSTVPFRGGGSGSGGE
>CRv4_Au5.s2.g8866.t1
MRRLQRAEEVTEGPYELKELQAPVLRGFGLTAFVNLFEGSVLHELHVPDDPLYRADVSPINPDTPEPEAEALPPPPPQPAAGTAPDAAAATAAAAICGAIKHALATGLLPHEQQLAASAPAPAPAVEGSAVAAAATAAAVAAAPADGPLPPRPFTGSATVVDYVRAYRSGATTPTEVAERIIAFVEAGGGASGPGGGRRAAAAAGAPHVGWFAPGGWRPEQIRKEAEESTHRLREGRARSLLEGVPFAVKDAADALPYPTTCGTTFVAAERTPTADAPCVAALRALGCVLLGKTSMHEIGLGITGLNVGSKATAINPFSPGLAAPAAAAAAGADGAKPASSPSGSSGSKHLHYTGGSSSGTAAVLAAGVCPIAIGGEDVALMYAAMCGAAQWADAGLPP…
>CRv4_Au5.s2.g8869.t1
MASLLSEWAANAQDLFANRLRPGHVEFAMLVYQPLAYWLVAGFYDILDTLKLPFTERYKVVRRDPGRPNTITRSQVIIRVLLQQAIQIALNLVLFVVDKDMCAVGPAGPQSLALRASRFVLGMYIMDTWQYWIHRWVHVNTFLYKHLHSVHHTLNIPYAYGALYNSILEGFLLDTLGGVVSLYGAGLDCETSTALFVFGYIKTVLDHCNYRGPINPLHSLFPNSAAYHDVHHDVRGIKMNFSQPFFTHWDWLLGTFMDPNGIHLTVEELKAQQEEKAKTQKDKKKQ
>CRv4_Au5.s2.g8877.t1
MLAAQQNLRCNASGRVSSSRNARRVLLVAATAAPAQAAHAANGAPVSSYTGKPARVATVKRKTKETEVEVTINLDGTGVCVAETPVGFLNHMLDQISSHGLFDLTVKATGDTWIDDHHTVEDIALALGGAMSQALGDRKGIHRFGEFSAPLDEALTHVVLDLSGRPHLSCDLNIPAQRIGTFDTELVEHFFMSFSNTSGTTLHIRQLAGKNSHHIVEATFKAFARALRKACEYDERRAGQIASSKGVLTQK
>CRv4_Au5.s2.g8904.t1
MQEPDRLPGIESAHRGGGTPPHFASLMTAGGSGNGDGLDYLSSPSGVIAEAQQLAAQAFGADRTWFLVNGCSAGIHAAVMAVAGPGAGRARRRRQQVQHPQDMDNTSGSADGQTTTSDAGGQGAEPASEKPGVLLVARNCHLSVFSALVLSGLEPVWLAPELDPRAGVAHCVTPGTVAAALAGAAAAGRRVAGVMVVSPTYFGAVADVRGIAQVCAGYDVPLLVDEAHGGHFAFLPPASLPPPPPSALSCGADMVMQSTHKVLGAMTQAAMLHLRGERVSAARTSRALQTLQSSSPSYLLMASLDAARQQAAAGGAFAEPCAAAQVIREAVSRCSLVQLLDNQTAQGASNSGSSTEVGGSSHAGTSSSTLHGHPGSSCNAESIAFFDPLRLTLLVDRIA…
>CRv4_Au5.s2.g8911.t1
MPIEGIELDDEKFVDLLGKLIGESKHLQNNPPEFVPKEDRAARHVLEVLQPLSQENGGPLRIRRISYVEGRGNIVVEYPGEHDGGIMSFVGCHMDVVTANPDTWTFDPFSLSIDGDKLRGRGTTDCLGHVALVTEFFRQLAERRPKLKRTIVGVYIANEENSKILGIGIDEMVARGELDNLKAGPLYWVDVADSQPCIGTGGIVAWSLKAKGKMFHSGLPHKSINPLELAMSSLAYMQQRFYADFPPHPEEERYGFATPSTMKPTQWSYPGGSINQIPGEATICGDCRITPFYDVQQVMDKLRSYADDLNSASSGALEALPTQGPCSKYVLPDEGLRGKVELTFFDSYAKGIACNLDTVGFNAMTSAFSKVYGYCKPYAITGSLPCIRELQEAGYDVQC…
>CRv4_Au5.s2.g8924.t1
MGEAQGSKQQGLGMQLLVTYSYMFIWIFLSAAVIMVNKYVLSMSGFPYPVALTCTHMGFCSILAFVLVKGGFVEAVNITADTYLSCILPIGLLFAGTLWLGNAAYLYLSVSFIQMLKASMPMVVFVVGVGFATEKFTTRVALNMVVVGTGIAIASYGEIHFVVVGVLLQVGSIATESVRLTLVQILLQKRGIKMNPVSTLYHIAPCCFVFLFLPFIYIELPKMVNDPNLNVNIPLLLLSAACAFALNMSVFLLIGKTSALTMNVAGVIKDWLLILLSVVLYGSPVTRTQLFGYGLAFLGVMYYNYAKVEQMKASAAAAAKAPEKQPLVESGDQGKSDNA
>CRv4_Au5.s2.g8928.t1
MLDNERREEPEGPVAELLHDSLGLPRLNAYLPPLPSIVALDSLLASAGFAVPSSALNGTSAAAAAANSSAYNGLLALFGVTGDMASAGMDGLTSRTVTAAQQLRAFLAQLPALSIPGGPAATGGGPAGAGAGAGAGAGAEVNATAAADEAAGLRPGQLMARRGYRAKHPVVIVPGFVTSGLELWRGLPCGQRYFRQRMWGTLAMVQAFLTDAACWFRHMELDTVSGLDPEGIKLRAALGLEAVDYFIQGYWVWGKLVEALADVGYDSNSLVSMPYDWRLAVPLLEERDGYYTRLRRTIEQLVELTGERVVVTSHSYGENVFRAFMHWVEAAAAEEEEGGKQPRSGGGSGHSGGGWVDRHIASTINIAGTSLGVPKSVSALLSGETRDTAQLGALAGFLT…
>CRv4_Au5.s2.g8946.t1
MAVQMSLFSRTRAPTCPGARRARPSAVRVQATLLPLPASETRSTVDRLKKLRLITAIKTPYLANGKFDLPAYDALVSHQIENGVEGLIVGGTTGEGHLMSWDEHVMLIAHTVNAFGDKTAVIGNTGSNSTREALHATEQGFAVGMHASLQINPYYGKTSKAGLLNHFNAVLNEGPAVVYNVPGRTGQDIPDDVVMEICQHSNFLGMKECTGNSRIKNYTSKGVNCWSGNDDESHDARHSNGAVGVISVTSNVIPGLMHKLMHGSPDPQLNADLKELMAWMFCEPNPISLNTALAMCGLARPVFRLPYVPLSRAQREKGAVLLNKVQEHIPGCKSVRVMEDHEFILVGRH
>CRv4_Au5.s2.g8949.t1
MNRSLQQLLPRAFSGALGKTLFAAATTQTSRGFATGVPFQTDATGHILPHGGELKNLFVKDAAKQQELIASCKHQQECSDRNACDVELLTVGGFSPLTGFMNVDVYDHVVKNMRLPGSGLIFGLPVVLDTNNEAVKEGDRVLLKYNGQDLGVLEVESKWVPNKAREVKECYRTSSLEHPGVQMVAQERGKFYIGGKLWGFELPKRVFPCATPAEVRALLPAKQDVVVFQCRNPVHRAHYELFTRALHAPNVRPGAVCLVHPTCGPTQDDDIPGIVRYHTYEVLKAELNNPNIKWAYLPYSMHMAGPREAIQHMLIRKNYGCTHFIVGRDMAGSKSCLSGEDFYGIYDAQNFAAEHAAELGMQTVPSADVVYTEEQGYVTADVAKKEGLHVKKLSGTKFR…
>CRv4_Au5.s2.g8952.t1
MADQSPAATAAEGVTSITHRTFARVGLFGNPSDQYYGRTIAFSLENFSAQVTLTPSADPSDTAIRILPHPLYDSTDYPSLEQLVTRTATEGLYGGVRLLLAACKRFGEHCKQHGIPLATKRGFSLSYDTDVPRQTGLSGSSAIIYSALKCLADWYGLSEAQLPAAVRPGWVLGVEAGELGIAAGLQDRVVQVYGGVVFMDFDPEHMAAHGGAGRYSRLDPELLPRPLYIMYSENPSESGKVHSGVKAKWLAGDPEVRALMTRVAACGDEGLQLLMASPRDDTRDTQLAQLMCANFDLRHALFGDDVLGARNLRMVELAKSVGAGVNFTGSGGAVVVFCKDGPQQAEALRAAAEAEGFTLVAAQVGPETAPLPPAAAPGS
>CRv4_Au5.s2.g8991.t1
MSVDIPHQPLSVSVGLIGPGLIGKALLRQIEQQAGKLLTPLHADKFNVVAVANSRQMLLRPEGINLATWEADLAEKGEPLDLDRYAACLASASGPLPASLPGPSCSVLVDCTASDAVSGRYADFMRQGLHIVTPNKKFGAGPLKQYHELRDLSERHRRRFMYEATVGAGLPIISTLHGLLETGDKIIKIEGILSGTLSYIFNTYKPGMKFSEVVADAKAKGYTEPDPRDDLSGLDVARKVVILARECGMEVELESMAVESLVPAQLQGEGVSAAQYMEALPQHDGAMASKAAEADAAGGVVRYVGCVDAENGNASVTLRTYPAGHPFAQLSGSDNIVVFTTERYKDRPLIVRGPGAGADVTAAGVFVDLLQVIRSHPRA
>CRv4_Au5.s2.g8992.t1
MLVGKQNARLAPHRSPIVLARVPSAKAGEAKAAPADAVALNELMEVAILAAEKGAEVVREALDRPRSISFKGATDLVTETDKASEDAVLAVLRKHYPRHALLGEEGGVSGDTDSSYLWCVDPLDGTTNFAHSYPAFAVSVGVVRGVTPVAGCVVEFTGGPHAWATRTFAAHTGRPTTCNGKPVRVSQVSDVRRSLLVTGFGYEHDEAWAANMELFKEFTDVCQGVRRLGAAAVDLCHLSMGVVDGYWEYRLKPWDMAAGIVIAQEAGATITTMDGRPFSVFERSMLASNTLLHQQIMDKTDPKTRGLLAANVDLSPWFVPPGYDTSRR
>CRv4_Au5.s2.g9006.t1
MALEAGELAVTVEFAKDLKDKDWFGKQDPYAVLKVGSQQFRTRTAVDGGKNPVWNETFRFNVINENDVELIIKDSDVSADDIIGTARVSLAKVREHGRDTQQCAVHSKSGKQHGFVQVNLTFTRNSSLKAGGHGGQPQPGAYPGYPQQAYGAYAQPQGIPGYGVPYGAPPPGAYGAPPPGAYPGYPPQPGYGAPAPGYPPQPGYPAPAPGYPPQQGYPGAPPPGQYPPTGAPGAAPPAYGAPPPGQYPPPQGAYPPPGGAGYPAYPPQQGYPGAPTYR
>CRv4_Au5.s2.g9015.t2
MDATRRRASTLALELASANGAGGFGGYGIGGGSAAASPHIGPGSPLFGAASSHALFRRGGGGGGDGGGAGAVQQAYVTRGPFSGGSLHGGSVFYGAGAGARGGAAGGATSSVRNSSSVHGGGAYLTTTGGSNVMTSGGGLLYAGASMAGNLLYTTSGAAAGPAYVTHAVRTSTHNCRAPSIGGNSISSAATTMAHHRAGAAGGGHMGGGLDGMLLQPPRPPGPATTVGRTTATTGGGRATAMRAGIITCNPALLEDGASLYGSGGGRAGGGGGADVGSAGGGGAAGLFGRSEAAVSLSTVTTKSHQFRPTRIAGPAMKAFHLAWAALLLTFVSSFAPAALSPIIAADLHLSKPVLAVAGAMSLLSSFVTRVLMGGWVRRYGPRYCQAVALLLTAPALAC…
>CRv4_Au5.s2.g9021.t1
MQIGFVSAESGQGRAKNVRNILLKNSVNIMLCAICWWAVGYAFAYGNSGGGFIGTSRFFSDGESFGSKPWFFTWTFCLSCVTIASGCLAERTHLFVYPVYTAVVSIAVHPVIAHWVWAPDSWLNSMTGSPCRFLDFAGGAVVHTVGGLTGLIGAMLCGPRLGRFEDGVGKDIPGHDVSSVSLGSLMLWFGWYGFNCGSTYIYMAQGGSEASAAVSRVALNMTLCASVAGMTSLVVSSIQTGTFDLAVCCNGLMAGLSASTSNVGFLTPWAACITGALAGLLYVGISRLLVRMGVDDPLDSSAIHCGSGILGVLVSGFLARPSYVMQMVGCNCGGVVYATNGGMQLGMQLLGLSCSMVWTAMWALLTFGILKKLQLLRVDQQTELAGIDNMEHGGPAYPE…
>CRv4_Au5.s2.g9042.t1
MAQPKAARNGGDCPATKRAGDGCFADAAGRNDEGTLHSNPSVLLLEDDPHAPEMPWGSGTDSYRKALRSALCVLALGVLGSTVLPVPYAFSKTGIGLGALTMGLVAVANDITCCMMIRAAAHVGCSTYEQLSEWAGGKKARVFTQVSLILLLYGTLCGGLAFLSDVARVMVQHGLGPGRAPALLESDGRPVMVLTVLTVLLPLCLQRHIRQFEKAATAGVVVVVVLCAIIVTRAVQLGFPAVASGELDVLAVKVDEHLPEAFAVLGFAFYMHPMLMPLLKEMPAGPAGMRLTEKAVHITLFGVACGVYGTVGIFGAAIFGASTESNIMVNDLLPGHPTATLALYASLLVYLCCGMVTTHYALRASLDLLVAGPDAPFTWTRRVAETCGILTAATTVALL…
>CRv4_Au5.s2.g9059.t1
MVGAAVAALLGSNRLTQQLRVAVLDVRPQSFTFTPRPYPDLRVSTITPGSISVLQRAGAWEQVAAHSAPFSSMQVWDASSPGHICWDARDTGAERMGVVSENILLQAALLAAAERAGGRTEFIWPAEVKALRLPSDGPGPGPAASASASGPAATSTASQGSAPHHGLAELHLADGRVLAARLVVAADGAGSRIRGMAGLRTWGWGYGQRGLVATVTTSEPSDTAWQRFLPTGPLALLPARDGFSNIVWSTTPEAAAALEAKNPRDFAAAVNQVLRAPPTGAPLPGASLLGPLASAVGAGLGAVVGRGGGGSSGGGAMRDPPLVLEWVGTSPKSFPLQLKQAGRYVLPRLALVGDAAHAVHPMAGQGVNLGFGDAAVLAEALAGAVEAGGDLGDGRLLAQ…
>CRv4_Au5.s2.g9066.t1
MAAGSVGVFATDEKIGSLLDQSITRHFLSTVTDQQGKICAEYVWIGGSMHDVRSKSRTLSTIPTKPEDLPHWNYDGSSTGQAPGHDSEVYLIPRSIFKDPFRGGDNILVMCDCYEPPKVNPDGTLAAPKPIPTNTRFACAEVMEKAKKEEPWFGIEQEYTLLNAITKWPLGWPKGGYPAPQGPYYCSAGAGVAIGRDVAEVHYRLCLAAGVNISGVNAEVLPSQWEYQVGPCEGITMGDHMWMSRYIMYRVCEMFNVEVSFDPKPIPGDWNGSGGHTNYSTKATRTAPDGWKVIQEHCAKLEARHAVHIAAYGEGNERRLTGKHETSSMSDFSWGVANRGCSIRVGRMVPVEKSGYYEDRRPASNLDAYVVTRLIVETTILL
>CRv4_Au5.s2.g9075.t1
MPFTARRLSVVVPNSDESYAQTHTLQAGSPAKSGEGKVTQPVERKGMIDTQPPRGTRDFPPEDMRLRNWLFGEFAAVSAAFGFEQFDAPVLESEELFVRKAGEEITDQLYNFEDKGGRRVALRPELTPSLARLVLQRGKQLPLPAKWFAIGQCWRYERMTRGRRREHYQWNMDIVGVPGVEAEAELLAAIVAFFERVGLTAADVGIKVSNRKVCGRGAG
>CRv4_Au5.s2.g9116.t1
MSRDGSDAAGAAGPSRATVNKRGGKSDAAPREASRTPAAIFVAVLIGAAAIFAAYMIQNMEDTGNVRGPGKYAAAIPALRAVAAQLLHPEKGILAADESPTTFGARLAGHPNKPTLRQTWRRILLTTPGLATHISGVILHEETFAQTADLQAARAAGVLLGIKLDNGTAPMGPKQAGELHTRGLGGLAGRCTTFHTKHGASFAKWRAVFRAGAHTPSKAAIRRNSKDLASYAAAAQKCGLVPIIEPEVLADGDHDLSRAANASARVLRGVFRALKKRGDVDVGAVLLKVAMVTPGSSSVMAATPEQVAQVTLRVLLGTVPRALPGVVFLSGGQSEELATTHMAALGRLAAERRAAGKPLPWALSFSFGRALQASAMKQWLAGDVPAAQQALLRRAAANA…
>CRv4_Au5.s2.g9125.t1
MRSSPHARRVGGAAPGAAAGAAPCLATAPFSPDDADAEQHSAGRWSRQALAGEPAGVAPPRFAASSEIQPASAEGGSAGDTGTAGSGLTVADTASAGRSHRRLAATAAAALLGNGGSPQQYNAQVARGGGAGGSGRYSAPPSPHMRAPVPGAAAVSGSHGGGISGRRGGLTTWMAGQLSAALAMTTSSPGPSPSALPHTAICSPRRLHAPLLPLSGGSSGSGSHAGGGSSCGPGGMAAVCGVVGPGRRRRRLLLTGVALLLVAVAATALLVQHPAAGGRGEQAAAAVQPAAAVRQAVAAASALPATTDKQAAAAALVAAAAEAAALLREREAALEGLLLSVGADDTVGRVAAVSSSGPMPALEGGAAGGAGAADGPGRQRQAQQQAQQQAQQQVQPQTT…
>CRv4_Au5.s2.g9136.t1
MRSQALSLARAGLLQLSSQTGASLEGGFALSKRAEQALIRASRAFASDAKALDELRKPKFTSKYLINHVSEKLIPAVKEWEKQYQPPVIHLGRVLSVGDGIARVYGLKSVQAGELVCFDSGVKGMALNLQADHVGVVVFGNDSLIHQGDLVYRTGQIVNVPVGPGTLGRVVDALGQPIDGKGPLTNVRSSLVEIKAPGIIARQSVREPLYTGVKAVDALVPIGRGQRELIIGDRQTGKTAVALDCILHQNYLNGLTNKKNRVYCVYVAIGQKRSTVANLVKLFAQTGALKYTIIVSATASDAAPLQFLAPYSGCAMAEYFRDTGKHAVIIYDDLSKQSVAYRQMSLLLRRPPGREAFPGDVFYLHSRLLERAAKLSAAMGGGSLTAFPVIETQAGDVSA…
>CRv4_Au5.s2.g9145.t1
MRLTGGGGLPSRRRTTSQSGAATVTYSLRSALLSPAALWAFIGATIVVLLFSFGVSLHGKDAPTAKVQPLRLRRLQGGGGLQSLLSSGRTVGAAEADTRFGSIYHDQLLGKFKLDQGRAGGLAQELVSTLKEMESPDGAALTGVLFSSPWSWFELEQGAIRFDYLDWVAEAACSNTGLKVAFLLDVVRAPAWVFAKWPDARAADSHGRKYELLSWFHEEARKQALQVVAEVTKHLVETHRDCVVAVQPVFNNEYEARYTQEHDCYQDYSAPALSAFRGWLRSRRPRIEDLNMRWGTTFASWEELTPPVLEAGSFPGVDMSPRYWDFLRWREQAGADVFNGACAAVQAAGALCFHHVPEFFTVLDAVYSGGSMLKHIASSPHTDFLIIDSGLRTPYGTVM…
>CRv4_Au5.s2.g9146.t1
MNGVKSVRKFKPNDTFGTIFHLELLMFYKAMEAPDVRQTDKLVATLKQMQATGIKTVVYSISWQWAEPEPGKVRTEYISWLLDAACKNTGLQVDLIVDLLNPPDWFWRQYPDARPLDSDGRNYTRMSWFHPQGNKAALTLLSSVATHLASNYPGCAKAIQPVYNNEYEAKYTQEYDSFQDYGPYALAEYRRWLQAKTQDVNVINLRWGKRYKTWDEVRPPALHSGDFQGVDFSADYWDFVRFREEFGAAHYNKACATVHAAGLMCFHHFPEFFTVIDAMYGATMFRLIASSPFTDFVIMDSNFMTPYGTVMNPHKLRVYISAAHAYGKPVYFEAAVERFKDFDLLASGFYNSMLAGADNIGITNWHTRVDMNASLTKAMHTAPTCGSCEVVGVFLHLQS…
>CRv4_Au5.s2.g9153.t1
MAVALPLLTTSALGILILCRKLTKRPLTDEQEAKLQKLIKRYKDQLVPSAERLAELEVEFQQQMKDGLAKQITVDGKHMMMLPTYIHRLPDGTETGECYALDLGGTNFRVMHVRLGAGRGQVESCQVREVALPREVYEGSGAQLFDFLAATLKDFIAQHSAADADKAVQPVLGFCFSFAVEQSGLAAGKLLDWTKGFKCSGVIGNDPVKLLTAALERAGCPCRVLALLNDTVGVLAAQRYLDHHTDVGVIIGTGTNACYVEDAAKLTKWRPPAGTGAGGRTAVNMEWGAFFSPKLPRCMEDLQVDASSPNPGKYLFEKLLSGMFLGETARTITAAIAKELPSLFAAAPEPAPPATAAGAAPAAAAPASPVLPAQMSTAGALSSKDLADIVDDKSWRLRD…
>CRv4_Au5.s2.g9182.t1
MVSGVEMGHSGSNGGLTNRQHQAGDGAGHKPAHDSAASLPPSEPGSMLDLTAPLEHATGLLRRVITEAFLLLRLAVRLWSYLGMGWKWFVQLMRLVLYAALLLPGFLQCGVWRQGGAWTIGYKAWGALLGRRLSEQGVLVACLDYRNFPQGDALDMLEDVNTGICWVLRRVHRLGGDPDNVTLVGQSAGGHLAGLSLLRQAEQAASGRSALGATPSWSPGCIKAFVGVSGAFDLVGLAEHLHRRGLYKNLLDRIMSLTTPADVSSTRGGKKVAVAGPHPPPSRTASGCSEGGAGGSYPADAAAVVTTTNSTSSSSCGMGSMIDKGAASGKAGGDSEPSAGSGAGEGSIAVHVGTRHDASGCKGGAEPAYDALSPLAAARRMGSDAAALLPGVLLVHGTA…
>CRv4_Au5.s2.g9183.t1
MDDDDPGQVVGPRWPPGAPDDLTVPIITSSEPVLGPRTREHATASQRWCRPFRAVWNALSAVVHVVVLVFKIIHIVLALAVYSMLLLPGFLRMIYYYFFNKCVVRGVLYGDKPRQRLDLYYPPSSRGAPATTEGATYPLVIYVTGGAWTIGYKAWGALLGRRLSEQGVLVACLDYRNFPQGDALDMLEDVNTGICWVLRRVHRLGGDPDNVTLVGQSAGGHLAGLSLLRQAEQAASGRSALGATPSWSPGCIKAFVGVSGAFDLVGLASHRGGTFRGLLDRILAVDASGMSSADGGGGGAARGVVQGIVTTAAVSASEVAAAATLSAEDRDAPPPGGPAVPPALPDIEQGGGGGSAAVSSAIIAQGSDKHGETPLLRSPVSSSAPGSLADGQAPAGAAA…
>CRv4_Au5.s2.g9195.t1
MGLANRTALAATIFHSELIDLFGLHKGGPEPVDQLLVTLRQLQAARIRTVMFSISWAWLEPAQGQLRWGYLEDVVGSACSHTELKVTLIVDLMRAPDWLFVLHPGAAVLDAGGRNYSHLSWFHSAANEVALGSLRQVVEGLSAKYEGCISGVQPVYNNEYEAKYTQEFDSYQDYNAAALASYRSLMRTRVGGDLGRLNARWETQFSSWEEVAPPKLHAGAVMGPDESASFWDWQQFRVHHGASVFNQACAVVQAAGVRCFHHFPEFFSVLDAVYGAAMFKHIAASPHTDFLIMDSNFRTSTGALMDPRKLRLYIAAAHAYGKPTYFEAAVERFADVKLLQAGYAHALLAGASNMGLTNWLGRINITDPQLAAAMHVEGGPEAAAAATAAAGAGSGVGCG…
>CRv4_Au5.s2.g9202.t1
MAAVIAKSSVSAAVARPARSSVRPMAALKPAVKAAPVAAPAQANQMMVWTPVNNKMFETFSYLPPLTDEQIAAQVDYIVANGWIPCLEFAEADKAYVSNESAIRFGSVSCLYYDNRYWTMWKLPMFGCRDPMQVLREIVACTKAFPDAYVRLVAFDNQKQVQIMGFLVQRPKTARDFQPANKRSV
>CRv4_Au5.s2.g9203.t1
MAAVIAKSSVSAAVARPARSSVRPMAALKPAVKAAPVAAPAQANQMMVWTPVNNKMFETFSYLPPLSDEQIAAQVDYIVANGWIPCLEFAESDKAYVSNESAIRFGSVSCLYYDNRYWTMWKLPMFGCRDPMQVLREIVACTKAFPDAYVRLVAFDNQKQVQIMGFLVQRPKSARDWQPANKRSV
>CRv4_Au5.s2.g9220.t1
MNCRELKQQARKDIKQALRGLTQEQMADESARIGAQVLDMRAYARAGTLGIYLHCAKLREVDTTAVLRDALHQGKRCYVPVVEDKNSNMKFLHLDDMACLRTVPPFDILEPTDTYDDGTPRQDALQSGTCFDVLLVPGLGFDTSGRRLGRGGGYYDKMITGLQRLAQAAGREPPLLVALSYSAQVVGAVPVDEHDQLVDVLVTAAGVYGCIARFMPDRMPAVSTVTFLAPPSLRHLLCNAAKASRDPGATTSCTCHLFPALPRDPAHGHIFTHRLQPALTPAAAALWSMGANTRPPPDPSAPLPTSLADDLRKSLFGYCRRAARAARITTDSATSWVNAAAAALRATVDPSAAASVDADMLLHPAPTPPPPPAFPLSAADVAAATATFRSVRRNLIITV…
>CRv4_Au5.s2.g9234.t1
MRLFAKVGEASKYLALVGICVLAFSIRLFSVVKYESVIHEFDPYFNYRVTQFLTKEGFYEMWNWFDDRTWYPLGRVIGGTVYPGLIFTAGSMYRILHFFNIPIHVQEVCVFTAPLFSAFCALACYGLVSQARGPGAGLLAALFVGMVPSYISRSVAGSYDNEGVAIFALVNVFYWFVKTVNTGSVKDSVLCVLAYGYMVLSWGGYSFIINLLPLYCLACVFFGRMTGRLYVAFAPLVAIGTAMSASIPVVGFNAVLMSEHFGAFFAFVVLHVALLVGYVRRMLSRKHFYVLTTLVLGGAVAAGAVVASAVAAYVGKSPTLGWTGRSMTLLDPTYASRFVPIIASVSEHQPPQWSSYIMDLHILVALAPAGILACFSRLTDATLFLVMYGLTAVYFSGVM…
>CRv4_Au5.s2.g9246.t1
MCDSPNARLAVLARQLCAGGPGGSTWEHVQQAPPDPIIGVNDSYRADTDPRKLNLGVGAYRTEEGKPYVLRAVREAEAALAADPAANKEYLPIAGLPEFNRLSRELALGPSHPAIRDGRVATVQALSGTGALRVGAEFLAQHLPPGQPRVVYLPNPTWGNHKTIFGRAGMQVREYRYFDAKTRGLDFAGMCADLSAAPPGAVLLLHACAHNPTGVDPSPEQWRQLLALTQERKLLPFFDSAYQGFASGDLDADAASVRLFASAPGPQEMVLAQSFAKNMGLYGERAGALSVVCKSKEVAGRVESQLKLVIRPMYSNPPMHGAAIAARVMADPRLNALWKEELAGMAHRIKAMRQALYGQLVARQLPGDWSFVLKQIGMFSYTGLSKAQCEVLTRKWHIH…
>CRv4_Au5.s2.g9247.t1
MAGRATTVGVIGGGSWGTALAIHCARRGHDTVVWARGAATVEAINSRHENTEYLKGHPCPPSLRASNDLAEVITRSELLLMVVPTQYIIHTLGEAAKLLQPHQILVSCSKGISLDSLETVAELLEERVVPPEFRPRLAYLSGPSFAAEVAAGLPTAVTVAAKDEELAARVQALLSTPRFRCYRSTDVVGVELGGALKNVLAIACGISDGMGFGNNSRAALITRGLYEITKLAVARGAHPLTMSGLAGMGDLVLTCTGACVCVWGGGDLSRNRTVGLRLGRGERLEDIQASMGGAVAEGVPTAVAIRRLASKMGVEVPIMEGIHAVIHLGANAQKVVTDVMSRELKAEVAPDIIRGVLASSSGSGSVHGSYASLPGAGAEASTAAAAAAPHGDSAVATSS…
>CRv4_Au5.s2.g9250.t1
MSFYRGTASHPWHDLHPGNDAPNFVSCVIEIPRGSKVKYELDKDTGLCFVDRILYSSVVYPHNYGFVPKTLCEDGDPLDVLVLMQEPVVPMCFLRAKPIGVMQMLDQGERDDKLIAVHADDPEYKGFTDISQLPPHRLAEIKRFFEDYKKNEHKEVVVDDFLGAEEAKKVVKDSLNMYQEHYVPRKLRNVYE
>CRv4_Au5.s2.g9254.t1
MLLFSGALRNWRKTRKGPDASASGSSVSEAHIKAVTVVKGAKTTRTTTAGGVGHAGAASNAPVPPPRREARASARSAKAPLKLHKVVELCATPSALAEGPASYEVVLSDGTDVSDPEEEGHKQQAHQQHQSHATANSKPRTDAAAPPPRRSRAPAPAAALSSTVLASVRRRTKQALPPAVASLAAIPPQRSVPAAAAAAAVAAGPGAVKAQAGQTRPRHGGNGWSEAVARLTSGAAARPVLTVLLLLAAGALMASGSQRLVTAFRQPVPRGSHRLGGSASPLTSFRPVAAAAAAAGSGSSPGRGARGAASASVWGTAAWIGGAMRLASSRSLAARAVPAPSTASATGSAPGMPGRNGGAALATRSGAGWWSAAAAVRGSGSGSSRSPVAAAAAAAADAA…
>CRv4_Au5.s2.g9288.t1
MQQQLRSTSIRAAAAAPGARPVPGLVRPAPCGPRRAPFTSPCFTPLPSAPFTRGPAPAGLMGMFSDPITARPPTNPDPSLINEDFSPTTQDKRTFDTTDYATFWITLVISITTYYLAASLVDLGMSWWQGILTVFFGNLITLLPMVLNAHPGTKYGVPFPVLARASFGIQGANLPSLSRAIVACGWFGIQTWIGGSSIFQMLMAVTGGAVAAAPIAWLGISLPELLCFLGFWAAQVWIVVRGMESIRILEKYSAPILIGLSLALMGWAVTTAGGFGPMLSTPSQFGVGMPKEGQFWSVFWPAVTANVGYWATLSLNIPDFTRYAKSQKDQVMGQAIGLPLFMALFTFLGLAVTSATVVIYGEAIIDPVQLLGRMEGLVPICISLFGLMWATLTTNIAAN…
>CRv4_Au5.s2.g9294.t1
MSSSCVGRPGLRGPRLRECARVHRGSRALRPICAASPPEGPKPSGPGPNLADPVGTIAWGGTLPSTRRAVLGGLSGLGIALGGNLGGCTSFLLGLDGGQLAGRLRADVLIPVRGIKRCVYGSGGSGFEFTYPASWLGDQTLAYRAAKRAEAARGGPPTFGSRRDDFDDSGFPALSPPRRPAPQQARGAEVAEPVVAFGPPGTTGEENVSVIVAPIMAGFSLDSLGGPRDAAERFLASLAPPSSGLEATLFSAEGRTDGSQLYYTLEYTVKGPRFYRHNVSVYTARENQLFTFNAQCPEARWQEDAAALLAAAASFRLT
>CRv4_Au5.s2.g9297.t1
MQLTRTQVSRSGVRPTRASRRVLVAKAAKTANGPRVAIVGITGAVGQEFLTVLTERNFPYSSMKMLASARSAGKKQEFEGVSYTIEELTENSFNDVDIALFSAGGSISKKLGPIAAKAGAIVVDNSSAFRMTEGVPLVIPEVNPEAMSHIKVGKGGAIIANPNCSTIIALMAVTPLDRVANVKRMCVSTYQAASGAGAAAMEELRQQTRDVLDGKPAQPKIFPQQYAFNLFSHNSGMDVALGYNEEEMKLVKETRKIWNNPGIRITATCVRVPVMRAHAESINLEFEKDISEAQALEALAAFPGVSIINDRQNNRFPTPLDATTKDNVFVGRVRRDISRDDNKGLDLFVCGDQIKKGAALNAVQIAELLL
>CRv4_Au5.s2.g9327.t1
MSSQLTWPSRSHGCGAVTTADIGSKVTICGWVDRNRDMGGVQFFDVRDHSGLLQVICEPQSVAPEVSRTASRLRNEYVVCVKGVLRARKDPNPKIPTGQLEVLAESVDILNVVTRSLPFPISEAEEQEPPKEDTRLKNRVLDLRRPKMAANLRLRHKLLRLIRTFLEDRHGFMEVETPILTRSTPEGARDYLVPSRVQPGEWYALPQSPQLFKQMLMVAGMDRYYQIARCFRDEDLRADRQPEFTQLDIEVSFMDDKALQSLMEELVLQVFDQILGVTLAAPFRRISYAEAMDKYGSDKPDLRYGLEFVDVSPAVAGCGFKVFAGAVADGGVVKAIRVPDGKRISNTRIKPKGDIANEAVAAGAAGLASIRVAADGSLDAAKAIKEGLSPEQAAQLMAA…
>CRv4_Au5.s2.g9351.t1
MGLQAPAKATPGQTLRGHGANGWKDAGWDYKQPKELSPQLRELLMHYGQLSQATYDNLGLNPCDAATWGYTTTKPGTSLIDYLTADYPLDPEARVTSKAPGTGDVYHLPLSDRLSPVIYAQAGGDDPDAAVAAVTAGAGSVAGVTAHSATMARSVKSPWGLLDGGVDGVFGFLAGIPTAIIGGARPLFKQNPATGRGTVPRPAFMGYVAISPSAGAGSGGEVDVAFVWRGTIFKEEWAANFGADQLVRWGDMSADGHALPWQVGVHRGFQDLYLRAAPQPDAKTMTGAPPEGAKSVAPREVVHNWIVELCRNHNVTTISTTGHSLGAALSTVSAFDIGEEVERLWAPANEKERAGWKTTAKPTVTAFAFAPPRVGNWNFVRTFRDKYNVRQLRICNVHD…
>CRv4_Au5.s2.g9395.t1
MAPCRDKDKVARMEQAVRVLIHGLGEDLEREGLRDTPKRVAKALLDCTQGYHQDTSSTLGTALFHEPIVHDGDEGVVLVRDIDFASTSEETLLPFHGRCHVAYRPKNGVVLGLSKLARLTKQYAKRLQTQERLAAEVAHALQQSLECYGIAVVLQARHLSNAAAPEQRTSACVSGVFATKGSSHLEELLSLLDLEGLAPAAVHNLDLCPRYGRPSAAACTIAASAPALAAASAAATSAPACNGTGCRLHHGHGHGPHGHGHHGHGHGHHTDVGVAAPGTPDPSEKDTDGDSDDLVLEAPCACDEMEGAMQQLIAELGENPTRPGLAGSARRYVMSLLASTSGYTQQPAVLGASMSVSAGASASAAATAGYGLEAAAGSGANVGAASARPAGCSRCCCAG…
>CRv4_Au5.s2.g9400.t1
MPSALVLVGPSGVGKGTLAKRLMDGAPERFGFSVSHTTRAPRPNEQHGVHYYYTTKEQFAKEIGEGKFLEYAEVHGNLYGTSVAAVRDVLESGRVCILDIDVQGARAMRKSGLKGIFVFIAPPSLEDLANRLAGRGTETVEQITRRLHNAKQEIESINEKGLYDYLLINDDLEEAMKRLTAIAGRAAVGLGPEPGMVPERVVLEDAPLPDIRALTEQQQQQAAASAGGAAPASQPAEAAPAQAAPAAPAPEASHAPEASAAPVAAPQANGVVVSAASAVAEQQGMEGVPPGFEKWQGKVALVTGASSGIGWATCEALALAGMRVVAVARRKDRLEELQRHMHAMGVPLVNFLPVVCDITKEAEVATLPKIVAKRWPECGVDVLINNAGMSRNDASLFEG…
>CRv4_Au5.s2.g9408.t1
MAAPDALIAAFIPASAVVAILFAVFLWKRVAAIQMTGGRVLSSQNGREYLLEEEQRGGEEEIVAKAADIQKSISEGASSFLATEYYYLGIFMVIMSVVICSLLSIVTPEEGRTSADELRNGVFSTIAFALGGATSILSGYLGMQIATFANARTAVEARKGIAPAFMCAFRSGAVMGFLLSGFGLLNLFLAITIFSKFFGDDWKGLFEAITGYGLGGSSIALFGRVGGGIYTKAADVGADLVGKVEKDIPEDDPRNPAVIADNVGDNVGDIAGMGADLFGSFAESTCAALVISAVSSLGKEHDYAGMMFPLLISATGIFVCLITTFLATDLKPAKVIAEIEHTLKMQLIISTLLMTPVALGVALWSLPPEFTLSVPSSSPDKPFDEKVVKSWYMFVCIST…
>CRv4_Au5.s2.g9414.t1
MANTVPIHDFSNVTELNEEQKRQLSELERAQGVASDAGYRIVAPQPTAKLLSGYTIPLVGLGTWKSAKGEVGAAVATALRAGYRHIDCARIYQNEHEVGEALAAVLAEGVVKREEVFITSKLWNTDHDPARVEAACRKSMEDLRVSYLDLYLMHWPVTGTPGPEVQPPLADTWAAMEQLVDKGLVRTIGVSNFSAKKLEALMARARIQPAVNQVEAHPYWRNEELRSWCAARGVHLTAYSPLGSPDSAAVIGRAADVPSPLKDETVAAVAAELGKSPAQVLIRWAVQRGTSVLPKSVNPQRIAANLEVLVGGWQLAPEQVARLDALPVQRRMVDGSFWVDARGPYRSTAELWDE
>CRv4_Au5.s2.g9429.t1
MRRRSPARTTSVATCQPAPSDGAPAAPPPLPSNDYLQSLEPAAASPASTAARDAQDVGRLVGVCVAVGGLALATELNKEWIGSHQELAMTAVFVAGYAGIIVEEGLGLSKAAVALILAAGLWSIRATAAGLEALDLEMASALGEVSAVIFFLLGAMTVVEVVDSHQGFKVITQSLRPASRTQLLLAVVGVTFVMSSVLDNLTTTIVMVALLNKLCPEPDTRRFLGAAVVVAANAGGAWTPIGDVTTTMLWIHGQISTAATMRDLVLPSALSVAVPVAAWALTAPEITSKEPLLLSSSPSSAPAASSSGQNAEAAAAGPGQGSSGSGSGSGSVPESGSGSGSGSGSGQEAAPPRSNLVLSVGLGSLLMVPVLRAWFLWLVTDAIHFGEGDRRSPAYIMFP…
>CRv4_Au5.s2.g9451.t1
MALRAAQSAKAGVRAARPNRATAVVCKAQKVGQAAAAAALATAMVAGSANALTFDEIQGLTYLQVKGSGIANTCPVLESGTTNLKELKAGSYKLENFCIEPTSFTVKEESQFKGGETEFVKTKLMTRLTYTLDAMSGSFKVGSDGSAELKEDDGIDYAATTVQLPGGERVAFLFTIKQFDGKGTLDNIKGDFLVPSYRGSSFLDPKGRGGSTGYDNAVALPARADAEELLKENVKITKALKGSAVFSVAKVDPVTGEIAGVFESIQPSDTDLGAKPPKDIKVTGLWYAQLK
>CRv4_Au5.s2.g9452.t1
MNVAMNLAQGLPRHCLKAVGTRSARLSRGLCTRVSASASAGEQFDFDLFTIGAGSGGVRGSRFASSYGAKVAVCELPFDYISSDTKGGVGGTCVLRGCVPKKLMVYASEYAEEFKASQGFGWTLPPGAATHSWTAFIEAKRKELQRLNGAYKNTLKNAKVELVEGRGRVVDAHTVEVDGKRYRAKNILIAVGGKPHKLDIPGAELCITSDEALELPACPQKVAVLGGGYIAVEFAGIFSRFGAEVHTVYRQPLPLRGFDEEVRKFAAEQYAAAGLHLHAGCNPVSVSKQPNGKLSLVVKGPDGATSTLTDLDQVMMATGRVPKTSGLGLEEAGVKMGSKGQVLVDEYCRTNVPSIWAVGDVIDRIQLTPVALMEGMAVAKSVAHNTPTVPDYFAVPSAV…
>CRv4_Au5.s2.g9456.t1
MTNSLLRGPSGSLASSASSPSTSGRYPAVITRARATPRGLGVSGPAALLACNVACSGRPAARRVASVVTRSIADGHDAERLKDCDVLQLETFLQAIRERNQGPSQAPGEVFLVGTGPGDPGLLTLRAAQLMATADVVLYDRLVSDEILQLVGPSARMVYVGKTAGYHTRRQEEIHELLLAFAEAGALVVRLKGGDPYVFGRGGEEVGYLAAHGIRVHCVPGITAAAGICAELGIPLTHRGVATSARFLTGHSREGGEEALDEAVALAADPHTTLIVYMGLSNLAKLASQLVGAGLDPATPAVAVERGTTPGRRVVYGSVAELHELAGRAGLRTPTLIMIGEVVALSHGWQGWAAAGRPLEWNEASSYPALKLSLQLDMGAVGGKVGAAGVEGEGKKRAR…
>CRv4_Au5.s2.g9503.t1
MMLSTKALAARPSRRALSVRASSVQGKNVFITGGNTGIGYETALTLAREGAKVTIAARDANKAANALAQIRAAVPSAAVDSLPLDLSDLVSVSDCAKRVADSGVAYDVWINNAGVMATPKMSTAQGFEYQLGVNHLGHFALTTAVLPALQAANKPVRVINVASAAHMFGKIDFDDLMRDRNYDAWEAYGQSKLANVMFTYEMARRVGPTSPITVNALHPGVVKTELGRYMIEDDKNKSNPIFPVAMELMKLFMLEPIEGAATSLYLASSPEAEGITGKYWVKSKRAVSSNDSYNRQVAQRLWEVSEELVETALAKARSAPAAAAPALEPATVSA
>CRv4_Au5.s2.g9504.t1
MERRPLPVAPSPSAKPELPARSALVCHAAAASVPLPNSDSAPQPNVLLAKIRAIMFFAWSFLLSLPLFVTMMVMAPLVLAFDKYRRLAQHFVNNLWACASTAPFYKVTIIGRENLPPPDKPVVYVANHQSFLDIYSLFHLQRPFKFISKTSNFLIPIIGWSMFLTGHVMINRVDRRSQLKCLQQCRDLLAEGAPVLFFPEGTRSLDCKMAGFKKGAFSVAAKAGVEVVPITLLGTGSLMPSGKESQLRPGQVTIVVHKALPPNKNADQLCDAARQAVASSLPPELVGSATEMAPDEQ
>CRv4_Au5.s2.g9516.t1
MPLVAKSDQSTNNQLFASYVLRSNDLVFTFTAPYSRKCASVSEGVPLRHYNIDHAYEFINSHGLAVRAVGLLVDDAKTAYEVSVAHGAKGVLPPVELRDEASGTSQVISEVIVYGDVVFRYVSGSFEGPFMAGYTPVTDSPVASIGLQRVDHAVGNTHDLIKAVEYITGFCGFHEFSEFVAEDVGTVDSGLNSMVLANNEETILMPVNEPTFGTPRKSQIQTYLEQNEGPGLQHLALLSNDIFTTLREMRARSELGGFEFMPRANAKYYKDMYARIGDSLTPQQYREVEELGILVDKDDQGVLLQIFTKPLGDRPTVFIEIIQRVGCMREVKEPATGAVVGTEQAAGCGGFGKGNFGALFKSIEDYERTLNV
>CRv4_Au5.s2.g9517.t1
MGAGGAGTGDREGGIKLVGYKNFVRQNPLSDKFTVHKFHHIDFWCGDATNTSKRFSYGLGMPLVAKSDQSTNNQLFASYVLRSNDLVFTFTAPYSRKCASVSEGVPLRHYNIDHAYEFINSHGLAVRAVGLLVDDAKTAYEVSVAHGAKGVLPPVELRDEASGTSQVISEVLLYGEVVLRYVSGSFQGPFLAGYTPVTDSAVTSFGLQRLDHAVGNTHDLIKAVEYITGFTGFHEFSEFVAEDVGTVDSGLNSMVLASNNEAVLLPVNEPTFGTPRKSQIQTYLEQNEGPGLQHLALLSNDIFTTLREMRARSELGGFEFMPRANAKYYKDMYARIGDSLTPQQYREVEELGILVDKDDQGVLLQIFTKPLGDRPTVFIEIIQRVGCMREVKEPATGAV…
>CRv4_Au5.s2.g9589.t1
MASSAPRLVRLGALLARQGAPATSLLSAQGQAVRAFSEKAAAEAPAAAAAAASKDEAKSKIRGFQALLFGGLGAGFLYGYSLFTSKVPESGPLAGPPALVTSKPSTPGDYAAVRQSIAALLDDGDYDDGSYGPVLVRLAWHASGTYAKKDGSGGSNGATMRFAPECEWGANAGLAVARKLLEPVKAAHPWISYADLWTLAGVVAIEEMGGPTIPWRAGRSDAPDGSKIVPDGRLPDAKQGAKHLREVFGRMGFDDKDIVALSGAHTLGRCHTDRSGFSGPWTNAPTTFSNLYFQELLNNKWVVKKWDGPLQYEDTKSQSLMMLPSDLALLSDRSFKKYVTQYAKDEEAFFKDFAVAFSKLLELGVPFPAKSA
>CRv4_Au5.s2.g9591.t1
MAWPSELKEMHNHHMESTRWKELKWRNDDIVICSYAKAGTTLTQQLVGQLISGGDPTFRTADASPWLDMRVIPKEPMMAALEAQTQRRFIKSHLPTDCLPYNPNTKYIYLVRDGRDMCWSLYNHHSTANAMWYSVLNDTPGRVGPPITRPHPDPRQYFLDWLEQDGGPHWWPFFSHVASWWAVRQLPNVMLVHFSALRADLPGEARRIANFLDIAVPDDKWPTILEHCSMDWMRAHAELAVPGGGVFWEHGASDFIYKGTNGRWKDSLTEEDCRVYEERAIKELGPDCAEWLKTAQPHDSKHFK
>CRv4_Au5.s2.g9603.t1
MSRTQLLRRLLPGVPGTPGLFSQSCTAVPNGLQQCGFFSSHEEEQKQQSSLQPASSSLVQFANIVNRPMPVPLATAAGFAASPLMAMPARRGAGVMGVRRPALPMLPGMGPTTTPSAALARSYYTEGEIFGTTFMYTTNMMFWAGIVGAVAFRRNLIILLLSAETVMLACNMNFLFTAAYLNDITGAIMSITITTIAACETAIGLALCVAYFHMRSATDVEALNMLK
>CRv4_Au5.s2.g9626.t1
MALLSSRSSANCTGRSVRRATVAPAPVVKPHSSVAMRFTNNTKQDAAVPAPCDMQFVLDSKFTRESGLQPRVVFRNLTTPQLYEMALAHEPGTHITSSGALATLSGEKTGRSPKDKRVVRDPETEKDLWWGPYSPNYVMDDRTFLTNRERAIDYLNTLDRVYVVDAFVNWDPESRLKVRVVTSRAYHALFMSNMLIKPTEEELKTFGEPDFVIYNAGAFPANKYTQFMTSQTSIDLSLKHKEMVILGTMYAGEMKKGVFTLMHYLMPMQGKLSLHSGCNVGADDDVTMFFGLSGTGKTTLSADPKRPLIGDDEHVWSDKGVFNIEGGCYAKCIGLKATTEPEIWNAIKFGTVLENVDYNPVTREVDYESERLTENTRASYPIEFMNNARIPCVGPHPKN…
>CRv4_Au5.s2.g9642.t1
MRAALCSAKPVTVAGAPQLTRNARPPVSACPPRAPRLAVSSSRSPAAAMSAQSPAEQPWELWYWPGMKGRGEYVRLVFEEAGVPYKDMGQSAGLAGIVEWVWKGGNTGFPVRAPPAVRRGDFTLSGTPVLMAYLGRQFGLMPTDPEEAAHVEQLLAVVTDGVGEGRLAFHPKDFYASHKTQVEESAPYIEQYGKQRLPKYMSYWEEVLTKNPHQSGFLVGKDISVADLAVYQYMAAAQQHYRRWYDDVEAPAAKAHQARIAARPRLAAYLASPRCPPWDSDSMM
>CRv4_Au5.s2.g9657.t1
MLHATQQRAVAGRRPFSGARASNRVVAHAAATVATSLPTVDVQFHQPKLAGVTNEQQFKAVIKGLVAQGKFPPQLEPAWDYFYDNYKKAVTSSGVAGADEKLVTQVQASILDNVLNQAVNPYTFPSFHTRLIEPYNYYDFGQRYVATLIDFQNSVLGFRERFDRVQELLDQKHNVVILANHQTEADPGVFAHMLAKTHPKLATDVIYVAGDRVVTDPMCKPFSMGRNLFCVHSKKHMDDAPELKAAKMETNRKTLVAMQRKLNEGGTLMWIAPSGGRDRPNANDEWVPDNFDPAAVELMRNLVQRAKQPGHLMPMSMFSYPMMPPPKTVDKSIGERRLTAFTGVGISLCEELDVAAIIAASGSEEKEVQQKALAKAAHDAVKESYAVLSKAIQDPAFRA…
>CRv4_Au5.s2.g9662.t1
MSDTKPRLYGVGVKALRLQAVAAVAGVELDVAPFTEGLTNATPNYLRLAPDGAFPLLVTPAGAGLTAAGPSLKALLGASAAAAKWAEWAAGCDCFLHGWVDGLLGLAPVEAGQAGAALGGLRTHLAALEAALAGSGFATLGAGAGADAAVAFSLFPFYLTVFDDKLRGEFPKTSAFLAAVFASPAVQAALHGTPVAPPAAALTAPAAASPLEPFAAVLTQPWSGSRTRAAFNEFFETKGHTYWASSSVVPHNDPTLLFTNAGMNQFKPVFLGTVDPNSDMGKMKRACNSQKCIRAGGKHNDLDDVGKDVYHHTFFEMLGNWSFGDYFKEEAISWAWELLTKVYKLPAERLYATYFRGDPAMGLPADDEAREIWLRFLPESRVLPYGNKENFWEMGDQGP…
>CRv4_Au5.s2.g9693.t1
MPPEYWTDYMWLVICGALASFAMAWGIGANDVANSFATSVGAKTISLRQACIIAGIFEFAGALGLGGEVARTIAGSIARPAAFQDMPEMFAYGMLCALISASTWLYIATYLSLAVSTTHSIIGAVLGFALVWGGSGAVVWNDRKKEFPYSTGLVPVICSWFVSPITAGIAAGVLYFFNRLIVLRRQNSTTLAIWVFPLLVFLTVFINLFFVIYKGASKVAGWTSHKAAWVSAVVAAGLFVLACFPGTWILRRQVTKDMDEAAQKAADAEANAGKEKEGVEDAEPTSKAMKIFNSIKKAATRGLDVDIHANVETDRAVHDLHAAAEVFSPETEQVYKYLQVFSACAVSFAHGANDVANAVGPFAGIYHVYRFWNVASNGETPIWVLAMGGAGIVVGLATY…
>CRv4_Au5.s2.g9694.t1
MAAGIGANDVANAFGTSVGAKTITLKQACLIASVFEFAGAIGLGGEVTKTIAGSIARPAAFQDLPEMFAYGMMCALIAASTWVFVATYFCLAVSTTHSVIGAVMGFALVWGGSGAVVWNDHMDAFPYSKGLVPVICSWFVSPIMSGITAAILFSLNRVCILRRENSTQLAIYFYPLLVGVTVFINVFFVIYKGAKNVAHWDSNKAAWVAACIMAGCMVLAIFPGMWLLRRAVTKDMDRAAQKAADAEANAGKPKEEEVEAEPTSKAMKIFNSMKKAATRGLNVDIHEHVEHDQTIHDMHAAAEVFSPETEQVYKYLQVFSACAVSFAHGANDVANAVGPFSGIWYVYRFWTISSSGDTPVWVMAMGGAGIVVGLATYGYNIMMTLGVGLAKMTPSRGFC…
>CRv4_Au5.s2.g9695.t1
MWLVIVGFIVSFIMAAGIGANDVANAFGTSVGAKTITLKQACLIASVFEFAGAIGLGGEVTKTIAGSIARPTAFQDLPEMFAYGMMCALISASTWVFTATYFSLAVSTTHSVIGAVMGFALVWGGSGAVVWNDHMDAFPYSKGLVPVICSWFVSPLMSGIASAIIFWLNRVCILRRENSTNLAIYMYPLLVGVTVFINVFFVIYKGAKNVAHWDSNKAAWVAACITAGCMLLAIFPGMWLLRRAVTKDMDRAAQKAADAEANAGKPKEEEVEAEPTSKAMKIFNSMKKAATRGLNVDIHEHVEHDQTIHDMHAAAEVFSPETEQVYKYLQVFSACAVSFAHGANDVANAVGPFSGIWYVYRFWTITSNGDTPIWVMAMGGAGIVVGLATYGYNIMMTLG…
>CRv4_Au5.s2.g9696.t1
MSDIALLHGLGVQLIVVAGVNQQIDDMLQERNLTPKYVGGYRITDREAMRIAIEAAGQIRTTCEQFLSKGPAIPMFRRHTKGDREIHFEPALRVISGNYITAKRRGVLDGVDFGLTGEVRFVLKDDIRRQLDSGNIVFLSNIGFTASGEVLNCNTYDVGLHAAAELGADKLFFLHLDEVAALSLPQWLPLSEAQNMLMEKLQNSISAQQMDALRATMDATPAEPVSAYGVATSLSPAQLKTYQAMKREDLVVDLDIWSAQGFPTAVSTCVVACCKGVKRAHLLDARIDGGLLLELYSRDGVGTMISADFYEGIRKALPNDLDGLAALLEPLEKAGILVKRSRDELADLLPSFTVIERDNRILGAALLLDLGQTPDGVPVAEVGAFCVDPIYRGSGRGDS…
>CRv4_Au5.s2.g9701.t1
MLQSGAAQRGVSRTSSLARKVAPARIAGARRRTSAVVVHANYKPNAVQLFSPSKINLFLRVVRRREDGYHDLASLFHVIDLGDYMEFETTPHALQDTLECSDPTIPTDESNLVIKALNLYRRKTLQTMYYKVKLHKRVPHGAGLGGGSGNAATTLFAANKLMGGIASNEDLLEWSGEIGSDISVFFSNTGAAYCTGRGEVVEDVPPPVPLDTPMLLVKPPVGLATPKIFKSLDLDRRSSADPRGLLDTIAAAKGVDQAAAVNDLEQPAFDNLPELAALKQRLIESGQFRSVFMTGSGSTIVCFGSDAVPAFLREEPQYKDLFISPTRLITRKPNGWYEHSGMWKEQL
>CRv4_Au5.s2.g9704.t1
MHESHSVLPAYKQLGGTQERLDFFRLITRELGLSVNEVNTAVRSWDSAVARGAASIATSTPSQPQAAPSPLQWDAAYRAADRLASAATPLYSQLFVPISQAPDGMKFLVDMRADLMDVVAAATVAAPASAPAAAPNPEAEASTADGSSTSSSTHRGVGTAVAPSSTGAAGEAQEAGGHTAGAVAAAVGAAAPPAALTVSLEESAHLRAMAEQLRQLLAEWFSVGLLHLQHISWEESPAALLERVMRAEAVHPLGGSWEELRRRLGPRRRVFAFTHPCMPGEPLVVLHTALMNRPAACIDDILSHHDRAGEPPAACSPTPAAASSSAASGPTTAVFYSISSSQPGLKGIELGHFLIQRVAERLTAEHPSLRQLVTLSPLPNFRSWLTSQLQQQLMLPQAA…
>CRv4_Au5.s2.g9718.t1
MTKPNVVPLAVAAAFGAGLAICSKYVLKLHKKKALRVLITGAAGQIGYALAPQVAVGSMLGADQPIILHLLDVEPAKNALEGLRMELVDGAYPLLEGVLTFTDVAAACKDVDVAVMVGGYPRKAGEERKDVMAKNVSIYQQQASALEANASKDVKVVVVANPANTNALILAENAPSIPRENITCLTRLDHNRALGQVAERTGSHVGIVKNVIIWGNHSSTQYPDVNHGTVGGKPIRSAVNDDTWLNGDFITTVQQRGAAIIKARGLSSALSAANAVCNHVRDWVRGTPGGSWTSMGVVSDGSYGVQRGLVYSYPVTCAGGKWKVVQGLPIDGPSRERLRVTEAELVEERDLALQCLAEKK
>CRv4_Au5.s2.g9723.t1
MATEVRLGPRTPCIVSAVRTPLGAFQGALSSYTAPELGSIAIRGALERAGVRPEDVDEVLLGNVISANLGQAPATQASLGAGLPPSTPCTLVNKVCSSGLKAVMLAATAIMAGTADVVVAGGFESMSNAPHYMPAARRGLRLGDGAVVDGLVKDGLWDPYSNIHMGSCAELCADRYAISRQMQDEHALQSHQRAVAAAAAGHTLAEIVPVPRPGTIAMGAGARAPSPISSAAPANIGTPGGAASPTASTSSTGSGGAAAAAGGTPPSLAGTVAAAMAAAAAAAAGPSASGANQFIWEDEGLAKMDPARLPGLKPYFRRDGGGSVTAGNSSPMTDGAAALVVASYDAVQRLGLPLLAVVRGFADAQQSPEWFTTAPAAVVPRALRRAGVEAAEVDYWEVN…
>CRv4_Au5.s2.g9754.t1
MLQLRCAAQNYDWGRKYQDSEVAKLAHANGNEVDESKPFAELWMGAHPNGPSKVAATGESLASLLAAHPAALLGARVAEHFGQLPYLFKVLSVSKALSIQSHPDKQLAERLHAEHPKMYADPNHKPEMALALSDFEALCGFSTTAELQARLAATPELAGLVGAEQVAALAALPAGAAGQDHPAAKQALKSAFTHLMTAPPAAVTEAVRSLVARLEAAQAAGAALSEHEALALRLNAQFPDDVGIFSAFFLNIVRLPAGSAIYLPANEPHAYLAGELVECMAASDNVIRAGLTPKFKHADVLCESLTYRQGLPDVLEGSPAGPGGSVRVYQPPFEEFELQKLEVSGGEVALAASQGPRILLVTAGEAEVAAGGGGLPAALEAVKEVERGGVLRRGSIVLL…
>CRv4_Au5.s2.g9759.t1
MATNHVFFEPPKSLLSILEEDKDLSVPALTKLGCTLGPQSRTVEVLEDLLRAGMTVARFDFSWGSMEYHQETLDNLRIAMRNTKRLCCTMLDTMGPEIIVLNRPEAPISLTAGQTLTLTCNKSVAASETVLPISYPSLAGTGLAPGSQVFVGQYLFTGSETSSVYLTVQEVKGDEAVCTCNNTCILEGLALTVHIAHMRNEAPILADSDMSAIRQWGAANKIDYVCLSFTRNAADIGVVRAVLDSCGLEQTRVMAKIENLEGLVHAGDIVEAADSVLLSRGNLGICLDAEKMFLAQKKLLRACNLAGKPVMVTRVVDTMTDAPRPTRAEATDVANLVLDGADGILLGSETFRGKYAVSTVKTVCAICKQAELCFDNQSYYRSLMEYFGCYTLHPNLGKR…
>CRv4_Au5.s22.g9800.t1
MALSMKMRANARVVSGRRVAAVAPRVVPFSSASSSVLRSGFAAEVSVDIRRVGRSRIVVEAVKKSVGDLHKADLEGKRVFVRADLNVPLDKATLAITDDTRIRAAVPTLKYLLDNGAKVLLTSHLGRPKGGPEDKYRLTPVVARLSELLGKPVTKVDDCIGPEVEKAVGAMKNGELLLLENVRFYKEEEKNEPEFAKKLAANADLYVNDAFGTAHRAHASTEGVTKFLKPSVAGFLLQKELDYLDGAVSNPKRPFVAIVGGSKVSSKITVIEALMEKCDKIIIGGGMIFTFYKARGLKVGSSLVEDDKIELAKKLEEMAKAKGVQLLLPTDVVVADKFDANANTQTVPITAIPDGWMGLDIGPDSVKTFNDALADAKTVVWNGPMGVFEFPKFANGTVS…
>CRv4_Au5.s22.g9803.t1
MSLSGYFSRLLEASGKKSVGSFFASWEFGKMLVDGNLAHNVLVRATGAGRLVGTDYNGNRYYENEEAAYGRRRWIVYKDKFDYNPTTIPPEWHGWLNYINDYNPTNTQFKQPTYQIEASMTKTGTQTCYNPKGSWFSAKPRNWRKYESWTPANKSA
>CRv4_Au5.s22.g9816.t1
MLVINKVAIYKLPCPIFVLCCQLFCSAAIVAGANHVGLLQAEVTEWAKLKKFIWVVVGFLGTIFANIKVLQHANVETFITFRSSTPLILSVCDYLFLGRMLPSARSWGALLVLLGGSLGYVMSDSDFRVDAYVWLFLWYCFFTFDTVYVKHMCDTVKMTNWSRVYYTNAIALVPLALSLPILGEHKKLERVQWTPDVVGPLVLSCVVGLCMSHSAYLLRDTVSATLFTIVGILCKIITVVINVLIWDKHATPTGIMFLLVCVLAGTFYEQSPKRSQSNSNSQQQQG
>CRv4_Au5.s22.g9817.t1
MSDAKATAGSEPEAEPLTKRLSKASRKIHNVSNSLVNARLIALFSDKDLYAKALGCFYYVFVALEAALDEALKKGDADVSKFKDVLKGGLYRAPGFKQDVQHYLGATWQAQLGTKSQALKDYEAHLASLGRSSPALLLAHVYTQHLAMASGGQIVKRWARKIFQLPDDVGTAAFDYTGESNNTLRSAFKKQFDEWGAAQPQELQDQLLSEHLAAFGHNNAIIKAFPLPATAIIAGAIRVTPRPVLLVLVALLGWCLAFIIPWLQTKLQVGV
>CRv4_Au5.s22.g9840.t1
MQLGQRVRPFSGASAARKPARASVTVRASGAKRDPKQRIVITGIGICSVHGNDPDTFYQKLLNGESGVGLIDRFDASEFPTRFAAQIRNFDDENLIDKKNARRYDDCLKYTMVSGKKALIMAGLEKERCSEGYKKVDPTRVGVLVGTGMGGLTVFQDGVSNLVQKGYKKISPFFIPYAITNMGGALLAIDQGFMGPNYSISTACATANYAFVAAANHIRNGDADVMVAGGSEAPIIPVGLGGFVACRALSTRNDDPVKASRPWDCDRDGFVMGEGAGVLVMESLEHATKRGAKIYAEYLGGAVTCDAHHMTDPRSDGLGVSTCIELALKDSRIPKEQVNYINCHATSTLVGDIAEVKAIKKVFTDTKHLKVNGTKSMIGHCLGAAAGVEAIATLKAIET…
>CRv4_Au5.s22.g9847.t1
MPTASTVKIAGASALAAAMLAAVSRPRAVGRLVRGIVTRAAGGPVYTPLPPPQKVKVALCQLHVTADKEQNLRTARKAIEDAAAAGAKLVVLPEMFNCPYSNDSFPTYAEDIEGGASGSVAALSAAAAAARVTLVAGSIPERCQGKLYNTCCVFDSSGKLLAKHRKVHLFDIDIPGKITFKESLTLSPGPGPTVVDTEAGRLGIGICYDIRFPELAQIYAARGCQVLIYPGAFNMTTGPVHWELLAKARAVDNQVFVLTCSPARNPDSSYQAWGHSTALGPFAEVLATTEHSPATVFAELDYAQLDERRAAMPLRQQKRHDLYLLLDKTA
>CRv4_Au5.s23.g9850.t1
MYERSITDSDDFWAEQAEALHWNKGWSAPLCQSNINVENGPVHISWFVGAETNMAYNCLDRHIEAGHGDRVAIFWEGNDEGEERVLTYSELKSMVCRIANYLKSLGVKRGSDVTMYMSLVPELPAAMLACARIGAVHSVVFGGFSAEALSGRILDSQPNVVITSSGTMRGPKPIGLKAIVDDALDICEKHGHTVQHVLMLEQLPLAEVGGSMKPGRDVTWREAVDSQSDECPVEWLPAEAPLFKLYTSGSTGKPKGVLHTTAGYMLGALVTTKYVFDVQPATDVYWCTADCGWITGHTYVAYGPLLLGATQVLFEGVPTWPDAGRCWSIVDKYKVTIVYTAPTAIRALHAKGDAYVTRYSRASLRLLGSVGEPINPEAWRWYHQVVGDGRCPIMDTWWQ…
>CRv4_Au5.s23.g9855.t1
MAHRPVLAQAKAAATVAPVAGAASSGVSQAELRERVTFFNTMSKSKELFRPRLSDGSVSMYVCGVTVYDYSHIGHARVYVAFDVLYRFLSAACGYKVTYVRNFTDIDDKIIARAQQARSGVETSELTERFIDEFNKDMAALNVLPPALEPRATAFVPQMISTITDIIANGHAYAVDGGDVFFDVASLPGYGRLSGRQQEDNRAGERVAVDSRKRSPADFALWKAAKPGEPAWPSPWGPGRPGWHIECSSMIRELMGPVIDIHGGGRDLVFPHHENELAQSQAACGCGQHGHEHGHEHGGQQGGASTSGGDGSQSQLHNGTDFVRYWLHNGFVNVDSEKMSKSLGNFFTIRDVLARYHPLALRWFLVSSQYRAPLNYSDKGLEDASGRLYYVAQARLDVV…
>CRv4_Au5.s23.g9860.t1
MATPCVRASPSAGALRSGRAARAALRPVAVAVPRKRLAAPLSSAATASAVTATEQAVGEVAIANGVHILTADTYHGFLEKNAEKLVVTDFYAVWCGPCKVIAPEIERLANEMDASQVVFAKMDCGATNESKKLAMALNIKALPTFHLYRNSKQIDSMTGAKIKALTDLIGKHL
>CRv4_Au5.s23.g9861.t1
MASSGDVALAFGLVIAAGLCTCLGAAIAFCVKVSDTRILAAALGVSAGVMLYVSFVEIFTTKSIKGFMDAGYSDKSAYRYATLLFFGGMAVTWCLNQLAHGLLHLAAASQAARKRRAGGGGGGGGGTCGGCCPAGLWLRGGGWGWRGAAAGVDVGKQDDDTTPPSRQQSALPAAPCSQHLTAPAIATADARVGTDACSTSSSTHGPSCMAPAPSDAPVTVLGLTAPAPADVEAGSAGTGITLAGPAGTDLEREVVAVLVAADDPRDHSHAHGHTHSSHLHRRSHGLPMCVCGSSSSHGAVAAAATPPSDLTRDPEASAGSPPGGGGAASETLTSSHNQLTHLGLLSGLAVGIHNFPEGLATFVGTLADPTAGVAIAVAIALHNIPEGIVVAMPIYFATG…
>CRv4_Au5.s23.g9893.t1
MKLCKERIIDARRAAQSCPVAHVVSGRVAQRVAFGRTATQQQQRAAHVAVRVAEASPAKPAGDVYRVETRPLEEGVEKHIISIFVADEPGLINRVAGVFARRGANIESLAVGLTVDKALFTVVVAGKANVVANLVKQLGKLVKVRYVEDITSTNRIEREMLLLKLRVPAGSTRAEVLELAAVFRARVVDVGDETLSLCVTGDPGKLTAMIKVMSKFGIEQLTRTGRICLRRGEALLERSAGIPEQIAVPLPEAAKVKAASSNGAPKAAAAGEERGADVYVVDDADLKGVWDVDNVLSPTYSASGAGALPADFKPYTLSIEVQDVPGVLNQVTMVFSRRGYNVQSLAVGPSEREGLSRIVMVVPGKVSSPDGSSGISPLLKQLSKLVFVQSIDDLTDIPF…
>CRv4_Au5.s23.g9903.t1
MQTKSFSPQQQQRRGVCGNAHAPRLSLRHAPRSSRCAPCRVAAPEAPTTVSASTLNTSFVQDKQQYEALYKRSIEDPAGFWAEIAEQFHWETKWERDHMRYNFDVRAGPISVEWFRGATTNIAYNCLDRHVLAGRGDQTCFIWEGNDVGREKSMTYAEALDEVCKLANWLRAAGVKKGDAVAVYMPMLLELPLAMLACARIGAVHSVVFGGFSAESLAQRMEDCKAKVLLTASGVMRGPKSIDLKKIADKACKLSAEAGHTVEHVLVYENDNAVPAADCPFTPGRDRWWQSEVAAQPTTCAPEWVEAEHPLFLLYTSGSTGKPKGVLHSTGGYMVYAATTMRHVFGLQQGDVYWCTADCGWITGHSYLAYGPLLNGTTQIVFEGVPTHPTPARCWEVVA…
>CRv4_Au5.s26.g9990.t1
MRPRARPTAAVSVRAEISYIMIKPDGVQRGLVGDIISRFERKGYKLTALKLYQTPKEVAEEHYKDLASKPFYKDLVNYIVSGPVVCMVWEGKGVVATARKMIGATNPLASEPGTIRGDFAIEVGRNVIHGSDSPENGERETAIWFPEGITSWSQTMEPWLKE
>CRv4_Au5.s26.g9996.t1
MADYAMPEYLWLVVVGSMAAFAFGWGTGSNDVANAFGTSVGAKTLTLKQAVVIAIIFEFVGALVLGRVSTSTIAGGIANINVFLAEPEVYSYGMVIALTVGFVWQALASYWELNVSATHSIIGAIIGFSFVFGGANAVNWATPDPASFPPYKGVVPIVLAWFVSPVLTGLASCTIFLIVRTLVLRRENSYVLSFWVLPVMVLLTSWINIYFVFTKGAKKTLASNSDWTDHKAAWVAACCAAGLAFLTIVIVLPLLKWKADKKFRLDEEKAAGGADEEAAKAKTKAEEEAASENNSKFLKAMTSLKRAAMHGMEVDIHEVVEEDPIVAAIHKNAEVFDPKAEYAFSYLQVFSAICVIFAHGAGEVGYMAGPLATIWFTVKDGTLYSKVQAPIWIIIISAL…
>CRv4_Au5.s26.g9997.t1
MADFAMPEYLWLVVVGSMAAFAFGWGTGSNDVANAFGTSVGAKTLTLKQAVIIAIIFEFVGALVLGRVSTSTIAGGIANINVFLAEPEVYSYGMIIALTVGFVWQALASYWELNVSATHSIIGAIIGFSFVFGGANAVNWATPDSASFPPYKGVVPIVLAWFVSPVLTGLCSCILFLIVRTLVLRRENSYVLSFWVLPVMVMITTWINIYFVFTKGAKKTLSSSDDWTDAKAAWIAACCAAGLAFLTIVLVLPLLKWKADKKFRMDEEKAAGGADEEAAKAKAKAEDEAASETNSKFLKAMTSLKRAAMHGLEVDVHEVVEEDPIVAAIHKNAEVFDPKAEYAFSYLQVFSAICVIFAHGAGEVGYMAGPLATIWFTVKDGTLYSKVQAPIWIIIISAL…
>CRv4_Au5.s27.g10015.t1
MVFVQQSGMGILDELAKRRHGLIEDAKVAAQLTVSRCFEVARSTIRAVLLLPPREAPAAYTGLARHEEAEAPEGPIGSGAPTPGADGTSTLGTPAAQRTPRAPLQRSKSAHVNIAELAYKPEAPSDALSVIRSAGYPHELHMVTTSDGYVLRLERIPRPGARDTVFFMHGVLDTSMAWVSGGVTGSQAFAAWEAGLDVWLGNSRGNAPRQHSDPACRGGRYWRYNINHMGMYDISAQLDHIHNIKCAELGAGSVTLDLDHLGPLAGSFLGGGAGAGLAGSGDSGTPSAVGNAGARGVSGSGLLPDRSVSAAEQPQRYRTPCSAAAPTVRLGGVRSGMRMRNSNSDGNLCRWGSTASGVSAVSAVSAASSGAACGDGLDNGAASGRADRQASVLQQSQLP…
>CRv4_Au5.s27.g10026.t1
MILVLAAITICWPAGRVSGQTPQTCWVSVAENVTGLTGIEYTRPARATEAGGGELVLLSLRQSLVAYSVAQGRVAWRFAWQPLTEVMADGDVFSYPIRQDGACPLALDESAGLVYLGAGDRVLYALELATGRQRWSWRSSQAFESVVCGGGRVLASTEDYRQVGLDGASGQLVWQLQFRRLSSPQTGVFEGVLVRPEQSGSLWGINSTSGQVMWLKAPLRRVPIVNFFDAMPYDPDTGLFFVSDDAGWLYALQLRTGAVAWEADVASQQSSKRLSNVAAANGRVFALSSVKPPGEPGPSAHAVAFNASTGAVLWEQSGLGSCGPGGMQVLPQRGAVLLGLTSSWGGATWPIQYTAADEATGATLWTLPMGGRFCASTPQYLPGSDLLLLAALSEDRRSL…
>CRv4_Au5.s27.g10030.t1
MAEPLSILSPVKAHFSHDENDSSTDHNNNNKDTTDSNTGKGSPIKTGAAPPKVKLFQLPSQDKVALRDHSNHQQQAPSATTATASPSRNLSSASLASAASEPPSSPLPPGSRGLPSDYQAFIHTSRYARWVEAKRRRETWPETVNRYLDFMQCHLRTTCAYDLPPQLRAELAEAVIALEVMPSMRSMMTAGDALSRCHVAGYNCSYLPIDHPFAFDEALFVLMNGTGVGFSVEAHQVEQLPPVAEKFVNSSTLVVVEDSREGWARALREVLALLWTGQIPRWDTSRLRPKGARLRTFGGRASGPEPLEALFLFAVQLFTRARGRRLSCLECHDLVCKVAEIVVVGGVRRSALISLSDLSDAHMRTAKTGAWWEEAGQRALANNSAVYTEERPDMGVFMA…
>CRv4_Au5.s27.g10043.t1
MKVLVAVKRVIDYAVPVRVRPDKAGVEALLPKLSMNPFCEIALEEAVRLKEKGVASEVVAVSVGPQHFQDTLRTALAMGADRAVHVPLAADTFAAAGAGGAAGAGGPPAASESPLQPLGVARVLAALAGREGAGLVLLGKQAIDDDCNQTGQMLAGLLGWPQATFASRLELDKGAAAARVTREVDGGLEVLSLPLPAVITADLRLNTPRFVTLPAMMRAKKRPIESAPLEGLGLAPHDVAPALAVIGVEEPPTRAAGTRVGSVEELVRRLREEARVL
>CRv4_Au5.s28.g10053.t1
MQSSLCAGSAGVGVGRAAAPMAQRSMLFKRPIFVGTAAELGLKPATSAIAKKSKQSRAQTIRVQASGNAAALPWQAAMSEIKKRRDINTIMIIGAGPIVIGQACEFDYSGTQACKSLKKEGYRVILLNSNPATIMTDPGMADRTYVGPMTPELAEQILAKERPDAILPTMGGQTGLNLAKTLAERGILAKYGIELIGAKLPSIDRAEDRELFKQSMTRIGLKCAKSATANTLEEALVIAAEIGKYPIIIRPAFTLGGTGGGIAYNIDELKEIVSGGLQASMTSQVLVEQSLLGWKEFELEVMRDLNDNVMIVCSIENVDPMGVHTGDSITVAPSQTLTDKELQRLRDASIAIIREMGVECGGSNVQMAVNPEDGEMVIIEMNPRVSRSSALASKATGFP…
>CRv4_Au5.s29.g10094.t1
MYWASHSRLSWLPAVTHARQFASYPAHVVLNMPSLSPTMTQGNITKWHKQPGEQVAPGQILAEVETDKATIEWEAQEEGFMAKHLVPEGARDIAVGTPVAVLSEEADGVAGLASFTPGASSSSGGSAPAAQATEPKAAAAAAAPAKPAATLPPHQVLNMPSLSPTMSRGNIVEWKKKVGDSVAPGDVYCEVETDKATISWESQEEGFIARILLSDGSKDIEVGTPVLVLVEEKETVPAFADFTPGAPQAAAPAAPAPTPAHVPAAPKAAPAAAPRPAAPSAAATASAGGRLRSSPYARKLAAELGVQLQSVAGTGPGGRVVAADVKSAPRGAAAAPSAGAATAAPSAGAAAAAGTEGEYTDIPHSQIRRVVARRLLESKQTVPHYYLTMDCNVEELLAL…
>CRv4_Au5.s29.g10106.t1
MSSQAMIPSTSSPAARAPARSGRRALAVSAKLADGSRRMQSEEVRRAKEVAQAALAKDSPADWVDRYGSEPRKGADILVQALEREGVDSVFAYPGGASMEIHQALTRSDRITNVLCRHEQGEIFAAEGYAKAAGRVGVCIATSGPGATNLVTGLADAMMDSIPLVAITGQVPRRMIGTDAFQETPIVEVTRAITKHNYLVLDIKDLPRVIKEAFYLARTGRPGPVLVDVPKDIQQQLAVPDWEAPMSITGYISRLPPPVEESQVLPVLRALQGAAKPVIYYGGGCLDAQAELREFAARTGIPLASTFMGLGVVPSTDPNHLQMLGMHGTVFANYAVDQADLLVALGVRFDDRVTGKLDAFAARARIVHIDIDAAEISKNKTAHVPVCGDVKQALSHLNR…
>CRv4_Au5.s3.g10133.t2
MAVPLDVVITYPSSGAAAYPVLVMYNGFQAKAPWYRGIVDHVSSWGYTVVQYTNGGLFPIVVDRVELTYLEPLLTWLETQSADAKSPLYGRADVSRLGTMGHSRGGKLAALQFAGRTDVSGCVLFDPVDGSPMTPESADYPSATKALAAAGRSAGLVGAAITGSCNPVGQNYPKFWGALAPGSWQMVLSQAGHMQFARTGNPFLDWSLDRLCGRGTMMSSDVITYSAAFTVAWFEGIFRPAQSQMGISNFKTWANTQVAARSITFDIKPMQSPQ
>CRv4_Au5.s3.g10140.t1
MCGMQLSPTAGEEEQRPAPAGGRGTLTVVDNRTGKKYTLEISDGGTINAQALKQIKAGGDGVGLRTYDPGYTNTTAVISRISFIDGDKGILRYRGYPIEELAARSNMMEVAYLVLYGSLPTQSQLSVFHEAVMRHTALPTEVIDVIHAMPHDSHPMGVLMTGICALSAMHPEANPALAGQGVYKTREMQDKQIVRLLGKIPTIAAMAYHKSTGRKAAPPNQRLDYTENFLYMLDGGYNPQYRPNPRLARALDIMFLLHAEHEMNCSTAAVRHLASSGVDVYTAVAGAVGALYGPLHGGANEAVLRMLARIGSVENIPAFIAGVKNKKEKLFGFGHRVYRNFDPRAKIIKDVAENEVFPLVGVDPLIEIAKALQDAALSDEYFVSRKLYPNVDFYSGLVY…
>CRv4_Au5.s3.g10178.t1
MAQNRGAAGGSQAPSNRAPEYSIIVPTYNERENVAVLMWMIDRAMQEAGAGYEVVFVDDASPDGTADAVRELIRAFGTHRVRLITRAGKLGLGSAYGSGLAHASGEWIILMDADLSHHPKHLPAFIAKQRATGADVVSGTRYQLGGGVAGWNLVRKLTSRGANILASFILGARTSDLTGAYRLYRRDALAKLLAATKSRGYAFQMEVIVRAQYSGLRIEEVPIVFVDRLYGQSKLGVGEYVQFVKGLLRLLVGL
>CRv4_Au5.s3.g10234.t1
MYLARSGWKVQVYERRPEPGPANTSRQRSWVLAMYPRGIRPVNEVAQVPLLAERAYKGLVLKPAKPNSKPIVLERTGVLMDRTLLATSLLDAARAQYSSRVSFTFNAALSDVDLTAKAATFASAAATANVEAGKELVAAVAGSSSNSAGSTMAVAGEQQQQYRAQYDLLVGADGSSSTLRSLLTEALPGQFETEVLSPGTGCYKSVYGLPPVPEVEAWAPDSNTPRDQRVQGEFFFFLSGGTKGMMSMCRDIDGNYCGYLAGNAQLFAELKTREDYLAVLPQAGPQLPAAWLPLIADRMMEAPLSTFPTMRSLSRFWAPGGVVLVGDAAHTVTPALGQGLNSALQDCELLAAELAAAPSLDAGGIDAAIRRFSESRAPEVRALQELELLQGSSLSPLGR…
>CRv4_Au5.s3.g10243.t1
MLRQSGLSANKLFCSNLLQSQQKEGNKLVWNAMLFSSKAEGSAVQQVVASEGVAQAVPQFSSEAAAALAAKRRGLIGSGMSLAPSKPFAARGLTSAAKPAAAAAAGAAEAAQPADKYAGLKKVLKAAAALAAALGLTTTTAAADSPQPWQLLFQDTATSTAQAMIDLHHDIFFFLITVVTLVFYMMFQIITKFHYSKVLKPEKLTHHTTMEVIWTIIPTLIVVMIAIPSLTLIYSLDQHTERPGLTVKIIGRQWYWSYEMHDHLQHKLLDPDRLVGIAEKALVK
>CRv4_Au5.s3.g10247.t1
MATATAPALNKRIGFLGSGQMAEALARGLMKRGLVSGEHIACNDPNPARTNLFKSFGATPYESNADVARNADVIFVAVKPQHVAQVLSEVRPVLTEGHTVVSIAAGITIDKLVEAAGPDAHVVRVMPNTPCLVGETAAAMCLGGKANADDETLVRTIFEAVGKIYTVDEKLLAAVTGLSGSGPAYVFLMIEALADGGVRAGLPRDIAQALAAQTVLGSAKMVMETGTHPGALKDMVTSPAGTTIAGVHELERAGIRAAFMNAVVAATDRANQLSKM
>CRv4_Au5.s3.g10256.t1
MQSVLAKEKAKMRQKLLSARDTGVPGGGPRDTLTRLPARGTPVEEVAARLQRRALADVQLGADGESRLSGAVYMAAHSPHRRLLDSTVAAFSLTNPLHADSFPSVRQMEAEVVAMTAGLLGGGPAGPAPQVCGAMTSGGTESILSAVKASRDYMAARRGVRRPEMVIGVSAHAAYWKAAEYFNIKLHVVPVGSDFRLRAADVRPRLNANTVLLVASAPGFPHGLVDDVQGIAGLAARAGICCHVDACLGGFCLVGGGAEIASC
>CRv4_Au5.s3.g10259.t1
MSSALSLANIRSSLIRQEDTIIFSFIERAQFCRNLPVYTPDAIPVPGFDRCGRRYSLLEYVLRQTEQLHGSVRRYTSPDEHAFFPDDLPTLVLPPITYPSVLDPCADAININDQILRVYVDDILPGLTTPGDDFNYGSSATLDVPCLQALSKRIHYGKFVAEAKFLAKPEEYSALIRAGDADGIMALLTDKEVERRVVERVRRKVATFGQDVTENGTAAASGANGDGAPRLKVSPDLVARVYEEIVMPLTKEVEVIYLLRRLDSQQAGGPAAGSSASASSSASGSASGNSSPSTSAAAATR
>CRv4_Au5.s3.g10316.t1
MQMQLNAKTVQGAFKAQRPRSVRGNVAVRAVAAPPKLVTKRSEEIFKEAQELLPGGVNSPVRAFRSVGGGPIVFDRVKGAYCWDVDGNKYIDYVGSWGPAICGHGNDEVNNALKAQIDKGTSFGAPCELENVLAKMVIDRVPSVEMVRFVSSGTEACLSVLRLMRAYTGREKVLKFTGCYHGHADSFLVKAGSGVITLGLPDSPGVPKSTAAATLTATYNNLDSVRELFAANKGEIAGVILEPVVGNSGFIVPTKEFLQGLREICTAEGAVLCFDEVMTGFRIAKGCAQEHFGITPDLTTMGKVIGGGMPVGAYGGKKEIMKMVAPAGPMYQAGTLSGNPMAMTAGIKTLEILGRPGAYEHLEKVTKRLIDGIMAAAKEHSHEITGGNISGMFGFFFCK…
>CRv4_Au5.s3.g10333.t1
MQATTRVPAKSGVSSSAKRVAASGRRVLVVPNAVKDVFMPALSSTMTEGKIVSWLKNVGDKVKKGEALVVVESDKADMDVESFADGILGAIVVQEGERAVVGAPIAFVAENANEVEEAKKKAAAAGGAAPAAAPAAAAAPAPAPAAAPTPAPAAAPAPAPAPVAAPAPPAPTPVPAAPVGRADGRIVATPYAKQLAKDLKVDLATVAGTGPNGRITAADVEARAAGKAVAPAAAPAAAPAAVAAAPAAAPAKAAAPAAAPAKATTVSELRGTTKPFSTLQAAVARNMNESLKVPEFRVSYAITTDKLDALYQQLKPKGVTMTALLAKACGVALAKHPLLYAACTPDGNGITYSSQINVALAVAMPDGGLITPVLKNADSTDLYQMSRNWADLVKRARSK…
>CRv4_Au5.s3.g10341.t1
MSGDFGSEPLGSCSVETVTALLGYGLEQDSITALCQPEGGAGCTSTDNCMFQYLMGATADAQSTASDVGVGLDVSFLLFSGYLVFVMQLGFAVLCAGSIRSKNCMNILLKNMLDACVGAIGFYVFGYAFAYGRKYGQNSNGFIGNWNFALSYTTQTSMSGTEFTTFGWHQFFFQWSFCAATTTIVSGAVAERCTFMAYMIYAFFLSSFVYPVIVHWVWDGQGWLSAFNTFQDGYALILKTGAIDFAGSGVVHMTGGIAALMGAWIMGPRVGRFANDGTVNEMRGHSSTLVVMGTFLLWFGWFGFNPGSNLVVASQAAATVVSRVAVTTALAGGAGGISMLFYKFLTVKAWDVVATCNGILAGLVAVTASCSVIEPWAAIITGAIGAIIFSIADYVTLYK…
>CRv4_Au5.s3.g10345.t2
MTTSEVLSPPPPSQVASLAQPQFNVEALQAFSMPLVADVVNTENGDVASFARSSWHKESGKAGAFGLPTMLDMKAEALEQVQLDTWSAQPVDRGPAAAAPDPKLLRSWQYQATGKLATAQVLVDVKAEHIKAGGPMGMKQEAIKHILRHKPDDTFYVVDLANVQRMFKRGAEPEDPASLQTAQPLLLLAWRAAMPRVVPFYAVKCNPEPGILKLLNALGAGFDCASKGELDMMLRMGVSPNRIIFAHPCKRASDIRYAREHNVQYTTFDTVSELHKIAQMNPDFKCVLRIRADDPDARVPLGLKYGAEVSEADVLLRTAKELGLQVVGVSFHVGSACQNLSTFSGAIENARKVFDEAGALGFNMELLDIGGGFTGHFDEMGNVMFGEIANTINAALATN…
>CRv4_Au5.s3.g10351.t1
MASNNVTVGFSVGASSSAFSDASSFSFPARSAPAGPVARPPRTGVSLLSRALSTGEKEQDLLAHLPPVLPSTDAADPLLFFPGIPLELLREAQAEFPIFNNELLVHAYGLAARAHQNQQRKNGESLLSHCVAVAKTVAGLGLDAETVAAALLHECVDMVSRSQLEEFMPPSVVSVLEHVNTISEMSRLYRQHSATGSFSDETFQRLLVGFEDVKAVIVKLSDRLAELRTISVLPADRQAALARETLEVYSVVANRLGVWCLKAELEDLAFSVLHPQEYNWLKEAVRTRQDPVALETAINSIKGALQAQGVAYEDISGRPKNLYGIFMKLQKDGKPLTIESLNSLYDLMALRVVVAHKHECYTALRAVQSVYRVMPSRSKDFIKDIKKPNGYQSLHETVY…
>CRv4_Au5.s3.g10359.t2
MLLLGLVLALAGHVAAAPSSAMMGTGHTVGFGELKEEWRGEVVHLSWSPRAFLLKNFLSDEECDYIVEKARPKMVKSSVVDNESGKSVDSEIRTSTGTWFAKGEDSVISKIEKRVAQVTMIPLENHEGLQVLHYHDGQKYEPHYDYFHDPVNAGPEHGGQRVVTMLMYLTTVEEGGETVLPNAEQKVTGDGWSECAKRGLAVKPIKGDALMFYSLKPDGSNDPASLHGSCPTLKGDKWSATKWIHVAPIGGKKKLNLGTPECHDEDERCQEWAFFGECEKNPGFMDAQCKRSCKKCT
>CRv4_Au5.s3.g10363.t1
MSPDIRELFSRQLWYRETKRRLKKFRPKDVWATLIQERWTILVTGIFASGLLALELTAWSDLSTDAWFTLWTTFAAVVPMIRGVVDADVCLFAASTLLLLRGIIQARDAFAGLANDSIVSIALMMMIAAGLESSGALEFVPELVLGRSKREWVGQLRMHIAVASVSAVMNNTPLVAVMIPVVESWCRNNNHHPSRFMMPLSYSAILGGLCTIIGTSTNLIARGLAQQDDPKLKLPFVEVGIIGLPLTVAGGIYVVLFSPLLLRKRDTMMAAVVADPREYVVSVRVDARFAHIGRTIESAGLRHLRGLFLADLQRQDGATVPSPPPTTIILQGDKLTFAGDIQGMQHILSLPGLTPISSADLAADLEETVAGSPSSDRIMVEAVVSLSSPICNMTIRDSH…
>CRv4_Au5.s3.g10365.t1
MTTPEVYNLPEQWSEELKDENGEPMSKSEFKRRQKANRLAAEKAEKEAAKAAKAAAAPAKPAKEADGPALEDDSTEITDPTAYFENRVKYINAKKAKGVNPYPHKFHVSMSLPDFVAKYNSLEAGQQLTDVTVSVAGRIYSKRSSGSKLVFYDLKGDGSKIQIMADARNSDLDAEGYAQVHNECKRGDIVGVEGFPGKSKKGELSIFPKKFAVLSPCLHMPPSAHFGLKDQETRYRQRYLDLIANSDVRSIFFTRAKIIQFVRRFLDTRGFLEVETPMMNMIPGGAAARPFVTHHNDLNMQLYMRIAPELFLKQLVIGGLERVYEIGRQFRNEGIDLTHNPEFTTCEFYQAYADYKDLLDLTEQMISQMVYEIKGSYKIAYHPDGPEKPAIEIDFSPPW…
>CRv4_Au5.s3.g10375.t1
MGKPDNDGDLSHSLYTPELLRACQRLPKIELHAHLNGSVRPQTIKDILDERSRAGEALPVTEQELADITVGGERSLRDCFRLFDVIHAVTTTHAAISRIAAEVVRDFAADRARPEYGMTKESYTQAVLDGIDAALAQLRAAPPRAASQQQLLPADAPAAAAVALSPAAAGSTASAEPGRQAGAGAGAGGQGAGEVASPSHAQMVAASEGVVLSPRAAPSHASAAGVDVAASVSSGTSAAAAAGAGAKGPGTMAESGPGEDVITVKLLLSIDRREDAAAALETVQLAARLQSRGVVGVDLSGNPYVGAWSQWEGALGAARAAGLRVTLHAGEVVAPQEVAAMLAWRPERLGHCCCLDAELAAQLKSSAIPLELCLTSNVLTQSVPSYPEHHFAELYAAGH…
>CRv4_Au5.s3.g10384.t1
MNITAPTRLDSRPVASARSSARSVAPRVASRKSTVRIAAVAAPERPITDYQRPDANGRYGQFGGKYVPETLIPALEQLEKDYNEAIADPAFKAEMEAILKDYVGRETPLYHAERLSAHYKTADGGHAEIYLKREDLNHTGAHKINNSLGQALLCKRLNKQRIIAETGAGQHGVATATICARLGLKCIVYMGAKDMERQALNVFRMRLCGAEVRPVHSGTATLKDATSEAIRDWVTNVETTHYILGSAAGPHPYPMMVREFQSVIGRETKVQAQEKWGGLPDIVMACVGGGSNAIGIFNEFINDTSVRLIGVEAGGEGVNTTKHAATLTMGTPGVLHGSYSYLLQDDDGQIIDPHSISAGLDYPGIGPEHSFLKDVKRAEYYAVTDAEALEGFQLLSKLE…
>CRv4_Au5.s3.g10394.t1
MATSEQEKQAHAKDFWMQAAITYGYIALWIFLSALVIMVNKYVLAYAHFPFPIALTLTHMAFCSGLALLIIKLGLVDTVHMDSSTYFKNVVPIAALFSGTLWLGNAAYLYLSVAFIQMLKATMPVTVFLVGVLLGTEKYSALYALNMVVVAVGVAAASYGELNFDLVGVIFQSGSIVTESFRLCLIQLLLQSRGIKLNPVTTLYYIAPACFVFLCFPFTFIEAPKMLNTTDWAVPVGWLMLSAAAAFALNMSVFLLIGRSSALTMNIAGVIKDWLLIFLSVLLYKSPVGQLQLMGYGVAFLGVCWYNYQKLQGARPPVPTTKSIPDLEKSPLLRTSNSETGNSRNN
>CRv4_Au5.s3.g10405.t1
MIKSVLLVFAMEAEAQPLIQALGLKEDVPAKIVGPAPCVTYSGEHQGLAVHVVWNGKCKDHGVDNVGTVPASLSTYLAVLAFKPDVVISAGTCGGFKAQGAAIGDVFLGSAVINHDRRIPLPAFDKYGLGHAALLATPHLQAALGLKSGVVSSGNSLDYTDKCMEIMTGHGAALKEMEAAAIAWACALYKVPLMCVKAVTDIVDGDRPTAEEFLENLHSAAAALQGTLPKVLGFLAGKELQAL
>CRv4_Au5.s3.g10407.t1
MLYVTKKQEACQKAGMNTYVHHLPDTVSQSQLEAALAHVCADGRVDGVLIQLPLPRHLSEEAVMEVLDPRKDVDGFHPLNMGRMLMRGRGVRLVPATPLGCIELLRRSGVDVQGKNCVVLGDSNIVGTPLAAMLRDKGAAAVTICHRRSYREWFEDQQEVQRKRAAAAVCLPRLPGPTPAPAPPPPPPASPSGGPDGGGGGPDGGDSFQSYQLPDLTRSADILVVAVGHPELVRGDWVRPGAVVIDVGINVVSTLPRSPPRVSSSGSSNGSGSSNGNCSSSSDGGGSSCNSEGQGRQTGECRGSGGGGGGDGSSSGSGSTTISSSTAVVSPDLGDAESSASIVAAATAAAAGAGNGGAATGDGDGCGDGSGGGGGSSGSSGVAASLYSHRNVVFQVVGD…
>CRv4_Au5.s3.g10421.t1
MIPTAPQSWHVLGAGSVGLLFAFYLRKAGHNVTLILRNEAAIQSFNRYSGSRVHLLERWRQPPASTTCGPPTRATAPPARFQASEPLQAVCLPANPQTSCHKTQHTQHQPAQPRAPGSAASLPALQAAAALLKGAPIQHLVLATKAPDAVPALRAVLPHLAPGARCLLLQNGALAVADELRRELGAQLVLPGPAGPGLLPPAAARRPLGGGADGAEGDAGDTAGVVAGGGGSAPRASAAAGVSTTSSNAAAAARGDVRLYVGSVTHGCYRAAPPVHDGPTVGLGGLLVGSMIWMTAIVIVGAATSPATAFVMTLVAYVATMDNPRGVGERARGIVHAGRGAVTLGPLRPLLAALDAPAGLGGGSSGSSSGSSNAPNSSEVCGGAYSTSEVADDAAFIAQ…
>CRv4_Au5.s3.g10432.t1
MGRERGARALQDLQEHPCSARKLAERAAYSTIIQKSVPLPLPESRLVCLVTDLTMAIAAERTSQVAINYKDQDPVSFARMNARVQALLQAYAAANCHDWRSFARWSDAGYLRHLLHECDDFELMLICWKPGQTSRVHNHADSHCWLAVLAGEVQETQYRPVVPKAEAEAEPHAPAPLSGASPPELSALLLSEAEGSSGCSSLSSSGESNASFAAAQMQAQFSKLQEQRREQAERQAEEQEKGQAEVLCCDDLRLVRTQTRCVQVGGVAYINDGLALHCVGCPAAAECPNAIASTGTNTTSTAANSGSKGPVAGQGSCSGRKGGRAAAAMSSSGGLTALFGRRVNGTIGSGCADALAYPAAADGDMATANGANGWACTLHLYAPPIRRVKAYEAGGHVTE…
>CRv4_Au5.s3.g10440.t1
MAALNYARPIELNPAGEHKSTMIMLHGLGDTGDGWSDIGYMYKSSLPNTKFIFPHAPRRPITINFGMSMPGWYDIASLEEVNRSEDAEGLQESKRYIEELIAKEVAAGIPASKIVLGGFSQGGAVALMMLRSATQLGAVVALSAYVPLHTQQPVFSEANAKTPILMCHGDADQTVAFAFGQKSYQLLQSLGANVEFQAYVGMGHSACQREFDDVLEFVKPVLAA
>CRv4_Au5.s3.g10443.t1
MAEQEKPKEEHAPINFDENHEEKRDFVISEGLTTAEAEELIKVHGRNELEEKHTPSWLIFLRQLYQPMPIMIWIAAIVEGAIENWADMGILLGIQFINATLGWYETTKAGDAVAALKASLKPLATAKRDGKWANIDAGNLVPGDLVLLASGSAVPADCLINHGTVDIDQAALTGESLPVTMHKGDSAKMGSTVVRGETEATVEFTGKNTFFGKTASMLQQSGGELGHLQKILLTIMFVLVVTSFILCGTAFGYLLGMGEPFKEALSFTVVLLVASIPIAIEIVCTTTLALGSRELSRHGAIVTRLAAIEDMAGMNMLCSDKTGTLTLNKMAIQDDTPTYLPGLDQRKLLHLGALAAKWHEPPRDALDTLVLTCETQDLSALDVYEQIDYMPFDPTVKRT…
>CRv4_Au5.s3.g10453.t1
MALRAVSAKSAVRPTVARASVKPVAALKPAQKMALAGAASVALLAASSSSAEASQVIATVASAAQGYPFVPPSWAPSVFVPLTGLVLPAIAMATLFVYIEKEAPSS
>CRv4_Au5.s3.g10466.t1
MATTVSPADANLGLHIANRLVEIGCTSCFAVPGDFNLLLLDQLLKQPELSLVWCCNELNAGYAADGYARKRGVGCLCVTFCVGGFSALNAVGGAYSEDLPLIVISGGPNSQDHASNRILHHTTGANEYGQQLRAFREVTCCQVVIQHIEDAHMLLDTAISEAMLKRKPVYIEVACNLADLTHPSFARPPVPYALASSHTNAASLEAAVEAAVEWLGGGVKPLLLAGEGEGEEEEEEEEEEEEEEEEEEEEEEEEEGEEAAWGLGGVRTRPPAARKAMLALAEASRYPVAVMPDAKGMFPEDHEQYIGMYWGPVSTPCVCEVVESSDIVLCVGGVWTDYSTAGYSLLLKPEKMLRVDNNRVTLGNGPTFGCIVMTDFLEALAKRVAPNDTGHVIYKRMAL…
>CRv4_Au5.s3.g10489.t1
MQPRHPEQPGGHAGPCGGAAAPAAPAAASVHATPASKPASAPAHTLVLIRHGQSAWNLSNRFTGWTDVDLTPEVKSWRLNERHYGALQGLNKAETAAKHGEEQVHIWRRSYDTRPPPLEPNDPRHPRFDVRYGDLADEDLPATESLKDCVARSLPFWHSDIAAAVCRGRRVLVAAHGNSLRGIVKHLDRISDQDIVQLEIPVGCPLVYELDEHLTPLRHYYLGHELLASPALDVMALPDGLGVLDGLGAVAVMKVETRKDASLQCLLRALVDGGATSPDHVHDAATAAALAGDLAQAEELLLRGGLAAAQFVFTSLSLDGGGSGGGGQEAAAIEALIAPPPAGPADEDGAAAAAAVVGGGRGTGGEEGTGVRAALKQPGGESRRLLVALRRLAPLMDAD…
>CRv4_Au5.s3.g10491.t1
MATLIGPGRVGKAIAGMLGAELGAVVTRQSGAVDPHGQGPIYVCTTNDALDWVLEQTPRNRRCDLVFFQNGWLAPWLAHNSLRLGPGSAAGAAAEGGAAAAAGREAEAARGDGGGAGGAEASGPGSAVEVTLVALYMAAGPDGTAKDGLRTVASGRWAQHVSRTLSRGAVRCRAVGGADMYGAVVEKLLWACVFWMMSAALGGMNVGDIVARHRGDVAALTAELLPPLCRQLRGIAAAGAGPEAAEAAAALEAPAGAERVVAALVEYSVSISSAVPSRDMALAEFRWRNGALLDMGPTPLHVPGVEVVEVRTKDELESVAGLIIPGGESTTMALVAERWGLIPELRSFAKAGKPVWGTCAGMIFLAEGAEGQKEGGQTLLGGLDITVSRNFFGAQINSF…
>CRv4_Au5.s3.g10521.t1
MLQAQRVGRACTNARQQQPVARPAMLAGRAHLTSPALRSRPAPGTATFTQPKQQPKPVVHTQAAAGAGASATPAPQSSGGNSTFTQAVFNVVNVMMGVGVLSLPFALKSSGWVGLLVLWVMGVATNYTAKALCECADAVSAKTGGGPVGYEEIAEAAFGPLGRLLVSAIIYVELFGTCALLFILEGDNMFKLFGASSLASNASTYQLLAAALMIPTVWLPDLKALSFLGAAGVTATCTVSAAVAYTFLSGSFAPGAPTDLANWATLPLVLGICTFCYSGHGVFPAIQKSMADPKQFPQVLNVAYLAVAVICTLMGAAGYYMYGTGALDLVTFNMVGPLAAVCASVILINPVAKFALTMEPPAAALQGVIPGAKKGIMRLLTRTALAIGILLAARSVPFL…
>CRv4_Au5.s3.g10524.t1
MVAAQASARPIATNEQKLELLKKVECFIFDCDGVIWLGDKVIEGVPETLDMLRGMGKKVFFVTNNSTKSRAGYMSKFQSLGLNVKAEEIYSSSYAAAAYLESINFNKKVYVIGETGILEELDLKGIRHVGGPGDADKKVTLKSGEFMEHDHDVGAVVVGFDRYVNYYKIQYATLCIRENPGCMFIATNRDAVTHLTDAQEWAGNGSMVGAIVGSTKREPIVVGKPSDFMLKNISASLGLRPDQIAMVGDRLDTDIMFGKNGGLATALVLSGVTTPEVLNSPDNKVHPDFVLNSLPDLLSVKEKAMVAA
>CRv4_Au5.s3.g10538.t1
MSQNGAGTLIKTKPRCERNRVLVTGGAGFVGSHLCDYLVARGDHVICLDNFFTGSKENIAHLIGKPNFEVIRHDVVEPILLEVDQIFHCACPASPIHYKYNPIKTAKTSFLGTMNMLGLAKRCKARFLITSTSEVYGDPLEHPQRETYWGNVNPIGERSCYDEGKRVAETLTMDYYREHNLQVRIVRIFNTYGPRMALDDGRVVSNFVSQALTNKPITVYGDGQQTRSFQYVSDLVKGLVTVMDGPEIGPFNIGNPGEFTMLELANLVKEVVNPKAVIEYRENTADDPKCRKPDITKVKTTLGWEPVVPLREGLERMVDDFKKRLGVE
>CRv4_Au5.s3.g10547.t1
MGHARNYLSFDIVRRVLEDYFGYNCLMVMNVTDVDDKIILRARRNFLLAQYKSSGKSAEEVKEFTIEAIQAGIAKQQKKVAEMEAMVAKDSTEAEAEPDEKKRSFALRKVADLQEAVKGEALKGRQAAEALAAVQALGAAGSSADAEALLAVGSDYVAEALDKALGANVTDPTVFRAHAAKYEREFLEDMDALGCRRPDVLTRVSEYIPEIIEYVTRIIGNGMAYASNGSVYFDTQNFRSCGHTYGKLNPWAVGSAALAAEGESNFETSEKRSPQDFALWKAAKPGEPAWESPWGVGRPGWHIECSAMASSIIGSRLDIHTGGEDLRFPHHDNELAQAEAYYHHDGCKQWVNYFLHCGHLHIEGLKMSKSLKNFVTIREALASFNARQLRLMFCLQPWN…
>CRv4_Au5.s3.g10576.t1
MADLSFLNLEEVEEEAKKVMPKMAFDYYSTGSDTCYTVGENRSCFSRYLLLPRMLRNVSRVDTSHELFGIRSSMPVWVAPMAMHGLAHPGREVATCRAAAAAGVPFTFSTVATSSLQEIQETGHDNRIFQLYVIRNREVVRRWVTEAESRGFKALMVTVDAQRLGNREADARNKFTLPPGLALRNLEYLSSASTVQARDSQDGSGLMKLFTSEVDDSLTWEFIPWLRGVTKLPIIVKGLLSPADAELAVQYGVDGIVVSNHGGRQLDYAPSGLHMLPAVVAAVRGCGSSIPVLVDGGVRRGTDVIKALALGASGVLLGRPVLYGLAVGGQAGVERVLQLLRSEIELSMALAGCSSVQQIGPQLLLPAPSAGPAPPMPAAQLCKL
>CRv4_Au5.s3.g10589.t1
MTDSTYDFGAVRDDLTPLEDDCKLLGSLLDDCLRVEIGETMFKKIERIRALAQCASNLSIKGDAGASDMLSHRLAEELMNLDMDEAVPLTRACGHYLNLSGIAELHHGVRRDRATREPNPNSCDAVFARLITEGVDPEELYRAVSEQNVEVVLTAHPTQVNRRTLQYKHTRIAALLQQHDRSDLTAEERRNMVSELQREVAALWQTDELRRQKPTPLDEARGGLHIVEQSLWAAVPQYMRRLSAALKKHTGHDLPLQATPFRFGSWMGGDRDGNPNVTAKVTAHVTALARWMAADLYLREIDTLRFELSMNQCSAAVWKMARRIIAEGHTKRAGVVRAKAAAALHQTATDAASHGGSAASAAAAAAAGGDVVADGTSGGGAAAAAGPAAAAAADDAFTF…
>CRv4_Au5.s3.g10590.t1
MLAAKHAQATVRGVRAQAPMMAALRASSSVHPFTAASGASAFLSLAASSSAAPRAAAAPARGRAGLVVKAQAADASAERPVCLVTGASRGIGKAIALALGKQGARVAINYASSAGAAEEVAAAVVAAGGEAMVVGANVGKREEIDRMFKEVMDKWGRVDVLVNNAGITRDTLMMRMKPEMWDDVIATNLSGVFYCTQNATKIMGKQKKGRIINITSVVGIVGNAGQANYSAAKAGVIGLTKTTAREYSGRTITCNAVAPGFIASDMTAAIDKKYEETILKGIPLGRYGQPEEVAGLVRFLALDPAAAYITGQVYNVDGGMVM
>CRv4_Au5.s3.g10595.t1
MFALIAGAVGASGGRLHRSATSSVAAGALWLQQLLPVPPASLASADQRRPASLLLLLTGTVRELRTGAAVRRRQLLLQQRKQQAALANAAVDDALLPKVALVGRPNVGKSALFNRLIRRRQALVYDTPASHVTRDYQEGRAQLGDLVFRVADTSGLEPRTAAAAGTIQVQRGRATSITAKLLSQSHLALMVVDAKTGVLPADEELAEWLRRHVPAGRVMVVANKAEGGRAQEEMPQTVYDCYRLGFGEPMAVSASTGEGLADLFAALQPPLDAVSAQLRAADEAAKQRAEERRDREREARRREREVEVEVEEGRRGRRRPRLFPVAGAGGGAGGEEGLAAAQASDSDDEEEEDEEDAKPAGGLGVMKLAIMGLPNAGKSTLLNALLGEQRAVTGPEPGL…
>CRv4_Au5.s3.g10596.t1
MAPQTSPMVSAALATMQPKQEQQPAVPALSSALNTGILGKMVAASATEVAPRKIELYSSEYYWTCALGGVASCGLTHMGVTPLDVVKCNIQTNPAKYKGISTGFRVLVAEQGAAGLFKGWVPTLLGYSAQGACKFGLYEYFKKTYADMAGEEVAKKYQSAIFLAGSASAEFFADIALCPFEAVKVKVQTVPGFAKGLSDGLPKFVAQEGWGGLFKGIKPLWGRQIPYTMMKFGAFENTVQAIYKYAMPKPKSECSKGEQLGVSFAAGYIAGVFCAVVSHPADNLVSKLNAQKGATVGDIVKEMGWYALFTRGLGLRIIMIGTLTGLQWGIYDAFKVSMGLPTTGSVEEKKK
>CRv4_Au5.s3.g10608.t1
MQSLAKQLSATPRKAGRPQLCARERCARVVRAQAAGAPAPAAPAAAAAAAANSDEPKYVKNDKICKDVTEVIGNTPMVYLNRVTRGCVAKVAAKLEIMQPCSSVKDRIGRNMIEDAEKRGMIKPGVTTLVEPTSGNTGIGLAFTAAARGYKLILTMPASMSLERRVLLRAFGAELVLTDPAKGMRGAVEKCNEIAAKTPNSYILQQFENPANPEIHRLTTGPEIWRDTAGTVDILVAGVGTGGTVTGTGEFLKSKKPSLQVIAVEPSESPVLSGGKPGPHKIQGIGAGFVPAILNTTVYDEVIKIPSDDAVRMASRLAVEEGLFCGISSGAAVLAAVQVAARPENAGKLVAVVLPSFGERYLSSVLFNDLRLECEQLKQDERVKVVDAAGRERYVP
>CRv4_Au5.s3.g10627.t1
MASGEPLPRVLSVQSHVVHGYVGNKCAVFPLQVLGLEVDPIYSVQFSNHTGYPLFKGAVFDGEQLRALAAGLEANKLLNHTHLLTGYIGSLSLLEAIADLCAVMKSHSPHLTYVCDPVLGDEGRLYVARELADAYAAHIMPLASVLVPNQFEAETLTGGGAIGSVEAALEACDKLHARGPHTVVITSMSLPSDPDTITLVASTRQPQDAGGRLGGATAMCMRIDRIKAYFTGTGDLFAALLLAWMHHHPGDLALAVEKAVGGLQAVLAETVRHCGAAALVAERTAEVCALRELRLIQCQGQLQDPPIKYRCSPLERRQDGAAAAAAGVGPAAGAAGEVQGQGQEQLAPV
>CRv4_Au5.s3.g10641.t1
MSSIIAMPINEDGVVVVDRKLLGNEVESKARCADTACTAAAPAPPATAAAPTSMPELLQALQRAIDEEKATGQVAINAVDQTPESAARLSARVQALLSAYTSSNSGDWRRYAMFNDIHYVRNLVDANEDFELIVLCWKRGQVSRVHNHANAHCWLAVLDGEMRETQFQRASAPPGCPAPAASEHDGSTVYVEPTQVSDMRVGDAGYINDSMALHNVGCCMPALAAGEEGPEGGVTLHCYAPPIRRVKIYEDSKVTERVPGYYSKGGVRV
>CRv4_Au5.s3.g10656.t1
MPLLRMYRAAKRATKLPKDPDLAFCYGMLNDVSRSFAIVIQQLPNPLRDSICVFYLVLRGLDTVEDDMALDVDFKLPELRRFHERIYDRGFTMECGYNHYKRLMAQFGVVVNVFLALPPPHQAVIADITRRMGYGMAEFIEKEVVTVADYDKYCHYVAGLVGIGLSQLFAASGLEANSIGTEEDLANHMGLFLQKTNIIRDYLEDILEEPAPRMFWPRDIWGKYAPALADFKEPANRGAAVRCLNDMITDALRHLPYCLAYMEQLRHVMVFRFCAIPQIMAAGTLAACYNNGRVFEGVVKMRRGETARIFETCNDLGDLYTWFLQFLAAMEAKVSNEVDPTDPSLPLTRQRIAEARKACAAKLTEWKRTHPPPSESGAALTRDFLALSITGAYFYYVWQ…
>CRv4_Au5.s3.g10657.t3
MQTQLRAPCVSHKTRINGVPCSPKVVPRVARVPSGSAPEAPVASPEPTAAQRNVVAQVAKMIHAQTTTNKKGALVSELPAWQALKEHVNEIEKTHLRDLLHDEARCMSLIKECEGIYGDFTRQRVTQKTLELLFELAEQSNLRGKINAMFNGEHINSTEDRAVLHIATRAHRNQKIFVDGKDVVPDVWEVLDKIKAFSDKVRNGEWLGVTGKPLKNVVAIGIGGSFLGPLFVHTALRTEPVAMRCSRDRSLRFLANVDPIDVARALDGLDPEETLVVVVSKTFTTAETMLNARTVRSWLTSRLGPDSVAKHMVAVSTNLKLVKEFGIDPENAFGFWDWVGGRYSVCSAVGMLPLSLQYGFDLMQEFLAGANNIDEHFKNQPYQDNLPVLMGLTSLWNVS…
>CRv4_Au5.s3.g10664.t1
MRFASEYVQRNKPVIITGALENWKAMRLWGERYLTKHAVGSTQVTVDVTPNGRGDAPTTVALSGGEGPAAASSAAAQEPERNASNAAGAASGSSSGAQERWFVTPQERKMTLADFFALMRETRSRDTALRKGGRGSVEAPGSAGAKAYREVPYMQHQNSNLREELSALLGDVEPGLPWAEEVFGGPPEAINLWIGDQRSATSFHKDHYENLYAVVRGTKVFTLMPPCDAFRMRLRRFPAASYMRRRDVPPGARFGEVSPQPGALPHVGMAAAGGGGSNVSSGRSGLPPKQVAGPDTSDPDRLVAVLNVPGYQVLWSDVDCTADTYQSLGQRRAAQPLFYGAEPNGASSLPSGAPAAAAAAAAHAAHVAQEHAARAEHAAKVAAGEADDKNGDDDDDDDD…
>CRv4_Au5.s3.g10685.t1
MGTPRLASGGATGGDDSSTSTSAAAMLDDLVNGVNYERSGIPAAAGTSASSRFDLGRMHRLLEALGSPHLALKAVHVAGSKGKGSTVSMLASCFAAAGYRAGVYTSPHLLALEERIALAMPGGAGGRRPRPIPADDLAFLLRRHADAIRARVAAEGPGGPGALSHFELTTAMALRYFADCRVDVAVVETGLGGVTDATNVFPPPNLQAAVITGLGLEHVEALGGSLRSIATAKAGIARPGRPLVLGPQPYPEAAEVLRAEAARLGAAPVVRAEQSVRVRSHGMLLDPSAPPGRQAVRERLTLELLPEPSSNSSNSGSSSGSGSGSSGRTLEVTVGLVGPHQAANVATAVAAVRVLRGPAGGGWALPNEALAEGLAAAYLPGRFQVLKLPGAAGPYVVLD…
>CRv4_Au5.s3.g10751.t1
MLVDSFEVQSPNVVYSDEHITSTYDYASTKLDRAPDGKWVVKPTSTSYQFRVDRRVPKLGVMLVGWGGNNGTTLTAGILANKHGITWMTKDGLKKPNFYGSLTQAATVRVGNFEGEEVYAPFKALLPMVEPNDIVLGGWDISGLNLAEAMERAKVLDWTLQEQMVPYMREMVPLPGIYDPDFVAANQEERADNLIKGTKSEQLAVVRQQIRAFKEANQVDKIVVLWTANTERFAQVVEGLNDTADNLLASIERNEAEIAPSTLYAVACVQEGVPFVNGSPQNTFVPGMIDLAVKHNVLIGGDDFKSGQTKLKSVLVDFLVGAGIKPTSIVSYNHLGNNDGLNLSAPQTFRSKEISKSNVVDDMVASNSILYAPGEHPDHCVVIKYVPYVGDSKRAMDEY…
>CRv4_Au5.s3.g10755.t1
MGAGCSRTVHAEPANVAPIVQAKSVPKGSDESTPWVPEKKVVEKEAPEESNVVVVVAPASRTQSRKAPEETTAYGGSTRKLTILHFNDVYNIEPQDREPKGGAARLCAKVKEFRANGSNPLVLFSGDAYNPSLMSTITLGKQMPPVLNEIGVNVSCVGNHDFDYGLENMMKLNSQCNFPWLMANVIERGQEFPYGGAGTTWLQDWNGIKVGIVGLVEEEWLETLGAVNVADMEYKDFIEVGRAAARELKAKGAEVLIALTHMREPNDRKLAAEVPEFHLVLGGHDHHYVSAFIEPHNNLMVKSGTDFRDMSLIEVEFPNGSTTDPKMSVERLVIDGSVPEDPAAKEIVNEYMKLMGEKMDEDIGESLEPLDGRFQTVRNRESNLGNFVADAWRKAAGAD…
>CRv4_Au5.s3.g10757.t1
MTDRKLNILHFNDVYNIEAGRQEPVKQLKAKGVNPLVLFSGDAYNPSLMSTMTMGAQMVPILNEIGVHCSCMGNHDFDYGLPNLLKLNSQCKFPWLMANVLDRATGKPYADAAGTWTTEWNGIKVGVVGLVEEEWLDTLASINKDEMQYQDFVAVGRKLAAELKADGAELLIALTHMREPNDRKLAAEVPEFHLVLGGHDHHYVSAFIEPHNNLLVKSGTDFRDMSLIEVEFPNGSTTDPKMSVERLVIDGSVPEDPAAKEIVDEYMKLMGEKMDEVVVETLEPLDGRFQTVRTRESNLGNFVCDVWRKAANAQIAILNSGSLRSDTIHPSGQLKARDLVAILPMLDETVVLECTGAQVITALENGVSMWPKLEGRFPQVSGVKFSFDPSKPPGSRIVP…
>CRv4_Au5.s3.g10758.t1
MPYLKPSLAPPRLPASDRAQVKELKSHGDNPLVLFSGDAYNPSLMSTMTMGAQMVPILNEIGVHCSCMGNHDFDYGLPNLLKLNSQCKFPWLMANVLDRATGKPYANAAGTWTTEWNGIKVGVVGLVEEEWLDTLGAVNTAEMQYQDFVAVGRKLAAELKADGAELLIALTHMREPNDRKLAAEAPEFHLVLGGHDHHYVSAFVEPHNNLLVKSGTDFRDLSVVRVELPGGDAAPKLTPERISIVSAVPEDPATKAIVDEYMKLMGEKMDEVVVETLEPLDGRFQTVRTRESNLGNFVCDVWRKAANAQIAILNGGSLRSDAVHPAGKLKARDFVAILPMVDETVVLECTGAQVVAALENGVSQWPKLEGRFPQTSGVKFKFDPSKPAGERVVPGSVCI…
>CRv4_Au5.s3.g10761.t1
MAAMLSTTTIGFPRIGNQRQLKFAMESYFKGDSGEAELLAVAHKVQSDAWALQKAAGIAVIGLDGTLYDQVLDTITWLGAIPPRFKHLSGLQRYYAMARGGAALDMSKFFDTNYHYLVPELGPDVLGPATAAGAPLQPDFSGPLDKLARGQAVVGRERAVPILIGPVTFVSLSRGCELPLDQAVARLLPTYCALLQQLAAAGAPEVQLHEPVLATSEGAGMRAEFETAYAQMAQAAGSVPLHLVTYYDDLGAAYPWAVQLPVAAVTLDFLGPPGAAVPSQTLALLQQHGFPADKRLGAGVVDGRSVWKDDGTAVALLRALLDTGAVSSDRLVVTSSAPLQHLPYDLGLELEAPKTPEAEPHLPPALAARLGFAKQKVEEIVSVARLAASPAAAAAAAGH…
>CRv4_Au5.s3.g10770.t1
MLSRQALCLRAAAGLSALTQDFGALASAASSVAGTPSSHNSAATSQLLRSLPPFPAPFSSSWRSVSTATTSSASNVLAPALDREAVANTAAMSQLLTHMNGLHAVARAGGGATAIARHRSRNKLLPRERIDALLDEGSPFLELSPLAGRGLYGDDDVAGGGIVTGIGKVQGRLVAIVANDATVKGGTYYPITVKKHLRLQEVAAQCQLPCLYLVDSGGANLPRQAEVFPDRDHFGRIFYNQARMSAAGIPQIAVVLGSCTAGGAYVPAMADECVIVRGNGTIFLGGPPLVKAATGEDVSAEDLGGADLHCSTSGVTDHYAQDEAHALAIARDIVAHLPLPPTTLGPPATSWQEPVYPVEELRGVVPADARRPFDVRAVLARLLDGSRLDEFKTNYGTTL…
>CRv4_Au5.s3.g10772.t1
MQLLNQRQALRLGRSSASKNQQVAPLASRPASSLSVSASSVAPAPACSAPAGAGRRAVVVRASATKEKVEELTIQPVKKIAGTVKLPGSKSLSNRILLLAALSEGTTLVKNLLDSDDIRYMVGALKALNVKLEENWEAGEMVVHGCGGRFDSAGAELFLGNAGTAMRPLTAAVVAAGRGKFVLDGVARMRERPIEDLVDGLVQLGVDAKCTMGTGCPPVEVNSKGLPTGKVYLSGKVSSQYLTALLMAAPLAVPGGAGGDAIEIIIKDELVSQPYVDMTVKLMERFGVVVERLNGLQHLRIPAGQTYKTPGEAYVEGDASSASYFLAGATITGGTVTVEGCGSDSLQGDVRFAEVMGLLGAKVEWSPYSITITGPSAFGKPITGIDHDCNDIPDAAMTL…
>CRv4_Au5.s3.g10774.t1
MRTLLIDNYDSYTYNLFQVIAEVNGGVCLDVLHHLPDVPILGICLGHQALALAHGAAVVAAPEPVHGRVSRLRHSGHGLFADIPSGPGFEVVRYHSLLVDEATLPHCLQPVCWTDGAHVAVKLARDTTGATGAACSNGAGEEAGTEGAAMEPEAERPKSVGEAQPAASSSGRGQEAARLGGSLLMGLVHRSRPHYGVQFHPESVATKYGIALLRNFRDLAAAHLRSRGGPAAAQLQPARVVSDIVGPPGRLPELPVWPSPEHQCGAPLRLAWARLPGVLEALGGSQGLFERLYGWAEDTFWLDSAAADRGRFSYMGGRGGPLWRKLTYKLPPPPQQHQQQYQHHSSSSPVSHSVQQAEQMHDADSDAGSATSSSVSASSASGTACSSAAAAAGSASAPP…
>CRv4_Au5.s3.g10787.t1
MEPARPAGNGTEVGPVYRPAFHKDGFPKLEGVETCFDLFEKSCRLFADCPCLGERTVEDGKVGPYRFMTFREVEETVAAVASAYVKLGIKPHDRIGVLGANCKEWMISMQGMNRMSIVCVPLYETLGDTAVEYIIKHSGTRLVVSAGGKLKVLAKALASAPVKATADAGVVYWGAAADADLQALKATGVKVLSWEELVTTGKEAAEAVPVKPAAGDLCTIMYTSGTTGDPKGVMIPHRAVVSTIAGILAFLDFCKEKMGPSDSYLSYLPLAHIFDRVVEELMLSVGGCVGYWQGDIRQLMDDVCALRPTLFAGVPRVFERVYNGVRDKVDHGSFLSRLIFNWAYNRKEYYMKMGYKQDQASIISDLLVFKNVKAKLGGRVRVLVSGSAPLSQQMESFMR…
>CRv4_Au5.s3.g10792.t1
MDGMPPPPRAISPFAMQAVGYGDRRLAGLYDARFHSTHNGATPKDYRVLPERIILVRHAESEGNVDNKAYSYIPDSQVPLTARGHMQAREAGQMIKQVMKSDPEARDNFRLFFYISPYKRSLQTYEGICSQFPSHHLLGVQEEVQLREQDFGNFQDHVGKQREKAERLRFGRFFYRFPNGESGADVYDRITIFEDHMIRDINAGRFADKTSLVLVTHGLALRVFLMRWFHWTVDEFLSVYNPGNAEPLVLERVHFSDDTSWRHTKSLYRLTDESMRALKGCTMEMCSTDHLPRSGLKVSTRLL
>CRv4_Au5.s3.g10795.t1
MASLTCQRHMGASSRTAAARRSPVLRVVAQAAPAAPTASHAVPASKLIDGKGIADTIRSEIATEVADMKKQYGLTPGLAVVLVGARKDSETYVRSKKKACAEVGFDSFGTDLPADVSEEELLKVVAAYNADPRVHGILVQLPLPKHISEKRILDAISIDKDVDGFHPLNIGCLAMRGRDPLFVPCTPKGCIELLERMKVPIAGKKACVIGRSNIVGMPAALLLQRRDATVTMVHSKTPDAKKICSEADIVIAACGVAEMVTGDWIKPGAVVIDVGINAKDDATQKKGYRLVGDVEFEGAAAKASLITPVPGGVGPMTIAMLLQNTLESARRAAKGEKAHH
>CRv4_Au5.s3.g10798.t1
MKATLRAPASRASAVRPVASLKAAAQRVASVAGVSVASLALTLAAHADATVKLGADSGALEFVPKTLTIKSGETVNFVNNAGFPHNIVFDEDAIPSGVNADAISRDDYLNAPGETYSVKLTAAGEYGYYCEPHQGAGMVGKIIVQ
>CRv4_Au5.s3.g10800.t1
MPFQSNFQLIKASYKEFLRKVAAAHRGDGAGEAGPAHYYVERVYADASLDQSLARLQTQLLASVDVAELRAAYQARKLRAKLRANQIRQAFDDKVSRLNSYLGGASSSSAAGAVTAVAPATVGEAVAVAAQRDQQPAAVMMAASSGAMVTEAVQRSGGVVSTSAGGGAGASAMELETIFGSDGLLRRMVLLAVGSASRAYMTSLNTTSVEGGGHLAAALERPAGQALITVCNHVAALDDPLVVSALLPEAALQQPDKLRWTLCASDRCFRYAALVPLFRAAKVLPVVRGGGLAQPGMAAAESRLAAGDWVHIFPEGTRSPDGVSLGAVRKGVGRLVASVPEEAPPPLVVPFVHRGMEGVLPRGAVLPATGQKIDVMVGEPIPVADLLHAARAEAWPTDR…
>CRv4_Au5.s3.g10803.t1
MPDFAHTPAPYSGPSAEEVIALRKQYLSPSLFWHFKKPVMIVEGKMQYLFDEKGRRYLDAFAGIVTVSVGHCHPAVNEAINKQNALLQHTTTIYLNNQIAEYAKELTDRMPGNLKVVYFVNSGSEANDMAIMLARLYTGNWDMLCLRNAYHGMSIGTMGTCGQHTWKQPMPQGFGYHHALNPDPYRGPYGDDGARYAADMADLISGATPGRVAGFIAETIQGVGGTVPLATGYLPAVYKMVREAGGVCIADEVQTGFGRTGGHYWGFQRQGVIPDIVTMAKGIGNGLPLAAVVTTPEIAASMASRLHFNTYGGNPVCSAAGRAVLRVVDKEHRQAHCAAVGEHLLRRLRGLQAKHDIIGDVRGTGLMLGVELVKNRTTKEPAKAETAAVMESMKDMGVL…
>CRv4_Au5.s3.g10824.t1
MQTQLRGRGAGALPARASRSVFPRIVCQSQKTQEAPKKQQSYADKSRQGLGDIGDLLGPIGLTYSDGVSEFKVKPEDIQVDKSSNGVALGPISLSFGTELNDRNGVEASTSGRDAAAAASGLPSIHSMTTAEWRELYEKDGTNDLWMEDEFNAGSRLMGGRAVHKGGVYGFRTGEGPSAGDVPVHKIKIFDHYGNQEIDVEVPEDRYILWEAEDKGLELPYACRMGCCTACAVRVKEGEVHQPEALGISAELREMGYALMCVGYPTSDAVMETVSEDEIYELQFGKYFAQQALDPNSESIERDDYALSIANMDE
>CRv4_Au5.s3.g10835.t1
MSPAASDRPKVGVGVLLFKGENVLVGKRKGSHGSGTFALPGGHLELGESFEQCAIREVLEETGVQIRDPVFAYATNTVFNATTHYVTIFMRVDVEPGVEAKLMEPDKCEGWTWVPWDSIPEPMFEPLLALKESRYQPFG
>CRv4_Au5.s3.g10852.t1
MQTCMSPPGTSRSAALPQRTAAPNAARLGVTQNGLASPSGRGARCVPRAGDGRLSDVQRDLLAEIEARRKNQAQLLEKLNRLAAETAARTAATPASAAPPAPPAAAMPAPAPEVQVAVPMSVPMPAMASVASSPSSAWKSVPVSQPVRTAPPPPPPTPSVPIFELSLPLESEMYIEPAAPVAEAPEAEEEEPPAVEKPPPLAGPNVMNVVMVGAECAPWSKTGGLGDVMAALPKALVRRGHRVMVVVPRYENYDNAWETGIRKIYSVFNSNQEVGYFHAFVDGVDYVFVDHPTFHGRGKNIYGGERQEILFRCALLCKAALEAVWHVPCGGITYGDDNLCFIANDWHTALLPVYLQAHYRDYGKMTYARCAFVIHNMAHQGRGPFVESEHLELNEEYRE…
>CRv4_Au5.s3.g10853.t1
MPVTITSGRAPPLADTQAFLNGLEKHKEAGPAKDMFNWDAPLSVARAPGRLDVMGGIADYSGSLVLQMPISEAAHVALQLQGGASAPRVRVVSIPAPGEEAHRAPSFEAPMPALFPGGQPLEYEAARELFKADPSSSWAAYIAGCLLVLARDGPDAPALAARLAGSSVSVLVQSRVPEGKGVSSSAAVEVATMTALAGALGVAAEALPGRQLAILCQRVENLVVGAPCGIMDQMACTLGRQHSLLALLCQPAEVRGTVEMPPHVAVWGVDSGIRHSVGGSDYGSVRVGAFMGLRIASSDGQPSGPAGPPPARWGGYLARLSPSLLAQSVAAHLPDRVRGADFLQTYTTHYDTVTHVDPEKEYAVRQPASHPVHENFRVITFEQALKLPPGPEQLRLLGE…
>CRv4_Au5.s3.g10858.t1
MAAMMMRQKVAGAIAGERRSAVAPKMGRAATAPVVVASANASAFKGAAVTARVKRSTRAARVQSRRTAVLTQAKIGDSLAEFLVEATPDPKLRQLMMSMAEATRTIAHKVRTASCAGTACVNSFGDEQLAVDMVADKLLFEALKYSHVCKLACSEEVPEPVDMGGEGFCVAFDPLDGSSIVDTNFAVGTIFGVWPGDKLTNITGREQVAAGMGIYGPRTVFCIALKDAPGCHEFLLMDDGKWMHVKETTHIGEGKMFAPGNLRATFDNPAYERLINFYLGEKYTLRYTGGMVPDVFQIIVKEKGVFTNVTSPTTKAKLRILFEVAPLALLIEKAGGASSCDGKAVSALDIPILVCDQRTQICYGSIGEVRRFEEYMYGTSPRFSEKVAA
>CRv4_Au5.s3.g10871.t1
MRPKQQAQVTAAEDTASEPEPEPKPVDRKSRLRSFRVRTISSVLLIGGFIGIIWAGHVPLMFFILLLQFLVARELFRIAYIAEKSKRSLPLLRTQQWYFFFTAVFWLYLRFIKNNLLVEVTSDMTLARLFVWAVKHHSLISYSLYMAGFVGFVLSLKKGLYLHQFAHYAWTHMIILITTVPTSFFVSNVFSGILWYVLPAFLIVANDICAYLAGFFFGRTPLIKLSPKKTWEGFVGGFLGTLVIAFYLSAYMSKYKWMTCPRKDLTVFKGLDCTPDDVFIPATYTLADVNDLLPPAAAEYLRLAADRLPVPPALKAAAADFTFTVAPIQLHALSLAAFASIAAPFGGFFASGFKRAFHMKDFGDTIPGHGGVTDRFDCQIVMAVFAYTYYWSYISKPEV…
>CRv4_Au5.s3.g10896.t1
MMLKASPAARAAARPAARNVRMMAAPVSTQLSQDELKKQAAWKAVEYVKSGMVVGLGTGSTAAFAVDRIGQLLKEGKLQNIVGVPTSIRTYEQALSLGIPLATLDEQPKLDVAIDGADEVDPNLDVVKGRGGALLREKMVEMASAKFVCIVDDSKLVEGLGGSKLAMPVEIVQFCHKYTLQRLANLPEVKGCEAKLRMNGDKPYVTDNSNYIVDLYFQTPIKDSQAASKAILGLDGVVDHGLFLDMVDVCIIAGATGVTVQERPNPKKH
>CRv4_Au5.s3.g10912.t1
MALKMRVSQRQALGSQTFVCPHGSVVRKAVSSKARAVSRQAQVVRAQAVSTPVETKVANGVAASSAAGTGQNDPAGDISKTVLGIILGGGAGTRLYPLTKKRAKPAVPLGANYRLIDIPVSNCLNSNVTKIYCLTQFNSASLNRHLSQAYNSSVGGYNSRGFVEVLAASQSSANKSWFQGTADAVRQYMWLFEEAVREGVEDFLILSGDHLYRMDYRDFVRKHRNSGAAITIAALPCAEKEASAFGLMKIDEEGRVIEFAEKPKGEALTKMRVDTGILGVDPATAAAKPYIASMGIYVMSAKALRELLLNRMPGANDFGNEVIPGAKDAGFKVQAFAFDGYWEDIGTVEAFYNANLALTDPEKAQFSFYDKDAPIYTMSRFLPPSKVMDCDVNMSIIGD…
>CRv4_Au5.s3.g10923.t1
MVAYGEFRQGFNKDKTDTRLVSYGMRYLVETYISRQWTMEDVEMADAFYRTHMAPNHTAFPFPRALFEKFVRENNGFFPVKLETLPEGTCAHVRVPVYQITAVGEYAPLCTFLETILTMIWYPTSVATLSRRARDVVEASFARTSDGGVGSPLVQSKLHDFGFRGCTGVEQSIIGGCAHLLSFTGSDTMSAAFYAQFKLNGGRPVAMSIPATEHSVMTAWPTEAAAMNNMIDHFGTGIYACVMDSYDYAKALSEVLPSVSVHKLSKGGYLVLRPDSGDPTEAVLMALAAAEKVFGTTRNGKGFKVIPGCGVIQGDGIDLPTMEKIALAIEAAGYAADNVSYGMGGGLLQKVNRDTMSFATKLNHIIYEDGRAADIMKQPQTDTGKFSLPGVLAVKRVDG…
>CRv4_Au5.s3.g10935.t1
MLDINLFRTEKGGDPEIVRESQRRRFADVTLVDQVIALDAEWRQVRFQLDQLNKEFNALNKEIATVRKAGGNSDELQEKSKEMKKKIQETEEKEKDVIKTRDSKVVAIGNIVHDSVPVSQDEANNAIVKTFGECRPQVDPASGKKLYNHVDLVLLLGIVNMEAGQEVAGGRGYYLTHEGVLLNQALINAALQMAYKRGYAPVHTPFFMRQEIMAECAQLSQFDDELYKVTGEGDDKYLIATSEQTLCAMHRKGWFEKADLPTKYVGYSTCFRKEVGSHGRDTLGIFRIHQFEKVEQFVIASPEGNASWEAMEEMLANAEDFYQSLGLPYRVVNIVSGELNNAASKKYDLEAWFPASATFRELVSCSNCLDYQSRRLDVRLRTPKGAAAETTKSFVHMLN…
>CRv4_Au5.s3.g10936.t1
MAHTYQYPRPAVTVDAAIVARPSAAAPPQLLLIKRKNEPFKDCWALPGGFVDENESLDVAAGRELQEETSVDPASVSMTQVGAFGDPGRDPRGWTITVAYAALVPSTELGVKAADDAKDARWFDVSALPQLAFDHKLVVRSSLRHLAKQPAAQAIDGLSPVLESAATQLDGPWQTAESREPPKRTKGGV
>CRv4_Au5.s3.g10937.t1
MKEVFIALGGALLGGLLAGKLGKKKNSDASAAKKDAASAPKGYTYQWPRPAMTVDAIIVSQPTPASPAQLLLIRRKFDPFKDSWALPGGFVDAGEGLDVAAARELQEETSVDPASVSMTQVGAFADPGRDPRGWTVTVAYAALVPSTELGVKAADDAKDARWFDVSALPQLAFDHKLVVRSSLRHLAKQPAAQAIDGLPTLLRSAAAKLDGPWKADNK
>CRv4_Au5.s3.g10955.t1
MRRAIALGVGLALLGLLLPGSLAFKENEFKKCAQTSFCSRNRNVQQGANFEIVPASVTLNTATLTATLMNKQASKHLQLTLTAHADGFVRLLIDELPSVGRYQVPSDILVSGWETRKAAIKEESRSANGVVLVTGDTKLELNYAPFTLAVSVKGVPALQLNSRNLFNFEHRRPKQDSDPAGYWEETWMGHTDTKPKGPEAMSLDLVFPGFSHVYGIPERATSLSLKATNGNAPYGEPYRLYNLDVFEYLDDHPFGLYGSIPVMLAHKKGLTVGVYWNNAAEMFVDVVKGRDVGTQWIAESGVVDLFVFTGATGPAVLASYAKVAGTTALPQLFSLGYHQCRWNYKDEADVKAVDGGFDAHEIPYDVLWLDIEHTNGKRYLTWDSSLFPNPVAMQEDVAS…
>CRv4_Au5.s3.g10960.t1
MRAFRAGRGLAWRSSPSSPGIAQQCGLSVSTQRCRAASNGTPALAGPRRGALIVFEGIDRCGKSTQCSLLLESLQKQGVPAELWRFPDRTTLIGGLINEYLQKKASLNDAAVHMLFVANRHEKRDEMLRLLAGGTTLVLDRYSYSGVAYTAAKGVPHLGPDFCRSVESGLPAADLVVYLDLDPELSAARGGFGGERYEKLEFQKKARWRIAVLQWSERVRSQYGALADGRWLRLDASQPAELLQAQVAAAVQRVVEQAAAGEQLGQLWDYAPMPLPYAEPTA
>CRv4_Au5.s3.g10961.t1
MVERLKSQGVDAVMWRFPDRSTSIGAAINAYLSNQSQLDDAVIHMLFVANRLEKRDEMLRLLAGGTTLVLDRYSYSGVAYTAAKGVPHLSIDYCKSLEVVLPAADLVVHMSMSAEATAARGGYGEERYEKVEFQARVMEAFGQLRDERWAAIDAAGTIDAIHEQVAAVVEPVVRRTLQGAVLGRLWDFTPMELPAPRQEQPQSAAADEEDTVVQVQIAQPAAGKAEAVGVSQAPVLSS
>CRv4_Au5.s3.g10962.t1
MSSTIAASSPSSPCPYVTTVVRPGGIAVVTMAKEPVNSMDLAMWRGLDAALQSLEADPSVVAVVFTSGLRRDVFSAGNDLLELYAPKTSAARYAEFWVAQNAFLVRLHRSRLATVAAIRGACPAGGCAISLCSDVRIITPEGTMGLNEVQLGIPVPKFWGLLMGRVIGHKVAEGILLSGRMVGAAEAAQLGLVDDVVPAAQLMEEAMSRAAAAAKQPPAARAATKLLLREDFCKGWEAYYPTEPDFGWRFLSSPSTIKVLEGAMRRLSSNKDKQQQKPASKL
>CRv4_Au5.s3.g10986.t1
MANVDNYFSVLALFILFRETIEASIICGVLLQFLNRAKPALKKSVWWGVAGGVGVSIIFGIIFIAVYYTAQSNLFKGTNRDWFKGIISWIAAALITYLGFAMLRFVGWEEKWKRRLEAAVQQKIPIAKVEGEEAVGGAANDPAAVEGAAPASKDGANGSAAAAAGKSAALTSSPTLQTTSSSSGSRTRTSDEAILAKPAAAISPAAVASGSGPSIGSGPAPDVLLAARATTDLELGAGTDEKTGAALVVAADGEVEPANMITEDGRDMSPPTRKEHWNIFMLVFTTVVREGIESVVFLGGLGNVKLQAIPLAALVGITAGVLVGMFLYYSGRTVKHIKWLVIGMAVIIFFIAAGQVNIGTDSLMRAGMFGYCSPWLDERPWYMIPLYDWSACCADTDPT…
>CRv4_Au5.s3.g11014.t1
MSQLLSHFVRVPTFASPDQVLREARDKERELQNARAPTDVSGFLAPVGVWELKHLRKLSSLTSLTYYMHLVTPRRLQLMHGLDLVVTSRACDVRPYEHNRTAEECGADGDGMAVSFAEARQVYAELKRGTGGASGSGSNGAAAAPVAVAAGVSNIVALPRELPFVPLPGGATEGGEAGAEAAAGAAAAAAAAAGEGTGPGAQGQGAGGLQLPLASTEAIGRMLRSPAEVVSAKLAEAALAASAAAAASPLGAAAESFYAGLASLPIPLAGGLVGANNKAANTLLAPPNGAAASSSGGGGGSGGAAAASEVVGSSRGAQGADPADPGAPNTSGKATAASIAAMATAELRSRRLGGTGPAKTGGSGAASSGSSSGGIGAGGMAPVTAGGMRLSPAATAFSA…
>CRv4_Au5.s3.g11019.t1
MSSATRNVLSMLPALGRVGAQQAAGAAASLLFTRGYADLSSLKKTMLYDFHVAHGGKMVDFAGWALPIQYKDSIMDSTTHCRQNASLFDVSHMCGFSLKGKDAIQFLEGLVVGDIAGLKDGTGSLSAFTNEKGGIIDDTVITKVNGQHIYTVVNAGCRDKDLAHLSKHLAAAKSKGLDVAMTVHDDRSLLALQGPAAAEVVAGLVAPGVDLKAMYFSDFKPIDLGGIPCWVTRTGYTGEDGFEISVPNSHAVALAEKLTANKRVRMAGLGPRDSLRLEAGLCLYGNDLNEDLTPVEAGLAWTIGKRRREKFDFLGGDIIKKQLAEGVSKRRVGFVSTGAPARQHSVVSTPDGKVVGEITSGAFSPCLKKNIAMGYVDKDFAKAGTALKVEVRGKVNDAV…
>CRv4_Au5.s3.g11020.t1
MEASTSGSSTSSEVEALRAQISKLEATLKEKEKQLDTVYPYSRSYNKTAVNTILGAADGGKSLVGQTLRVGGWVKTGREAGAGAFCFLEVNDGSMFDSLQVMVSKEVAEEVGGLKTLVPTGTSVLVEGHLEATPEGTKQAVELKATKIVHVGPSDAATYPIAKKKTTYEFLREKMHLRPRSNTISAVARIRNALAFATHRFFQENGFLYVHTPIITASDCEGAGEMFQVTTLLGKMKEHEGAPAVSPAELEAAKAQVAAHGEEVKAAKAAAAANKEDKSLAAASKAAVDKLLKAKEELAKLEEGSRIVGGIKRLPDGTPDYKEDFFSKPAFLTVSGQLQGEFYACALSNIYTFGPTFRAEYSFTARHLAEFWMIEPEMAFCDLKDDMQCAEDYVRYCCK…
>CRv4_Au5.s3.g11021.t1
MWRLFLTAAGSAKSESSALAGFVRGFASQAAHNPAVFVDKNTKVICQGLTGKNGTFHTEQAIAYGTQMVGGVTPKKGGTSHLGLPVFNTVAEAKAATGCHATVIYVPPPFAAKAILEAVEAELELVVCITEGIPQHDMVRVKKAMQGQTKTRLIGPNCPGIIKPGECKIGIMPGYIHTPGKIGIVSRSGTLTYEAVFQTTNQGLGQSTVVGIGGDPFNGTNFVDCLERFVKDPQTEGIIMIGEIGGTAEEEAAEFIRKSGTKKPVVSFIAGLTAPPGRRMGHAGAIISGGKGTATDKIKALEEAGVTVTRSPAQMGVTMMRVMKERGLA
>CRv4_Au5.s3.g11023.t1
MALRAASSVRATASSGRASRRCAVVVRATAEPITESKNLEIMRKFSEQYAKRSGTYFCVDKSVTAVVIQGLAEHKDTLGAALCPCRHYDDKEAEAAQGYWNCPCVPMRERKECHCMLFLTEDNDFAGREQTITMDELKSGITGMQ
>CRv4_Au5.s3.g11028.t1
MLASRNMRASGARVAAAPAQRAILAARSGRRASVAAKAQKKEIMMWEALREAIDEEMERDPTVCVMGEDVGHYGGSYKCTLGLYKKYGDMRVLDTPICENGFMGMGVGAAMTGLRPIVEGMNMGFLLLAFNQISNNCGMLHYTSGGQFKTPLVIRGPGGVGRQLGAEHSQRLESYFQSIPGVQLVACSTVRNSKALLKAAIRSDNPIIFFEHVLLYNVKGEAGDKDEVACLERAEVVREGTDVSIFTYSRMRYVVMQAVSELVKQGYNPEVVDLISLKPFDMETIAKSVKKTRKVIIVEECMKTGGIGASLSAVIHESLFNELDHEVVRLSSQDVPTAYAYELEAATIVQSSQVVDAVHKIVGATAPVRA
>CRv4_Au5.s3.g11038.t1
MLVLLLYGISRYYGIQQAECEQRGCCWFPVAAAAAATAADGRGTESSASGRAAPATDTIGSHNDIPWCFHPNAVQTVYAVQSVEKVDPGGSGAVTRMLLQLRPGPAAVPELGPDFEMLQVELQQQTPQRLYLRVSPLPSPGGGGAGGAATGQAQSQPHQERWRVPEQLLPRPPPPTALPEAPLYQLQLPQPGDDFSLHVTRQPESQAEVAAEAGTEAAVEAAAAGQSLLEVLGGSCLVFKPQYLQLRMRVPQQTNLYGMGEATLPDGLRLRRDGVARALWNSDTPAAAVGVNLYGSHPVLYGIVPGSGGTAWGVFLANSNAMEFAAGSNDVTFRLTGGDLELWLLAGPTPEDVSRQYLQLVGAPALPPRWALGFHQSRYGYADVSELEAVVAGFEAAQL…
>CRv4_Au5.s3.g11041.t1
MLLANRVNAGAARRVSGRAAAPIAVRAGRRSLVCEARKVALLGAAGGIGQPLALLLKMNKFVTELALYDIANVVGVAADLSHCNTPVKVTGYTGPEELGACLKGADLIVIPAGVPRKPGMTRDDLFNTNAGIVKALVEAVAKHAPNAVLEIITNPVNSTVPIAVETLKLAGVYDPKKVIGVTSLDIVRANTFVSEAKGLDMKDVDVPVIGGHAGSTILPLLSQTTPPVTFTEAEKKAMTDKIANAGTVVVEAKAGKGSATLSMAYAAARMAESTLLGLNGEPNIYECAFVQSDVVADCPFFASKVLLGPNGVAKVMGLGELDAFEQAAMAAMLPQLKSEIQKGLDFVKSPPAPAS
>CRv4_Au5.s3.g11055.t1
MRNPDAAARSETGLDRQLGHLRRAARAVFPCGYVDKLLTNAGNKMRCGLAQWLLEQRAVVAPAGAPPVSGEYLTGAPVPLTSVEAYLRQQHAGLWLNRTVFKWPKPADFLRHADSHGIFLVLQTAADAPQGGGGGGGAGAAAGGQYPAVMLDGGALAAVFLEDAERGYGGSRPPGASDAAVLADSAAANVALAKAVAALARDAFPGATASDLTNVAPYGVHAVTDPAQRSAVARVYSAAEAACHVRRALVGWLAASRRLANVAPLSAPMSTLGESLRKEHAGLWAECDPSGGGRPPKLKDFLLQPESRGVFRVWAAGEAASSSSAGPAGGRQMVELQVDALWFAALRYTAPLSLLHPDLASWSAAAGPSSAAGSSTAPLESAAAAPGTSGRAALGRPPM…
>CRv4_Au5.s3.g11094.t1
MLQTRAPVVSRPAIGRAVRPAARPVVRTQALFGFGKTAEPETTSEFYQFQVKDIDGKNFKLSSLKDKAVLVVNLASACGFTPQYAELQDLQDKYGKQGFVVLGFPCNQFGAQEPGSNQTIKQFAKSNYGVTFPLMSKVDVNGPGAEPLFDWLKTQKGGLLTSDIKWNFSKFLINKEGDVVGRYGSTSSPLSLENDIKKAL
>CRv4_Au5.s3.g11119.t1
MALTCKLNATQASASRSQRAVCPRSRVAVQAVRASAQSHAEASSALPLGRRELLGLAAGIAMSSALPVLPVKADGEYATFLGYATPPTSYGGYGGNAKEAPRYTFEYPAGWKEEIPSKVEKGTQGVDGRVVNPRGKDQRAFVVTLARAGEDNKSFRLTDLDSTLSGFAGADYDLQDALSSATNRTTSSREVGGATFYDYDIESPDYHYLVAITVSNGKVFSLFVRSPTKSFPANEAKLRHIVETFRLL
>CRv4_Au5.s3.g11137.t1
MSALVLKPCAAVSIRGSSCRARQVAPRAPLAASTVRVALATLEAPARRLGNVACAAAAPAAEAPLSHVQQALAELAKPKDDPTRKHVCVQVAPAVRVAIAETLGLAPGATTPKQLAEGLRRLGFDEVFDTLFGADLTIMEEGSELLHRLTEHLEAHPHSDEPLPMFTSCCPGWIAMLEKSYPDLIPYVSSCKSPQMMLAAMVKSYLAEKKGIAPKDMVMVSIMPCTRKQSEADRDWFCVDADPTLRQLDHVITTVELGNIFKERGINLAELPEGEWDNPMGVGSGAGVLFGTTGGVMEAALRTAYELFTGTPLPRLSLSEVRGMDGIKETNITMVPAPGSKFEELLKHRAAARAEAAAHGTPGPLAWDGGAGFTSEDGRGGITLRVAVANGLGNAKKLI…
>CRv4_Au5.s3.g11146.t1
MIASSLQSSNASARGVSRRSANGRRVVRVSAAANGSNGHRTTFHRMIEENGCLLLPGVYDALSAKAAYKKGIKAGFVSGYAVSATVIGEPDLGLLTPPEMARKAGQISGAVPTLHIIADADTGGGNVLNVQRTIRQLITAGCKGCFLEDQAWPKRMGHMRNKEVIGMEEFAAKIAAAREAIGDHDFFLVARTDARGTSAKYGLEEAVKRANLYADAGADATFVEAPRSTEELAVIGRETKGLRVCNMLEGGVTPLHTPAELQALGFHMAVYPLAGLYAATRALLDVYGTLGIKGTTRDDMSGLAHFDEFNELIGLEEKIRTEERLSVRDASDKLHVRVRAPVKELN
>CRv4_Au5.s3.g11213.t1
MGKTGPMLLGGHRGMGENLASHDVDGQPLSVYPAYRENTIESFQQAAKCGVGFVEFDVQVTRDNVPIIWHDDDVVFGAADAPQRPMVKDLTLAELQALCGRGGNTSTSTAATASATAAGHGTGAADLPSSDSHFQQPHVLRGTSEDGSVVSTPRGGSDDGSGSMVDDCGATGGRPHSKLLRLFRDRSTRQAGTRYEPWACAADDSIPTLEAVFRAMPPEIGFDIEIKMTTGDDVVHTPAEEVDRMLSAILPVVDRLAGPQPPQDHFIDGPLLQPHPYRNAPASAAATASAAAAAAAAAAAAAAQQQQQPEQQQQPPMGRRIMFSSFDPDVCVELRRRQSRYPVYYLSGCGLYTHADARRTSIPAALSFAVEAGMRGVVMPASVLLKNMDTVASAGASRL…
>CRv4_Au5.s3.g11218.t1
MVPRAAAGPVARGVAARVAAAPAPVVAAKSSRRSSVVVRATAAPVAQVRTAEGLQVPHGPAAKLVNLMAPASEHAALKAACNKRIELSDRNACDVELLTVGAFSPLEGFMNKAEYDSVVANMRMTNGLLFGLPIVLDTDSEDIVPGDKLLLTYQGQDLAVMTVDSKFTPNKPLECLKCYGTSSLEHPAVQMVAMERGKYYIGGPIKGLALPTRVFPCASPADVRSTLPANQDVLAFQCRNPIHKAHYELFIRALDAPNVRNPGAVCLVHPTCGPTQDDDIPGVVRFRTYEVLKEETKNPRLRWAYLPYSMHMAGPREAIQHMIIRKNYGCTHFIIGRDMAGCKSSISGQDFYGAYDAQDLANKHAAELNMQTVASLNIAYTEEKGYVTADIAKAENLHV…
>CRv4_Au5.s3.g11226.t1
MALSVDHVNGREYKVKDIAEADFGRLEIDLAEAEMPGLMACRSEFGPAQPFKGAKITGSLHMTIQTAVLIETLTALGAEVRWCSCNIFSTQDHAAAAIARDSAAVFAWKGETLEEYWWCTEQALTWAGCDGPDLLVDDGGDATLLIHEGLKAEEQYAKDGTLPNPDSTDNAEFKIVLGLIRDSIQKDATKWTRMSKKVMGVSEETTTGVKRLYEMQANGSLLFPAINVNDSVTKSKFDNVYGCRHSLPDGIMRATDVMIAGKTAFIAGYGDVGKGCASAMKAAGARTIVSEIDPICALQAAMEGYQVQPLEDCLETADIFITTTGNKDIIMAEHMAKMKNNAIVGNIGHFDNEVDMAGLYAWPGIKRQNIKPQVDRFIFPDGHGVIVLAEGRLLNLGCA…
>CRv4_Au5.s3.g11232.t1
MNLSAPFIVQVPPFKKVLMDSMPYIDFLFGNEIEAAALAASEGWEGLSLEEVAKKMSRMPKANGCRPRVVVFTQGCDPTIVAVGGRVSRYPVMLLAKEELVDTNGAGDAFVGGFMSQLVCGKDIAECCRAGNYAANTVIQRSGCTFPAKPTFTWN
>CRv4_Au5.s3.g11242.t1
MPLAKLRNVVLEYAAIAIYVSAIYTSVVLLPSALALFYLFGATSPSAWLLLAAFLALTFTPLQLTTGALSERFVQFSVARAAAYFPTRVVVTDPEAFRTDRGYLFGFCPHSALPIALPIAFATTSPLLPKELRGRTHGLASSVCFSAPIVRQLYWWLGVRPATRQSISGLLRARKVAVLVPGGVQEVLNMEHGKEVAYLSSRTGFVRLAVQHGAPLVPVWAFGQTRAYSWFRPGPPLVPTWLVERISRAAGAVPIGMFGQYGTPMPHREPLTIVVGRPIPVPELAPGQLEPEPEVLAALLKRFTDDLQALYDKHKAQFGKGEELVIM
>CRv4_Au5.s3.g11259.t1
MTVNENGVLHMPIFEGSEKRIEVDFRLGPNVPANGLRSIPRETLDELMTLARCCIVSSRSNDKLDAYVLSESSLFVYPTKWILKTCGTTRLLNSVPRLLEVARSIGLEPRRCKYTRASFLFPENQPFPYTAFEHEVGFLDEHFGAMCANGGTAFMLGEPYQGLQWHVYLADDMLPLGPEFKPTYNFEVTMTDLGTEAAAQFFRDNNPKFVSAERTTKDTGIAELKPKAIIDDYVFEPCGYSMNGIDNTGLITIHVTPEAHQSYASVEFSGFGEDLMAPVQELLNKVVKIFAPGKVSVTMSVDKVDMDATGCWGNLTMCPAGFGLQGASSQVSPCGGKVAYYTLIEKLAAPGSPITPLHHAASFLSIVTSSDSEADNGSEPEREIVTTATA
>CRv4_Au5.s3.g11276.t1
MLHTLSSTRPARGGAYHAAGSGLMPLSMLRPRPASSGRLPLGPGPLPTTPSPLQRLHLYSDRTHDDPHHPSTVARFKGAAAADDGSSQQPIAPVSSSDAPAPGTAAPLAPVLLAVAVACAGSFAFGFNLSIINGPLETIATELGIAGNKALMGLVVSSTLAGAALGSLAGGGVADSLGRRVSFLLAAVPMVAGPLISAAAGDINTMAAGRFLTGAAIGLSSALVPTYISEVAPTRIRGTLGALNQLCICLGILGALLVNVVVPAAAWRTMFQAAAAPAALLGLGMLLGPESPRWLASKHRDAAARDAAVRLWGPSGPAELDLSRPAATAAASANAGRAAASDVDGGTPGTAVAQPGGLALLSGPAARPLLIGVLLFAFQQFAGINALVYFSSSVFRQAG…
>CRv4_Au5.s3.g11293.t1
MSGEPTPKKMKATYVHDRENFTKVYETLRDELLNDDCLSPAGSPQAQAAQEWFKEVNDYNVPGGKLNRGMAVYDVLASVKGPDGLSEDEVFKANALGWCIEWLQAFFLVADDIMDGSITRRGQPCWYKQPKVGMIACNDYILLECCIYSILKRHFRGHAAYAQLMDLFHETTFQTSHGQLLDLTTAPIGSVDLSKYTEDNYLRIVTYKTAYYSFYLPVACGMVLAGITDPAAFDLAKNICVEMGQYFQIQDDYLDCYGDPEVIGKIGTDIEDNKCSWLVCTALKIATEEQKEVIKANYGHKEAESVAAIKALYVELGIEQRFKDYEAASYAKLEGTISEQTLLPKAVFTSLLAKIYKRKK
>CRv4_Au5.s3.g11300.t1
MQSSRVAGPSRPAAVPRCVAVRPVRKLAIVRADAAPETPKALGTEKTGPNFKALRDINQIMQTLPHRYPFLLVDRVVEWEKEKYAVGYKCVTINDNFFPGHFPERPIMPGVLQVEAMAQLAGLVMLDPEDTAAKGLFFFGGIEGCRFRKPVVPGDVLMMRAEVTKYNKRFGIVKVAATGYVGADLVVEAELTLAMGKP
>CRv4_Au5.s3.g11319.t1
MELKPDVAQKLRHAEAVCFDVDSTFCEDESIDELAAYLGVGEQVAALTAKAMGGTVEFKEALRTRLGVMHPSRQAVDKFLADHPHRVTKGIPELVALLKARGQEVFLVSGGFRQIIHPLAESLGIPLSHVFANSILFDHDGRYAGFDESEFTCRSGGKPAAIRHIKEKYGYEEVVMVGDGATDAEARSEGAASLFIGYGGVVVRPTVAAQADWYIMDIQQMIDVLKAAPPANAH
>CRv4_Au5.s3.g11329.t1
MQALRAQTSRSPQTYSNTCPILSRELTRCTTRRPGCVPTRATVVPCAQRQSQQGVEASRAVTSATPDAPEPVVERVSNSSGSRKAFAKAFTSLLGLQLAKPEDLDPDTLRNPPFPRYTPALSELSVQQLRPYFLNRTYTDTDVGYLAFFSAMHLVALVGGPLTYSPECLQLCLAGYVVTGMLGISMSYHRQLSHKSFRCVKPLEYLLAYCGALAFEGDPIEWSKMHRWHHLHSDTPADRHSPRDGLWHSHMGWLFDEALNSTRRDAQGNMKDSLSPPWFYKESPAFYGWLRDTYMYHQIGQGVFFYLWGGVPYLIWGFVIRVLFTMHMTWLVNSAVHIWGEQRYQSDDSSRNNWLVGLLVFGDGHHNNHHAFEYSAAHGLEWWEVDMSYYMIRILELTG…
>CRv4_Au5.s3.g11336.t1
MAIEKMHISYNEIHQAIADCVEGKDVYESFKPTLIIAIGSGGFIPARMLRTFLKAKCGKSLPIQTIGLVLYDDNLDKYDPDTAVVRKTQWLNYSHGEGTGISLQGHNILIVDEVDDTRKTLSYAVAELTKDAEKQRHEYEARRKEGEPEWQQPKLGVFVVHNKIKDKKGSLPADVLESRYFKCMDVPDNWIVYPWDALDIETHQQRADERRAGERAAKKAKVDGDQ
>CRv4_Au5.s3.g11339.t1
MLAKFLSALLYLLSAVAVSSFSTDVDEERLIGWKGETYSQRAAEEWSLTVTESEGIPWIETVSWNPRVFIYHNFLSDAECRHIKRTAAPMMKRSSVVGTNGSSVLDTIRTSYGTFIRRRHDPVVERVLRRVAAWTKAPPENQEDLQVLRYGPGQKYGAHMDSLIDDSPRMATVLLYLHDTEYGGETAFPDSGHWLDPSLAQSMGPFSECAQGHVAFRPKKGDALMFWSIKPDGTHDPLSLHTGCPVVTGVKWTATSWVHSMPYNYDDYFKCKKNPAYMESHCGRSCGACEPCAGADDLACINRNREKLGFMVYDNEELDA
>CRv4_Au5.s3.g11341.t1
MPQLNRLTRLRQPWVLPAASSALQLQQLNNLETTAHAGIIGERSLATKATATSSSRSESWSVPASILAAGAALLGSALLTPGQASAKKELAILPGSKPSPAAAPAKPAGAAASEPAAAKGPAKDEKGRPIYTREEVAKHKTPKDRVWVTYKEGVYDITEFIEMHPGGAAKIMLAAGGSVEPFWGLYQQHKKPEVFAILEPYRIGTLEGGAAAAAAASAALKDPYAGDPARHPVLIPRTQKPFNGETPGSLLAASPVTPTDVFFVRNHLPVPAVDTEHYRLQVTGEGARSLELSLSELQSRFRKHHVTATIQCSGNRRNEMSQVKPVKGLEWDQGAIGTAVWGGVRLRDVLKAAGLSEDDPAVRHIHFEGLDKDPATGDVYGASIPLSRALSPECDVLLA…
>CRv4_Au5.s3.g11354.t1
MPSSQGLCMSSAPASAVRKQTQGTSFKNAPKAEEHKECAAAIILTPKQTYDHIVATGVAKTTLPLSKQVTQGVLAGFYISFSFMLCMTVGGQIPTIQANYPGIYNFILGSVGFPLGLTVIMVVGADLFTSSCMYMMTAWIEGRVATYYVLKNWFLSWWCNLAGCLIMAQLVVWAELFHGKESFPIFLAHKKTSYPFGATVVKGIICNWLVNLAVWMANSARDVTGKAVGVYLPVSAFVTLGTEHVIANQFELSLAKMLGSGMSLHTIIRDNWVPATIGNIIGGAFFVGTLYAGVYGTLYERMWLRCLQVYVWVLPRAVRERIHAARTAVYEKLFGWVDWDYITTAPADVIRETAGQDLNEDSPGPHDHAAIAKAGVSSAGGNSDNAGALDRKTGASTGA…
>CRv4_Au5.s31.g11378.t1
MLASQKLAHRAGLEERRACIGPHVSRSQQRVVGRVGKLAPHVSGAPANAIRQTSVVRKLLRVAAAASTVSGAAAEKPTGVRGAHWQVHKFGGTCMASADRIRATAELMASTVGPDSSTCVVVSAMGNHPTSPIKVTDLILNMIKKASRQDAAFLVDLAALQEKHVDTAKLLLGQSPELTQFVSSLMDDITNLKAMLQAMSIAGMSTDAFSDFVVGHGELWSGRLFALCCKQLGADVEFMDTRDVLVVTPTSDGASVDLDEAVSNGRMDAWFKAKGNKKLIVATGFIARSREGTATTLKRNGSDFSATIMGALLRCRHITIWTDVDGVYSADPRKVPEAVCLPSMTYHEAWELSYFGANVLHPRTTLPAMKYHIPITIRNFFNQSAPGTRISDVASDAEV…
>CRv4_Au5.s31.g11379.t1
MQSIRGLNARNVRAGSRSRPSNLSVCAAQNGKVNVLVVGSGGREHSLAWKLSQSPLCNHLFCAPGNPGTETEPKVTNVAVNVTKHKDVVQFCKEKDVGLVVVGPEVPLVAGLADDLQAAGVPTWGPSARAAALEGSKAFMKDVCRKYDIPTAAYEKFTDPARAKAFIKQLGAPIVVKASGLAAGKGVVVARTVEEAYQAVDDMLVRKVFGGAGDELVIEEFLDGEEVSFFALVDGEAAVPLVSAQDHKAVGDGDTGPNTGGMGAYSPAPAMNDTIHKQVMDEIIYRTARGMAAEGAPFRGTLFAGLMIKDGKAKLLEHNVRFGDPECQGLMALCASDLTDAMLAATRGRLGDVRLDWRPEAALTVVLAARGYPGEYPKGSVIRGLEGVTGAKVFHAGTA…
>CRv4_Au5.s31.g11386.t1
MVQALCSAGAARRGGRQAYSFLASLLSQQRGFAAAAEKDVVVVGGGPGGYVAAIKAAQLGLSVACVEGRGALGGTCLNVGCIPSKALLNSSHMYMEAKQHFGSYGIKMDGLSYDFAAVQAQKDGVVSGLTKGIEGLFKKNKVEYVKGWGKLVSPHEVEVAAADGSSSRLRAKNILLATGSEVTPLPGVPIDEEKIVSSTGALALKSVPGEMVVIGGGYIGLEMGSVYQRLGAKVTVVEFLDNIVPSMDAEVRRSFMRTLEKQGLKFKMGTKVTKGEVVGGRVHLTLEPAKGGAAEKMECDVCLVSIGRRPYSKGLGLEAVGVNTDNRGRVIVDAHFRTNVPSVYAIGDLVPGPMLAHKAEEDGVAAVEIMAGKHGHVNYATVPSICYTHPEVASVGLTE…
>CRv4_Au5.s33.g11425.t1
MSSEVRGQPPHPHLHQHERTQQQQQQQQQQQQQQQQQQQQQHHRQEQQQQQGAVGFSVDAASVAAATPAAAAAASVSAATAAALLRSPLQASGRRDPTDPSPRSGSLSWDDYFMALAFLSAERSKDPNKQVGAVIVNADNVILGIGYNGFPRGCCDSDLPWAKVCPRGSGNGLTAASTATTAASTAASTDNDPLGTKYPYVVHAEANALLNKNAASVAGARVYVTMFPCNECAKLLIQAGITEVVYHEDKPPPPLVAVVSDADVGYLASLRLLRLAGVRLRQHRLAAPITVPSAAALAS
>CRv4_Au5.s33.g11431.t1
MNMLLQQQKLAAGCKQRSVAQPSRGCVAAHTGLRSGRVASRQRSVTTAVMTPPAKSESSSPVYTTMSLDGQNLKTAKPRLVVLGSGWGAMSFLKALPTSISSTYELIVVSPRNYFLYTPLLPAVATGTMEERSIVEPVRNFIVGKGEFYEALCKDIDPVAKELVCCFPEDAGLDSACFKMSYDVLVMAVGSVNNTFGIKGVDQYCFYFKSIEDANRLRSRVSECFERAALPATPEEERKKLLTFVVVGGGPTGVEVAAELYDMIEEDLSKLYPNLVKDVSIQVVELMDHVLSTYDRAISLYTAEQFKRAGIKLVLNSRVASVEDGVVRVVNKANESVDIKFGACVWATGIAMNPLVRQLQEKLPGQSHFRSVLTDDCMRVKGSDGSIWALGDAATIDQP…
>CRv4_Au5.s4.g11555.t1
MASPAADLAPGSTSYPAAWPCIRSPRLSRSAIVAAASGNGAGAPGKVGVVIVDHGSRKRASNDMLHEFGALYGQLTGHDLVEVAHMEIAEPTIAQAVGRCAERGASTVVIAPYFLSRGRHIQEDIPALVREAQAEHPGLKCIIADPIGIDPLMVQLISNRVASALEGGDEAGKAAVAVASGAGAGAGQA
>CRv4_Au5.s4.g11563.t1
MATAGKIHVANPVVDLDGDEMTRVIWQQIKDKLILPYLDLKIVYFDLGLPNRDKTNDKVTEEAAYAIKEHNVGIKCATITPDEARVKEFGLKKMWKSPNGTIRNILNGTVFREPIVISNIPRLVPGWTKPIVVGRHAFGDQYKATDFVVDGPGKLEMIFTPAAGGAPRKFEVYSFEGPGVAMGMYNTEESIRGFASSCFEYALQKRWPLYLSTKNTILKSYDGRFLQIFAETYETQYKKQYEEAGIWYEHRLIDDMVAQGLKSSGGFVWACKNYDGDVQSDIVAQGYGSLGLMTSVLVTPDGKTVEAEAAHGTVTRHWREYQKGKPTSTNPVASIFAWTRGLAHRGKLDNNAELIQWTHDLEAAVIETIEQGHMTKDLAICVHGTTKVTPDQYLNTEPF…
>CRv4_Au5.s4.g11573.t1
MAEDILKLWQRQYHLPREDSDKRTLRERVHLYRPPRSDLGGIAVAVTVIALWATLFVYGLWFVKLPWALKVGETATSWATIAAVFFSLEFLYTGLFITTHDAMHGTIALRNRRLNDFLGQLAISLYAWFDYSVLHRKHWEHHNHTGEPRVDPDFHRGNPNLAVWFAQFMVSYMTLSQFLKIAVWSNLLLLAGAPLANQLLFMTAAPILSAFRLFYYGTYVPHHPEKGHTGAMPWQVSRTSSASRLQSFLTCYHFDLHWEHHRWPYAPWWELPKCRQIARGAALAPGPLPVPAAAAATAATAAAAAAATGSPAPASRAGSASSASAAASGFGSGHSGSVAAQPLSSLPLLSEGVKGLVEGAMELVAGGSSSGGGGEGGKPGAGEHGLLQRQRQLAPVGVMA
>CRv4_Au5.s4.g11595.t1
MSGSLSELHAIPGVCVNPDPSTQNFVFQQTMFRIRDPAKSLDFYTRVLGMRLLAKLDFPDMKFSLYFLGYEDVKDIPEDPADRTVWMFRRKACLELTHNWGTESDPNFAGYHSGNSDPRGFGHIGFSVPDVYAACKRFEELGVEFQKKPDDGKMKGIAFIKDPDGYWIEILNADNARQFVGWGK
>CRv4_Au5.s4.g11600.t1
MGLGTWSWGNRFLWGYDETMDAELQEVFNLVVRNGINVFDTADSYGTGRLNGKSELLLGQFVREYPGSDRVRNNLHIATKFAAYPWRVLPGNVVAACKGSLRRLGLEQLSVGQLHWSTANYQPLQELALQAGLADCYEQGLVRAVGVSNYGPKQLEKIYAYLDKRGVPLSSAQIQFSLLSWGTAQQDLKSLCDDLGITVIAYSPLALGILTGKYSVEEGRLPEGPRGTLFKQLLPEVAPLVELVGEVARERGKTPSQVAINWCIAKGTVPIPGAKDLVQAKENLGALGWRLSEGEVAELDATAASLKKSMVQNIFQTQ
>CRv4_Au5.s4.g11616.t1
MQVAHRQTAGSCLRSRSATSGRRAVPVASQRPSSARPGPLCKAAEQLVGVGSSVPETFLTNDDLAKLVDTNDEWIVTRTGIKKRHVLGKGETLVQHAVISSKRALEMAGVDAKDVDLVLFATSSPDDVFGSACQVQAAVGASKAVAFDLTAACSGFVLAMVTASQYIRAGTFKTVLVVGGDALSRFVDWRDRGTCILFGDGCGAVLMRANPDPAAPPAILGMDMGSDGAGHKHLHCMFSGGGLKPHGEGEGPSSHASYANIHMAGQDVFKFAVRTVPAVIDSALANANLPKESVDWLVMHQANQRILDAAAQRLGLPSERVVSNLASYGNTSAASIPLALDEAVRGGRIQPGDKLAMAGFGAGLTWAGAIVRWG
>CRv4_Au5.s4.g11710.t1
MRSQLLRFLTRAPAGFSQEGLQALRAGLTSGEASGLLQSSAFGRQNESAAPRGLGFGKMALPLSFQGHLMSTLASANGDDKKEPTTGALAQQPQVPNALAALPPRGTRTMGSHAAGHQTAKEFYMEHIGKRHPFHVLPPSPWPMLAGWGTYVSCLGMAAWFHNMPTGGALMAFGMANIAWTAITWWRDCAIEGDMGMHTEVVRKNFISGMWAFIVSEALLFVGLLWACLHLGMSPSVALQMQWPPVGIEPIGWDKRALVMSAVLAASYYSANVAMVAKDPKVVMGALATTIGLGAMFLADQYLEYNETPFTITDSPYGTTFFVTTGFHGMHVLLGSLYLTAALMMYKRTHNAGAALKSSILYWHFVDIVWIAVYGIIYVGQY
>CRv4_Au5.s4.g11737.t1
MARTGALLLAALALAGCAQACIYKFGTSPDSKATHTGDHWDHSLNGENWEGKDGAGNPWVCKTGRKQSPINVPQYHVLDGKGSKIATGLQTQWSYPDLMSNGSSVQVINNGHTIQVQWTYDYAGHATIAIPAMRNQSNRIVDVLEMRPNDASDRVTAVPTQFHFHSTSEHLLAGKIFPLELHIVHKVTDKLEACKGGCFSVTGILFQLDNGPDNELLEPIFANMPTREGTFTNLPAGTTIKLGELLPSDRDYVTYEGSLTTPPCSEGLLWHVMTQPQRISFGQWNRYRLAVGEKECNSTETDAAHADAGHHHHHHRRLLHNHAHLEEVPAATSEPKHYFRRVMEETENPDAYTCTTVAFGQNFRNAQYANGRTIKLARYE
>CRv4_Au5.s4.g11738.t1
MARTGALLLVALALAGCAQACIYKFGTSPDSKATVSGDHWDHGLNGENWEGKDGAGNAWVCKTGRKQSPINVPQYQVLDGKGSKIANGLQTQWSYPDLMSNGTSVQVINNGHTIQVQWTYNYAGHATIAIPAMHNQTNRIVDVLEMRPNDAADRVTAVPTQFHFHSTSEHLLAGKIYPLELHIVHQVTEKLEACKGGCFSVTGILFQLDNGPDNELLEPIFANMPSREGTFSNLPAGTTIKLGELLPSDRDYVTYEGSLTTPPCSEGLLWHVMTQPQRISFGQWNRYRLAVGLKECNSTETAADAGHHHHHRRLLHNHAHLEEVPAATSEPKHYFRRVMLAESANPDAYTCKAVAFGQNFRNPQYANGRTIKLARYH
>CRv4_Au5.s4.g11753.t1
MSTAVHLNVQGPDAAKLIELASCAGACNKDTPKVEPADLASYMRSLPAWRLNADSTAISRSFVAKNFMAAIAFFNKVAEVAEAQGHHPDLHLRNFREVEVVVSTHAVGGITLPDLALAAMIDGIEVDYSPKWAKAEVERMAAAGADGGSS
>CRv4_Au5.s4.g11759.t1
MTIPVWLDCDPGHDDATAILLAGHTPGLRLLGVSTIGGNQTLAKVTKNALDVLDAIGLSHIDVVAGQPRPLMRSPMLCPEIHGDSGLDGPAGGRLLPRSGRQPRPGKAVNVMFEAIAAAHAELAKEHEARAAGGECGGGTGEAECPRVRLVCTGALTNAALLLALYPEAAQWVELVLMGGAMGVGNTGPVMEFNIQTDPEAANMVFESGVPLTMVPLEVTHTVLATPGVLADIGGAGSSTSDSSITSGKGTCNGTSPQGTTDPAAPAAAPSSSSPDPASAAAAATAATATASLRGAASTAALAAAGGGAAAVAAALAATASSPFRHAIQELLLFFADTYKRVFKFDDPPLHDPVAVAYVIAPQLFECRRMRVDVETCSPLSAGQTVCDMWGQSPLPANA…
>CRv4_Au5.s4.g11760.t1
MLLLCRWCEHDPLEIWRTVLQCISQAWESAQQHVVSSGRPPLRMLSLGITNQRETTVVWSRSTGQPLHNAIVWLDNRTSELCEHLSRVFGGVDAFRSVTGLPISPYFSATKYLWMLENIPQVAAAVESGDAAVGTIDSWLIWQLTGGADGGVHVTDVTNASRMLLMDLDALDWHEPTLAAFRCPRAVLPRIVSNSEVYGTISASAATALHSHGHAQYHQHYAPPLPAAAHAHGLAPAGEVLAAADSGSTGSLPGLTGMASGGFRAAAAANGNGNGHGMHGMHGSAGHLLPHAMPHPGLRHPLSPLEGVPIAGSLGDQMAAVLGQRCRPGEAKNTYGTGCFMLLNTGQRRIASNHGLLTTVAFKLGPDKPANYALEGSVAVAGLGVSWLRDNLGLIGSAA…
>CRv4_Au5.s4.g11800.t1
MNSTHPYYMPMLHKHLRLQGTELPHFITSVGNCCPSRTVVLTGRHCHNNNLTANDPPHGGYAGFKTKKLDKSYLPLWLQAAGYQTYWVGKALNGFSTFMADKYGCLPGWDHLMPSVGPPTQADLDEFQASAGLAQRPPVYLKYYYTNCQYHERKVGLPDDNLFERAHSLIEDSVDSGNPFFLKLAVSAPHDGPVDGLPRIADRYLSAFPGLKVPRGPNYGKPIDDRFGMSKQRPLWWDSADSDIRYRARAQSMLAIDEHLDKLVTKLECLGILNNTYIIYTSDNGFKLGQHNIPQEKWTYYEEDVALPFFIRGPGVPRGAYANTVQAAMVDVTATILNLAGAAPPANADPVDGAPLPFDLLRTLHSQPNSPFYSYKGAYWNAAPGTVDMLAPPATDAAT…
>CRv4_Au5.s4.g11803.t1
MASGPPVEGNRTLVITSQRGQVYPFEAAAKLEAYQTGAKPAPQQLHALHAQHHNGHAAPTKGSSFASPYFGSNSFTSKKQQKSGRAGGGQPPRASRAGKWDEVKLWQLGYRQELQRKFSMLNNLAIGTSVLSFFAINDTYGTQGMAYGGPVSAVWGWLICSAFSLCVALCLAELLSALPTSGGIYYWSFSLAPRRHRTLVCWMAGWLNLLGQVAFTAGLEYTLAQGVATAVFMQTHGAAGAANSDGVRLSRTAILGVLAAMLLTHAALNSLSIHLTSFLATTSFFWHVIATLALCISMMLIAPKLNSPDFVFTMWTPNSQVHGITSPAYIFLLGLLMSQWTIMGYDAAIHVVEETIDAENAGARALVGSVVVTSGVGFCLIICLTFALQNEANLLNPHN…
>CRv4_Au5.s4.g11810.t1
MILVDDMDYMLNASHPYYLPMLHKHMRLQGTEFPHFITSVGNCCPSRTSLLTGRHCHNTNLTANDPPHGSYIGFKTKKLDKSYLPLWLQDAGYRTYQLGKVLNGFKGSVTTQYGCLPGWDHSMPPIEPQSDAAAARADALLQQKPPVYLSFYYTDCQYVEEVEGEPDINLFNRAFNWMEESVDAGVPFFLYLASANPHDGPVDGMPRVEAKFANAMPGLKVPRGPNYGVPTDPRFGMSKTKPLWWDPAWTDKHYRMRALSMLTIDEQIDRLVTKLECLGILNNTYIFFSSDNGFKLGQHNIPSEKFTYFEEDVALPFFVRGPGVPRGAYANTVQTAMVDITATILNLAGGSIPPGAPPVDGGAIPLDLLQTLHPQPNSPFYNYTGPYWNAAAGTVDMFA…
>CRv4_Au5.s4.g11811.t1
MTPRPLLLALLATPSPAVTPRSDKPNFIVIITDDQDDILNSTHPYYMPALNRHLAAGGTRLSNFLVSTGVCCPARVSALSGRYAHCHNVTGNWYPSGAFRKFYERKVEDNWLPGWLQAAGYDTYLVGKFLNAYMTTAAFMGADSGDYYPRGWTIFDALTQGTYAYWNSCFAYNGGSDKCFPKQYQTDIIRDKALSYLRTATAKKDTPFFMYIAPPAPHVELTNNGWQPPSPAARHANLYANDKIRMPKGANFGVPNPNIPMEVDDMTPDFVAQLEFHYLQRLRSLRAVDEMLDAVVNQLSASGQLDNTYVLYTSDNGLHLGQFSLGDGKATAVEEDSRVPFYIRGPGIPAGQVIPTQTNLIDMAPTLLSLAGLPVTNDVDGIPFPVGNSLITAHVNALV…
>CRv4_Au5.s4.g11825.t1
MGPTPSWAARGRAAVALSASLFFQLLVLAGCATFAFFMFVTPTRWYLVREAEFIAWRNSLILPYTFINGTTGRTTPLLSGTISWLVIWQWTTTLAAALGAAGLLWVASLNSASSPTPNKSSSSKRPQACWSLGRAIKRALTRARRVLHHPLPPRGMWRTLFGPGGLSVLDMFLILFWFAIHAMWMYEMTMRVLDNRRANPPPPRRATHSRTLLQSQSQSQSAYPPPPKSANSTKAAAPPPPTVRRLKPLPEVVQDSVAKYSGWVGRLDLLLLFFPLPRCNFLHWLLGSDFPTLVKYHRWLGHGTMLINSIHGIVYMGMWANAGTLTTMLNWGMGAGVNRLAGLISLCGGWLLWITCIPIIRRRFFNVFYISHILGAIIFLLFGFMHRKDVATWVMPGIF…
>CRv4_Au5.s4.g11844.t1
MEGTGEGISECELVSWSVKVGDAVAAFDKLCDVQSDKASIEITSRYSGRVVALHHPTGAVVKSDKASIEITSRYSGRVVALHHPTGAVVKVGAPLLDLEVSDDTAVAPEHLAAVAGAGGGAGGAAVAGGAAVAERAATSSTSTTSATATITAAVVAGDAPSGGPPAAAVVAGVTVTPPQVPLTAQVQQQQQPVAMTTAATPSSQPPLPPPGGAVHASPAVRALARELGIELSAVTGTGPGGRVTKNDVLRTKDDLAAAAAAAAGGGGSAAAAASDAGSGGNGGAAASGSRNAHPHGQPHNHHNHHQRSLAEAVAQYQRLTAAAGGVAAGGAAAAAVDGSQPTVVPLRGYRRAMVKSMTAAAALPNFHFHDEVLVDRLLAVRAALKNDPGLKAQGVRLTL…
>CRv4_Au5.s4.g11849.t1
MASENHFLVGFCSPDLTLGDFGNELGRFTPCFVDVAVLGTAEVFCILVCVLHLLRTFARCGRKHRYTGVALRVQVVTLALCCAGLLISLAQLNARLGAAAAAAWGGLGLLGQQSSAAATHNTLTLGEGSDVPQPAATAAAAEVAAALSRRALRAMLGAWVRGSGGDDGGGGGGDATAPVAPYEWAGFALSSGRWLALVALFSRELVPPGHVVLPARWLVRFALVLAASAELVKARFLIFAPPPAPSGSGSGPGSGSGSNPDSDPDSGSDGDGAAAFSAQYFFYMYVSYLSVQLALAGLALVWRPGKATGLVEAEDDQHGGGYLPLAGSEPDTSAAAATATAAAAAATVCPEARAGIWSSLTFAWMAPLIQKGYRQPLTTNDIWQLPPDDRVDAVEPAFQ…
>CRv4_Au5.s4.g11857.t1
MAQDWSLKGAGAANLVYAYCGEDERLRGHVLRVRKGTAHAASEVDIALWEGVLVHKPGDAAGRELSYVADVMAPLLGRQYVFPGIPCRLPVDLREAMGPGGSSDHFPALLQPDHTLLQAAALSARGWAGVGPAVCLEVKPKWGLHPSEVPRGPEEEGGGGGAEGGGAEEAGEQEPLRRRYPRFMLHMLHKHIQDGLPLSYYNPLDLFSGQPDRMAAALARLLEAPSNNLRVFKDGVQLYGGTGTAGGGSDGIESAPPAPADAGAEAGATPVTATVGFGGIDRTGPRWLALRSLAASLQGFVAAGGAGAAATAQAAAAEGTSAVSAEDAEAEAVLGAVARLAAAALRQEGVLQRLHAVQALDSQGPAGALSLLHQLEAAVKTGSWPSTAAGNEPTAGAPA…
>CRv4_Au5.s4.g11868.t1
MAGDFAAFEAKMKAANLSQAAIAAFKKNYDQLVAGVTGMVAEADISSADGLPYLTSLPHVSPADAKSLLSATAVLKLNGGLGTSMGLEKAKSLLVVKDGKTFLDLICEQVKHMRATYGSQVVFTLMNSFSTSDDTRAFLAAAHPDLLQEPLIELLQNKSPKVDAASLSPASYPAQPDMEWCPPGHGDIYPSLLGSGMLDALAGQGIKYLFVSNSDNLGATLDLDLLHYFATSNKAFLMEVCERTAADKKGGHLCVRKADGRLMLRESAMCPDADKKAFEDIAKHKYFNTNNLWVSLEALAATLKSSGGALDLPLIKNKKTVNPRDAASPPVFQLETAMGSAIECFDSAGAIVVPRSRFAPVKTCSDLFVLRSDAYVIAEDSTVAVAPALKGAIPLVKLD…
>CRv4_Au5.s41.g11876.t1
MASLLAGKPLMGGLKLQRSAKMAVPAVAVPRVATAAAARVGLKGGLGERPFAPKPVEKKPLAPAPQAASGDAPAPEPKKFLGFEPITWAKILPLGAMFFCILFNYTILRDTKDVLVVTAPGSGAEIIPFLKTWVNLPMAIGFTIMYSALSNRLSSEALFYTCIIPFIAFFGAFAALMYPMRDALHPTEFCQNLLEQMGPRFAGPIAILRNWTFCLFYVMAELWGSVVVSVLFWGFANQITTVEEASQFYPLFGLGANVALIFSGQAVKYFSQVRAGLPPDVDGWGVSLNGLMGMVVIGGLLIIGIYFSLQRLVVPKLKSLREGKKKKNKTKMSVGESFAFLAQSSYIRDMATLVVAYGISINLVEVTWKGKLKAQFPNPNDYSSFMGEFSTATGTVTFT…
>CRv4_Au5.s41.g11880.t1
MMLKAGNRPVALRSGRSATVSPISRVVSRPQQLQRRICTAAAGQKDAFPSGPYPIPPGPVGHFYRETEKWPTSETVRLQPHDLNEVDYVDLVVAGAGPAGVAVASRVAAAGFSVCVVDPEPLAHWPNNYGVWLDEFQAMGLEDCLHVIWPKAKVWLNSEADGEKFLNRPFGRVDRPKLKRILLERCVASGVTFLDAKVSGVSHGGGCSAVKLADGREIRGSLVLDATGHSRRLVQYDKKFDPGFQGAYGIVAEVESHPFALDTMLFMDWRDDHTQAPGLEAMRAANTALPTFLYAMPFTKNLVFLEETSLVSRPAVDFPELKDRLQARLQHLGIKVTNVLEEEYCLIPMGGVLPKHPQRVLAIGGTAGMVHPSTGFMISRMMGAAPTVADTIVDQLSRP…
>CRv4_Au5.s44.g11901.t1
MASSSTWEGTGLSQDDFMQRDECLVVDEQDRLLGTANKYDCHRFEAAKGQPCGRLHRAFSVFLFSPDGRLLLQQRAASKVTFPGVWTNTCCSHPLAGQAPDEVDLPAAVASGQVPGIKAAAVRKLQHELGIPPEQVTFPGVWTNTCCSHPLAGQAPDEVDLPAAVASGQVPGIKAAAVRKLQHELGIPPEQVPASSFSFLTRLHYCAADTATHGPAAEWGEHEVDYVLFVRPQQPVSLQPNPDEVDATRYVTLPELQSMMADPGLSWSPWFRILATQPAFLPAWWGDLEAALAPGGSRLSDWGTIHRVM
>CRv4_Au5.s44.g11903.t1
MSATLTFWDRNPPYAAVALARLANVPVAATHDPKATKETVPTLSVSGETFTGTMILKYIARASAQRDELYGGSDAVAACQVDQWLDQAGAITPAALEAQAAALNDFLQLRTFLVGYSLTLADLAVWGALQASPLWNKVRGSGKVPHLARWFAFCSEVPQVRAATEELAALAGKKPGAPAAGGADKKGAGAGAAGDNKKGGAAGGAAGAAAGGAEGGDAGGSFDIGLPGAEEGKVVTRFPPEPSGYLHIGHAKAALLNQYFADMYKGKLLVRFDDTNPSKEKDEFVENIMKDIADLGLRYEKLTYTSDYFPQLLDLGERMIRAGLMYADDTPVEAMREQRGRGEESACRGRSVEENLRLWEEMKAGSEVGLANAMRFKIDMKSVNGTMRDPVAFRCNLTH…
>CRv4_Au5.s46.g11917.t1
MLVVNKVVIHNIPAPSTVLALQLGASAGLVYSAGILGFIQVDRLEWSKVKAFSLVVAGFLGTLFANMKVLQYANVETFITFRSSTPLLLSLCDYVWLGRALPSARSWGCLVVLLGGAVGYVLVDADFRLSAYTWLALWYAFFTFDTVYAKHVVDTVRMTNWGRVFYGNFMALPPLLLLLPALGEHRTLAALAWAPHQVAVLALSCLMGLGMSHASYLLREAVSATFFTIIGILCKVLTVVINVFIWDKHASPEGIACLMVCVLAGTFYQQAPKRPVLDSVSEVNCSGKPGGGSSGGGGGGGSGGGSGGGGDARAAAMTA
>CRv4_Au5.s46.g11918.t1
MRIAAIDVLAWVLNVASSVAIVFVNKWLMDPVRGHGFVFATCLSAAHFLATGAVCYTGELLGLVKTAEIPILQLMLYTAVASASIASVNLSLLYNSVGFYQISKLATIPVVAALEAVWCGRRFSTPTLMSMAAVAIGSGIVTISDVSLRFTGFVIAAISVVTAALQQIGVGALQRQNAVGPVETLAATAPVQGMCLAAFGPSIDYSLRRAWVFRYPFTVSTGGILALSCVVALLVNLSQFMCLGRFSAATFQVMSHTKTISVLLLGWAFMGDVMSPRKVVGVVVAVGGMVAYSHFASLPLPPGLADRPASGWGLADKRGGGSGAGAHPLDEEKAAAVVAGDERTRLLGGTDRKY
>CRv4_Au5.s5.g11963.t1
MASRAPQDIEAAIADDSRRKTKQQQPLWKRFLTSQLTWDGVAAASCLILALVLELAKPRNTYILKDTLYWHSYPKKDNTVPSSSVPIYSLIGPFVVFLFYRFVAKRSNYEVARLTIALCLAYFLTGAITNCLKLPVGRLRPNFVRTCWPNGTIVLSHEDQWGGYAVCDPSVPESDVDEVHKSWPSGHSSLSAAGLGFLTFWLLGQLRAFAAPSPWFWGAASAAAPPSKGRQWRFLVAILPSFGAVAVAVTRVLDYWHFPSDVLTGLAIGFLTAFFVYRLIYPPLTHPRCDLPWDHLERIEEAARLAGAAGGALASSTSSGNGAGAAHLAPPPLLSGDDGELVGTSPAASVLSVGDGGHGCWCGTEGSATTGHSQHDPLVITMLQQQQQQQQRPASGAHG…
>CRv4_Au5.s5.g11987.t1
MASALLACGRQLSCALGGLSLGHQALGAIGGAFRRHASSHAENTNTFLREALVKLDYPEKLQNLLLTPRREMSVELVVQMDDGQIEVFNAYRVQHNNARGPYKGGLRYHPQVDLDDVRSLASLMTWKTAVMDIPYGGAKGGVTVDPRKLSERELEKMTRKLVVAIKEIIGTYEDIPAPDMNTDAKVMAWFFDEYSKYKGFSPGVVTGKPVYLHGSLGREAATGRGTTFAIRELLKALHMGKIADQKYVIQGFGNVGAWAAQLLWEAGGKVVAISDVAGAVHNEQGLDIGALRKHVASGKPLAEFTGGAAVPKQDILLHPCDVLIPAAIGGVIGPEEAKKLQCKVVVEAANGPTTPEGDMVLRDRGITVLPDIYTNGGGVTVSFFEWVQNLQNFKWEEDD…
>CRv4_Au5.s5.g11988.t1
MRTSIPCRGGRVSSRNAATQRLAVAPAGRNCPRGRTAVRVRAEAPRDGSPTALKEPPTKAPATAPARTPLAPPSPAPAPGPQYFPKPGDPQWPPQRPFAAIALDNLLDSVVDVGRHLGRMNVEADKLAMRQQEQLVPGDNGRMRLRASTKPVVLVLGSGWGAHSLIKVIDTDTYDVVVVSPRNHFLFTPMLPSTAVGTVEFRSLLEPIRTSNPCVTYLEAECDSLDPHTKVAVCTSSFAYDDGRRPQFEIQYDKAVVAVGEQPATFGVKGVKEHCFFMKEVSDAVALRKRIAEKFELASLPGTSEEDRKAALHFVVVGGGPTGVEFAGTLSDFVREDLKKKYPALMKYVKVTLLQSAQQILTQFDAGLGQRATEALESSGVEVRTGVRVVEITINKVLL…
>CRv4_Au5.s5.g12019.t1
MTTELEQQIAAAQEAVTKQGDTVRSLKASAKEGKAEKSEVDAAIQKLAELKLTLESKQKEFEKATGKVSSQSKEALRAALAGVLERRMFYIPSFKIYGSVAGFYDYGPPGCAIKQNMTQVWRTHFVLEENMLEVECPAVTPEVVLKASGHVDRFTDFMVTDVVTGECFRADHLLEGHLEALLEDKKNPVSPEKAKEIRDLLAGVGELKADTMEAALTEYDVRAPGTGNGISPPFAFNLMFKTSIGPKGDMVGYLRPETAQGIFVNFRDLLYYNGGKLPFAAAQIGNSYRNEISPRAGLLRVREFTQAEIEHFVNGDDKRHPKFSLVADLRPLLYSRELQMGEEKKAQPMSLGEAVSRGIIANETLAYFIGRTWLFFCKIGVNPARMRFRQHLQHEMAHY…
>CRv4_Au5.s5.g12022.t1
MMLTAKTGVPALRVQRRSAASGARPVRPAVGRCQKLVVRAEQSSSTETTSFDSEKVLKDLQEKWDAVDNKGAVAAYAAGAVVALWLSSTIVNAINAVPLLPKLMELVGLGYSAWFTYRYLLFKSSREELMKDIGDLSKKISGSE
>CRv4_Au5.s5.g12035.t1
MALMMKSSASLKAVSAGRSRRAVVVRAGKYDEELIKTAGTVASKGRGILAMDESNATCGKRLDSIGVENTEENRRAYRELLVTAPGLGQYISGAILFEETLYQSTASGKKFVDVMKEQNIVPGIKVDKGLVPLSNTNGESWCMGLDGLDKRCAEYYKAGARFAKWRSVVSIPHGPSIIAARDCAYGLARYAAIAQNAGLVPIVEPEVLLDGEHDIDRCLEVQEAIWAETFKYMADNKVMFEGILLKPAMVTPGADCKNKAGPAKVAEYTLKMLRRRVPPAVPGIMFLSGGQSELESTLNLNAMNQSPNPWHVSFSYARALQNTVLKTWQGKPENVQAAQAALLKRAKANSDAQQGKYDATTEGKEAAQGMYEKGYVY
>CRv4_Au5.s5.g12039.t1
MKQSASPPGADANANANGTTSDTDLMSPLMAGNVTGLLADLPPGSSAAVSSYGLKIDDMAGMVVPKGYPLEQHVVITNDGYKLGTFRIPYGRSGPTGNVRPPVLLIHGISLASTCWVLNSPAESLAFILADQGYDVWMMNTRGNTFSRSHTFLRDTQPRFWNFAVDEMALIDFRETLKYVQDQTGVKKIGVVGHSQGATLALMALAVDPWLSESVAVLVAMGPCAYVRLMKSVILSSFCRQANTSAMMNLLPPQELIYMSAEMQQTFLNGACQMPGTMLSCLTTMEGIFGASRRISAAQYRRYWQIWPSSTSLGNALQWSEYDLSKVKAPVVMLSGTADVLAAPEDVAMQVRNLRDAIKGEHKVADYSHMDFIWDTGASKTVYPIITQTLATAFSSS
>CRv4_Au5.s5.g12095.t1
MLNRQAVSARAFGRAAGRSRSSVRVMASAKPLTFSKYQGLGNDFILVDNRHTSEPVVTPEQAVKICDRNFGIGGDGVIFALPPVGDTDLTMRIFNSDGSEPEMCGNGIRCLAKFVSDIDNAAPRKYKIHTLAGLIQPEMLADGQVRVDMGTPILEGPKVPTTLAPTQGSTVVQQDLVVEGKTYKVTCVSMGNPHAVIYSCDGEPIKIDDLDKELAALGPKFERNAVFPARTNTEFVEVISRSHVRMVVWERGAGRTLACGTGACALVVAGILEGRVDRNQVCRVDLPGGPLQIEWRQSDNHIYMTGPAELVFSGQLRA
>CRv4_Au5.s5.g12128.t1
MWASALLRPCLLVPRGLARRGLGLGGPAPLAAARGLFNNTAANATPATPATSHATHSHAGHGATSSAGLNSRHLSHSSSCSAGAGSSSGRGADDATYTTTTTTAATAATATANRNDAGTISDAEWAEVVELLGAMAATKGRPNAPGGWRDAYEYMPVHLQRVGLTPERLASLNFIHVAGTKGKGSTCAMVESLLRAAGYRTGLYTSPHLVDVRERLRLDGRMLPRAEFAASFWRVYGALSTAAARDAQAAATAAAAGGGGGSPASGQVAAVGMPSFFSFMTIMAMDAFLARPPELRPQVVVLEVGIGGRLDATNAVVGPRGCSLAAAAVTSLGFDHMELLGDTLPKIAREKAGVMKPGRPVLAVPQPEEAMAALQEVADRVGASLSVPPPLERYSLAAG…
>CRv4_Au5.s5.g12141.t1
MLATVTLFQPGHAQRVAASPKSKPNIIFIMTDDQDYVLGSTDAKWMPSLDKYLRKQGMEVPNFVTSIASCCPSRTSFFTGKYCHTTNITSNGNLRGSVTKMMGQDLDHDYLPLWLQDAGYSTYMVGKFLNGFTYKAVKKFGCPKGWTVADPLIQDFTTDSEYEFSEDYPRAPNYMTNCQGEVQTYFGDYHEEVIRSKALTYLDDGAASGKPFFLYISTVAPHDAKGPGAYPQVPPAYRDLFPGVKAPRTGNWGKPVPAAVGFSKQTPNDFNVTDIDGRYRARLQSLRAVDDTIDAVMKRLACHGLLDNTVIMYTSDNGFKLGNHNMAQEKFTYFEEDVRVPFLMAGPGVPRGVYVPEVAAAMTDLTATIAHLAGATSGNISVDGAPLPLDRIAAAYPSP…
>CRv4_Au5.s5.g12143.t1
MATSSVARCGLAYCALLALYAVALTSGQQQDWTFQHGVASGDPLPDRVVLWTRQVTCTAAADWTCKLDADGLSPAVKYFYRFTAPGGVRSPVGRFHLPYPRGDARQGRVRLAVFSCSNWGWGYFHAYGVAATYELDAWVHLGDFIYEYGPGDYPRSDPNNPASNQAVRFGLKPANEILTITDYRQRYALYRTDSSLQALSAAAPTIAIWDDHETANNAWKDGFPDAPSSQNNITASRRAAGVQAWHEWLPVRPSGGVGSASSYTELAINRTLNFGSTLSLFLTEDRLQARSSPPYINGALYSSAGSLGAAVGGVAPSKWGPAEEAKILAVKAQADAFANDPNRTILGKPQVSWLKQQNDDSAAAGVTWQLFAVTTIMQDILPNPPAAIAAANASGDAAN…
>CRv4_Au5.s5.g12144.t1
MLTPTPGRLQPCPRLNLRQQDDQDYVLGGADALWMPALDKYVRRQGMELPHFVTSIASCCPSRTSLLTGRYCHNTNITSNSEARGSAVKFLENQLDDDYLPVWLQDAGYSTYMVGKFLNSFKEPLARKGCPQGWTGISPLIQDVDTEDGGEEAPRAPTYMEDCNGQLTSYPGAFQEEVIRDKALSYIDEASGSPLPFFLLISTVAPHDAKGKGSTYPQVLPQYKDLYPGLKAPRTANWGRPPPVTIGFAPSTPNRLNVTDINERYRARLQSLRAVDDTIEAVVRRLACHGQLNNTVFMFTSDNGFKLGTHNIPREKFTWYEEDVRVPFLMAGPGVPRGVYVPEVAAAMTDLTATIAHLAGASPRRVQLDGAPLPLDRIAAAYPRPNQPGALSATAAAAA…
>CRv4_Au5.s5.g12146.t1
MVNWNSIGHFFVYEGYLWDWLTAAVAIVINLVVPAQIDPLNRVYMPNDPTLSYPLEDSSVPTSALYVLVFVLPAVVFAVAAWVKRWTVPSWAFVDWHHAALSIAEGFAFTTGFKRWINLVGRYRPNWLATLQAGDQGEIDDARLSYPSGHSAYMFFSMTVLALYLVGKTELLHRPSQLLFFKAICAMAPMALAAFVAVSRVADYKHAPSDVNAGCFIGFVCGVFAYFLNYPSLFDPASALPKRRGSAVAKAAAEQAAEAAEYGPVPGAPGGSGGGGGAYGTPLQPRMTETAEQLAIMYGASSGGGAASRNGGRSGGGATAVSGRY
>CRv4_Au5.s5.g12182.t1
MKRLAGIDLPIQVVQFTANTNASDLLNANPWLASTKLVVKPDMLFGQRGKNDLVGLNMDFSQAIDFATARLNRTVTVNGCTGPITTFVIEPFVPHKDEYYLSITTNRNGWEVSFSEAGGIHIEENWDKLRTVVLDTLDANPSGGLPEGALAPLIAGLPLELRPTLERFIASAFAVFHDLDCSLMEMNPWTLDSAGQPFPLDMRVELDDTAKYRSGGKWNLDGQELEFPLPFGRLLTPAEAAVSALDEATGASLKFTVLNPHGHVWLMVAGGGASVIYTDTIGDLGYAEELGNYGEYSGAPNTAETYAYAKTVLDCATAHAGDGRPRALLIGGGIANFTDVAATFTGIIAALKEKAAALQAAKVRIFVRRGGPNYQKGLELMRALGPQLGVPVSVYGPES…
>CRv4_Au5.s5.g12185.t1
MKVSEEDSKGFDADVSTRLARSYPLAAVVGQDNIKQALLLGAVDTGLGGIAIAGRRGTAKSIMARGLHALLPPIEVVEGSICNADPEDPRSWEAGLAEKYAGGPVKTKMRSAPFVQIPLGVTEDRLVGTVDIEASMKEGKTVFQPGLLAEAHRGILYVDEINLLDDGIANLLLSILSDGVNVVEREGISISHPCRPLLIATYNPEEGPLREHLLDRIAIGLSADVPSTSDERVKAIDAAIRFQDKPQDTIDDTAELTDALRTSVILAREYLKDVTIAPEQVTYIVEEARRGGVQGHRAELYAVKCAKACAALEGRERVNKDDLRQAVQLVILPRATILDQPPPEQEQPPPPPPPPPPPPPQDQMEDEDQEEKEDEKEEEEKENEDQDEPEIPQEFMFES…
>CRv4_Au5.s5.g12193.t1
MLASKPVVGVRVRSSTASTVARANIRSLAVSSRVALSGGVCQVPTSVVAPAPKSTQSTNAPRRKPVTMMGNKATTGPFAPLVIVVRGAMGEKPFNNFRGKAISYHSQIIKDFCKLLGVDNKQVQGVIRLAKKNGEKLGFLA
>CRv4_Au5.s5.g12205.t1
MALPLRRAAVVARDSKEDAVKALENYASGARANLKEPLATSVPVTPLGRPGPKLQAAKSVEQSIGGSVDGQGLLQLDKDTFWPYLEQQQDTLVVVDFYTDWCGPCKLIYPELVKLSQERTDVRFVKVNCNKSNKELGMQLAIKVAPTFHLYRNKTKVADMTGAKMDKLIALINQHQPPKN
>CRv4_Au5.s5.g12205.t2
MALPLRRAAVVARDSKEDAVKALENYASGARANLKEPLATSVPVTPLAAKSVEQSIGGSVDGQGLLQLDKDTFWPYLEQQQDTLVVVDFYTDWCGPCKLIYPELVKLSQERTDVRFVKVNCNKSNKELGMQLAIKVAPTFHLYRNKTKVADMTGAKMDKLIALINQHQPPKN
>CRv4_Au5.s5.g12218.t1
MASITCSSGKAAVVSRAKTARPVARRMSVVASAAPQGNASRRELLGLSAVAASLLLSSRPAHAIFGFADDNTALFDTYTAETSAILDKVKVTLALDKDDPAKEDSVKGLRKDINNWVAKYRREPKVSGKPSFGNTYSALNALAGHFNSFGATAPIPKKRLERLQKELDDATLLLTRNR
>CRv4_Au5.s5.g12237.t1
METEELLVGWRGETYNAGAHTKSTTVPADSGDVGAPWIETISWVPRAFIYHGFLSHAECDHLIGLALPKLERSLVVGNKSDEVDPIRTSYSASIGYNETDVVADIEGRIARWTHLPRSHQEPMEVLRYINGQKYDAHWDWFDETETGGTGGGNRMATALMYLSDMEPAAGGETALPLAQPLDWEVQGVEGRGYSECASKMGISVRPKKGDVLLFWDMEPGGREPDRHALHASCPTFSGTKWTATKWIHNTPYG
>CRv4_Au5.s5.g12259.t1
MSLGFRLWQNLLPTMNRSLAPSKAQCLRRCGAANIARTRLHTIAAAAAPVAGERRAKANIDWDSLGFGLKDVAATMYVAEWTPEKGWDSGKLVPYGPLNMMPSAQVLNYGQAIFEGMKAQESAKGRVVLFRPDQNAARFKAGAARMSMPSVPEDQFVEAVRATVENNLDYVPPMGKGSLYLRPLLMGTGPILGLGPAPAYTFAIFAAAVGAYFKGGQLTPIDLIVEERFHRAAPGGMGGTKAAGNYSPVLVTQLEAKKNGFADVVYLDAKTDTYLEEVSSCNIFVVKGKTIKTPPLSGTILPGVTRRSIIELARSRGYDVQEAAVSVHEAMEADEIFTTGTAVVVSSVGSMTYRGNKKAYTAPGQAGPVALEMYSALTDIQTEKADDKFSWVYPVK
>CRv4_Au5.s5.g12268.t1
MHCQAARVSTGLGALTTFGGRGELALEKAHLPASLKRFIELVPKAELHVHVEGALEPELMLALAARNGLPPPYPSVEAASLEDAALMSFLNASRTPLTVCPLSNLKLKVYDGQLEARLSQLVASGLVITVNSDDAAYFGGYAVANYNYLARVTGLGVEQVARLAANSFEASFFLGSPGPGGEARRAALLAEVAALAARAMEEEKAEKRRQ
>CRv4_Au5.s56.g12344.t1
MAVMMRTQAPAATRASSRVAVAARPAARRAVVVRAEAEAAPAAAKKAAEKPAWTVPTLNPDTPSPIFGGSTGGLLRKAQTEEFYVITWEAKKEQIFEMPTGGAAIMRQGPNLLKFGKKEQCLALTTQLRNKFKLTPCFYRVFPDGKVQYLHPADGVYPEKVNAGRVGANQNMRRIGQNVNPIKVKFSGRMMSPAEI
>CRv4_Au5.s56.g12345.t1
MQTSTQLMQLGRRQLLRSPRAFSSPVNLGRRAGAPGPVCSTAAGATVATAAEPQAAGAPEKATGEKVAQRKRILSGVQPTGRPTLGNYLGAMKNWVALQESYDNYFCVVDLHAITVPHDPVELRAATRSMAATYIAAGIDPERATIFVQSHVPAHAELAWLLSCVTPLGWLGRMIQFKEKSRKQDGTAKMSKSAENDNTRINLTDTPDQIANKIKRCKTDAVDGLEWGHPDRPEATNLLTIYSLCTGKSKDEVLADVGGMRWGGFKPVLTEAVVEHLRPLQTKYGQLMSDVSYIDSVLAAGAEAAAATADRTLADARDAMGFVPPFKRK
>CRv4_Au5.s60.g12367.t1
MRSVYSPAAEMPAGVSMRAPVPAALRSAARSGLHLRNASFHTHRPSVVAPAAAKDLEPTSASSNGAPKNNGVQFTKLSTTAVHGGERGGRPRVADALTTPIVQTSTYHFRNTAELIEYNEGRFDSYEYGRYGNPTAQACENKIKALEGAEDCLVSASGMNAVTSMLLSLVPAGGHIVTTSDCYWRTRQFMQNFLPKMNIGVSVIKPNDLEALQEALDKHSVTLFFSESPTNPYLRCVDILAISRLCHAKGAFVCVDSTFATPINTRALELGADLVLHSATKYLAGHNDVLAGALCGKKELVEKVREFHHIMGGVVDPHAAYLLLRGLKTLELRVTRHNASAMEIARRLESHPKVVRVWYPGLESHPDHAIAKRQMSGFGGVVSFETRGGLNECISFIDN…
>CRv4_Au5.s6.g12399.t1
MAALESFLYTSESVNEGHPDKICDQVSDAVLDACLEQDPDSKVACETCCKTGMVMVFGEITTKAKVDYEAIVRKVCKEIGFTSEDVGLDADKCKVLVHIEEQSPDIGQGVHGMGTKALEEIGAGDQGHMFGYATDETPELMPLTHVLATQLGYKLTEVRKNGVCPWLRPDGKTQVTVEYKREGGAMIPQRVHTILISTQHNPDVTNEKIREDLMEHVIKPVVPAKYLDDKTIFHLNPSGRFVIGGPHGDAGLTGRKIIIDTYGGWGAHGGGAFSGKDPTKVDRSGAYIARQAAKSVVASGLAKRCLVQVSYSIAVAEPLSVFVDTYGTGTMPDAEILKLIRKHFDFRPGLIGKNLDLKRGGNKRYQKTAAYGHFGRDDPDFTWETVKKLE
>CRv4_Au5.s6.g12413.t1
MGKTKNVLLSVTAGVVAVTSRLTGLGGVAAIGCGALVATAVGIALAKVKKDGDAGAPKKSGSRGPSLPQSAAFKPLDKLMRERIIFIDGAMGTQIQKFTLEEEDFRGERYAKHSHELKGNNDLLVITRPDVISKIHTAYLEAGADIIETNTFNGTWISQSDYELQADEEVALINRTAAQLAKKCVADFLAKNPGSGPRFVAGAIGPTNKTLSVSPSVENPAFRGITYDEVVDAYYKQAEALVEGGVDMFLVETIFDTLNAKAAMYALEKFFSDKGMRLPVFVSGTIVDNSGRTLSGQTNEAFWNSIRHAKPMAVGLNCALGAKDMLKYVANLAACADCYVFCYPNAGLPNAMGGYDQKGDEMAEEIRPFCEGNLVNAIGGCCGTGPEHIAAIKKMASAY…
>CRv4_Au5.s6.g12423.t1
MRHPKYNKGLAFSDAERDRLYLRGLLPPAVLSQEVQLERTLLNIRSKDSDLEKSTYMQSLQERNERLFHRVLVENMEELLPVVYTPTVRLACQKYGLMFKSLPRGLFITLEDRGRVFRILKNWPERNVKLLVVSDGERVGDLGDLGVQAVGVPISKISLYTACGGISPSITMPVMVDVGTDNEELLRSPFYVGVRHKRVRGDPYYELMDEFLTAVKRRFGNTVLVQFEDMAYDNASKLLNMYRTEFPCFNDDMSGTAAAVLAGVLAALPRTGGRLADHRIVFVGEGAVVACIAELFATAVATATNQTVLDARKRMWLVDSQGLVTRERGDSSTLESFKLPFCHSVGSECRDLASAVQLLQPTVLVGLSTTGPAPPWAFSQDVLQAMAASCRHPLIFPLS…
>CRv4_Au5.s6.g12425.t1
MANYAKRLWLEEDLGDDYRWSYRVSEVLFSGRSEFQEIDLVDTPTWGKVLLLDGKMQSTEADEQVYHELLVHPPLLHHACPKRVYIMGGGEGATAREVLRHKTVEQVVMVDIDKVVTDFCSKHLERNTQAFADPRLTLINDDARTQLEQAPDGSFDVVIGDLADPLDGGPCYQLYTQEFYRNVVLKKLAPGGIFITQSGPAGFLSCKEVFTAIHSTVRSVFPVVVPYAQHIPSFCDIWGYNMAFSDAAQAPLSPEELDSRIGARLDGVPLHFLDGVTFQGLRHLNKMVRVALQEEKEVYTVDSARFIHGAGVKA
>CRv4_Au5.s6.g12446.t1
MSQGNIAKWHVKPGQEVSPGSVLADIETDKATLAFENQDEGFVAKLLVPDGARDIPIGQPVLVLVEDASSVAAFANFTPGQSAPADAAPAAPVEQPPAAIAAPALMEHAYPPHTRLTMPSLSPTMDRGNIVAWKVSPGTAIKAGDVLADIETDKATLAYEAVAEEGYVAALLVPEGTRDVAVGTPLALLVEDPEHLAAFARLTPEQAHALALGPQSGQAAAAAGITPPASQGPAEAAPRVVASERLGPAARLLLESSGLKPEDVTPTGPNNIITKADVLAAIAGGVKPGSAAAAKPAATKPVAAATAPAAATLKAAAPVAAATAAAQPSAGSAGPSGSGGSGGGSYTDTPNSQIRRIIAARLLDSKRNTPSLYMRADACLDAVADLRASLAARGTKVSV…
>CRv4_Au5.s6.g12448.t1
MLAAQKRAVFVQRPGRQTCVRVCAKVSKKDGEPRVVRGKCFVTKDNIDTDQIIPAEYLTLVPSKPDEYEKLGSYALIGLPDDTYTTRYVKEGEMKTEYPIIIGGQNFGCGSSREHAPVALGAAGAKVCVAESYARIFFRNCIATGELYPCETTVRLCDELKTGSEVTVDMDANVLTDHSTGKTYNLQEIGEAGPVIDAGGIFEYARRQGMIKTA
>CRv4_Au5.s6.g12461.t1
MALRAFGSLALGNLGLQAQVMQFAGATAMRAYATVEKGYKYAASHEWAKVDGDVATVGISDHAQGELGDVVYVELPDVGKAVKKGETFGVVESVKAASDVYSPISGEVVEVNSLLVDKPGTVNSSPFKEGWIIKVKLSNKGELSSLLDSDAYAKECEKH
>CRv4_Au5.s6.g12484.t1
MAKANIPWRKLTGDHVSVADAAGKKVLQVAPEALTLLADSAMRDVAHLLRPGHLQQLANILKDPEASANDRFVALELLKNANIAAGFVLPGCQDTGTAAIMGKRGQYVWTDGRDEEHLSRGVFRAYTSTNLRYSQVAPLDMFSEKNTGTNLPAQIELFASPGSSYDFQFIAKGGGSANKTSLYQQTKALLNEKSLTAFLTDKIKSLGTAACPPYHLAVVIGGLSAEMNLKTVKLASTRYLDTLPTSGNALGRAYRDLEWEGRLLDISRQLGIGAQFGGKYFCHDVRVIRLPRHGASCPVGVGVSCSADRQALGKITGEGVFLEALERNPGQYLPDVTHEQLSTDVVKVNLNRPMQEVLAQLSSFPIRTRLSLTGTLVVARDIAHAKLQERLAAGKGLPQ…
>CRv4_Au5.s6.g12531.t1
MRRFATLNEQAQSTASTSSSTRSVCARICSNRRRASIQPLGTVALGRRSGVACRSGVAVQAAAVVQEEYDVVIPKFPAPAAGAFLPDKRSFREEHRIRGYEVSPDQRATIVTVANLLQEVAGNHAVGMWGRTDEGFASLPSMKDLLFVMTRLQVRMYEYPKWGDVVAVETYFTEEGRLAFRREWKLMDVATGKLLGAGTSTWVTINTATRRLSKLPEDVRKRFLRFAPPSSVHILPPEETKKKLQDMELPGQVQSAQQVARRADMDMNGHINNVTYLAWTLESLPERVMSGGYKMQEIELDFKAECTAGNAIEAHCNPLDDHSASFVGPAPANGNGNGHAAEPAADSAPLYFLSMLQKCDENGCTELVRARTTWSRTLEGAKPAPPPLSELSAAQ
>CRv4_Au5.s6.g12536.t1
MSFLAPSLGVARGILEPASAARPPAHAAGHAPVLTSDRTGGPAANHDRPAGAPSPHAASLTPSSSGQASQQGDPQRSQHQQAQRQDQQQSQSRSLQSHLITAATLLPALPPPPPGGNGDGDGGEAAGPQPLADVAAQPPEVVLTLASFAVTKLAYVRVTRAFREWYERTKGVDVRFRLTFAASGVQARAVIDGLPADIVALALPLDLDKIVSAGLIRPDWRSAYPAASVVCETTVAFVVRQGNPKNIRTWEDLTRAGVEVVLANPKTAGVARWIFLALWGAKMKKGNAAALAYVQRVFENVVVQPRDAREASDVFYKQKVGDVLLTYENEVILTNEVYGDKALPYLVPSYNIRIECPLALVDKVVDARGPEVREAASEFCRFLFTPAAQHEFARLGFRV…
>CRv4_Au5.s6.g12556.t1
MALSASAPALAGLRPVLNALPALTRALVQPASAATTTLFGNVEQAPKDPILGITEKFLADTNPIKMNLGVGAYRDDNGQPVVLDAVREAERRVAGSHFMEYLPIGGLRDFISESVKLAYGDNAAVLAEGQVAAVQSLSGTGSCRLFADFQKRFMPGTKVFIPEPTWSNHFNIWRDAGVEFAKYRYYKAETRGLDMDGFLEDIKHAPAGSVFLLHACAHNPTGVDPTPEQWRQLSRAMLERGHFPLFDMAYQGFASGDCDRDAASIRIFLADGHRLAVSQSYAKNMGLYGQRVGCLSVVCDNKRDASAVESQLKAIARPMYSNPPLHGALLVTKILQDNDLKQLWFKEVKGMADRIISMRSLLRKRLEEAGSPLPWGHITDQIGMFAYSGMSPEMVDALA…
>CRv4_Au5.s6.g12571.t1
MIAPQIRGIKTNIPFLENVMRHPDFLSGEATTFFIEQHQRELFNFERHGSLRSSKLLTYLADMVVNGPDHPGAIGAPPSKFVPSPLAIPDQLVGNLSGPGWRDVLQREGPDGWAKAVRAHKGVLITDTTMRDAHQSLLATRMRTHDMLKAAPATAAILSQAGSLEMWGGATFDVSLRFLHECPWRRLERLRELIPNVPFQMLFRGANAVGYTSYPDNVVRAFVSEAVRSGVDIFRIFDSLNYVDNLRFGMDAVRDAGGVVEATLCYTGDITNPKSKQYQLDYYLDLAEKLVEHGCHALAIKDMAGLLKPRAATILVGALRQRFPNTVIHVHTHDSAGTGVATQLAAAAAGADIVDCCVDSMSGLTSQPSMGAIVNALHGTPLDTGINPRHLLPLFNYWE…
>CRv4_Au5.s6.g12572.t1
MKYKLRMTEDEVVENAVAAVKHLRSLGCNDIEFSPEDAGRSDPKFLYRILGEVIKAGATTLNIPDTTGWCLPHEFGELIAAIKKNTPGADNVIISTHCQNDLGLSTANSLAGAQAGARQIECTINGIGERAGNASLEEVVMAIKLRGNDVMKGLHTGIRPVHIYPTSKMVSDYSGMVVQPHKAIVGANAFAHESGIHQDGMLKNRETYEIMSPESIGLPRQEQDRGIVLGKHSGRNALNSRLRTLGYELSQSELDDVFKRFKALADKKKGITDEDILALMSDELHQPKVIWELLDLQVVCGTMGMPTATVQMKGPDGIARIGVGVGTGPVDAAYKAVDSLVRVEAELSDYSVSSVTQGIEALAHTRVMIRPSGKMSDAGYSEHAALGTVQRQFSGSGAN…
>CRv4_Au5.s6.g12596.t1
MAAMLASKQGAFMGRSSFAPAPKGVASRGSLQVVAGLKEVRDRIASVKNTQKITDAMKLVAAAKVRRAQEAVVNGRPFSENLVKVLYGVNQRVRQEDVDSPLCAVRPVKSVLLVVLTGDRGLCGGYNNFIIKKTEARYRELTAMGVKVNLVCVGRKGAQYFARRKQYNIVKSFSLGAAPSTKEAQGIADEIFASFIAQESDKVELVFTKFISLINSNPTIQTLLPMTPMGELCDVDGKCVDAADDEIFKLTTKGGEFAVEREKTTIETEALDPSLIFEQEPAQILDALLPLYMSSCLLRSLQEALASELAARMNAMNNASDNAKELKKGLTVQYNKQRQAKITQELAEIVGGAAATSG
>CRv4_Au5.s6.g12600.t1
MLYGVLQERIMTMPFGEGAAAEVFKYSLFLVLCNRLTTCAVAIVMLVHDGKYSEIYPVAPIWTYFAVSLSNVIATTCQYEALKYVSFPVQTLGKCAKMLPVMIWGILMLRKKYKAADWGLALVITSGCTVFLLTGDVKSKVSESLWQSSIYGLALMLGYLGFDGFTSTFQDKLFKGYNMTTYNQMLYTTMCSSILSMLGLFSSGQLPLAFSFVNRHPDALSSMMTLSVAATVGALFISYTIKTFGALVFATIMTTRQFLSILLSCILFAHPLTGGQWLGSTMVFGALYYQGFAKKDGGKHGAKTEAPPKDTERGEAAAQEEPLLGGKQEEK
>CRv4_Au5.s6.g12602.t1
MSDDKKKQPHVSPAIKGFAGSIGGVAEACALQPMDVIKTRLQLDKAGKYKGIWGCGKTIIQEEGVAALWKGLTPFAMHLTLKYALRMGSNSVYQSMLRDDNGKLTDGRRMLAGFLAGITEAVVIVTPFEVVKIRLQQQKGMAKEQLKYKGPINCALTVLREEGIRGMWSGCTPTVLRNGTNQMCLFWAKNNVDKFLWDKHEGDGKMLTPTQSMTSGFLAALLGPIATGPFDVAKTRLMAQTKTSGGTRYSGFFDALMRIPREEGIMAMWKGLLPRLLRIPPGQAIVWAVSDQITGYFEAQSIAKASGSLPA
>CRv4_Au5.s6.g12607.t1
MSALLARKAVVLGRPQPACTRPHLQLHHRRRVAVLGAQDGARSEVVIVDAPSSQNGVHHDPVPEPAPAAAAAAAAPAPEPAPTGPIGIKIVPAAVAIGIGLALRFVVPIPEGITAQAWSLLSIFVSTILGLVLDPLPVGAWAFMAVTVAVATKTLTFAEAFAATTNEIIWLIVVSFFFAKGFEKTGLGERIATLFVKALGKSTLGLSYGLNVAEALMAPAMPSTSARAGGIFVPIIKSLAHSVGSEPGDDSRKKMGSYLIQSQFQTGVHTTSFFLTASAQNLLCLKLAGELGAVVPNQFATWLAGAFVPAIVGTLLTPLILYKLSPPTITDTPDAPAAAAKRLEAMGPMSRDETIMSAVMGAALVMWMFGEQLGISPVLAAMMGLCGLLCTGVLTWREC…
>CRv4_Au5.s6.g12617.t1
MATMQISAKGLAPLRPRVSSRRVVKPVASGGGKTDITKVGLNSIEDPVVKQNLMGKSRFMNKKDWKDASGRKGKGYGVYRYEDKYGANVDGYSPIYTPDLWTESGDSYTLGTKGLIAWAGLVLVLLAVGVNLIISTSQLGA
>CRv4_Au5.s6.g12632.t1
MEAPTAAAGRAGDASPASSTMFGRMPSGVVDHRLVASPGSVLTSSLIAKAANKSMEELSNPAYSAAKAAYQGVPGAYSEVAARKACPDFDPLPCDQFEVAFQALSQWMAERAVLPIENSLGGSIHAVYDLLIRYRLHIIGETSLAINHCLVALPGTAKGDLKRVMSHPQALAQCDGYLRRMAVVKEAVDDTAGAAQIVARQGLQGVGAICSRRAAELYGLDVLEEGIQDVKDNVTRFIVLSRDPLVTSESDPRTYKTSIVFSLQPGPGQLFKALSVFALRDIDLAKVESRPMRTNPIVQIPSQDGTSFTRQNFNYMFYVDFVGSLQEVRCQNALRHLQETAPFLRVLGSYPMDTELGTMSSDDPGMMQNMSRYN
>CRv4_Au5.s6.g12637.t1
MEVHVSTFGAAILKVVVPDKAGKKADVVLGYASVDEYETANPVTYFGVVVGRVANRIAGAKFSLGGVDYRLLANNGPNALHGGLKGLHKRRWEGRKVHDHDGNESVQLHYTSPEGEEGYPGTLHVQVTYTLLRHSNELHTSIVATTDEATPVNIAQHSYFNLAGHASGSILGHTLRLVGADHYTPVGATLIPTGEIAPVAGTPFDFTAPQTIGSRIDKVPGAAPGGYDHNFVLFGMGPQAKFITKNGMASDKPKLAASLVDPSSGRAMDVLTTAPGVQFYSGNFLDGTTVGKGGVRYGKHAGLCLETQGFPNAINEPKFPSIVLQPQDTYHHEIVYRFYNV
>CRv4_Au5.s6.g12638.t1
MAEEYDLVTLGAGSGGVRASRFAATLYGAKVACVELPFGFVSSETVGGAGGTCVIRGCVPKKLLVYGAAYAEEFADARGFGWALPAAGAGAEGGPAHDWASLMKLKEKEITRLNSTYGNILKNANVALIEGRGALKDAHTVEVTAADGSVRLLKAKHVLIATGGVATAIPMEGAEHAIMSDDALALQSLPPGPIVVLGAGYIATEFAGIFRGTHAAQYAVHLMFRGDKVLRGFDEECRDQVQDNLTRRGIHLHPGCKPTKLEKHGEGDLTLHYTDGTGAAQSLKCGLVMMATGRKPRVDGIGLEVVGVALDGQGAIKGDDFSRTNVPNVWAAVGVALDGQGAIKVDEFSRTNVPDVWAIGDVTNRINLTPVALMEGMAFAKSCFGGELTKPDYRNVASA…
>CRv4_Au5.s6.g12644.t1
MDRAGLSCKPADEGFPSSQSVLDINGLCGPRLSHDEGGNITTAELLASQQRQERDGELLENGGAAGGGEGDPLTGAAAAAAATAHLFASADTPNFFQSTKFFACLDVEEAQELFRATKKVSLAPHEVLFRSGDPSDSGIYIVLHGTLGVFLEEPGHNMPPIHANTLRSGESVGDLDVVDGAVRTVSCMALESGCLLVNVPRALFMDFVHSHPRALMLYLQQGLARLWRVAHFVLADFLQLQLYRPPRRGGAGGSGSAAAGARGGGGVGASGTSYDSGSGGGYAPSSPPAPPVKPLVRTLSNLFGHEQGTQTEEEEAGLAWPPAASAAASLTGMCLDEAVVAAPAADLAPVALAAAEAGREPQQEPAASPASAAGAGGSGSGSGSGSSKNRRKKAAAAAK…
>CRv4_Au5.s6.g12650.t1
MTSLLKQVALPVFNSLATTYRSVVGAKLAKYGLRFDDLQDPLKDEDVAEALRRLPPDVVVARNCRLRRALDLSCKHEALPKDLLEKQTPELSYLQDVLNEVRAERRERAQLGAPAPYTRIYYD
>CRv4_Au5.s6.g12654.t1
MRLQRHAAAGLGATKHRDTLTARLPCQSTRGRAALQVACVATPHSADSQKGAPKATATPSGQYVSSPYGAGRVLTPSPPGSIDDDDVLELKNLRNYLVPRDSPFIVDNNQGGGFVGDRDRIRLHTVEFESTESAGSFCADGVLTNGDEDSCILLPEWAIRCGPRKTIYFDPQQVSAAVVTCGGLCPGLNDVVQNIVYTLTDYGVPEDNILGIRYGLRGFYERDAKPITLTRKYVDGIHLKGGTMLGTSRGGANVKEIVRRIDLWGLNMVFVVGGNGGNAAANAISEECEAQGVCCSVVGVPKSIDNDILIIDKCFGFETAVQEAQRALLAAKVEAGSARNGLGVVKLMGRQSGFIAMQAAMASGVADVCLIPEIPFRMDKLCEHVESIFEKQGHCVVCV…
>CRv4_Au5.s6.g12661.t1
MGACCGKPQAPEGTATGGAQAVTSTLKNVADQTSKSVAAVAASATTAGEGAVLKAKESVEAVSGQAAGAVNSTAAADAKAAATGAAAAAGSQLASAQEAGKAAVTDATGAASSAAADARAAATGAAAAAGSQLASAQEAGKAAVADATGAASSAAADAKAAATGAAAAAGSQLASAQEAGKAAVADATGAASSAAADARAAATGAAAAAGSQLASAQEAGKAAVADATGAASSAAADARAAATGAAAAAGSQLASAQEAGKAAVADATGAASSAAADARAAATGAAAAAGSQLASAQEAGKAAVVDATGAASSAAADARAAATGAAAAAGSQLASAQEAGKAAVADATGAASSAATDARAAATGAAAAAGSQLASAQEAGKAAVTDATGAASSAAADAM…
>CRv4_Au5.s6.g12662.t1
MDGNRRYAERQHVDKATGHTHGYGKMVEVIHWCMELGVRHISVYAFSIDNFRRSPEEVTALMRLAEDKYFELARDNGLAEREGICMHIVGDLTLPPPSVQGAAARLMRNTAALRRHRATLNVCFSYTASEESVAAVSELQAAVRQGLLQPGDVTPVALHGALRTRHDCPPVDLLVRTSGETRLSDFLLWQVAHAHLCYLPTLWPDLSVLDFARCVLSYQRQRPLQEALRQKAAAAVAAAAEAGPGVASTGAGAGAGAGKADGQVGAAATAGGVRMACGEQQEVAAASTAGEQTGLRRRMGSSGPAGPHHVQQAPDNGISLDSAASEMRTSLWALCRRYASLAAPASMPGAKCFSSHGHSASSPEPPRADPHGSSAGSRGVPCAGEGSSGGGLEAAQWRL…
>CRv4_Au5.s6.g12663.t1
MSPTYAEHLSVIKGFCDKADGKDKLTALIQYACLFISAGEPGNIKKIQASVTAARKVFRVMRPLELMTPLLITPGFTGKQPMLLEAVNKVKAVLMAVYFGADHVVWAHQIGLITDKKVGERYQKLSLWSWALGSVCTVATESYQIAAKSVVRKEGESEEDYARRVEEVKKQINQHLFVLIHGLFQAALAAGLLQLLPLKPRTVGLLGVVASAMNCYLLLPAYPKPVAAAKAKSA
>CRv4_Au5.s6.g12674.t1
MSGMMVLGLMFVAWYGTNIFFNIYNKQLFKVFPFPLTTTNIQFFIGSCLSMVFWVTGIVKLPKIDMALVKSIYPLAIINVLGNVLTNVSLGHVAVSFTHTVKAMEPFFSVIFSAIFLGDVPPVPVLLTLVPIVGGVVIASLTEATFNWTGFLSAIFSNMTFQSRNVLSKKLMIKKGAVDNMNLFQIITIMSFLMLLPVSTMVEGGAALLTPESLANLGLNEAAREQMFMRLLSAGICFHSYQQLSYMILSRVAPVTHSIGNCVKRVVVIVASLIAFQNPISMQNAIGTGIALFGVFLYSQAKRKYKGKGDVKPEAA
>CRv4_Au5.s6.g12681.t1
MLPSLLTNARRGAQAALQPGFLSAFISTTSESLNAAATATASKPAPSRPPLAKPPLYKEFQIYRWNPDSDEKPKYASYQVDINNCGPMMLDVLLKIKDEQDQTLSLRRSCREGICGSCAMNIDGSNTLACLCKVNRDPGHVGKVAPLPHMFVVKDLVVDMANFYAQYKSIKPYLQKKEAAKGQEFYQSKESRAKLDGLYECILCACCSTSCPSYWWNSDKYLGPAVLLAAYRWIIDSRDDMTSERMKEVDDAYKLYRCKTIMNCATVCPKGLNPGKAINKIKQSLAKGSPV
>CRv4_Au5.s6.g12686.t1
MANCTVGAGVLSLPFAFQATGLVGGLLLCTVVAVIEGLTMYVLSKFAERYRAHSYVELVRRALGRKLSLLLSGVLVVAMFGACVAYLIILGDNLTSLAAAAGLPALVANRQHIVGFLGLCVMLPMCLPKNLGALAAMNQIAVLGFLVGAAMVSFRGMQIALQRPDLMAGVRLFEMDYDSLFAIPIVVFGFNCHAMVVSIFQELEPAPGLLLPAVLPSSPSAFRRWRYLPRPDSRKLVGMLGVIMSSTSLVLLAYAIVGITGYLAFPGYVSSNILVSFPQDDPLVQVARGTISLIILGSYPLTHHPARAGFQHLVRPRAASAAAVTAPSPLSEPLLEASQDPSVGVSPYVSIGFTLAFVLGSTAVAEVVTDLGFVLHLLGGLCITFIIFFLPGLLLINAA…
>CRv4_Au5.s6.g12736.t1
MGVETTSREFHSAIGCNVYISEGRDKALIGKLEAAAQATPGVALVNVFQDEPYHRTGFTLVSGQPDRLTEAVVRLSRAALQLLDLRRHDASHPRLGVVDHIALHPLGGLAPAAATQYGGSPAAAGLIPNTVWVPPPPGSTPLAVAATCANLIARQLSPPQAEEEEEEAVAVAEAGTERGGARGVGSSSSTTTSSSGSSSSSSGSSSSRGVATTVAGGQEEEVPALPVYFYGHAHPSRRGLADIRRKLGYFRRSPEGGWRGGLEQQQLPAGNDLSAFPPDLGPATASARWGVVTIGATPWVGNYNVPLSGVDMATARKLAKAISERGGGLPGVQAMALQHADGLVEVACNLLDAAAAPPGTLQARLEGIAGAWGLDASQVRPGYQTNRSPEELVRAAVAA…
>CRv4_Au5.s6.g12740.t1
MTWPEPPNYYEAPKHGFKVTLENPTFPIINPDPNITDAVTNMRSENWGVVAGLAGLGYVAGYYFGAKVHWAKPTALFTSIFLGKSGLLWGMSDSAHRLMGFKENSKEVAANLPHVMQRESY
>CRv4_Au5.s6.g12748.t1
MLHQISAKRCGASGVVRGAAGLQAFSTKLVAPLPARRVACQVVSTETEAPTIVLDRPGRTVQPELSIPAALNQEIREGHYEAALVKEQANKADASQAAIASVLKPADTTVTADVTIVGAGPAGLFLAAELGKRGMSVNVLGLDVPIVNNYGVWTDEFEALGLTHTLECSWPDAVCYFGEGNQVSVGRGYGRVSRRLLREHLLKICEAAGVRFSSAEVADIKVVEEGKLTQLTTKEGAVYSSRLTTLAAGAAAGKFLRYEEDAPIVAAQTAYGIEAEVEGYDAAYPGDLMTFMDFRRHHTGLHDGTALKFVPGRHPNSGDGTWGSSEECPSFLYAMPLGGKRVFLEETCLVAKPALPFAVLKRRLTRRLKAMGISVTKIHEEEWSYIPVGGPLPLPDQSV…
>CRv4_Au5.s6.g12772.t1
MLPALAGRLGRLRALKTNRMQALGGAEFHVNSSGNPTNYEEEDEVPPYTPALQHPAYVVRKTGVDLLHDPWCNKGSAFPKSERDRLGLRGLLPPRSLTMELQAARFMEDYYQPKELIPPEDVKLGGVTSAMARRWKLLQELQDRNETLFYRVLVDNFTEMAPIIYTPTVGWVCVNYHKLYRRPRGMYFSAADRGDMLAMAYNWPQQDVQAIVVTDGSRILGLGDLGVNGLGIPIGKLDLYCAAAGFSPSKVLPVVIDVGTNNEALRNDPHYVGLRIPRITGPEYFEIIDEFVSAVMARWPSAVLQFEDFSINHAVPLLERYRKHHLVFNDDIQGTAATALAGLYGALRVMGLPPAALGQQRIVCVGAGSAGMGVARMIASGMQKQQSLTAEQAADRFHV…
>CRv4_Au5.s6.g12799.t1
MLFRGPTKANPSRVSSHSVESQRCAQAIPRGVPTPGRVVACRAASAYAGSAYSADPAGALAALEEENKLLKTTISDAKAAIMELETQLKASGIPLPAPENSPDLMPTQPEDFWSPAMEVPYNYEYKDRYGAISPIPGHDGTECFSWDATLWGFAEHFRYRWRRLRSIRQAIEDNEGGLDNFTKSYNRFGLNRGMHEGRQGIWYREWAPGAKALSLIGDFNNWTPKDAHWAFKNTYGVWELFLPDGPDGTPAIPHRSKVKCRLETPDGQWVERIPAWIKWATQAWNEIQFNGVHWDPPETGSPGEIASDKKYTFKYPRPPRPRSLRIYECHVGMSSQEPKVNSYLEFRRDVLPRIRALGYNAIQIMAIQEHAYYGSFGYHVTNFFAPSSRCGTPEELKAL…
>CRv4_Au5.s6.g12805.t1
MRRPCSRYIPASTALRSGLKALRALGINGISVDVYWGIVEGAAPMEYDWSSYKQLFALIRDEGFMAQVCLCFHGTEAVPLPAWVLAAGAANPDIYFTDRAGVRNTHCISLGVDEVPALDGRTALACYRDLMTSFRVELEPLLGSTIVDVCVGLGPDGELKYPAHPRDRRWNFPGIGEFQCYDKYMLAGLRACSHQVSQPSWGLGGPHDAGAYTVWPQQTGFFNQYGNWSSPYGKFFLQWYSDMLMQHADSVLGIARDVLLPADGSLSFSGSSAGFGSSSSSSSVRPGFYGNGYGNGNGIWRGSPAAAAEPPRLRLHAKLPGVHWWYNTASRAPELTAGFYNTTSRDGYLPIMEVLSRHGISVRLRSAEMRSSEIAPQQACCDPERQVAQQRTVAAALLV…
>CRv4_Au5.s6.g12827.t1
MALGATRQARGCHAVLAGGAPFTARAATAVDVPSTSATSVTPLTVLDERTAPERLRETSTLIFDCDGVLWRGSEIIHNAPEALKEFRRQGKRLLFVTNNSSKSRAGYVAKFSSLGLEVAAEEIVSSSYCAAAYLTSQGFGPGGSRPCSKVLLLGWSGVEQELEQAGIPYVGGRALKVPPMDDLDAMKALKVWRDAVDPDVGAVVVGWDPNFSYSRLVYASIHLRELPGCLLVATNMDCADHIGGGRMMPGTGGLVKAVETASGVSAVNVAKGGEWLLPYLCRTYGLEPAHTAIVGDRMDTDIHLGRQGGLFTCLPLTGVTTLKRLEGLPASEHPDVVVRSVAQLAGLPA
>CRv4_Au5.s6.g12827.t2
MALGATRQARGCHAVLAGGAPFTARAATAATAVDVPSTSATSVTPLTVLDERTAPERLRETSTLIFDCDGVLWRGSEIIHNAPEALKEFRRQGKRLLFVTNNSSKSRAGYVAKFSSLGLEVAAEEIVSSSYCAAAYLTSQGFGPGGSRPCSKVLLLGWSGVEQELEQAGIPYVGGRALKVPPMDDLDAMKALKVWRDAVDPDVGAVVVGWDPNFSYSRLVYASIHLRELPGCLLVATNMDCADHIGGGRMMPGTGGLVKAVETASGVSAVNVAKGGEWLLPYLCRTYGLEPAHTAIVGDRMDTDIHLGRQGGLFTCLPLTGVTTLKRLEGLPASEHPDVVVRSVAQLAGLPA
>CRv4_Au5.s6.g12839.t2
MGKGCGAALGKGKKKETTAAEAAAPAAAAAEPAAEPAAAPTPAPAPAAEAAPAVAAAAPAPAAPAEPAAPFILKSILHYAPIEQKMAHDYKLKAHPAIPAPEGPLLVCILDGFGENEYKDEFNAVHVAKTPTVDALRAVPHRFRSIKAHGKAVGLPSDADMGNSEVGHNALGSGQVVDQGARLVDLALETGRMFSDPGWKLISEAFPSHTVHFIGLLSDGGVHSRADQLHGCLRGAVERGAKRVRVHILTDGRDVPDGSSIRFVEELEAVLAELRGKGCDIAIASGGGRMQVTMDRYEADWSMVKRGWDAHVLGKAPHYFKDAKTAVTTLRGSEDAPVSDQYVAPFVIVDEADKPVGTIEDGDAVVLFNFRADRMVEISKAFEYEDGFTAFERERFPKG…
>CRv4_Au5.s6.g12841.t1
MLKGLNLERNKKPLVYVLSSRSCADCREFMNSWTRIARVTLSSLTAQYLAVLALDDYVLDLGPELSPPNGDYLPRVFFADPDGTLRLEVRNPGSDKSAPYYYSSAEEVVEAMRRFLQQHQEDVGTAAYPADLQQDIP
>CRv4_Au5.s6.g12851.t1
MALTMKRSGVAARSASSRKSVVTCVARQSWLPGSQIPAHLDTPAAQALAGNFGFDPLGLGKDPVALRWYQQAELIHCRTAMAGVAGILIPGLLTKAGALNVPEWYDAGKVAIENSFAPWGSLLAVQLFLCGFVEAKRWQDIRKPGSQGEPGSFLGFEASLKGTSELGYPGGPFDPLGLSKEADKWADWKLKEVKNGRLAMLAFLGFVAQKYATGAGPVDNLAAHLKDPWHVNYATNGVSLPFL
>CRv4_Au5.s6.g12858.t1
MSGEEAAAKAAAHLADTEPPTIFDKIVSKEIPANIIYEDDEALAFRDIQPQAPVHFLVIPKKRNGLTRLSKASPEHKALLGHLMWVAQHVAMKENLGDGFRVVVNDGPNGCQSVYHLHLHIMGGRQLTWPPG
>CRv4_Au5.s6.g12862.t1
MIAFYGVFAAGFATRPLGALVFGIISDRYSRKTALMLSIVIMSIPTALVGCLPTYQTAGLAAPLLLVLIRVLQGFAVGGEFTATMVFLVEHAPPHARGLHGSWAFASVMVGVIVGSLVAMAFTLALSEAAMLAWGWRVPFLLSILGSGVGVYIRRHLRDPVSEEEDDHHHHGSGRRGPLRRVAGGILMVVLIDFMNALGFYLVVIFLPLYMQNFAHLSHRAALSVHTANMFLYLAVIPLGGWLSDKYGRTRVILLPAVAMAVVAYPLWCLFKTGSAGAAWFAQAALVCLMATFTGALPATFVALFPSEYRCTGLSIGHNLSMAAFGGTAPIMATGLLRGTGDIASPAALLIIAAAMTAAGALMLKRWRIR
>CRv4_Au5.s6.g12863.t1
MVETSRAPDGTNRRNSLSARPAANLPGLRNVASVSADKDQEPALVTREGPTKDNAEIDQLYADAEDQRLSKTSLVDDVLNISNVLTDGVSAMVDDSFNKCFTSTRPEPWNWNIYLFPIWVVGVLVRYFILFPVRLTLLMIAFNTLILLFLVFDISLPRGRRKMAIQRKLVQWMCCAWVAAWHGVIRYHGPKPTPGPNRIWVSNHTSMIDYVVLCSYSPFAVIMQLHHGWIAFLQKRILSSLGCLWFNRTEVNDRAVVATRMREHVNNPDGIPLLIFPEGTCVNNEYTVMFKRGAFDIGATVCPVAIKYNKIFVDAFWNSRRESFGKHLFRLLTSWALVCDIYFLEPQALREGETPQEFAGRVQAMIAKYANLRIVPWDGYLKYYNLGEKNPGLIEKRRR…
>CRv4_Au5.s6.g12864.t1
MAAASVGPSPVEERMPYYKKRVEVFEKFLEREQAKLEAAKAANVAIKVIMPDGKERAAVQGVTTPMDIAKEISASLAKKVVVADVDGHAWDLARPLEGDCALKLFSFDDTEGKDAFWHSSAHLLGQALELEFGVDLTIGPALEEGFYYDCFMGDRTLTEADKARLEKRIEGSVKESQKFQRVVVTREEALSMFEENKFKIEIIQGLPADATITIYRVGPMVDLCSGPHLPSTSYMKAISVTQMSRAFWRGDVKREPLQRVYGVTFPDSKLLKDYQHRMEEAKKRDHRVVGVQQELFFFHPLSPGSCFFLPHGARIYNNLVGYIREKYWEYEYEEVITPNIYNFDLWKTSGHADHYRENMFSFDIEKQEFGLKPMNCPGHCLMFANRTRSYRELPLRLAD…
>CRv4_Au5.s6.g12868.t1
MKRPDTLGDRIWRSVDKSVDQRYRGVLLVVSIPVILILAVITLVPRSTPFHAERTHTLKELRHTGAAPKFAIVFDAGSTGSRIHVFKFEQAGGELKLISDTFEQLKPGLSSFADSPEKAAASLQPLIDTALKTVPQNLQSSTPISLKATAGLRLLPGDKADNILKAVEALLRKQPFKLAPGGVAIMDGKDEGAFAWLTLNYLLGRLSGPVGKTVAAIDMGGGSIQEAFALEDTNAKLAPTDYVVQLHGGGKTFNVYVHSYLGYGLMAGRAKLIDAGEKGKPHSCIHEGAAGTYAYAGKEYTFSGGETDFDACAEIGGSALQANLTCGTKPQTECSFNGAWRGNGLSKGRDYFVSSYFWDRASETGIIEDEQAAMWEVTARDFADKADEVCVQSVDDIGK…
>CRv4_Au5.s6.g12872.t1
MALSAQQTRQVASARSSRKAFAPARISRTRAAVVVRAEAQNADALTRRAVLSAGLATAAAVSMPISFPAPAQANQLLSTEWELVNLPVSQGTVLLDIGFTDDKHGFLLGTRQTLLETNDGGKTWAPRSIDAARDEGFNYRFNSISFAGKEGWIVGKPAILLHTSDGGANWERIPLSSKLPGAPVRITGLAGKPGQAEMITDQGAIYVTDNTAYTWTAAVQETVDATLNRTVSSGISGASYYEGSFSNLARSSSGDYVAVSSRGNFYMTWSPGQTYWMPHNRPAPRRLQNMGFTPAGEVWVTTRGGDVLVSEDAGLASEKFKDVTINSRGFGILDVGFRDDKVAFACGGSGSLYRSEDGGKNWKRDRSTDDVAGNLYAIKFFNPQLGFVLGNDGILLRYT…
>CRv4_Au5.s6.g12873.t1
MPSALLPLHARATTTSVACRAASIDKPVVYTPRDSSQQSSNGAGEVSMSISSMDEVGPSYEGIITDAPTRPTGLYVRVRNMVKHFSTAKGLFRAVDGVDVDIEPSSIVALLGPSGSGKTTLLRLIAGLEQPTGGNIYFDDTDATNLSVQDRQIGFVFQSYALFNHKTVAENIKFGLEVRKLNIDHDKRVAELLALVQLTGLGDRYPRQLSGGQRQRVALARALASNPRLLLLDEPFGALDAVVRKQLRTGLREIVRSVGVTTIIVTHDQEEAFDLADKVVVFNRGLVEQQGSPTEIIKRPRTPFIMKFVGETNVVPATSLLAKRMRFNTSKTSVMFRPHDIKLFKTVPPESGEGALTTVGANVADKANLGWVVKYTLRFDDDVECELQLSRDQDEREYN…
>CRv4_Au5.s6.g12899.t1
MAVLKLQAALALALLPALALAARPALLPGATLQRHDGAAQQQLQQAIRTSSSTGGSSSLAKGNDRDKDHPNDANMRPIIGILSQPGDPAPDGQSYIAASYVKWLESAGARVVPILYDMSPQQVEDRFDVINGLLLPGGGATLAPGHRFYDTARQLVDLAVAANDNGDYFPVHGTCLGMETLSVILSANYTILSPFDAEDAPAPLLYTADAKDSHLLRSLPADVVENLQNKPIAMENHGMGLSMTALVENPDLGKFFKVLSLSLDKSGAAYISTLEGRKYPFTATQWHPEKNAYEWTPHLHIPHTTDAIRMSQEVANFFVSEARRNLHKAKNILEEDDVLIYNWKPEFTGRHAYVGQEKDFEQAYMFEKSDPQRDGVDHA
>CRv4_Au5.s6.g12901.t1
MSECVYKKVEGIGHVAVAAKVSEFASAFPPGWIQLESLQITLSDIPQHYMIATTPTSLVVAFMGTKRWEDLLADANLLHTPVWAESAALAADASSIPAAHRGFLERARAIHVEQLYELAVSRGLRLVLCGHSLGGAVAKLCTLRLLRELPDWPRPRVRCIAFATPAVGNAALAEMVANAGWADHFASYYLPEDQLVRLISFSQARTPTPSSSPSSPSASASASASGDVAAGVSDAESAGSGAGRPLAAAALRQREQLQVENGGLPRVESSSSVGSTASLASTGSGSLLGSAGSGSLLGTAGSGVWSPWTSSVDGSGGSGTPLARRSLSLPVSRSSSLTGLQSAAAGLARLTHTESLDEEQAGAAMEEILAPGPDALEAAAAPGGVAALAAAAAASHGAA…
>CRv4_Au5.s6.g12919.t1
MQRGRESRKRPVALLQTLLLGALVLVAVVSLNYSLPHAGRGPARAGAVDTSGTGIGTHQLAGRKLGAGESHQHAEAGKKRATMEASADAGLTVQLHCADQASDCELRRHRGMCSMNLTHDFDTCLATCGVCPALALALRASMDLTAAQLRVTRARGPPACADEHEVVCAAMVADTDSGSACEASPPAVLGACKATCKACEPQQAATADSGSGSDGGGSGGGDGGSGEAGCFDAADMCGWWAAHEPRICDRAAADMQRWWWVAVACRRTCGLCGGGGSGGGGSGGAGGGAAAGSAARLRAAASYGVQVGEDVDGTPRVAPYEALPPEPNSCKDKETKCSEWVAAGECARNAGFMADACAASCGTCPVALNLPRPLAKVRLNNGVLMPTVGYGCAGLGESA…
>CRv4_Au5.s6.g12982.t1
MSEADLASLSVEDSQASVGSKPDAEAKKAAKAAEKAAKEAAKAERAAQRGQKAAVMTQPDPEDPLKDKYGDYPMVQSQGQTTRKWTEVEQLEKELADQTVLVRARIHNTRGKGKSAFLVLRQRTATVQAIMFADETTVSKGMVKYATQIPKESIVDVEGIVKVPEKSIDGCSQKDVELQVTGIRAVSRAAVLPFELVDAARSEEEVKAAAERGEVMPTVGQDLRLDNRFLDLRTPANQAIFKVQSAVCQLFKTTLLAEGFQEIHTPKLIAGASEGGAAVFRLDYMGVPACLAQSPQLYKQMAICADFNRVFEIGPVFRAEFSYTHRHLCEFMGLDLEMAIHEHYFEVLDVIEKLFGAIFNGLATTYAKELAVIASQYPFEIPTFKPLRLTFPEGIAMLK…
>CRv4_Au5.s6.g13001.t1
MYSGVAPPIAGVGPKAGTQRVVNRLTLALHASVALVALSIAFVLFDNSLFAWHPAFMSIGYIVFMTEGLIAAIHFRHIDGPDRVKAIWSHALLQIRALVCVLIGFGVIYRNKILLGKPHFMSLHAKFGLATLILSVLMPLWGLVSFRRMGIIQKFPERWQPRIKALHRQLGLLTWLLALVTIELALPHPAVAKGRLTQAWQAGVALIGVLLLGLSLKAVVTPKSLGGAEDPLSKTV
>CRv4_Au5.s6.g13040.t1
MASSMGRALQPGMSGAQRSVRKGANRIRGAQGPRTVPLLGLKALRKEDAELLKEAESYMSPEEHAELRRLLEENQRLRQVVTTSASQMSAQQLERFTAEYSNLAAAAEQAGLAVDQQLKQQITAPQAASASRSSAASSTGRFEAAAGGSGYGYGRSSVSVLVAEPPSAPPAAASPPSYGASGSGGGGGGSPKGGATAFEVSSRDYAKDMASLSVELDATIDDEEEEAPPRQVPEASTRTQPYAAAASRFEALLSERRPAGATVNGAQAQMLEAREKKAASSSSSAGGVNGAAVNGAAAADEQAAKEAARAAAVAEVEGHRAVDVVAGREHWMIITVPEKPVAGAPLQMYFNRNQSEKLRNRPHIVMQYGFNHWELQPEAGNSLDLFPAPTPKSDVTDFW…
>CRv4_Au5.s6.g13056.t1
MASNGAAPDRWSNVKRVYTRQDVEKLRGSIKIEYTLARLGAERFWNLLHTEDYVPALGAMTGGQAVEMVAAGLKAIYLSGWQVAADANSASQTYPDQSLYPVDSVPRVVSRINNAFQRMDQMQHSEGRGDTYWFAPIVADAEAGFGGNLNAYELMKALIEAGASCVHFEDQLASAKKCGHLGGKVLVPTKEFVQKLTAARLAADVMDVPTLIIARTDALGAYLLTSDADEYDKPFMTGERTAEGFYCVRGGIDAAIARGLAYAPYADLVWFETSEPSMEEAKKFAAAIHAQYPGKLLAYNCSPSFNWKKKLSDDEIAKFQKTLGSLGYKFQFITLAGFHSLNYGMFSLARDYASRGMSAYAQLQEAEFASEKQGYRATTHQKFVGTGYFDLVSTVITQG…
>CRv4_Au5.s6.g13061.t1
MALSMRTLSARTAAPRGFSGRRVAAVSNGSRVTMKAGNWLPGSDAPAWLPDDLPGNYGFDPLSLGKEPASLKRFTESEVIHGRWAMLGVAGSLAVELLGYGNWYDAPLWAVNGGKATWFGIEVPFDLNALLAFEFVAMAAAEGQRGDAGGVVYPGGAFDPLGFAKDSSKSGELKLKEIKNGRLAMVAFLGFVAQHAATGKGPIAALGEHLANPWGANFATNGISVPFF
>CRv4_Au5.s6.g13068.t1
MSSLLLSRRASAQGLFRRETPSIAWAHGRCHRAPVRHRPASRCGAAPVLAVTIQDTVRHFLPFQNGSPAPGNVTKLEDEGLFKGQVVYSKFTWPVVLGGEEVYIWGSFNDWSKGVRLHKVDRNTDATVILPLRPGTYEFKFVVDKVWTPAPHEPTVTNAEGHLNNFRVIAPTATFTLKAPKADSVLVIGDWDNWQYSLMLQKDPATGVFTAKAHLPPGQYSYVYVVDGNVVTDPGLQTYPDAEYGDVHRIWSFLPDLFRVFYCTGWEEAVLNYRRVVNGQPLTKEWQQLTMVNAPSRGNSLGVWKMATIVPTDPAEVLEFTLNNGVPAGDVARFKEDRPGSGPVYSCPFPGSFKLAKGMLRPFPRGAEARIMLVSDIDGTMIGDMSSADVFTTSERFAD…
>CRv4_Au5.s6.g13079.t1
MAFALATSRKALQVTCKATGKKTAAKAAAPKSSGVEFYGPNRAKWLGPYSENSTPAYLTGEFPGDYGWDTAGLSADPETFKRYRELELIHARWAMLGALGCLTPELLAKNGTKFGEAVWFKAGAQIFSEGGLDYLGNPSLVHAQNIVATLAVQVILMGLIEGYRVNGGPAGEGLDPLYPGESFDPLGLADDPDTFAELKVKEIKNGRLAMFSMFGFFVQAIVTGKGPVQNLDDHLANPTVNNAFAFATKFTPSA
>CRv4_Au5.s6.g13094.t1
MDAPSTSNGTSTSAQDAAAQKQPVRRAPLGIDTINKRVIKSEYAVRGEIVQLAQKIAKEVESGQHNHPFDKVVWCNIGNPQILGQKPITYFRQVLALCECPQLLSHPNIRELFPEDVIARAQLLTKQIPGGLGAYSESAGALIIRQLVAASITKRDGYPADPDNIYMTDGASPAVHYMMDLLLREPTDAMMVPIPQYPLYSATLTLYGGTLAPYLLDEGAGWGLDVEHLRLQLAKARREGLCVRAMVVINPGNPTGQCLSYQNMRDVLTFCRDEQLVLIADEVYQANIYVGNKEFFSFKKVACAMGLEDQVPLVSLHSISKGFIGECGRRGGYMEVTGFPEPVKDQILKLASINLCPNLSGQICCALMMNPPQPGEASYELYRKEKSDILGSLKRRAEL…
>CRv4_Au5.s6.g13125.t1
MSLNANAAPSGPAKVPLFMLASAAETSASAPPPGTPMWRLAAANLAAGATAGCAVELALYPIDTIKTRLQAMIGGGGLKALLQSGGGKGLYAGVWGNLAGVAPASAIFMAFYEPTKQAVQAEVSADKQYLGPVVAGMVAGTASSLIRVPTEVVKQRLQTGEFKGAITAIRTILGREGLRGMYAGYGAFMLRDLPFDAIEFVAYEQIKKAYGASVGRELNPGETSLIGAFAGGFTGVITTPLDVLKTRLMTQGASGRYKNLFDATVTIARTEGMGAFMSGWQPRLIWISLGGFVFFPVLEAAKKFYAPK
>CRv4_Au5.s6.g13154.t1
MPPAVRHWAPEHKWVNFCGHKLASPLGVAAGPLLSSEWVALAADRGYDCLTYKTIRSHAHAGHGLPNVMFLSVEEEQQLEATGLSCQQPLNARAPYPPGVPLASPAAATAAAVATAKAAAATGACLSSSSLSLSTSCSTPISPLAITNSFGMPSQGPEQLARDIPAAAAALRPGQMMVVSVTGTPGRPGLTFTQDLVAAAAVAVDAGATCLEVNLSCPNVGRSHVALYADGPAVEATVRDLRLALQQRADAAAAAATADGAAAQPRCGGVVPPIALKVGAYPDADSLRRVAQCAAAAGAAALSGINGLSRRVELPAALGGGPALGADRPTSGVCGDPIRAAGLDFVASARQVIAAGSLPLQVIGVGGVTRAEHAMHYLQAGADIVQTATGFMWCPDLGL…
>CRv4_Au5.s6.g13173.t1
MPRGQGKRLAQLLGAQLKQYAAEVRGISTAGGASRGGARGPASPSSLEQQTRQVAQVAVQQSTQQAVKVVVPAIKVDLVGAVSSVSESDKVEPGVFKNVDGHRFEDGRYAAFVEEITKFIPKERQYSDPVRTFAYGTDASFYRLNPKLVVKVHNEDEVRRIMPIAERLQVPITFRAAGTSLSGQAITDSVLIKLSHTGKNFRNFTVHGDGSVITVEPGLIGGEVNRILAAHQKKNKLPIQYKIGPDPSSIDSCMIGGIVSNNSSGMCCGVSQNTYHTLKDMRVVFVDGTVLDTADPNSCTAFMKSHRSLVDGVVSLARRVQADKELTALIRRKFAIKCTTGYSLNALVDFPVDNPIEIIKHLIIGSEGTLGFVSRATYNTVPEWPNKASAFIVFPDVRA…
>CRv4_Au5.s6.g13196.t1
MAARPLQGPRALLPVPTASTAAPLRATAQAPASTSSSAADEGDGLGVIAVDPALANFKGHLEYRWAQYRRTLDSITAGAGSLAAFAEGYKYFGFNREDGAIVYREWAPAAQAAALIGDFSKWEPVWMTRDEWGVWSVRLEDVDGKPAIPHRSRVKVRLQHPHGWWMDRVPAWIKWAAAEQRMDAKYDGIYWDPPAAERHQWRHQRPPRPAALRIYEAHVGMSSETGKVASYSEFTDTVLPRVQALGYNAIQLMAIQEHAYYGSFGYHVTNPFAVSSRSGTPEELKARAGGGMRGPACGAHERALIDEAHRRGIAVLLDVVHSHISGNQDDGLAGFDMGQREQDNYFKQGEAGYHKLWDSRCLNYANWECQRYLLSNLRYWLEEYQFDGFRFDGVTSMLY…
>CRv4_Au5.s6.g13229.t1
MLQMSKISGGISNLLVKVEPPAPLQAVAVKVFGDKTELLIDREAEKHTLLRLNAVGFGAPVVGLFGNGRIEAFLPCKTLTPEEMAHPGFVPHIAARLRAFHDLPGMDSAFPTASTINSTSASASAPTSAAAAGAAAATAGPQPHAPSPQSSQWDAIFGWLDMAEQLSFAHDPAKQAAFDKVDFAAMRAELAQLKELCDRVASPRVFCHNDLLSGNILVIAPSASPAAAAPEPSASDGAATMSGVEDGGDVLGGGRLQFIDFEYSCAGPRGFDLGNHFNEYAGFDCDYTRFPTLEQQAAFFRHYLKPGELQALATAARARRPAELGAAAPQAAAEAAALEALAAEACIYALASHAYWGVWSFIQARYSPIDFDYLDYSALRWAEYHRRKAEFVALVDKNF…
>CRv4_Au5.s6.g13230.t1
MTASSAPTVAPTVKLTINTKEGPTVELDVESGDKLRDVLMANKVKSGADILTERTGAEKKKLSGKPESFRLACQTLVGDGENSGAVTIATKP
>CRv4_Au5.s6.g13244.t1
MGYGGEGHHRPPGEPGHVRTLGLLPLVTLIFFEVSGGPFGTEDAVSAAGPLLTILGFLVFPLLWSVPEALITAELATAFPENSGYVAWVTAAFGPFWGFQEGLWSWLSGVTDNSLYPVMLAANLEIFFPQLESGWPRICFLVGMSLLLSWLNYRGLTVVGHAVVTSTVAIVLPFVLLCALALPRANVKNFTKVDWDTVDWPTFLNVMFWNLNYWDSVSTLAGEVGGGWRVRDPGRTFPRALLLAVVLVVAMYLLPTVAALGVTAAAGDWSLGFYGYVAQQVGGPWLALWVVVAAACSQVGQYQAEMASDSYQVQGMAERGFLPKALGRRSRHGTPVYGILLSSLGVLCLASMSFVEIVTLLNAIYCLAELLEFAAFVWLRIKQPHLLRPYRVPLPVWGL…
>CRv4_Au5.s6.g13269.t1
MASAAAPEGAKENRARRDLLLNIQHSVQKQWADEKIFEADAPKGKLSALSGQGPVYLLAATLRPETMYGQTNAWVLPEGQYGAFRGLDGEVWVCTQRAALNLSYQERTPTRGSPELLLELSGQDLIGTPVKSPLCPHERVYVLPLLTILTSKGTGVVTSVPSDSPDDYTALQDLKKKPKLREKYGVADEWVLPFEVIPIIDIPGFGNQAAVKVCDDLKIASQNDTAKLAEAKNMVYLKGFTDGVMAVGPYAGRKVSEAKPIIREELVAGGGALMYSEPERTVMSRSGDECVVALTDQW
>CRv4_Au5.s6.g13273.t1
MSVYLLAVVTDDQDEVLGSADPAYMPALHRLIGASGSRFANTLVSTSVCCPARVSLLTGRLSHCSNVTANWYPAGAFGKFARSGLDGDWLPGWLQAAGYHTVLVGKFLNSFGVPLPAGVVCPRGWDSFEALTTGTYALYNSTFSLNCGPSTPPLSGQYQTDLIRDKALAYIDTAVAARKPLYLHLTPATPHKDNNGEGWVPPPPAARHAGLYPGLQLPANPTLRTPNPLIPDTRIDMTKAQSVQQMTDLYVARLRALRAVDEMLEALVNRLEARGILNNTYIIFTSDNGLHMGQHSLLDGKGTNLEEDNRVPLFIRGPGVEAGVVSPYQANLIDIPATILALAGLPQPRGLDGLPLPLPGLTTDLYDQALRAAVATTTSAPASLTYPSSGVRAAAAGSN…
>CRv4_Au5.s6.g13274.t1
MLKRVGQSLVPFARAGLTQTAESFRGVSSQFFDAPNGPSVKQVLIEDEWYNRQRSIFPLLDKEPYYPVDVFVAPNAVVCGDVDIYGGASVFFGAVLRGDLNKIRLGNRSAILDRAVVHAARAVPTGLNAATLIGEKVTVEPYAVLRSCRVEPKVIIGARSVVCEGAVVESESILAPNSVVPPARRIPSGELWGGSPAKFIRKLTDHERDRVLDDVSTHYHNLATMFRREALEPGTAWRDVEAWRQKLVDQGEYEWINFREQKYLMRLQHEAEALEKLTH
>CRv4_Au5.s6.g13292.t1
MQALSANRNAVRPVAKSTRSVVSVARPFGTKCVRPALGRVALKAMNQQATEEKSDTNSAARQMLGMKGAALETDIWKIRVQLTKPVTWIPLIWGVACGAAASGHYQWNNPTQIAQLLTCMMMSGPFLTGYTQTINDWYDREIDAINEPYRPIPSGRISERDVIVQIWVLLLGGIGLAYTLDQWAGHTTPVMLQLTIFGSFISYIYSAPPLKLKQSGWAGNYALGSSYIALPWWAGQALFGTLTLDVMALTIAYSLAGLGIAIVNDFKSIEGDRQMGLQSLPVAFGVDTAKWICVSTIDVTQLGVAAYLAWGLHEELYGAVLLALILPQIYFQYKYFLPDPIANDVKYQASAQPFLVFGLLTAGLACGHHVNAVAAAASAAGAL
>CRv4_Au5.s6.g13296.t1
MALKSATRLQRAAARSEALVAALPASVRASTVVASAMRQAFSSAKPAGLTKSVSARKPASGRALSVKVSAVNGSGLKVDLRGKKAFIAGVADDQGFGWAIAKALAEAGAEISLGVWVPALNIFKTSLDKGKFDESRKLSDGSLMTFSHIYPMDAVFDTMADVPEEVATNKRYAGNKAWTVSEVAESVKKDSGNIDILVHSLANGPEVVKPLLEVSRKGYLAALSASSYSLISMVQRFGPLMNEGGAVISLTYNASNRIIPGYGGGMSSAKAALESDTRVLAYEAGRKYKVRVNTISAGPLGSRAAKAIGFIDDMIRYSYENSPIQKELAAIEVGNVAAFLCSPLSSAVTGHVMFVDNGLNVMGLAEDSKTLERS
>CRv4_Au5.s6.g13302.t1
MGDPAVRQQPRDGMTAFLAAVNDLTKWAVSAAVFAVLLVRRDTAVAWCVLGSIIASFINKALKYIINEQRPANARKADPGMPSSHANSLAFLGAYTALALAQGAASPTSPAGLGAAGVLALSLFLTWLRVRLGYHTTPQVVVGYGLGAATAAAWHWAATHHVLEALQERPELRAAVYGCTGVAVALFAVRNVLAWFKEKDHDKKGAKTA
>CRv4_Au5.s6.g13306.t1
MALARAFASVAAVARQGESKLSFASRAFASSTTVNGVPVEVHNEGGSKRVVVTKTLPGERWLQFLINAGCRVEVSQHPDIILSNATIKQLIGTKCDGVIGQLTEDWGAELFEALKQAGGKAYSNYAVGYNNVKVDEATKRGIPVGNTPGVLTETTAELAAALTLAAARRVPEADVFMRAGKYKGWLPNLFVGQLLQNKTVGIIGAGRIGAAYARMMVEGHKMNLVYFDPYPNKQLEEYIRLYGELLRHRGEPPVACKRVETVEEVLKEADVVSLHCNLDASTRHLINSQRLALMKPTAVLVNAARGPCIDEAALVAHLKANPEFRCGLDVFEDEPAMKPGLADCANAVIVPHIASASLWTRSGMATLAAANVAGILSGYPVWNKQDILGFVDKPLAAAP…
>CRv4_Au5.s6.g13321.t1
MPMLLLLQVEELRGQGQEPYAYRFDRTHFTTELQEQFAALENGAHDESGAVVSVAGRVVAKRVMGKLSFLSLRDDKGQIQLYVEKAGLDAQQPGGFDLVKGLVDVGDIVGCTGGLKRTDKGELSVVATGLQVLTKSLQPLPDKWHGLADVEKRYRQRYLDMIMAAEVRDTFRARSKIISCIRRQLEDRGFLEVETPVLESVAGGADARPFRTFHNTLRRDFTLRIATELHLKRLVVGGFERVFELGRIFRNEGAEVEAGAAGGGAAEEGEGEEGRGWAEEGVSSRHNPEFTSVEIYQAYADYSDMMALTEDLVRACALAVKGSTQISYQGVDIDFGAPFRRASMAQLVQEAAPGLDFEALMAAGREAAAAGGPEAAAAVLAKAKQDAEAVLQAHENKEV…
>CRv4_Au5.s6.g13324.t1
MLLSRGPARSRVGASGPLAVALRRLFSSAPEVSQAESSAGALKEFRAQVQEFAQQAIAPHAEAIDRENDFPTSVNLWKELGSFGLLGITAPSEYGGLGLGYSEHCVAMEEISRASGAVGLSYGAHSNLCVNQIVRNASPAQKAKYLPKLITGEHVGALAMSEPGSGSDVVSMKCRAERVGGGADERYVLNGNKMWCTNGPKANVLVVYAKTDPAAGPRGITAFLIEKGMKGFSTAQKLDKLGMRGSDTCELVFENCEVPAENVLGGVGRGVAVMMSGLDYERLVLAAGPCGLMAAALDAALPYATQRKQFGQAIGEFQLIQGKLADMYTRLQSSRAYVYAVAAAADSGTPADRKDCASVILMAAENATQSALDAIQILGGNGYINDYPTGRLLRDAKLY…
>CRv4_Au5.s6.g13328.t1
MFTGIVQGTATIAKVDRQDKFSSLEISFPAGKADGVKIGASVAINGTCLTVTHIAGDTLGFDVMMETLRATNLGGLQQGSVVNFERSARVGDEIGGHNVSGHVHCTASIAAVEQTENNRRLTFQLSNPAFMKYVLPKGYIAVDGCSLTIGEVWEDKFSVYLIPETVRVTVFGVKSVGDSVNIEIETQTQAIVDTTERVVAQYLEKLQGLPAAAAK
>CRv4_Au5.s6.g13383.t1
MLVHRQCTPVRVQPPKHLARRAVLLPARRGVAVARAEAAPGLVATEAPPHAITLTPEALVQLRKLRADFKEQSEAMLLRVGVKQGGCSGMSYVMDFESQDKVTDDDHVISYDDGFRLVVDPKSLLYLFGMQLGYSTALIGGGFQFQNPNATDSCGCGKSFGV
>CRv4_Au5.s6.g13391.t1
MRCQLSQRSSRVQARPAPTAAPWRPALKLRRASTEVRIAQIDRPADASFERRAESSPGATTAAELERLVEATISEEGGVQTLTDIWRRNAVTYGDKLAVRDPHHEGSPEMTFSQLYEAMQDFAAGLSGLGLQPQDRVALFSENSSRWLVADGAVMAAGGVDVVRGATAPPEELLFIGQHSGAAGLVVQDGAALARLVAAAAEHERAEEVNPLHDLRFIVVLWGEPLTTTTTTPDNSSSSSSSSSSSSSSSGTAVPPRCPVLSYSQVLGAGAAARAAGRWQPAAVSPADLATLVYTSGTTGHPKGVMLTHANLCYQVRNLSHFLQVRPGDRVLSLLPPWHIYERTCSYFVLSSGGQQVYTNIRRLRDDLVAHPPDHLVCVPLVLDTLHARVVQKIQAGPR…
>CRv4_Au5.s6.g13409.t1
MLMNKSLSARASARVQPFRNSKAPVLRRPRSAVAEMQATSTSYELDPDNASILVCGGGGVALSVTRKLKDMGSWVWMMQRTDVRKAEIEKMMAFVPRGDALNKDDVQKVMDGIEEVDAVVCTLGGSVADPRVDSEGNINIIEAAIKKGVKKFILVTSVGCGDSKEAPGEKVYNVLKPVLVEKDKAEERLKAAGASGAFQYVIIRPGGLVSEPGTGKAILTEDASASGMIAREDVATLVCKALFSKKADGKVLTAVDLTRTPGAPERAVFQL
>CRv4_Au5.s6.g13482.t1
MGLFNYFVARADAEVVEEEHAPPPPPPPPKKSSRKPTLESLSADELEELKNEVVSEVVDKIAGEDGTKLADFLEPELITAPYDPRFPNRNQARHCFVRFNEYYKCLYERGEEHPRCQFYQKAYQSLCPSEWVESWQELREKGLWTGKY
>CRv4_Au5.s6.g13513.t1
MIITYYALCSSLMLVVNKLLVAVVVVLSGDALGWIKVDKLEWDKVQKFALVVGGFLGTLFANIKVLQYANVETFITFRSSTPLLLSVCDYIWLGRALPNARSWGCLLLLLAGSVGYVLVDADFRLSAYTWLALWYAFFTFDTVYAKHVVDTVQMTNWGRVYYGNFLALIPLAVMVPVMAEHNILAAVVWTAPKAFILALSCLMGVGMSHASYLLREAVSATFFTIIGILCKVLTVIINVFIWDKHASPEGIACLMVCVVAGTFYQQAPRRQPQAPVVSNADSGAAGQAQKQSGAEVPKQASGSRNSSSGGPPADATGGQLLQERQSLLPKTTSSQLASRPSVSNNSHR
>CRv4_Au5.s6.g13522.t1
MALNMRVSSSKVAAKQQGRISAVPVVSSKVASSARVAPFQGAPVAAQRAALLVRAAAATEVKAAEGRTEKELGQARPIFPFTAIVGQDEMKLALILNVIDPKIGGVMIMGDRGTGKSTTIRALADLLPEMQVVANDPFNSDPTDPELMSEEVRNRVKAGEQLPVSSKKIPMVDLPLGATEDRVCGTIDIEKALTEGVKAFEPGLLAKANRGILYVDEVNLLDDHLVDVLLDSAASGWNTVEREGISISHPARFILVGSGNPEEGELRPQLLDRFGMHAQIGTVKDPRLRVQIVSQRSTFDENPAAFRKDYEAGQMALTQRIVDARKLLKQGEVNYDFRVKISQICSDLNVDGIRGDIVTNRAAKALAAFEGRTEVTPEDIYRVIPLCLRHRLRKDPLAE…
>CRv4_Au5.s6.g13523.t1
MASMTASLRSSTLASTSAPSAVRPVMGSRARSVRVHASDAFCRDKVSAVRGVESKGISYKVTFVGADGETREISCPDNQYILDAAEAQGLDLPATCRGGICGACVARVAKGTIDPSDIADLTFTLDEEEQAKGMALLCMTRATSDLTLETQSDWGYSLGVGEWKGATGKFSSRPEPTMGKGWAELQK
>CRv4_Au5.s6.g13524.t1
MEAKSRQWSPEDPEGNIILTVAENRISSDIVRERLSQAAADFPEEALTYQDMRGIPALRQGLARLLERTFMKGISVDPDQLSVSAGAGAVIENLFHCIAGPGDIVLIPAPYYPAFDNDLQVKCGVVPWPFHLDEDRPLGPQLNAAAEAAAAGSNGAPESGSESNGSRRPRVAALLYTSPNNPLGTMYRRDTVVELLRWCLEHEVHCVSDEIYGNSVFGEGASFTSAEVIARQEAAGLPHPARLPDLLHVVWGLSKDFCASGLRVGCLHSRNTQLNKALDNLGYFCAVANPVQWGLAAALADGDWLRHFLDTNRARMAAAYGQLEAALNEAGIPHVKADSAMFCWVDLRAWLPAPTWEGEAALWEEMCTACRVLLTPGEQCHAAEPGFFRVCWAWMPGDS…
>CRv4_Au5.s6.g13538.t1
MIDEDRFDTQYPESQAEEPSSSGSGCPVYVMLPLDTVWVVERDGKRISVLKKERSLDIALHTLKQAGVEGVMVDVWWGIVERAGPRQYDFSAYKRLFYKVAAAGLKVQAVMSFHAAGGNVGDTCKIPLPKWVLEIGERNPDIFYTDKAGHRNRECLSLGCDEVPLFWGRTPVLMYRDFINAFADKFQHLFGTVITEVTVGLGPAGELRYPSYPEGDGRWRFPGVGEFQCYDKFMLESLRRTAEAAGHAEWGLSGPHDAGHYNSSSWETGFFVSQNGSWNTAYGHFFLSWYSNMLLEHADRVLSSAAEVLNKHGRPRVFNSMRDASNGHVIYEFTPACKMGIKLAGVHWWFKSRAHAAELTAGYYNTRDRDGYLPFMAMLRRHDASLSFTCVEMRDCEHP…
>CRv4_Au5.s6.g13541.t1
MEAPPDSNQNEDALAVVAVKRDRRAGNIVTDSAAALLSSSLFSTMFYPLHRIKILLQTQDSNPLITSGQVRRYTIVDSVPRLLREGGVRELWRGNGAYMLRHVPSTTLSFAFKDALLRHVLPHIDLAPPPPPPPQPSPPDAAVAGGGRGASGAAAGPGPGSIAGAPGWSRVDRERLEAERVARDREGMKRFAAATAVNLAAGFLGGAAALLLVYPLDFATIRMASELRKQKKSIGMLETLKSTQRAGGLRALYRGYGVSALAIGAYKSLYFGLYDTAVAAMEQRNARRAAAAAAAATGGTAQSPRLAPHHLVPQHLHSHAAHAAAPSHALHAHAAHHGPTVLERWAAANVVVLAASSITYPLDVVRKRLVADTAMGPGRQQFRGFMDCVTKIVRTEGLP…
>CRv4_Au5.s6.g13556.t1
MRGLLLASLALALLLGAALLNVADAGKAHAPGQQKKKSPKPKPSPSPKQKPMNPFAKLPRNRYVMSADTCAPTCPINTAKPLCALFEDAAYAPADAGAADCSTLVSESGLTQIAVAGGRLTAQHGADALLSTIWPLEAEDEGVAVAAVAPNGKGSWGIKLANGTTVDGPAYFSRELGTGCLKPKFGGAAAGPFYLLAYEGQGLEDNTLRLVNAKRQPVWRSGSCDGSSGDGSH
>CRv4_Au5.s6.g13557.t1
MDVAASSGQIDIVSLRNRKHGTYTHKYTPRDAMLYALGLGCSTTCPGDLRYIYEGAGRSGAAGTQGGLGGNQQQAGREAGDAGEFAVLPTYAIVAAHPALGLVPLESYLPGGLDRAGALHGEQYLQLLAPLPAEGGQLVSRPELVDMQAKGKGLVVVLRTVTTDAVSGRDVAINEFTTFILGKGDVRTPWPPAPRLPAAVAPNEPPARAPDAVAELATSRDQAALYRLSGDFNPLHIDPQVSARVGFQQPILHGLCSMGISVRLVLRRFGGDDPARLKSVKVRFAKPVLPGETLRVEMWAEPSAPPPDTDTSADSASASMLSRREAAPLKVVFRTWAVERKALAIANAAVELHPEGPGAVGAGVAPRPRL
>CRv4_Au5.s6.g13565.t1
MMLKQGVQQRIAAGATQSTRSCVVEAHAQASSRQVITPFAPRASGKTACLGFARSAASVSGGRARSLVVRAAASASPFPKRNARLVLEDGSVWHATAFGATGTEIGEVVFNTSLSGYQEIMTDPSYKGQFVAFTCPHIGNVGINLEDMESTKCHLGAIIVRDLSCVVSNYRSRMSLDEYCKKENVIGLANLDTRALTKVLRETGCLVGVVTTDASKTDAELVTMAKGWTIVGKDLLSVVSCTEPYEWGKGTTDEWEFNHRAKLNKQHGPFHVVAYDFGIKTNILRRLASFGCRITVVPATYPASEVLKMNPDGVFFSNGPGDPSAAPYAVDNAKAILGKKPVFGICMGHQVLGQAFGGKTFKLKFGHHGGNHPIRYMPTGRVEISAQNHNFAVDPSTLP…
>CRv4_Au5.s6.g13574.t1
MQTTMTRPCLAQPVLRSRVLRSPMRVVAASAPTAVTTVVTSNGNGNGHFQAATTPVPPTPAPVAVSAPVRAVSVLTPPQVYENAINVGAYKAGLTPLATFVQGIQAGAYIAFGAFLAISVGGNIPGVAAANPGLAKLLFALVFPVGLSMVTNCGAELFTGNTMMLTCALIEKKATWGQLLKNWSVSYFGNFVGSIAMVAAVVATGCLTTNTLPVQMATLKANLGFTEVLSRSILCNWLVCCAVWSASAATSLPGRILALWPCITAFVAIGLEHSVANMFVIPLGMMLGAEVTWSQFFFNNLIPVTLGNTIAGVLMMAIAYSISFGSLGKSAKPATA
>CRv4_Au5.s6.g13617.t1
MRREPALLAMSLVYLVQGLSDMAWLAEKYFLKDDLGASPAQVSLFLSLASVPWMVKPVLGFISDSLPLWGYRRRSYLLLASVAAAGSWVYLAVGASSLAATLWAMVLGSGAVALSDVVVDSMVVEKAREEEQDSAGNLQSLCWAAYAVGQVATAALSGSLVEAQGPRFVFGLTAAFPLLIGAASLMVHEERVSTEAALRGLTASIEDTWSSDDDEADWEPGAGGGGGGAGWEAAAGAAGGAALAGTSLPVAAVVVAAEAEAEQATQSSGRSAAADWGQAGTTFTTITSPLDSWGPPAAPLPGSPCLGGLAPPAPVDVGAAVTPLALLPEISSASSSSSSSGGGLVLSLLPPPVPAPIPCPTTAALHTTPASPRGRHRRPGGSRTHKPLPSPSALAAATA…
>CRv4_Au5.s6.g13618.t1
MLPCLGPGAQPNLQRLISAVQTTFAARLSSLSGAALVQADAATPALPGHTRLNLCNAVNDALKIALESNDRTYVFGEDVSFGGVFRCTVGLLERFGKERVFNTPLSEQGIVGFGIGLATAGHTAVAEIQFADYIFPAFDQLVNEAAKYRYRSGGHFHCGGLTVRAPCGAVGHGGHYHSQSPESFFTHVPGLRVVMPSSPAEAKGLLLASIRSPDPVVFFEPKMMYRTAVEDVPEGDYMLPLGVARLVAEGSDITLVGWGQQVLVLQQAAQLLAGEGVSCEVIDLRTLAPWDVESVCASVSKTGRLVVSHEAPVTGGFGAEVAATVAQRCFTRLESPPLRVCGADTPFPLVFEPLYLPGVARVADAVRQALDF
>CRv4_Au5.s6.g13629.t1
MGQTAGEVDNPVKAVLLDLDGLILDTESLCVEVARSVVERYGKDLTLEAQRAALGKRPLECWASVAEILALPVPAEQLLAESEPLLAARWADAPLLPGALRLVRHLAASGVPFAVATSTPRATFNSKMSRKPELRQLLAERPGAVVVCGDEVTNGKPHPDVFLAAAAGLGVPAAQCLVLEDAPSGAAGATSAGMRVVVVPSLVGVGAEFGPADPAAASGLLQLLPSLLAFCPESYGLPRFHDTLPPAGHPGGGVIPMDRVVRLRGEVVKGFGRGSKELGIPTANVCPAAVAKHLAEAVTGIYAGWARVGQRPEIHKTVLSIGWNPFFANKEKTLEPWILADFDQPFYGETLSLVICGYVRPEANFSSLEDLVARIHADADVSRAALDCPPLAALAADPF…
>CRv4_Au5.s65.g13657.t1
MEQVEAQARALLAQATAHAAPIVDEVAKLALPVAEPVYKAHLQFQEFLSANHNLIPHMAWEESASGTLGLSLSQFRFTLALFASVILVAGVRLFRNPTLRHLYAVATGILIIYYPFGSSIMHVLPMAVAAYLAMLLAPRRAGLIAWCTVFPYLIYLHVVNASGESWKTGNMDFTGGAMVAVLKLISICVCRADSFRKNKEDLSPYQSAHQLTRTPSPLEFVSYLFGLGNLLAGPFYEFSDYKAFMSLKGPWDPKGPSGAGGRRLPPVLLHGLAALLEGLWHMGVYLALTLNGWSMEHYHSDWYYSQPLYIRVGSFCVIGAVYQLRYYFTWKITEASYVFAGLDWQGWAADGKPQWGRCRNCSFLGVWLADSARNVPLNWNIATGVFLRRYVYERVAPAP…
>CRv4_Au5.s65.g13659.t1
MAAMQSLRSAKSVASVRSEAQVPAAVQPRVVAKPLLAGRPAVADSSSLLVGRAARQMLRATAAPPSPSSSSAAGAASTGKPRALISLSDKTNLDMLVKGLKELGIEIVSTGGTATTISNSGVPCIKVEDVTGFPEMLDGRVKTLHPAVHGGILAIRDKPEHMAAIAQHNIGTIDLHCSSYDAQVSEWLWKQVGSGPAPQMTVPLQLEATLRYGENPHQAAAFYTDSSLREAGAGGVATSVVHWGKEMSYNNYLDADAAYQCCCDYTEPSCVIVKHTNPCGIASRADLREAYRLAVRADPISAFGGIVAFNRPVDAELAREIREFRSPQDNETKMFYEIVIAPGYTPDGLEVLKGKSKNLRILEAQPRAPSGLSLRQVAGGWLWQDADSLQPEAITFTCV…
>CRv4_Au5.s7.g13684.t1
MAPYTVSSDQLSALIVFLTDPLDCTPGGSADRYASAVATWWAGPAGASFIRGGGVANILCRVKPRPGAVLGFLGLLALFLIILIRNVFIKLFRWYAAARGSGYVAVATQALRELHASGAFLTSSASWQQQQPLVPEQQQSLEQEGEGGACVPGLALLTGSDLRPVVGAQGGQEQAQCCELCGVVAHGGCFKAVPHNCRLLTLGPPAQPAGSTASASAWSGGGAGADGHRAKGEAEGGAHSAVCGSDLFLAMSLPLPLPLPHDWRPAGTTLDLILPPADTELLVMANNAAGVAQAGAAAAGLISAAGAAAASTSHGPSCLCIYCGEPCEVGLLAVEPVWRCSGCRRFAHVQCWSTLHPGILSAATRAALAGQSLDADDVLVGEQLRRQLLQLLHPLQVVD…
>CRv4_Au5.s7.g13709.t1
MLLAQVSVSRRPVVTYATAAVQEAPAATTAPAKGSQVRVRFAPSPTGNLHVGGARTALFNWLYARKMGGKFILRVEDTDTARSTRASEEAMVRDLKWLGLDWDEGPDVGGAHGPYRQSERTAIYKEMADKLVAEGKAYPCFCTDEELEAMKKDAEEKKLPPIYRGKWARATAAEVEAAKAQGLPYCYRFRVPSNQEVKIHDLIRGEVSWNTDTLGDFVLLRSNGMPVYNFCVAVDDALMGITHVLRAEEHLPNTLRQMLIYQALGFPVPTFGHVSLILAPDKSKLSKRHGATSVGEFRTQGYLAPAMINFLSLLGWNDGTEQEIFSVEELTTKFSLDRITKSAAVFDKVKLGWMNGQHLKQLPEEEAAAMAGQHLVACGLLASADSAFAKAAVKLVSKS…
>CRv4_Au5.s7.g13718.t1
MQCLQKQAQRCGAKNAQACPIKASGVRSSRRAVKALAVAAAPAKKAQASDVNAVGLKDVPLRSLFPDEPKPPAPGAPKLKVAIVGGGLAGLSTAVELLDQGYEVDIYEGRQWIGGKVASFVDKDGNHIEMGLHVFFGCYFNLFRLMAKCGVLENLLVKEHTHTFCNNDGDVRELDFRFYINEMKVGAPLHGLKAFFTTPQLEPVDKLANSLALGTSPIVRSLVDPEGGMRDIRALDGISFTEWFTSHGGSMNSIKRMWDPIAYALGFLDCDHISARCMLTIFQFFATKTDASVLRMLNGSPAERLLAPIADYIKAKGGRIHTRSGCKEVMYESGADGKVTRVTGLKVGSAGRDRVVTADAYVAALDVPGIKKFLPAPWRQYKEFDNIYKLVGVPVITVQ…
>CRv4_Au5.s7.g13810.t1
MQQTVLRASSGAVSGRPTAVPVATRASQRGRVALRPVAAAILNKPDSDEGLTYKKAGVDIDAGDELVDRIKKMNPKANIGGFGGLVPFGDSYLVAGTDGVGTKLKLAFDLNKHDTVGIDLVAMSVNDIITLGAKPLFFLDYYATGHLDVDTAEKVIKGIVDGCNDSDCILLGGETAEMPGFYQKGEYDLAGFAVGAVKKDRVIDGKTIKAGDVVLGLASSGVHSNGFSLVRKVLEVSNTSLHAPCPWDSGKSMGEALITPTVIYVRKVLELHEKVGLKGVVHITGGGMPENIPRVIPKGLGVNVKDGSWEVPELFKWVQATGKVPIDDMRRTFNMGVGLIMVVDPSKVADIQKIAPDAFLLGEVVPGNGVKYV
>CRv4_Au5.s7.g13823.t1
MGHNFLSLEDYTPPDWASGIPLAPSRRFRLGMLPTPIHEWRLPGLPEGVRVLVKRDDLSGMQLSGNKVRKLEFLLAAAAAGGHDCVVTIGGIQSNHARATAVAARYLGLDCHLILRTSRQDVDSDPGLVGNLLVERLAGAQLHMVTKEEYGAVGSTALLEQLALELQAAGKNPYVIPVGGSSALGTWGYLQAIDEIIHQSREMGETITDIAMACGSGGTTAGLALGSHLSGLGARVHAYGVCDTPSYFYDYINGLFQGLGLEVPAGSPGGGAQTRTQPQQGSAEGGAAGGQLLLLQQQQPDEALAVQSLLRAVQARGAGYAISTEEELATVQAVAAATGVVLDPVYSGKAVHALLREVRADPGAWRGRTVLFVHTGGLLGMYDKLDQLGPLVQARGAAV…
>CRv4_Au5.s7.g13848.t1
MIGWINISVESFVREKFGDAVWEQTLSTSGVQAGWVSSCPYPDAATYGLVISASNILGITSAQVLEAFGVYFVEYTARLGYEKLLKSLGSNMAEFLKNLNDLHLHLSMSFPSMAAPAFKCTDVGPTCLTLHYHSHRPALGPIVVGVLKGLAEQYWGLGGEQLQVELLRGRDDGSDDHEVFRVSYPHQAALQHCGPPAASVDGNETAGSAASTASPAAAAARSFTLNPNDFYQLFPFHLLLDRSCRVVQAGAMLERLFPELRGRSGVPLGEVFQLKHPHGPLDFDHLVSDIDNAFLLKARASGLELKGQMVAVPLPLHPGAGCPATQEGLLFMGTARLAGLDDMRHHGIFISDIPHHDINRDYVLLAEQRQAEAQLQERLESLTRELKDANSRLGEMAGW…
>CRv4_Au5.s7.g13855.t1
MCGIALELLHAAQLGDGPSAVAILRPALETGLHARGPDHLGTQQVDAALGHAVLRLTATLLQLRGRHPCVSPSISEQGHVLCFNGEIFGGLDVPPGTNDGARLLRELAAAGDAVPEVLGPIRGPWALLFWDPNRQRLWFGRDVLGRRSLLVHWPDAAEPRLLMSSASELGTASVGLGAANGNTDLGAEAAVAGGADALEAAAVTAGEAHGAQGAAAAAHRWAADDAAALVRPMSLPRSPDIASHVDQLAVGLLNVMLAAIRVRCACIEPRSPHPSAAYGAAVAKAAAAAAAAATVAAEGSSCPPWPSWRASDPQAYNAAAVAVPTGAVASVTPAAGAVAGGAAPLAPQPPPPVMILFSGGVDSVLLAALAHRALPLDFPIDLCNVCFDGGKSPDRGAAR…
>CRv4_Au5.s7.g13857.t1
MIGWINISVESFVREKFGDAVWEQTLSTSGVQAGWVSSCPYPDAATYGLVITASSILGVTPAQALEAYGVYFVEYTARLGYEKLLKSLGSNMAEFLKNLNDLHLHLGMSFPAMAAPAFKCTDVGPTCLTLHYHSHRPALGPIVVGVLKGLAEQYWGLGGDQLQVELLRGRDDGSDDHEVFRVSYPHQAALQHCGPPAASVDGSQAAGSAASTASPAAAAARSFTLNPNDFYQLFPFHLLLDRSCRVVQAGAMLERLLPELRGQSGVPLGDVFQLKHPHRPLDFETVTRELDNIFVLKAHVSGLELKGQMVAVPLPLHPGAGCPATQEGLLFMGTARLAGLDDMRHHGIFISDIPHHDINRDYVLLAEQRQAEAQLQERLEYLTRELKDTNSRLDEERRR…
>CRv4_Au5.s7.g13868.t1
MEAITKGVAKLGAAVGLGTGDDDTRTQRSGGNLGGKVIRTSGGVTVTSNKDPEKRMRAVTWHGPKKIVMEERPRPMITDPTDAVLRVTSSAICGSDLHLYLGSAPGMQRGDVLGHEFMGFVEEVGPEVKHVKKGDRVVACFDIACGHCRSCSRGAFSGCDITNPSKDQEMMYGARTAGMFGYAHVTGGYEGGQTDYVRVPFADVNLLHVPKDLPDNKLLLLSDIMSTAWFANELGSVGPDTTVAIWGAGPGTCQRASVSASQRVQIGWGRFYAGFAAVKEALERLVPGGPDVCIEAVGFHYCKSLVHAVMVKTLMETDTADILNELIYCCRKGGTIACIGVYVGLVNGFNIGALMEKGLTLKAGQTPVQKYWGHLLEMVKSGKLDPTMIITHELPIEDA…
>CRv4_Au5.s7.g13886.t1
MGCGASTQHGGKAPVSPSPAPQPLGSSANSTRAAQTPPDGVTQPAPGEQSLHASNECITTPVEVSNPQALPAPKEEDITASQTPLPATSPPLVAGSDLEPAAVEAALDAGANTSAGIKGETAAPEAAASCTSTEGGAAAPAPAAISDAVVTKAAPEAPGNESAAAAKAAAAAAAASALSDYSGRLQLRHTMCLQGHPTSCSRCPGELPAEGREELFELMQVWHRDWHGFPAWDAVLKTREILSKAQAPQAPAAGGGTTGDKAAAGTEQENRGSDAGGVWASLTNAERRMVCEATALNAAMAYDLKLKDVRKGGRAGLHLRVLSAARSRRQQQQQQQQQQQQQQQQQQQQQQQQQQQQQQQQQQQQQQQQQQQQQQQQQQQPAAASAAGEHATAAVEGSS…
>CRv4_Au5.s7.g13891.t1
MRTLRETCVCNAQRGIFLALLVSVIANAKLLEEQAILESEAPIGSQPLPAFRVLLLALPYAAHSLPLLRLGQELASRGNAVFFGSTDDYVELPYGKQVDFAALGVTWLPLGAPLHNASQRHEREQWAVEHWDSNNPDNAFRNSTGVLMREFHVVFLNGLAKTHKLGPGSFDVVITDFLTSAGHDYAEYIGAPLVVFNSLSYIAFESRMMAVPPALLMPVMPIMLPYKMDFAAAVQNTLMTLLFEAKPCRTFLDIMDECRALGGLVPGSFRQSLTRRPQPLLLIPAAPGFEPPVALPPHVRVVGGMLFESGPMSDKIREYLESDPGTPVIYVGFGSFVDFPDPTYALILRALGRVPARVLWSLKPKSAPSVMAAIANGTAPANVRVEPWVQQLAVLRHPA…
>CRv4_Au5.s7.g13893.t1
MGLARDGVACRSLCSGHKSFVRGGACWSRRPVGVRAQSAPSSEALVAEPAVSEPSTSEPDSALRSTNWPRKSSLYILRTDGKSCSRELVTGTGKLHFAYPSTQQHLLVWRHRPKSVMVIMKLGDELLAPFLDVVDFLGREHQLRVVVEPHVYEQQVAGRLDEFPFVYTYTQADMERLAEYVDFVVCLGGDGVILHSSYLFKASMPPVIAFNMGSMGFLTNHDFSNFKQDLLDVIYGGTKLDSCTLLSLDSVNSMDEPGNSLGVMVTLRMRLSCEVWRKGSRQPEQVVEVLNEMVIDRGSSAFLTNIECYEKGRFISRVQADGIMLATPTGSTAYSVAAGGSMVHPNVPAILLTPVCPHSLSFRPIILPDYAELELRIPDNARCTAWVCFDGRSRQELGR…
>CRv4_Au5.s7.g13919.t1
MGSGRDGRPASYTKKNFSLEKLKLSSMKDDLTVLRHMWFGSKKGDDHAARLESFYGPQAAAYDAFRSRFLWGRRPMLAAVAARLAERSNLIWVDLGGGTGENVDMMADYIDLAKFKSIYVVDLCHSLCEVAKKKAKAKGWKNVQVVEADACQFAPPEGTATLITFSYSLTMIPPFHNVIDQACSYLSQDGLVGVADFYVSGKYDLPLRQMPWSRRFFWRSIFDIDNIDIGPERRAYLEQKLERVWEQNTQGSIPYVPWLRAPYYVWIGRLPSVGHALHEERVERPPMFPPTFLYTQSWEDPEPDMEVMEINPKDTVLTLTSGGCNALNLLVQGAGQVVSVDCNPAQSALLELKKVAIQQLEFEDVWQLFGEGVHPRIEELYEKKLAPFLSQTSHNFWSK…
>CRv4_Au5.s7.g13927.t1
MQKVFTDTYFVEPPLDKDTAQLARGYDVAVLFVNDRADASVIKELAKAGVKLIALRCAGFDRVDLHACAEHGVRVVRVPTYSPESVAEHAVALIFALNRHLTDAYIRVRMGNYSLSGLVGVEMRHKVVGVVGTGAIGQQAARILKGIGCKVFAYDIKPNPAVEAMGIPYVSLDELLAMSDIVTLHCPLLPSTRQLINKESIQKMKKGVMLINVSRGGLIDSAALFDALESGQIGALGLDVYENEGGLFFVDHTKFDPSVRMQKWDRQFRTLLSYPQVLVTPHTAFLTEEALNNICTTTIQNIADYVLDRPLGNEVKAQPAPAGKT
>CRv4_Au5.s7.g13939.t1
MTCAYGVQALGRKHEEQGVQDHPPGTVPLLPGGPVALAEAERLLEAMELAHVQHVRVWRPQSGRLQPGYYVAVDHPGRRVVWGIRGTLAFSDLITDLAMAAHPLPLRGAPDAAAHWGMTHAAHWLLQQEAQHVAALLRSLRGPGGSAPYRLELVGHSLGGSVAALMAAMLREGLVEVGRSEDVPPHLVSCIAFAPPAVMSPCLAAACRPYVTSVVLNHDVVPRFNAHSLALLQQELQGVDWFAELQRTVMEHTMMRNITSTFGALTATTLNIIPPPSLPPPVTSAGAAAAAATSAAQTALSNGAGAAADAVQQLSAAVLRSGAFQSAIATLDEWKARMGAAPGEQAEVADLPMLLPPGRVLYIRPVLPQDSEALAAAAVTRAADGAGRDAANPAVPPGH…
>CRv4_Au5.s7.g13944.t1
MALVSKQISRATQVAGRRMAAVRPAMASRVSRSARLNTVCKVHKICVLPGDGIGPEIMEVATQALSVAGGKEGETFEYKQCLIGGAAIDATGKPLPDETLEVAKQSNAVLLAAIGGYKWDTLPSAQRPERGLLAIRAGLNAFANLRPAIVPRQLADSSPLKRELVEGVDILIVRELVGGIYFGQPRGFGTNEKGERIGYNTDVYSEPEVERIARVAFEAARKRGKRLCSVEKSNVLEVSQLWKEVVIRVGAEYPDVELSHMYIDNAAMQLLRNPKYFDVIVTGNIFGDILSDEASMLAGSLGLLPSASISGSGPGIYEPVHGSAPDIAGKDLANPLAMVLSAAMMCRYDLAIPKVADRLEAAVNAVLDAGLRTADIYKAGTPNTRLVKCSEMGAELMKHL
>CRv4_Au5.s7.g13946.t1
MQTSSLLGRRTAHPAAGATPKPVAPSPRVASTRQVACNVATGPRPPMTTFTGGNKGPAKQQVSLDLRDEGAGMFTSTSPEMRRVVPDDVKGRVKVKVVYVVLEAQYQSAISAAVKNINAKNSKVCFEVVGYLLEELRDQKNLDMLKEDVASANIFIGSLIFIEELAEKIVEAVSPLREKLDACLIFPSMPAVMKLNKLGTFSMAQLGQSKSVFSEFIKSARKNNDNFEEGLLKLVRTLPKVLKYLPSDKAQDAKNFVNSLQYWLGGNSDNLENLLLNTVSNYVPALKGVDFSVAEPTAYPDVGIWHPLASGMYEDLKEYLNWYDTRKDMVFAKDAPVIGLVLQRSHLVTGDEGHYSGVVAELESRGAKVIPVFAGGLDFSAPVKKFFYDPLGSGRTFVD…
>CRv4_Au5.s7.g13986.t1
MKSAQSLLMKLQAPIKGCLQQGTSEGLRSFAARALGSAMETSLIPEANSASTSASSASQLQQTRSMGYAYARKTTDKDYIASEHMQAFGNTQLTDYIIKTVPKFVKMAVTGPAQSSVLYQEPTIYTTPESLVPLMVFLRDHTNTQFKCLLDVTAVDFPERAARFEVVYHLLSPRWNNRIRVKVCVDEVTAVPTLCKVFNTANWFERETWDMFGVFFSGHPDLRRILTDYGFTGHPLRKDFPMTGYQEVRYDYGKKRVVSEPLELTQEFRYFDFNSPWETLNR
>CRv4_Au5.s7.g14002.t1
MLQQTSRTAAPRQGAFGTGPAPRVSRCRLAAQCRSASSGQQQQQTADELAVSRRQALASSLAMVAGAVLLPVAPALAEAEAITAASVSGIGAGALQTLTDPILAYTYQYPIVTTMGKPLNMIVSRTPEKYSSAAPLTADARQRIVSEVFDFKNFVTASMTVGPASGVLKGRNPEEWKPREVALTVLVDRSTARTTAGQRVALNDVQESHLETRDGQQYWVYEHVSQGSPTITSRTKESYRHALAITSWRNGQDGSPYLYTLNLSCPEQLWPELEPVFKEAVSKFALLPTTRDYIPPDKDPWLFF
>CRv4_Au5.s7.g14003.t1
MSAPEGTSGPGSVSSPPLPVYFETQAAASPTVRGGPGSGAEQEPSSSAGPDIDTETCHLGTDAAAAGRGRAAAAPTAAAADAGAPGGEQLTWRQGQQEQQRQKQEAEEAREAAEEEAAAAASHEAAVAALGGLHGAGGEYEVTGPVDAAGTLGSLAGGVLGSVAAGIAGLSLTAASAAVVGAAGVGTALGAALGYGLSPTRHPHRPPRQPHQPPELPPRRGSLGSGGGGGGGASEPLGAGTQRGGPRREEAAAAEARATQPAAGGRTWGWGWGGGGGGGGLDGGDVPLLGDEDLAIEATSPRGSGGGGHGGGGGQMRRLSAPVGLMPAAAAAPPPPGGVLGREQPAEGPHGAAAAAAVAGGAGGAGAGGGVAGMLSSAAAALGHGLGVTHGNTPRWQAL…
>CRv4_Au5.s7.g14008.t1
MHRDLLLNSSHPAHMPLLHQHVAGPGLALRNYSVSTPTCCPSRLSLLTSKFVHNHNITANYLPYGGYERFGQMMMAGAQQQGSQGPQGPRQQGLGLDSSWLPTQLQSAGYNTYLVGKFLNEFTPAGAAGCPRGWTALDALVDPWVYTYFGPVFSRDCDPQLQRYADTDYSTDVIRDKGLAYIREAVSSGRPFFLELAPVGPHEACTQGESGQWCGDPLPAPRHAGLFPGAAIPSTRSWLTPFPDPALTGKLQPPQRASNGSVIGPYLPPSVRRLKQRQRARLQSLQAVDELVRDVVLELAAQGVLENTYVIYMSDNGYHMGQHNANAGKYMPWEEDVRVPFFMRGPGVPSGLVSDYPAAVVDVAATLINLAGLPLPADWDGYPLPMHRLTPPGAPGLDP…
>CRv4_Au5.s7.g14019.t1
MAKQYPSIVQQRTFKLKTAAEMERDAALRGTLKRTLGPFGLTMVGVGFMLGAGIFMAPGTIAVDMTGPAVCISYLIAALSAFLSCFCYAEFACDMPLAGAAYNYIAASLGEFFAWVVTSNLIFEYILADAAVIRGFAPYFATLIGKDPDFFVYTTVTGGKTYVMDWWAFAITLAMTAFVSIGAKESTTANTIITVIHLVVMAFIIIAGFTQADSANFHPFFPNDQPQQWKQVFNGAAIAFFSFIGFDAVATAAEEVKKPSKHMPWGILGSMSIVTVIYFLMCVVLCLMVPRDMINPDATFAAAFVYVGLPWASHIVALGALLGILTGILIGIYAPARILTGCCREGMLPPVLAWIGPKQTPWVATWVIGICIAVIALLTDFAELANMVSIGTFVVFWFV…
>CRv4_Au5.s7.g14042.t1
MSSDAHYQSAASLVQTVQRYLTKTKSQELLIRSTTLISIYLLAFCIRLFSVLRYESVIHEFDPYFNYRSTIKLVTEGFYEFWNWFDAESWHPLGRVVGGTVYPGLMWTAAILYKVSSFLTACIKLRDICVFTAPFFAGNTAMVAYLFGKELKDTETGLVAAALMAIVPGYISRSVAGSFDNEAVAIFALTTCFYLWVCAVNRGTIASGVFAAFAYLYMAASWGAYVFISNLIPLYIIIMFFIGRYSRRLYVAYTTFWAVGGILAMQIRFIGFNHVLSNELLSWNAVFAALQVWELIVFLRAKLGDRKFGQLAYLLALGAVGAGAGAVVILIASGKLNPWTGRFWTLLDPTYAKKFIPIVASVSEHQPTTWASYIFDLHVLVFAAPAGLYFCFKKLTDGT…
>CRv4_Au5.s7.g14045.t1
MALVARPVLSARVAASRPRVAARKAVRVSAKYGENSRYFDLQDMENTTGSWDMYGVDEKKRYPDNQAKFFTQATDIISRRESLRALVALSGIAAIVTYGLKGAKDADLPITKGPQTTGENGKGGSVRSRL
>CRv4_Au5.s7.g14072.t1
MALLHKTQLNAGARRASRPAVARVSTVRVQATVAMPSPTSTFAQPHGRVFNFSAGPAVLPVDVLERAQAELLNWHGSGMSIMEMSHRGKEFESVIQKAEADLRTLLNIPSNYKVLFLQGGASTQFSMIPLNLAKAGETVDYVVTGAWSKKAAEEAAKYCKVNIAAKGDNKSLPAVASWKLSPDSRYVHYCDNETIGGVEFKSVPDVGDRVLVSDMSSNFISKPIDVAKYGIIYAGAQKNVGPAGVTIVIIREDLIGHCRAEAPTMLDYKIHVENDSMYNTPPCWAVYVCGLVFEKLVKLGGLDAMQELNRQKAAILYDAIAESQGFYNSPVDPAVRSLMNVPFTIPSSPDLEKQFIKEAEKAGMLQLKGHRSVGGMRASIYNAMPIEGVQKLALFMKEF…
>CRv4_Au5.s7.g14116.t1
MSRHVVFRAEKEHKAAVECKGKHDWPEDCKPESEALVRATNKLYKEIMEKSPEEFKEYAQCLDWYGLRFSRCRDKQTAFEKAFPIVDAKK
>CRv4_Au5.s7.g14128.t1
MAVAMRSAAMPSLASRPRVSSRRSVVVRAEASNKSFPRDWVKTDPLVPVLGFAGWTIPANIGVSAFGGQSLFGLFTQSIGENLAHFPTGPALDDKFWLYLITYHLGLFLTITLGQIGVQGRKQGYW
>CRv4_Au5.s7.g14133.t1
MSASVCTTRTCRANVFSSRRSVRVMATRTTYKISLTHEGKQVDLAVPEGESILSVALDKGLDLPHDCKLGVCMTCPAKLVSGTVDASGSMLSDDVAEKGYTLLCVAVPKSDCQVKTISEDELLDMQLMTSQ
>CRv4_Au5.s7.g14144.t1
MLGSQSFLGKRQAFRSGKLPGRARCQTVRVSAAVHDISKTEKAPRRVVVTGMGLVSCLGHDHDEFYNNLLAGKSGITNIEGFPCADYTTRFAGEIKSLDCTGYVTKKFEKRVDAVIKYILVAGKKALGDAGLAWDGQEIKDLDRMRCGTLVGTAMGGMTSFANAVEALETSGYRKMNPFCIPFAITNMGGAMLAMDIGFMGPNYSISTACATGNYCIMNSAEHIRRGDADLMLAGAGDAAIIPSGIGGFIACKALSKRNDDPAAASRPWDTDRDGFVMGEGAGVLVLEEYEHAKARGARIYAEYVGGAVTCDAHHMTEPQPEGKGVIMCLQRALASTGLSASDVNYVNAHATSTQAGDMAEYRAINTVFNHSDLRINATKSMIGHLLGGASAVEAVATI…
>CRv4_Au5.s7.g14150.t1
MTDGGNGNGNGNVVGEALGKLSPLFKGIGSPAVDVEVPADQAEPVDEAEVNGRVYHDEHFNHGVHYADEGTAPAPVGRKVTFNAALSKNMDSERMTATTKPVQLGAPMPKWPANHQSAAFEAVSIKHSYILSPPEIFAECAHHGEEKYNYPWYKLWVLTIIAGCYVGFGYTTCLLVGGMLDQAPGVGSPEEENYGLYKLIFGAVGFPFGFTTIIVCGADLFTSLCAYMTAAWWEGKVRWHAVLYMLAVSWTGNFIGCAIMVGLMTAGEVYRHKTTTLFNVTYGKLEYGWGAVFVKGIFANWLVGIATWMANAAQDLTGKAVGIWLPISAFAMLGFEHSIANMFLFLMAWAMGANITAKQFIWDNLIPATLGNFFGGGVCLGTVYAFAYGRTPKLMGAWI…
>CRv4_Au5.s7.g14169.t1
MGSLALLTYVWVVFVLHPARVADAAVTQGGADSGGARIGRLRLNTGGATGHDLSVSGQAASQSSRSLGATGAQASSSGSSSSGASSGSSSGAATGGLGHLNVGYGRGLGAGLQHRGVGSAGGGVGSSASSGAVLTTSNQHLLFQTPSHPTKPQKTAAAKASSPPPPPPDEDDVPEGPHPMRHYPYQDAKYRIWSLPKEDVSPRCRASGICDGKYDCGADGMGCITDALKRKMKVRDAAAWTWKGYRQYAWGHDELNAGSRNSREWFNMGLTIVDSLDTLQILGLLEEYAEARYWVVNHLDLNQGDVSVFETTIRILGGLAAAFYHSGGDEAFLMKAVEFADRLMPAFNTSSGLPQPHFSVHDKNVATYRGSAGSSCLAEIGTLSMEFTAVSRLSGRPEF…
>CRv4_Au5.s7.g14176.t1
MAYRQLQGTNRGASAGAPVAYSRPMQGRVGRSALRVQAVAEAERPTAAKSSGSAEPVTTDITSKLKYLFGRNGDYTNADAYQGTAWSVREKLIDSFNKTHEHWKKEDPKFIYYLSAEFLMGRSLTNTVYNLGLEGEYGNALREMGYHMEKVADAERDAALGNGGLGRLAACFLDSMATLDLPGWGYGIRYKYGMFKQGLKDGYQVEMPDIWLTKGNPWEVRRDDVKFEVGFGGRVERKKVNGKEMTVWTPSEKVIAQAYDNPIPGYATPTTSNLRLWDAVPVHEFDLSAFNAGDYDRAMLERERAEGISAVLYPNDSTPEGKELRLKQQYFFVCASLQDVMSRFRAVHGANWEALPEKACFQLNDTHPTIAVAELMRLLVDVEGLEWDAAWTITTKCLN…
>CRv4_Au5.s7.g14191.t1
MALQVAITGLKSQSGSQLGLSMARLFASAAASPSIKVEVMPYKVHRIEAPSNVVETNVEELTNFYKLMYKMRRMEIAADMMYKAKFIRGFCHLYDGQEAVLTGIEAAITLKDSIITSYRDHCQHVSRGGSIVSLMAELMGKQEGATKGLGGSMHIYNRKNNFYGGNGIVGAQIPLGAGIALAHKYKGEPHVCITMYGDGAANQGQKYEALNMAGLWNLPAIFVCENNHYGMGTAEWRAAKSPNFYTRGDYIPGIKVDGMDVLAVKNAVAFAKAYALANGPIVMEMDTYRYHGHSMSDPGSTYRTRDEINAMRTERDPIERVKRLLLNNGVDPADLKKIDKEVKKEVDDAVEQAKQGQIPPLHWLWRNMYAEPLGAGMRGVLPAEYHVPAFDPTYKS
>CRv4_Au5.s7.g14206.t1
MPARTADAAEQKRAAAEVMDGEGAANAGPDYSIVQRNLALELVRVTEAAALASGRWFGKGDKNAADQAAVDMMRKVLNSVAMDGVVVIGEGEKDEAPMLYCGERIGDGSMFPKVDIAVDPLDGTSLTAAGRNGAISVIAVAERGALFDPGPCMYMEKLAVGPQVDPESVSLDYSVRHNIKWVARALDKPVSDVTVLMLDRPRHADLIRQCREAGARIRLISDGDVAGAIEVAKAGGPVDMMLGIGGTPEGVIAACALKCMGGHIQGRLWPRDDKERAAALERGYDLNKILLMDDLCKGDDVFFAATGVSDGDLLRGVRYHSGGASTNSIVMRCKSGTVRFVETYHKWTKPSVTNISLDEDSDEAGGRSGGGKSGGGKGGKGGGGHGHHYGGAPHGRGAG…
>CRv4_Au5.s7.g14228.t1
MPTTRSRAKAGANGNEPPATPAPASSPEAAATAAAAEAADAAHPLPPALVSAIPRPGGSLDDLCRLQYDADGGPAAARDHVHVHGRRRRAAAPPASSELGGMALLVLLYMVQGVPLGLTTGALPFMLSSKLSYTQMGIFGLAAYPYSLKLLWSPIVDSVYFKSMGRRKSWIVPIQLLTAALLLGCAGWIQQLYEAADVVSLTGLFLVFVFLMATQDIAVDGWALTLLSPANVSYASTCQTVGQTTGIFTSFTVFLALQDAAFCNKYIRAHSWLGSLIGATPADLNLPVGLVSLAGYMRFWGWVFAAVTAAIALFVRERSEEELEAAAAARHDGDARALRAPLSGEERALLGMAGSGSGSAASPAAGSGSGGGSGGGSVMSELADAYLGLWRVVRLPAVW…
>CRv4_Au5.s7.g14232.t1
MASFGLMQRTVHCPQLVEERCSPVAGCSGRGLPVIQRQRRGVCSATNGVQRGRVLRRTAASTDVVSFVDPNDIRKPAAAAAGPAVDKVGVLLLNLGGPEKLDDVKPFLYNLFADPEIIRLPAAAQFLQPLLATIISTLRAPKSAEGYEAIGGGSPLRRITDEQAEALAESLRAKGQPANVYVGMRYWHPYTEEALEHIKADGVTRLVILPLYPQFSISTSGSSLRLLESLFKSDIALKSLRHTVIPSWYQRRGYVSAMADLIVEELKKFRDVPSVELFFSAHGVPKSYVEEAGDPYKEEMEECVRLITDEVKRRGFANTHTLAYQSRVGPAEWLKPYTDESIKELGKRGVKSLLAVPISFVSEHIETLEEIDMEYRELAEESGIRNWGRVPALNTNAAF…
>CRv4_Au5.s7.g14241.t1
MQTTVLRSSTRVGCVRPVGLARALPVRPVVFGSRTPMLLRSAKKDDGYISEDEGLGNVAADYCAIDGAGKKAKRSLGEMEQEFLAAMTSWYYEGKPTMSDEEFSLLKEELIWSGSMVAVLSSDEQRFLEASMAYAKGKPIMTDEDYDALKAELRNKSSIVTAQGPRCSIRSKKMYADAEPDYLRMTALNLPGVLFVLGLVFAVDYSTGFGVTKLVELPAPYGPILLWGLLLPSLFTVAYALTQVGFKDNLILKAPCPSCGSENFSYFGDVFTVAGARGQNLVECPNCKADMIFDEYKRVVVVAETSEVKQEKLAAAAAKKAAAAAKKKAKAAA
>CRv4_Au5.s7.g14253.t1
MQDVISFLLNGLGFAAVGLVVLQLVLSLDLYKRWKLRHLPGPPALPLLGNLPQILAKGSPAFFRECRAKYGPVFRVAFGRNWMVVVAEPDLLRQVGGKLLNHSMFRGLLGGEFAKLDDWGLVSARDDFWRKVRAAWQPAFSAPSLSGYFPLMTDCAVRLADKLEGLARRQPGQQGAGKEEEAAGKAGKAEAEGGSGGGGGSSTRVDIWRELGAMTLQVVGSTAYGVDFQAMESLPAAGTGEGGADTKPAAAPAPASSSYGRVLVQACRDVFKYSSVVYGSKYSRVGLLFPEWRPVVAILANAAPDLPFKMLKTARTHLRDACMSLIDGWKKQEASGVQDGKSKQEEQNGDANGHTAASTAGAKGDGAVSGAGAANAIGEAAAAVGTAAGGVGGLSAGSF…
>CRv4_Au5.s7.g14278.t1
MQTTMQQRLQGRNVAGRSVAPSVPAHRSFHSHRAATQTATISAAASSTTKLPASHLESSKKALDSLKQQAVNRYAGDKKSSIIAIGLTIHNAPVELREKLAVPEAEWPRAIEELCQFPHIEEAAVLSTCNRMELYVVGLSWHRGVREVEEWLSRTSGVPLDELRPYLFLLRDRDATHHLMRVSGGLDSLVMGEGQILAQVRQVYKVGQNCPGFGRHLNGLFKQAITAGKRVRAETSISTGSVSVSSAAVELAQLKLPTHNWSDAKVCIIGAGKMSTLLVKHLQSKGCKEVTVLNRSLPRAQALAEEFPEVKFNIHLMPDLLQCVEASDVIFAASGSEEILIHKEHVEAMSKPSDVVGSKRRFVDISVPRNIAPAINELEHGIVYNVDDLKEVVAANKEG…
>CRv4_Au5.s7.g14281.t1
MGDQVLDLAVQAQVFEICAAPIWIYDSTFSVNVWGNKAALELFGVDEASFKAAQVEQLGSFTPEQLRLWKKLNAQVHQDVEVEKKEINVTVTTGEPVPGFLKLEKARVVLKASYRAIRLREGSSSRERDLTLIQVTAQVAPTVEDNQLRLVEMCNNHPMFQFLFDESGKLLAANKRAMCNMREHLGSCENYNLQNYLAIGECDGSLGPDEMYKEAMEAIFVLEQPCHRFPQLRWSKRHPGKYRWVLYEMWPSIDPVSQQKAVLVCEQNISQVKALEEQIKKQNERLEAQLEEALAQRDPVHKPAIDIDTPADKTLKLLDKIMRGKLTEVTPREAQEVRDAIIQAGDLRQPVNFNEQLMKNSQTVLDSEVSQSLIQLLSSRRPAKIKEEDDEGEDQPKPG…
>CRv4_Au5.s7.g14309.t1
MALRLFGRRAGQLGSSLAQATRAAAVATGELSASCSELFSRQSSVASSSHVREELAAFGVADARFRGLLHMRGLQTSALAMDAFEVQVPSMGESITEGTIANVLKKQGDAVKEDDIIAQIETDKVTIDVKYTGKAPGVISKVLINAADLVKVGQQVAIVETGGAAAAAAPAAAAPAAAAPPPPPPKPVAAEPAKPAAPKAPAPAPAAPTGPSSPTPGPRPERRVKMTRLRMRVAERLKGAQNTYAMLSTFNEVDMSAAIELRSTYKETFLEKHNVKLGFMSVFVKAAAHALQEVPSVNAVIEGDEIIFRDFYDISIAVATPKGLVVPVLRRADELSFADVEKNINALGKKARDGTIGIDDMAGGTFTISNGGVYGSLLSTPIINPPQSAILGMHAIVDR…
>CRv4_Au5.s7.g14327.t1
MAWSLADRAVRRSAAAARRPAAGRRCCARVEAVYATHRATVLVTEKLGDAGLDRLRLTCNVETAYGLTQEELCAKVSLVDALIVRSGTKVTRAVFEASHGRLKVVGRAGVGVDNVDLAAATEAGCLVVNAPTANTVAAAEHGIALLCAMARNIPQADASMKAGSWDRSAYVGTSLAGKTIAVYGFGKVGSEVSRRARGLGLTVVAYDPYASAEKAAAQGVQLVTFDEALQVADFHTLHMPLTPGTKGLFNDSAFARMKRGARIINVARGGVIDEAALLRALESKQVAQAALDVFLEEPPSFENHPLVHRPDVICTPHLGASTTEAQEGVALEVVEAVVDALAGNLSVNAVNAPMVPAEILRELQPYIVLAEGLGRAAVGLVSNSTSSSSSASSSSSSSS…
>CRv4_Au5.s7.g14333.t1
MIAAKSQVALGRRAPVRGQRVVAAASARPTWLPGLNPPAHLKGALAGDNGFDPLGLGQDEGRLKWYAEAEKTNGRWAMMAVAGILGQELLGVTPAWWEAGAKEYDIPAQALTPIEFIVMGFLEIKRYQGFKQTGTSGFINSFPFDPAGMNSPSMATKEVKNGRLAMVAFIGFCVQALATRTQPIEGLTAHLADPFGKNITYYLTHLPETLGSA
>CRv4_Au5.s7.g14340.t1
MSGPDLEQRAQQARAAAEAAGQGHVFEHWGSLGLDYGYLSRVFTSSMAVSSAPSYDGTEPARDVLRLKDWAASGRAAEWTQHGYRLIAEGRAAVLLLAGGQGTRLGSAAPKGCYDIGLPSHKSLFQLQAERLLRTQQLAAAATGTAAVDVKPLRWYIMTSAFTHEETVAHFEQHNYFGLKQEQVIFFQQGFLPCFTEDGKLILEAPGRLAKAPDGNGGVYLALARSGLLEEMAVAGVEALDCYCVDNALARLGDPRFIGYCHGGAGGGAGADVGARVVAKAYPEEKVGVFARRAGAAAASGPASALCVLEYSELDPARAAATDPATGHLYFNWSNICMHYFSVPWLRRVASELLAGGGSAYHVARKRIPSVSGPVPGVKLELFIFDTFPLAGERTALVE…
>CRv4_Au5.s7.g14355.t1
MQTTLKQQRASGRVSARQPFRSAAVARPRRSTVRVQASAAPLNDGLGFETMRDGIKVAAKETLLTPRFYTTDFDEMEQLFSKEINPNLDMEELNACLNEFRNDYNKVHFVRNETFKAAADKVTGETRRIFIEFLERSCTAEFSGFLLYKELARRMKASSPEVAEMFLLMSRDEARHAGFLNKALSDFNLALDLGFLTKNRTYTYFKPKFIIYATFLSEKIGYWRYITIYRHLQRNPDNQFYPLFEYFENWCQDENRHGDFLAACLKAKPELLNTFEAKLWSKFFCLSVYITMYLNDHQRTKFYESLGLNTRQFNQHVIIETNRATERLFPVVPDVEDPRFFEILNKMVDVNAKLVELSASSSPLAGLQKLPLLERMASYCLQLLFFKEKDVGSVDIAGS…
>CRv4_Au5.s7.g14404.t1
MERVCSHQLASSRGRPCIAGVQRSPIRLGTSSVAHVQVSPAGLGRYQRQRLQVVASAAAAAAFDPPGGVSAGFSQPQQQLPQQHPRQPQAVAEVAVAESVSAPASAAPSNDGSPTASMDGGPSSGLSAVPAAATATDLFSAAARLRLPNLSPIITWTFMLSYMAFMLIMPITALLQKASLVPLNVFIARATEPVAMHAYYVTFSCSLIAAAINCVFGFVLAWVLVRYNFAGKKILDAAVDLPFALPTSVAGLTLATVYGDEFFIGQFLQAQGVQVVFTRLGVVIAMIFVSFPFVVRTMQPVMQEIQKEMEEAAWSLGASQWRTFTDVVLPPLLPALLTGTALAFSRALGEFGSIVIVSSNFAFKDLIAPVLIFQCLEQYDYVGATVIGTVLLLISLVMM…
>CRv4_Au5.s7.g14405.t1
MDDEVATSGIHRMFDRVKLRTSLSGNHLRNANAQQQQQQHAAAARATGCRLWMNRLHRRWQSTSSVLRARPMLLVLTFLLFAIMTTLGIVGIEVAARYAEDNARNTARTGVGQEVALGVAQDLLITTFGAEALATFIAQYPNCTIIDMQFLDMAKGIMDRTRKQQPNKWIVKQLEIDQAGVIWRTYPVLTGALAASLYGRDMLRLEKDRPNMLYSIEQGGVHIQGPYGCKEGFQCAYTILPIFLPAPREGYDWGCSYTPYNCSEPCWNATSGMKYWGQVSTMINLDELLKGPDSRLHMLEHRGYLYKLRQLRTSVSNSARTLGNTTRLPETPEVLPINVYNLQWLLELAPVDGWVPAWHDPCIAAVVVGSFLVSLLVLWLLVTRAQHDRLLRAMLPDKV…
>CRv4_Au5.s7.g14417.t1
MFASKHSNGADSLEFGRYTLYPEKDSGVHRHLEGDEWIYVLAGHGTYAYWAHENTEVTELPVHQGSVLFNPQGQLHKLTNTGTEPLYALILSKNLGGTEILAGWPELPTGGVGYVPELMPWETSCAPGHEPDEFYAAATTGEAFEQPAAEGEWTGGEDQHAEL
>CRv4_Au5.s7.g14442.t1
MLASRLLGANAGSWLQCKAAATSGRRGLAPALKAAAVQEVGTVAGASTRPELPKNFELGAEERLYKWWESQGYFKPDPAATGEPFTIPMPPPNVTGKLHMGHAMFATLQDIMTRYARMNGRPALWLPGTDHAGIATQSVVEKMLHKEGASRLGLGREAFTERVWQWKEEYGGFITNQLRRLGASCDWSRERFTLDEGLSAAVAEAFVRLHEKGLIYRGQYMVNWSPGLRTAVSDLEVEYTEEQGTLYYFRYPVAGTDGSEFLPVATTRPETILGDTAVAVHPEDERYKHLIGRECEVPMSGGRRIPIIGDEYVDREFGTGALKITPGHDINDYEIGKRRGLPIINIMNKDATLNAAAGKYAGQERFKARKALWADMEAAGLVIKKEAHTSRIPRCQRSG…
>CRv4_Au5.s7.g14478.t1
MKKLFGQVARKAVALADDIASYNDGRHVPAKARPGGAPKGGDGGAGDGGLDPVLEHLLRNVRSRHVRQHFARTPATEYTRHRNLTIQVATYNVGGKKPHPGIRLDDWLGPGAAGAGAGARVPPQAGPAAAAAAPGGADVVAVGFQELVPLNAGSVMGVLANDNVDAWDRCLAAHLNGEEWAAQRYGTLGPAAPGTAAAAAAAAAMLDAKWQGGPPPRSQLEGGGGGGGAGGGGAEGGSGVEDSTYVQVASKQLVGVYLSVWVRRSLLSAVHGVQVTTVATGFGGYLGNKGAVAARLRLFDSSLVFVAAHLTAGEAEGDELKRNADVADILRRAAFASGLDGGGAVPMTASAAAAVSASLGPGHWPAWPCGITDHDLAIWVGDLNYRLAVAPAAAAAAAQ…
>CRv4_Au5.s7.g14479.t1
MLRVGANHSGQGCGARNTRAAHRTRVAVVVLADSRPAVLITGASTGIGKTAALHLAKKNWQVFAGVRKEIDGAALVAESNGNIEPVILDVVDNTSVQAAVALVQDRLAPSGRNLSGLVNNAGKGVFMPLELIDIDVFDDVMQVNVSGVVRTTKAALPLLRKSRPDQAPGRIVNIGSYAGSISLPLFGAYSASKFALEALSDTMRYELGPKWGIQISLIKASGVKTPIWDKSIGSSNSYLDQVEPSRLAPYKGMCEEIMEIARRGEETGITSEEVAATIEEALTAPRPRSRYLIGNGAELQMTARRLLPDWIWDKLLLNNLRKVVEPL
>CRv4_Au5.s7.g14502.t1
MQRLEVLARQLTAGAAVEDRTPLLATKNDYDTMYKRSIQDPEGFWGEMALGYHWDRKFPARGHMAANTDIRRGPVSIQFFAGGTTNMSYNCLDRWVAAGRGEQAALIWEGNDENERRTVSYRELLAEVNRLSNWLKSRGVKKGDAVTIYLPMVPELPAAMLACARVGAVHSVVFAGFSADSLAQRMVDCNAKVLLTATGVMRGTKPVLLKTIADDAVKLAAKAGQETSSVLCLEVANALAAADTPWNPVRDVWWHAAVPMQSAECEPTWLDSEDRSFLLYTSGSTGKPKGVVHCVGGYMVGVGVSCRYLYDMRPGDVVFTTADCGWITGHSYLAYGPLLCGCSSVIMGGIPTHPDGGRAWRMVERYKVRQFYTAPTLLRSLLQLGDAWPRQSDLSSLRV…
>CRv4_Au5.s7.g14516.t1
MAPKKVLLNGCGRIGRLAFRVAWAQQDVFQFVHLNDITAIESVAYLIKYDSVHGTWGPDVSVDGNCIVVKEGDRVDRIPYTNCKSIEGIKLADGVAVDQAWECTGVFLTRAAIAPHFDALGANKVVVSAPVKDTPAVLNVVVGCNDDKYDPAVDHIVTAASCTTNCLAPVVKVIHEKLGIDRGCITTIHNLTNTQTIVDAPNSKKADLRRARSGLVNLAPTSTGSATAIALIFPELKGKLNGLAVRVPLTNASITDCVFDVKRKTTEEEVNKLLKEASQTYLSGILGFDEVPKVSTDYVNDARSSIVDAACTQVIDGTMVKIYAWYDNEYGYSCRMVDLAKIVAAKM
>CRv4_Au5.s7.g14520.t1
MVAAGFALLLVSLIIYLLDPIKRWRLRKIPGPRGRPVLGCLPQLRAQPMPLFLQSCAQTYGPVALGRKWVVVLADAEMQRQVGFKLRAHARTDPDFSRGRYHAMLSSMLLRASGSTWRQLRAAWQPAFAPASLAGYLPLMTGCADQLARRLEAKATAAAGATASGATAGGGSSVDMWRELGGMTLQVVGSTAYGVDFHSINEEDQAGSGSGSATATAGATAAAKGRGDDGYGKQLAAACGQIFRYGSPVHGSPYLRLAMLFPELRSLLLTLAHTLPDEKFTILTKLIDSWKEQHRAEAEIDAAASSGKPDVGAGRHSSNGVGAAATSGRGGLSGVAPGSFLDLMLGQRQGGERGSGGKKAEGEEGVEHAPLTDEQVAGQVQLFILAGYETTANALAFAV…
>CRv4_Au5.s7.g14521.t1
MLSSMLLRASGSTWRQLRAAWQPAFAPASLAGYLPLMTGCADQLARRLEAKATAAAGATAGGGSSVDMWRELGGMTLQVVGSTAYGVDFHSINEEDQAGSGSGSATATAGATAAAKGRGDDGYGKQLAAACGQIFRYGSPVHGSPYLRVAMLFPELRSLLLTLAHTLPDEKFTILTKARTRLCNTVFQLIDSWKQQHSAEGATAAGASSGKPDAGAGQSNNGVGAAATGGRGLSGVAPGSFLDLMLGHRQGGGSGSGGKKAEGEEGVEHAPLTDEQVAGQVQLFILAGYETTANALAFAVYCIATHPEVESRLLREVDDVLPGSDQLPGESDLPRLAYTEAVVNEALRLFPPAHLTSRVVPPGETLTVGGYTIPGGTAVYLPMYLAHRDPAVWPRAEEF…
>CRv4_Au5.s7.g14533.t1
MHAQDEVSGAVQSQDTTQLRLAALFIILIAGLCGALPPLFMKAFRNHDGLASQLSRSLAAGVILALALVHIIPEAIEDMSGLGGMTYPLGGLCVLGGVALMLLLEHLSQILHNSQAAVAAAAGTGGCGHSHGSSSRGRDSGLVNDHRRRAGTASARRSSGTSSTADGCSSHSVPLLAGMEGEAGDEEGHHYHHQQQQHNQHNHHEHCHAHDVEAPLTPEVPRAGASAGPCDALGAISPTHHGHHPHEHAHDKQHTQQDVVVVVADQQQQGQQQQQQERQGEASSEAGAWLRPVHSHLASMPVDIDLDAEASSGSDNDGGPGAAAVAAAANGHSHGHSHSQHQPPGGCNGSSSGGAKSHDRETTHRHDNDNDHDHGHSHSHLAGDPKHQGHGAHAHAKHT…
>CRv4_Au5.s7.g14534.t1
MSLLRAGRVVLDALVFRDQEGMLTRLVRSFSAGVILALALVHIIPEAVEEMAGLGGIEYPLGGTCVLFGVALMVFLEHLAHIMHGPHSHAPAADSAAAAFTALPSSCTDIEAGATPCGAAKRATAQTSSNCEADPSGVLASDSSVPMKSAMAVAVAEGVASGCCDGAAAGSEGTPAGGAPGDSCYTRASEPGHNHVCVSRGSAGNWFSSTSPAATQAASGSLRLKILAYMFELGCVFHSFIIGISLGVNTTDLVEVRALLIALSFHQFLEGVSLASVVLRGGFSTLKGAIMILTYSLTCPVGIAVGMAIASSYDAESERARGVQGTLNGVSGGMLMYISLVQLVAEDMGRFVPGSPSGGASARLLSFLALFLGAGSMCILAVWS
>CRv4_Au5.s7.g14543.t1
MVEKMHTKVCIIGSGPAAHTAAVYTARAELQPILFEGFMANGIAAGGQLTTTTDVENFPGFPEGILGAELTTRFREQSERFGTRIYSETVDSIDTSRRPFTVRTADKEVTADSLIIATGAVARRLEFPGSGEEGGFWNRGISACAVCDGAAPIFRNKPIAVIGGGDSAMEEATFLTKYGSKVYIIHRRDSFRASKIMAKRALEHPKIEVLWNSVVEEAYGNEKGLLGGVKVKDVVTGELHDLPVSGLFFAIGHQPATAFLNGQLALDAEGYIVTAPDSTATSVPGVFAAGDVQDKKWRQAITAAGTGCMAALEAEHFISAHEAEPEADGAKEPAAAAAAPVADGNL
>CRv4_Au5.s7.g14544.t1
[truncated: 173 more rows]

## Sheet: Table S2
Table S2 List of interrogated genomes
Alveolata	Choanoflagellida	Diplomonadida	Euglenozoa	Amoebazoa	Fungi	Haptophyceae	Heterolobosea	Metazoa	Parabasalidea	Rhodophyta	Stramenopiles	Viridiplantae
Cryptosporidium hominis	Monosiga brevicollis	Giardia lamblia	Leishmania braziliensis MHOMBR75M2904	Entamoeba histolytica	Alternaria brassicicola	Emiliania huxleyi CCMP1516	Naegleria gruberi	Acyrthosiphon pisum	Trichomonas vaginalis	Cyanidioschyzon merolae	Aureococcus anophagefferens	Aquilegia coerulea 6.0
Cryptosporidium muris			Leishmania infantum JPCM5	Dictyostelium discoideum	Ashbya gossypii ATCC 10895			Aedes aegypti			Phaeodactylum tricornutum	Arabidopsis lyrata
Cryptosporidium parvum Iowa II			Leishmania major strain Friedlin	Dictyostelium purpureum	Aspergillus clavatus NRRL 1			Anopheles gambiae			Phytophthora capsici	Arabidopsis thaliana 10
Neospora caninum			Trypanosoma brucei		Aspergillus flavus NRRL3357			Apis mellifera			Phytophthora infestans T30-4	Brachypodium distachyon
Paramecium tetraurelia			Trypanosoma cruzi strain CL Brener		Aspergillus fumigatus A1163			Bombyx mori			Phytophthora ramorum	Carica papaya
Plasmodium berghei ANKA					Aspergillus fumigatus Af293			Bos taurus			Phytophthora sojae	Chlamydomonas reinhardtii 4.0
Plasmodium chabaudi					Aspergillus nidulans FGSC A4			Branchiostoma floridae			Thalassiosira pseudonana	Chlorella vulgaris
Plasmodium falciparum 3D7					Aspergillus niger ATCC 1015			Brugia malayi				Citrus clementina 6.0
Plasmodium knowlesi strain H					Aspergillus oryzae RIB40			Caenorhabditis brenneri				Citrus sinensis 6.0
Plasmodium vivax SaI-1					Aspergillus terreus NIH2624			Caenorhabditis briggsae				Coccomyxa sp. C-169
Plasmodium yoelii ssp. yoelii					Batrachochytrium dendrobatidis JAM81			Caenorhabditis elegans (Ensembl)				Cucumis sativus
Tetrahymena thermophila SB210					Batrachochytrium dendrobatidis JEL423			Caenorhabditis elegans (WormBase)				Eucalyptus grandis 6.0
Theileria annulata					Botrytis cinerea B05.10			Caenorhabditis japonica				Fragaria vesca
Theileria parva					Candida albicans SC5314			Caenorhabditis remanei				Glycine max
Toxoplasma gondii GT1					Candida albicans WO-1			Canis familiaris				Malus x domestica
Toxoplasma gondii ME49					Candida glabrata CBS138			Capitella sp. I				Manihot esculetus
Toxoplasma gondii RH					Candida guilliermondii ATCC 6260			Cavia porcellus				Medicago truncatula
Toxoplasma gondii VEG					Candida lusitaniae ATCC 42720			Ciona intestinalis				Micromonas pusilla CCMP1545
					Candida parapsilosis			Ciona savignyi
					Candida tropicalis MYA-3404			Culex pipiens quinquefasciatus
					Chaetomium globosum CBS 148.51			Danio rerio
					Coccidioides immitis H538.4			Daphnia pulex
					Coccidioides immitis RMSCC 2394			Dasypus novemcinctus
					Coccidioides immitis RMSCC 3703			Dipodomys ordii
					Coccidioides immitis RS			Drosophila ananassae
					Coccidioides posadasii RMSCC 3488			Drosophila erecta
					Coccidioides posadasii str. Silveira			Drosophila grimshawi
					Cochliobolus heterostrophus			Drosophila melanogaster (Ensembl)
					Coprinopsis cinerea okayama7 130			Drosophila melanogaster (FlyBase)
					Cryphonectria parasitica			Drosophila mojavensis
					Cryptococcus neoformans B-3501A			Drosophila persimilis
					Cryptococcus neoformans JEC21			Drosophila pseudoobscura
					Cryptococcus neoformans var. grubii H99			Drosophila sechellia
					Debaromyces hansenii			Drosophila simulans
					Encephalitozoon cuniculi			Drosophila virilis
					Fusarium graminearum			Drosophila willistoni
					Fusarium oxysporum f. sp. lycopersici 4286			Drosophila yakuba
					Fusarium verticillioides 7600			Echinops telfairi
					Histoplasma capsulatum class NAmI strain WU24			Equus caballus
					Histoplasma capsulatum G186AR			Erinaceus europaeus
					Histoplasma capsulatum H143			Felis catus
					Histoplasma capsulatum H88			Gallus gallus
					Kluyveromyces lactis			Gasterosteus aculeatus
					Kluyveromyces thermotolerans CBS 6340			Gorilla gorilla
					Kluyveromyces waltii			Helobdella robusta
					Laccaria bicolor S238N-H82			Homo sapiens
					Lachancea kluyveri			Lottia gigantea
					Lodderomyces elongisporus NRRL YB-4239			Loxodonta africana
					Magnaporthe grisea 70-15			Macaca mulatta
					Malassezia globosa CBS 7966			Meloidogyne hapla
					Melampsora laricis-populina			Microcebus murinus
					Microsporum gypseum			Monodelphis domestica
					Moniliophthora perniciosa FA553			Mus musculus
					Mucor circinelloides			Myotis lucifugus
					Mycosphaerella fijiensis CIRAD86			Nasonia vitripennis
					Mycosphaerella graminicola IPO323			Nematostella vectensis
					Nectria haematococca mpVI			Ochotona princeps
					Neosartorya fischeri NRRL 181			Ornithorhynchus anatinus
					Neurospora crassa OR74A			Oryctolagus cuniculus
					Neurospora discreta FGSC 8579			Oryzias latipes
					Neurospora tetrasperma			Otolemur garnettii
					Paracoccidioides brasiliensis Pb01			Pan troglodytes
					Paracoccidioides brasiliensis Pb03			Pongo pygmaeus
					Paracoccidioides brasiliensis Pb18			Pristionchus pacificus
					Phanerochaete chrysosporium RP-78			Procavia capensis
					Phycomyces blakesleeanus			Pteropus vampyrus
					Pichia stipitis CBS 6054			Rattus norvegicus
					Podospora anserina			Sorex araneus
					Postia placenta			Spermophilus tridecemlineatus
					Puccinia graminis f. sp. tritici CRL 75-36-700-3			Strongylocentrotus purpuratus
					Pyrenophora tritici-repentis			Taeniopygia guttata
					Rhizopus oryzae RA 99-880			Takifugu rubripes
					Saccharomyces bayanus			Tarsius syrichta
					Saccharomyces cerevisiae (Ensembl)			Tetraodon nigroviridis
					Saccharomyces cerevisiae RM11-1a			Tribolium castaneum
					Saccharomyces cerevisiae SGD			Trichoplax adhaerens
					Saccharomyces cerevisiae YJM789			Tupaia belangeri
					Saccharomyces mikatae			Tursiops truncatus
					Saccharomyces paradoxus			Vicugna pacos
					Schizophyllum commune			Xenopus laevis
					Schizosaccharomyces japonicus yFS275			Xenopus tropicalis
					Schizosaccharomyces octosporus yFS286
					Schizosaccharomyces pombe
					Schizosaccharomyces pombe 972h-
					Sclerotinia sclerotiorum
					Sporobolomyces roseus IAM 13481
					Stagonospora nodorum
					Trichoderma atroviride
					Trichoderma reesei
					Trichoderma virens Gv29-8
					Uncinocarpus reesii 1704
					Ustilago maydis
					Vanderwaltozyma polyspora DSM 70294
					Verticillium albo-atrum VaMs.102
					Verticillium dahliae VdLs.17
					Yarrowia lipolytica CLIB122
					Zygosaccharomyces rouxii

## Sheet: Table S3
Table S3 Phylogenetic affinity assignment of transformed network
Gene/Lineage	Alveolata	Amoebazoa	Choanoflagellida	Diplomonadida	Euglenozoa	Fungi	Haptophyceae	Heterolobosea	Metazoa	Parabasalidea	Rhodophyta	Stramenophiles	Viridiplantae
CRv4_Au5.s1.g1022.t1	0	0	0	0	0	0	0	0	0	0	0	0	1
CRv4_Au5.s1.g1092.t1	0	0	0	0	0	0	0	0	0	0	0	0	1
CRv4_Au5.s1.g1126.t1	0	0	0	0	0	0	0	0	0	0	0	0	0
CRv4_Au5.s1.g1213.t1	1	1	0	0	0	1	1	1	0	0	0	1	1
CRv4_Au5.s1.g1306.t1	0	0	0	0	0	0	0	0	0	0	0	0	1
CRv4_Au5.s1.g1345.t1	0	0	0	0	0	0	0	0	0	0	0	0	1
CRv4_Au5.s1.g1377.t1	0	1	1	0	0	1	1	0	1	0	0	1	1
CRv4_Au5.s1.g1522.t1	0	0	0	0	0	1	0	1	1	0	0	1	1
CRv4_Au5.s1.g1611.t1	1	1	1	0	1	1	1	0	1	1	1	1	1
CRv4_Au5.s1.g1717.t1	0	0	0	0	0	0	0	0	0	0	0	0	0
CRv4_Au5.s1.g1718.t1	0	0	0	0	0	0	0	0	0	0	0	0	1
CRv4_Au5.s1.g1722.t1	0	0	0	0	0	0	0	0	0	0	0	0	1
CRv4_Au5.s1.g1788.t1	0	1	0	0	1	1	0	0	1	0	1	1	1
CRv4_Au5.s1.g1960.t1	0	0	0	0	0	0	0	0	0	0	0	0	1
CRv4_Au5.s1.g2299.t1	0	0	0	0	0	0	0	0	0	0	0	0	0
CRv4_Au5.s1.g2332.t1	1	1	1	0	0	1	1	1	1	0	1	1	1
CRv4_Au5.s1.g2332.t2	1	1	1	0	0	1	1	1	1	0	1	1	1
CRv4_Au5.s1.g2380.t1	1	1	1	1	1	1	1	1	1	0	1	1	1
CRv4_Au5.s1.g2400.t1	0	0	0	0	0	0	0	0	0	0	0	0	1
CRv4_Au5.s1.g2412.t1	0	0	0	0	0	0	0	0	0	0	0	0	0
CRv4_Au5.s1.g2413.t1	0	0	0	0	0	0	0	0	0	0	0	0	0
CRv4_Au5.s10.g143.t1	1	1	1	1	1	1	1	1	1	1	1	1	1
CRv4_Au5.s10.g170.t1	0	0	0	0	0	0	1	0	0	0	1	1	1
CRv4_Au5.s10.g312.t1	0	0	0	0	0	1	1	0	0	0	0	1	1
CRv4_Au5.s10.g313.t1	0	0	0	0	0	1	1	0	0	0	0	1	1
CRv4_Au5.s10.g33.t1	0	0	0	0	0	0	0	0	0	0	0	0	1
CRv4_Au5.s10.g494.t1	0	0	0	0	0	1	1	0	0	0	0	1	1
CRv4_Au5.s10.g498.t1	0	0	0	0	0	1	1	0	0	0	0	1	1
CRv4_Au5.s10.g498.t2	0	0	0	0	0	1	1	0	0	0	0	1	1
CRv4_Au5.s10.g542.t1	0	0	0	0	0	0	0	0	0	0	0	0	1
CRv4_Au5.s10.g542.t2	0	0	0	0	0	0	0	0	0	0	0	0	1
CRv4_Au5.s10.g563.t1	1	1	1	1	1	1	1	1	1	1	1	1	1
CRv4_Au5.s10.g65.t1	0	1	0	0	0	0	1	0	0	0	1	1	1
CRv4_Au5.s10.g682.t1	0	0	0	0	0	0	1	0	0	0	1	1	1
CRv4_Au5.s10.g712.t1	0	0	1	0	0	0	0	0	0	0	0	1	1
CRv4_Au5.s10.g767.t1	0	0	0	0	0	1	0	1	1	0	0	1	1
CRv4_Au5.s11.g2419.t1	1	1	1	0	0	1	0	1	1	0	1	1	1
CRv4_Au5.s11.g2503.t1	0	0	0	0	0	1	0	0	0	0	0	0	1
CRv4_Au5.s12.g2838.t1	1	0	0	0	0	0	1	0	0	0	1	1	1
CRv4_Au5.s12.g2868.t1	0	0	0	0	0	0	0	0	0	0	0	0	0
CRv4_Au5.s12.g2906.t1	0	0	0	0	0	0	0	0	0	0	0	0	1
CRv4_Au5.s12.g2944.t1	0	0	0	0	0	0	0	0	0	0	0	0	0
CRv4_Au5.s12.g3125.t1	0	0	0	0	0	0	0	0	0	0	0	0	1
CRv4_Au5.s12.g3133.t1	1	0	1	0	0	0	0	0	1	0	0	1	1
CRv4_Au5.s12.g3146.t1	0	0	1	0	1	0	0	0	1	0	0	1	1
CRv4_Au5.s12.g3233.t1	0	0	0	0	0	0	0	0	0	0	0	0	1
CRv4_Au5.s12.g3249.t1	0	0	0	0	0	0	1	0	0	0	1	1	1
CRv4_Au5.s12.g3255.t1	0	0	0	0	0	0	0	0	0	0	0	0	1
CRv4_Au5.s12.g3518.t1	1	1	1	0	1	1	1	1	1	0	1	1	1
CRv4_Au5.s12.g3532.t1	1	1	0	0	0	1	0	1	1	0	0	1	1
CRv4_Au5.s12.g3671.t1	0	0	0	0	0	0	0	0	0	0	0	0	1
CRv4_Au5.s12.g3675.t1	0	0	0	0	0	0	0	0	0	0	0	0	1
CRv4_Au5.s12.g3784.t1	0	0	0	0	0	0	0	0	0	0	0	0	0
CRv4_Au5.s12.g3889.t1	1	1	0	0	0	1	1	1	0	0	0	1	1
CRv4_Au5.s12.g3986.t1	0	0	0	0	0	0	0	0	0	0	0	0	1
CRv4_Au5.s12.g4032.t1	0	0	0	0	0	0	1	0	0	0	1	1	1
CRv4_Au5.s12.g4049.t1	1	1	1	0	1	1	1	1	1	0	0	1	1
CRv4_Au5.s12.g4161.t1	1	1	1	1	1	1	1	1	1	1	1	1	1
CRv4_Au5.s12.g4221.t1	0	1	0	0	0	1	0	1	1	0	1	0	1
CRv4_Au5.s12.g4222.t1	1	1	0	0	0	1	1	0	1	0	0	1	1
CRv4_Au5.s12.g4241.t1	0	0	0	0	0	0	0	0	0	0	0	0	1
CRv4_Au5.s12.g4262.t1	1	1	1	1	1	1	1	1	1	1	0	1	1
CRv4_Au5.s13.g4356.t1	0	0	0	0	0	0	0	0	0	0	0	0	0
CRv4_Au5.s13.g4507.t1	0	0	0	0	0	0	0	0	0	0	0	0	0
CRv4_Au5.s13.g4555.t1	1	0	0	0	0	1	0	1	1	0	1	0	1
CRv4_Au5.s13.g4561.t1	1	1	1	1	1	1	1	1	1	1	1	1	1
CRv4_Au5.s13.g4608.t1	1	1	1	0	1	1	1	1	1	0	1	1	1
CRv4_Au5.s13.g4777.t1	1	0	1	1	0	1	1	1	1	1	1	1	1
CRv4_Au5.s13.g4791.t1	1	1	1	1	1	1	1	1	1	1	1	1	1
CRv4_Au5.s13.g4859.t1	0	0	0	0	0	0	0	0	0	0	0	0	0
CRv4_Au5.s13.g5038.t1	0	0	0	0	0	0	1	0	0	0	1	1	1
CRv4_Au5.s14.g5284.t1	0	0	0	0	0	0	0	0	0	0	0	0	0
CRv4_Au5.s14.g5285.t1	0	0	0	0	0	0	0	0	0	0	0	0	0
CRv4_Au5.s14.g5343.t1	1	1	0	0	0	1	0	1	1	0	1	1	1
CRv4_Au5.s14.g5379.t1	1	0	0	0	0	0	1	0	0	0	1	1	1
CRv4_Au5.s14.g5398.t1	0	0	0	0	0	0	0	0	0	0	1	0	1
CRv4_Au5.s14.g5402.t1	0	0	0	0	0	0	0	0	0	0	0	0	0
CRv4_Au5.s14.g5492.t1	1	1	1	1	1	1	1	1	1	1	1	1	1
CRv4_Au5.s14.g5515.t1	1	1	1	0	1	1	1	1	1	1	1	1	1
CRv4_Au5.s15.g5776.t1	1	1	1	0	0	1	1	0	1	0	1	1	1
CRv4_Au5.s15.g5813.t1	0	0	0	0	0	0	0	0	0	0	0	0	0
CRv4_Au5.s15.g5828.t1	1	1	1	0	1	1	1	1	1	0	1	1	1
CRv4_Au5.s15.g5921.t1	0	0	0	0	0	0	0	0	0	0	0	0	0
CRv4_Au5.s15.g5929.t1	1	1	1	0	0	1	1	0	1	0	1	1	1
CRv4_Au5.s16.g6063.t1	0	0	0	0	0	0	0	0	0	0	0	0	1
CRv4_Au5.s16.g6082.t1	0	0	0	0	0	0	1	0	0	0	1	1	1
CRv4_Au5.s16.g6192.t1	1	1	1	0	1	1	1	1	1	1	1	1	1
CRv4_Au5.s16.g6221.t1	0	0	0	0	0	0	0	0	0	0	0	0	0
CRv4_Au5.s16.g6244.t1	0	0	0	0	0	0	0	0	0	0	0	0	0
CRv4_Au5.s16.g6245.t1	1	1	1	1	1	1	1	1	1	1	1	1	1
CRv4_Au5.s16.g6246.t1	1	1	1	1	1	1	1	1	1	1	1	1	1
CRv4_Au5.s16.g6247.t1	1	1	1	1	1	1	1	1	1	1	1	1	1
CRv4_Au5.s16.g6362.t1	0	0	0	0	0	0	0	0	0	0	0	0	1
CRv4_Au5.s16.g6435.t1	0	0	0	0	0	0	0	0	0	0	0	0	0
CRv4_Au5.s16.g6436.t1	0	1	0	1	1	1	1	1	1	1	0	1	1
CRv4_Au5.s16.g6452.t1	1	0	1	0	0	1	1	1	1	1	1	1	1
CRv4_Au5.s16.g6473.t1	0	0	0	0	0	0	1	0	0	0	1	1	1
CRv4_Au5.s16.g6479.t1	0	0	0	0	0	0	0	0	0	0	0	0	0
CRv4_Au5.s16.g6506.t1	1	1	1	0	1	1	1	1	1	1	1	1	1
CRv4_Au5.s16.g6512.t1	0	0	0	0	0	0	0	0	0	0	0	0	0
CRv4_Au5.s16.g6524.t1	0	0	0	0	0	0	1	0	0	0	1	1	1
CRv4_Au5.s16.g6629.t1	0	0	0	0	0	0	0	0	0	0	0	0	1
CRv4_Au5.s16.g6652.t1	1	0	1	0	0	1	1	0	1	0	1	1	1
CRv4_Au5.s16.g6744.t1	1	1	0	0	1	1	1	1	1	0	1	1	1
CRv4_Au5.s16.g6787.t1	1	1	0	0	0	1	1	0	0	0	1	1	1
CRv4_Au5.s16.g6789.t1	1	1	0	0	0	1	1	0	0	0	1	1	1
CRv4_Au5.s16.g6811.t1	0	0	0	0	0	0	1	0	0	0	1	1	1
CRv4_Au5.s16.g6812.t1	1	1	1	0	1	1	1	1	1	0	0	1	1
CRv4_Au5.s16.g6846.t1	1	1	1	0	1	1	1	1	1	1	1	1	1
CRv4_Au5.s17.g7006.t1	0	0	0	0	0	0	0	0	0	0	0	0	0
CRv4_Au5.s17.g7115.t1	0	0	0	0	0	1	1	0	0	0	0	1	1
CRv4_Au5.s17.g7269.t1	1	1	1	0	1	1	1	1	1	0	0	1	1
CRv4_Au5.s17.g7309.t1	0	0	0	0	0	1	0	0	0	0	0	0	1
CRv4_Au5.s17.g7310.t1	0	0	0	0	0	0	0	0	0	0	0	0	1
CRv4_Au5.s17.g7311.t1	0	0	0	0	0	1	0	0	0	0	0	0	1
CRv4_Au5.s17.g7318.t1	0	0	0	0	0	0	0	0	0	0	0	0	0
CRv4_Au5.s17.g7448.t1	0	0	0	0	0	0	1	0	0	0	1	1	1
CRv4_Au5.s17.g7510.t1	0	1	1	0	0	1	0	0	1	0	0	1	1
CRv4_Au5.s17.g7569.t1	1	1	0	0	1	1	1	0	1	0	1	1	1
CRv4_Au5.s17.g7577.t1	0	0	0	0	0	0	0	0	0	0	0	0	0
CRv4_Au5.s17.g7623.t1	0	0	0	0	0	0	0	0	0	0	0	0	0
CRv4_Au5.s17.g7679.t1	0	0	0	0	0	0	0	0	0	0	0	0	1
CRv4_Au5.s18.g7924.t1	1	1	0	0	1	1	0	0	1	0	1	1	1
CRv4_Au5.s18.g7938.t1	0	0	0	0	0	0	0	0	0	0	0	0	0
CRv4_Au5.s18.g7949.t1	0	0	0	0	0	0	0	0	0	0	0	0	0
CRv4_Au5.s18.g8045.t1	0	0	0	0	0	0	1	0	0	0	1	1	1
CRv4_Au5.s18.g8048.t1	1	0	1	0	0	1	1	0	1	0	1	1	1
CRv4_Au5.s19.g8092.t1	1	1	1	0	1	1	1	1	1	1	1	1	1
CRv4_Au5.s2.g8288.t1	0	0	0	0	0	0	0	0	0	0	0	0	1
CRv4_Au5.s2.g8307.t1	1	1	0	0	0	1	1	0	0	0	1	1	1
CRv4_Au5.s2.g8449.t1	0	0	0	0	0	0	0	0	0	0	0	0	0
CRv4_Au5.s2.g8457.t1	1	1	1	0	1	1	1	1	1	0	0	1	1
CRv4_Au5.s2.g8458.t1	0	0	0	0	0	0	0	0	0	0	0	0	1
CRv4_Au5.s2.g8507.t1	0	0	0	0	0	0	0	0	0	0	0	0	1
CRv4_Au5.s2.g8766.t1	0	0	0	0	0	0	0	0	0	0	0	0	0
CRv4_Au5.s2.g8924.t1	1	1	1	0	1	1	1	1	1	1	1	1	1
CRv4_Au5.s2.g8991.t1	0	0	1	0	0	1	1	0	0	0	0	1	1
CRv4_Au5.s2.g9015.t2	0	0	0	0	0	0	0	0	0	0	0	0	0
CRv4_Au5.s2.g9021.t1	1	1	1	0	1	1	1	1	1	0	1	1	1
CRv4_Au5.s2.g9042.t1	0	0	0	0	0	0	1	0	0	0	0	0	1
CRv4_Au5.s2.g9059.t1	0	1	0	0	0	1	0	0	1	0	1	1	1
CRv4_Au5.s2.g9234.t1	1	1	0	1	1	1	1	1	1	1	1	1	1
CRv4_Au5.s2.g9288.t1	0	0	0	0	0	1	0	0	0	0	0	0	1
CRv4_Au5.s2.g9294.t1	0	0	0	0	0	0	0	0	0	0	0	0	1
CRv4_Au5.s2.g9429.t1	0	0	0	0	0	0	0	0	0	0	1	1	1
CRv4_Au5.s2.g9642.t1	1	1	0	0	0	1	0	1	1	0	0	1	1
CRv4_Au5.s2.g9693.t1	1	0	1	0	1	1	1	1	1	0	1	1	1
CRv4_Au5.s2.g9694.t1	1	0	1	0	1	1	1	1	1	0	1	1	1
CRv4_Au5.s2.g9695.t1	1	0	1	0	1	1	1	1	1	0	1	1	1
CRv4_Au5.s20.g8200.t1	1	1	1	0	1	1	1	1	1	1	1	1	1
CRv4_Au5.s22.g9816.t1	0	0	0	0	0	0	1	0	0	0	0	1	1
CRv4_Au5.s23.g9860.t1	1	1	1	1	1	1	1	1	1	1	1	1	1
CRv4_Au5.s23.g9861.t1	0	0	0	0	0	0	0	0	0	0	0	0	0
CRv4_Au5.s23.g9903.t1	0	0	0	0	0	0	0	0	0	0	0	0	0
CRv4_Au5.s26.g9996.t1	1	0	1	0	1	1	1	1	1	0	1	1	1
CRv4_Au5.s26.g9997.t1	1	0	1	0	1	1	1	1	1	0	1	1	1
CRv4_Au5.s27.g10043.t1	1	1	1	0	1	1	0	1	1	0	1	1	1
CRv4_Au5.s3.g10234.t1	0	0	0	0	0	0	0	0	0	0	0	0	0
CRv4_Au5.s3.g10341.t1	1	1	1	0	1	1	1	1	1	0	1	1	1
CRv4_Au5.s3.g10363.t1	0	0	1	0	0	0	0	0	0	0	1	1	1
CRv4_Au5.s3.g10394.t1	1	1	1	0	1	1	1	1	1	1	1	1	1
CRv4_Au5.s3.g10407.t1	0	0	0	0	0	0	0	0	0	0	0	0	0
CRv4_Au5.s3.g10432.t1	0	0	0	0	0	0	0	0	0	0	0	0	0
CRv4_Au5.s3.g10453.t1	0	0	0	0	0	0	0	0	0	0	0	0	1
CRv4_Au5.s3.g10521.t1	0	0	0	0	0	1	0	0	0	0	0	1	1
CRv4_Au5.s3.g10595.t1	0	0	0	0	0	0	0	0	0	0	0	0	0
CRv4_Au5.s3.g10641.t1	0	1	0	0	0	1	0	1	1	0	0	1	1
CRv4_Au5.s3.g10795.t1	1	1	0	0	1	1	1	1	1	0	1	1	1
CRv4_Au5.s3.g10798.t1	0	0	0	0	0	0	1	0	0	0	0	0	1
CRv4_Au5.s3.g10824.t1	0	0	0	0	0	0	0	0	0	0	0	0	1
CRv4_Au5.s3.g10986.t1	0	0	0	0	0	0	0	0	0	0	0	0	1
CRv4_Au5.s3.g11023.t1	0	0	0	0	0	0	0	0	0	0	1	1	1
CRv4_Au5.s3.g11119.t1	0	0	0	0	0	0	0	0	0	0	0	0	1
CRv4_Au5.s3.g11276.t1	1	1	1	0	1	1	1	0	1	0	0	1	1
CRv4_Au5.s3.g11354.t1	0	0	0	0	0	0	0	0	0	0	0	0	1
CRv4_Au5.s4.g11573.t1	0	0	0	0	0	0	0	0	0	0	0	0	1
CRv4_Au5.s4.g11600.t1	1	1	1	1	1	1	1	1	1	1	1	1	1
CRv4_Au5.s4.g11803.t1	0	0	0	0	0	1	0	0	0	0	0	0	1
CRv4_Au5.s41.g11876.t1	0	0	0	0	0	0	1	0	0	0	1	1	1
CRv4_Au5.s46.g11917.t1	0	0	0	0	0	0	1	0	0	0	0	1	1
CRv4_Au5.s46.g11918.t1	1	1	1	0	1	1	1	1	1	1	1	1	1
CRv4_Au5.s5.g12193.t1	0	0	0	0	0	0	0	0	0	0	1	1	1
CRv4_Au5.s5.g12205.t1	1	1	1	1	1	1	1	1	1	1	1	1	1
CRv4_Au5.s5.g12205.t2	1	1	1	1	1	1	1	1	1	1	1	1	1
CRv4_Au5.s5.g12218.t1	0	0	0	0	0	0	0	0	0	0	1	1	1
CRv4_Au5.s6.g12536.t1	0	0	0	0	0	0	0	0	0	0	0	0	1
CRv4_Au5.s6.g12596.t1	1	1	1	0	0	1	1	0	1	0	1	1	1
CRv4_Au5.s6.g12600.t1	1	1	1	0	1	1	1	0	1	1	1	1	1
CRv4_Au5.s6.g12602.t1	1	1	1	0	1	1	1	1	1	1	1	1	1
CRv4_Au5.s6.g12607.t1	0	0	0	0	0	1	0	0	0	0	0	0	1
CRv4_Au5.s6.g12661.t1	0	0	0	0	0	0	0	0	0	0	0	0	0
CRv4_Au5.s6.g12662.t1	0	0	0	0	0	0	0	0	0	0	0	0	0
CRv4_Au5.s6.g12663.t1	0	0	0	0	0	0	0	0	0	0	0	0	1
CRv4_Au5.s6.g12674.t1	1	1	1	0	1	1	1	1	1	1	1	1	1
CRv4_Au5.s6.g12686.t1	0	0	0	0	0	0	0	0	0	0	0	0	1
CRv4_Au5.s6.g12851.t1	0	0	0	0	0	0	1	0	0	0	1	1	1
CRv4_Au5.s6.g12862.t1	0	0	0	0	0	0	1	0	1	0	0	1	1
CRv4_Au5.s6.g12872.t1	0	0	0	0	0	0	1	0	0	0	1	1	1
CRv4_Au5.s6.g12919.t1	0	0	0	0	0	0	0	0	0	0	0	0	0
CRv4_Au5.s6.g13001.t1	0	0	0	0	0	1	0	0	1	0	0	0	1
CRv4_Au5.s6.g13061.t1	0	0	0	0	0	0	1	0	0	0	1	1	1
CRv4_Au5.s6.g13079.t1	0	0	0	0	0	0	1	0	0	0	1	1	1
CRv4_Au5.s6.g13125.t1	1	1	1	0	1	1	1	1	1	1	1	1	1
CRv4_Au5.s6.g13173.t1	0	0	0	0	0	0	0	0	0	0	0	0	1
CRv4_Au5.s6.g13230.t1	1	1	1	1	1	1	1	1	1	1	0	1	1
CRv4_Au5.s6.g13244.t1	0	1	0	0	1	0	1	0	0	0	1	1	1
CRv4_Au5.s6.g13302.t1	0	0	0	0	0	0	1	0	0	0	0	0	1
CRv4_Au5.s6.g13383.t1	1	1	1	0	1	1	1	1	1	1	1	1	1
CRv4_Au5.s6.g13409.t1	0	0	0	0	0	1	1	1	1	0	1	1	1
CRv4_Au5.s6.g13513.t1	0	0	0	0	0	0	1	0	0	0	0	1	1
CRv4_Au5.s6.g13523.t1	1	0	0	0	0	0	1	0	0	0	1	1	1
CRv4_Au5.s6.g13541.t1	0	0	0	0	0	0	0	0	0	0	0	0	0
CRv4_Au5.s6.g13556.t1	0	0	0	0	0	0	0	0	0	0	0	0	0
CRv4_Au5.s6.g13574.t1	1	1	0	0	0	1	1	1	0	0	0	1	1
CRv4_Au5.s6.g13617.t1	0	0	0	0	0	0	0	0	0	0	0	0	0
CRv4_Au5.s7.g13919.t1	0	0	0	0	0	0	0	0	0	0	0	0	1
CRv4_Au5.s7.g14002.t1	0	0	0	0	0	0	0	0	0	0	0	0	1
CRv4_Au5.s7.g14003.t1	0	0	0	0	0	0	0	0	0	0	0	0	0
CRv4_Au5.s7.g14019.t1	0	1	0	0	1	1	0	0	1	0	1	1	1
CRv4_Au5.s7.g14042.t1	1	1	0	1	1	1	1	1	1	1	1	1	1
CRv4_Au5.s7.g14150.t1	1	1	0	0	0	1	1	1	0	0	0	1	1
CRv4_Au5.s7.g14228.t1	1	1	1	0	0	1	1	0	1	0	1	1	1
CRv4_Au5.s7.g14241.t1	0	0	0	0	0	0	1	0	0	0	1	1	1
CRv4_Au5.s7.g14333.t1	0	0	0	0	0	0	1	0	0	0	1	1	1
CRv4_Au5.s7.g14404.t1	0	0	0	0	0	0	0	0	0	0	0	0	1
CRv4_Au5.s7.g14417.t1	0	0	0	0	0	0	0	0	0	0	0	0	1
CRv4_Au5.s7.g14533.t1	0	0	0	0	0	0	0	0	0	0	0	0	0
CRv4_Au5.s7.g14544.t1	1	1	1	0	1	1	1	1	1	0	1	1	1
CRv4_Au5.s8.g14667.t1	1	1	1	0	0	0	0	1	1	0	1	1	1
CRv4_Au5.s8.g14669.t1	0	0	0	0	0	1	1	0	0	0	0	1	1
CRv4_Au5.s8.g14670.t1	0	0	0	0	0	1	1	0	0	0	0	1	1
CRv4_Au5.s8.g14723.t1	0	0	0	0	0	0	0	0	0	0	0	0	1
CRv4_Au5.s8.g14736.t1	1	1	1	0	1	1	1	1	1	1	1	1	1
CRv4_Au5.s8.g14831.t1	0	0	0	0	0	1	0	0	1	0	0	0	1
CRv4_Au5.s8.g14973.t2	0	0	0	0	0	0	0	0	0	0	0	0	0
CRv4_Au5.s8.g15049.t1	1	1	1	0	1	1	1	1	1	1	1	1	1
CRv4_Au5.s8.g15107.t1	1	1	1	0	1	1	1	1	1	1	1	1	1
CRv4_Au5.s9.g15209.t1	1	1	1	0	1	1	1	1	1	1	1	1	1
CRv4_Au5.s9.g15314.t1	1	1	1	1	1	1	1	1	1	1	1	1	1
CRv4_Au5.s9.g15352.t1	0	0	0	0	0	0	0	0	0	0	0	0	1
CRv4_Au5.s9.g15368.t1	1	1	1	0	1	1	1	1	1	1	1	1	1
CRv4_Au5.s9.g15392.t1	0	0	0	0	0	1	1	0	1	0	1	1	1
CRv4_Au5.s9.g15537.t1	1	0	1	1	1	1	1	1	1	1	0	1	1
CRv4_Au5.s9.g15689.t1	0	0	0	0	0	0	1	0	0	0	0	1	1
CRv4_Au5.s9.g15690.t1	0	0	0	0	0	1	1	0	1	0	1	1	1
CRv4_Au5.s9.g15694.t1	1	1	0	0	0	1	1	1	0	0	0	1	1
CRv4_Au5.s9.g15789.t1	1	1	1	0	1	1	1	1	1	1	1	1	1
CRv4_Au5.s1.g1012.t1	1	1	0	0	1	1	0	1	0	1	0	1	1
CRv4_Au5.s1.g1020.t1	0	0	0	0	0	0	0	0	0	0	0	0	1
CRv4_Au5.s1.g1056.t1	1	1	0	0	0	1	1	1	1	0	1	1	1
CRv4_Au5.s1.g1060.t1	0	0	0	0	0	0	1	0	1	0	1	0	1
CRv4_Au5.s1.g1073.t1	1	1	0	1	0	1	0	0	1	0	1	1	1
CRv4_Au5.s1.g1073.t2	1	1	0	1	0	1	0	0	1	0	1	1	1
CRv4_Au5.s1.g1108.t1	1	1	0	0	1	1	1	1	1	0	1	1	1
CRv4_Au5.s1.g1160.t1	1	0	0	0	0	1	0	0	0	0	1	1	1
CRv4_Au5.s1.g1191.t1	1	1	1	1	1	1	1	1	1	1	1	1	1
CRv4_Au5.s1.g1194.t1	0	1	1	0	1	1	1	1	1	0	1	1	1
CRv4_Au5.s1.g1214.t1	0	0	1	0	0	1	1	0	1	0	0	1	1
CRv4_Au5.s1.g1215.t1	0	0	1	0	0	1	1	0	1	0	0	1	1
CRv4_Au5.s1.g1224.t1	1	1	1	1	1	1	0	1	1	1	1	1	1
CRv4_Au5.s1.g1248.t1	0	0	0	0	0	0	0	0	0	0	0	0	0
CRv4_Au5.s1.g1265.t1	0	1	1	0	0	1	1	1	1	0	0	1	1
CRv4_Au5.s1.g1272.t1	0	0	0	0	0	0	1	0	0	0	1	1	1
CRv4_Au5.s1.g1279.t1	1	1	1	1	1	1	1	1	1	1	1	1	1
CRv4_Au5.s1.g1280.t1	0	0	0	0	0	0	0	0	0	0	0	0	0
CRv4_Au5.s1.g1301.t1	0	0	0	0	0	0	0	0	0	0	0	0	0
CRv4_Au5.s1.g1303.t1	0	0	0	0	0	0	0	0	0	0	0	0	1
CRv4_Au5.s1.g1337.t1	0	0	0	0	0	0	0	0	0	0	0	0	0
CRv4_Au5.s1.g1339.t1	0	0	0	0	0	0	0	0	0	0	0	0	0
CRv4_Au5.s1.g1374.t1	0	0	0	0	0	0	0	0	0	0	0	0	0
CRv4_Au5.s1.g1397.t1	0	0	0	0	0	1	0	0	0	0	0	0	0
CRv4_Au5.s1.g1425.t1	1	1	1	0	1	1	1	1	1	1	1	1	1
CRv4_Au5.s1.g1489.t1	0	0	0	0	0	0	0	0	0	0	0	0	0
CRv4_Au5.s1.g1496.t1	0	0	0	0	0	0	0	0	0	0	0	0	1
CRv4_Au5.s1.g1537.t1	1	1	0	0	1	1	1	0	1	0	1	1	1
CRv4_Au5.s1.g1557.t1	1	1	1	1	1	1	1	1	1	1	1	1	1
CRv4_Au5.s1.g1566.t1	0	0	0	0	0	0	0	0	0	0	0	0	0
CRv4_Au5.s1.g1576.t1	0	1	1	0	0	1	1	0	0	1	0	1	1
CRv4_Au5.s1.g1600.t1	0	0	0	0	0	1	0	0	1	0	0	0	1
CRv4_Au5.s1.g1601.t1	0	0	0	0	0	0	0	0	0	0	0	0	0
CRv4_Au5.s1.g1622.t1	1	1	0	0	1	1	1	1	1	1	0	1	1
CRv4_Au5.s1.g1623.t1	1	0	1	1	0	0	1	0	1	0	1	1	1
CRv4_Au5.s1.g1656.t1	0	1	0	0	1	1	1	1	1	0	1	1	1
CRv4_Au5.s1.g1674.t1	1	1	1	0	1	1	1	1	1	1	1	1	1
CRv4_Au5.s1.g1713.t1	1	1	0	0	0	1	0	1	1	0	0	1	1
CRv4_Au5.s1.g1719.t1	1	1	0	0	1	0	0	1	1	0	0	1	1
CRv4_Au5.s1.g1728.t1	0	0	0	0	0	0	0	0	0	0	0	0	0
CRv4_Au5.s1.g1730.t1	0	0	0	0	0	0	0	1	0	0	0	1	1
CRv4_Au5.s1.g1736.t1	0	0	1	0	0	1	1	0	0	0	1	1	1
CRv4_Au5.s1.g1737.t1	1	0	0	0	1	1	1	1	1	0	1	1	1
CRv4_Au5.s1.g1743.t1	1	1	0	0	1	1	1	0	1	0	1	1	1
CRv4_Au5.s1.g1752.t1	1	1	1	0	1	1	1	1	1	0	1	1	1
CRv4_Au5.s1.g1822.t1	1	1	1	0	1	1	0	1	1	0	1	1	1
CRv4_Au5.s1.g1823.t1	0	0	0	0	0	0	1	0	1	0	0	1	1
CRv4_Au5.s1.g1834.t1	0	0	0	0	0	0	0	0	0	0	0	0	1
CRv4_Au5.s1.g1862.t1	0	0	0	0	0	0	0	0	0	0	0	1	1
CRv4_Au5.s1.g1879.t1	0	0	0	0	0	0	0	0	0	0	0	0	0
CRv4_Au5.s1.g1886.t1	0	0	0	0	0	0	0	0	0	0	0	0	0
CRv4_Au5.s1.g1928.t1	1	1	1	0	1	1	1	0	1	0	1	1	1
CRv4_Au5.s1.g1947.t1	0	1	1	0	0	0	0	1	1	0	1	0	1
CRv4_Au5.s1.g1958.t1	0	0	0	0	0	0	0	0	0	0	0	0	1
CRv4_Au5.s1.g1969.t1	1	1	0	0	0	0	1	0	1	0	1	1	1
CRv4_Au5.s1.g1986.t1	0	0	0	0	0	0	1	0	0	0	1	1	1
CRv4_Au5.s1.g2006.t1	1	1	1	0	1	1	1	1	1	0	1	1	1
CRv4_Au5.s1.g2028.t1	0	0	0	0	0	0	0	0	0	0	0	0	1
CRv4_Au5.s1.g2031.t1	0	0	0	0	0	0	0	0	0	0	0	0	1
CRv4_Au5.s1.g2037.t1	0	0	0	0	0	0	0	0	0	0	0	0	0
CRv4_Au5.s1.g2088.t1	1	1	1	1	1	1	1	1	1	0	1	1	1
CRv4_Au5.s1.g2116.t1	0	0	0	0	0	0	0	0	0	0	0	0	0
CRv4_Au5.s1.g2118.t1	0	0	0	0	0	0	0	0	0	0	0	0	0
CRv4_Au5.s1.g2123.t1	1	1	0	0	0	1	0	0	1	0	0	1	1
CRv4_Au5.s1.g2142.t1	1	1	0	0	1	1	1	1	1	1	1	1	1
CRv4_Au5.s1.g2163.t1	1	1	1	1	0	1	1	1	1	1	1	1	1
CRv4_Au5.s1.g2164.t1	1	0	1	0	0	1	1	0	1	0	1	1	1
CRv4_Au5.s1.g2185.t1	0	0	0	0	0	0	1	0	1	0	1	1	1
CRv4_Au5.s1.g2188.t1	0	1	1	0	0	1	1	1	1	0	1	1	1
CRv4_Au5.s1.g2199.t1	1	1	1	1	1	1	1	1	1	1	1	1	1
CRv4_Au5.s1.g2200.t1	0	0	1	0	0	0	0	0	1	0	0	1	1
CRv4_Au5.s1.g2204.t1	0	0	0	0	0	0	0	0	0	0	0	0	0
CRv4_Au5.s1.g2234.t1	1	1	1	0	1	1	1	1	1	0	1	1	1
CRv4_Au5.s1.g2264.t1	0	0	1	0	0	1	1	0	1	0	1	1	1
CRv4_Au5.s1.g2309.t1	0	0	0	0	0	0	0	0	0	0	0	0	0
CRv4_Au5.s1.g2318.t1	0	0	1	0	0	0	1	0	1	0	1	1	1
CRv4_Au5.s1.g2348.t1	1	1	1	1	1	1	1	1	1	1	0	1	1
CRv4_Au5.s1.g981.t1	0	0	0	0	0	0	1	0	0	0	1	1	1
CRv4_Au5.s1.g987.t1	0	0	0	0	0	1	0	0	0	0	1	1	1
CRv4_Au5.s10.g101.t1	0	0	0	0	0	0	0	0	0	0	0	0	1
CRv4_Au5.s10.g104.t1	1	1	1	0	1	1	0	1	1	1	1	1	1
CRv4_Au5.s10.g117.t1	1	1	1	1	1	1	1	1	1	1	1	1	1
CRv4_Au5.s10.g122.t1	0	0	0	0	0	0	0	0	0	0	0	0	0
CRv4_Au5.s10.g124.t2	1	0	1	0	0	1	0	0	1	0	0	1	1
CRv4_Au5.s10.g135.t1	1	1	1	0	1	1	1	1	1	1	1	1	1
CRv4_Au5.s10.g148.t1	1	1	0	1	1	0	0	1	0	1	0	1	1
CRv4_Au5.s10.g155.t1	0	0	0	0	0	0	0	0	0	0	0	0	0
CRv4_Au5.s10.g221.t1	0	1	0	0	0	1	1	0	0	0	1	1	1
CRv4_Au5.s10.g233.t1	0	0	0	0	0	1	1	0	0	0	1	1	1
CRv4_Au5.s10.g252.t1	0	0	1	0	0	1	1	0	1	0	0	1	1
CRv4_Au5.s10.g257.t1	0	1	0	0	0	1	0	0	1	0	1	1	1
CRv4_Au5.s10.g284.t1	0	0	1	0	0	1	1	0	1	0	0	1	1
CRv4_Au5.s10.g308.t1	0	0	0	0	0	0	0	0	0	0	1	0	1
CRv4_Au5.s10.g320.t1	0	1	0	0	0	1	0	1	1	0	1	1	1
CRv4_Au5.s10.g337.t1	1	1	1	0	1	1	1	1	1	0	1	1	1
CRv4_Au5.s10.g343.t1	0	0	0	0	0	1	0	0	0	0	1	1	1
CRv4_Au5.s10.g346.t1	1	1	1	0	1	1	1	1	1	0	1	1	1
CRv4_Au5.s10.g351.t1	0	0	0	0	0	0	0	0	0	0	0	0	0
CRv4_Au5.s10.g369.t1	1	1	1	1	1	1	1	0	1	1	1	1	1
CRv4_Au5.s10.g373.t1	0	0	0	0	0	0	0	0	1	0	1	1	1
CRv4_Au5.s10.g376.t1	0	0	0	0	0	1	0	0	0	1	0	0	1
CRv4_Au5.s10.g404.t1	0	0	0	0	0	0	0	0	0	0	0	0	0
CRv4_Au5.s10.g406.t1	1	1	1	0	1	1	1	1	1	0	1	1	1
CRv4_Au5.s10.g407.t1	1	1	1	0	1	1	1	1	1	1	1	1	1
CRv4_Au5.s10.g452.t1	0	0	0	0	0	0	1	0	0	0	1	1	1
CRv4_Au5.s10.g48.t1	1	1	1	1	1	1	1	1	1	1	1	1	1
CRv4_Au5.s10.g503.t1	0	1	1	0	0	1	1	1	1	0	0	1	1
CRv4_Au5.s10.g535.t1	1	1	1	1	0	1	1	0	1	1	1	0	1
CRv4_Au5.s10.g58.t1	0	0	0	0	0	0	1	0	0	0	1	1	1
CRv4_Au5.s10.g610.t1	0	0	0	0	0	0	0	0	0	0	0	0	0
CRv4_Au5.s10.g647.t1	1	1	1	0	1	1	1	1	1	1	1	1	1
CRv4_Au5.s10.g679.t1	1	1	1	0	1	1	1	1	1	1	1	1	1
CRv4_Au5.s10.g680.t1	1	1	1	1	1	1	1	1	1	1	1	1	1
CRv4_Au5.s10.g683.t1	0	0	0	0	0	0	0	0	0	0	0	0	1
CRv4_Au5.s10.g774.t1	1	1	1	0	0	1	1	1	1	0	1	1	1
CRv4_Au5.s10.g777.t1	0	0	0	0	0	0	0	0	0	0	0	0	0
CRv4_Au5.s10.g799.t1	0	0	0	0	0	0	0	0	0	0	0	0	0
CRv4_Au5.s10.g807.t1	1	0	1	0	0	1	1	0	0	0	1	1	1
CRv4_Au5.s10.g816.t1	0	0	0	0	0	0	0	0	0	0	0	0	0
CRv4_Au5.s10.g819.t1	1	1	1	1	1	1	1	1	1	1	1	1	1
CRv4_Au5.s10.g832.t1	0	1	1	0	0	1	1	1	1	0	0	1	1
CRv4_Au5.s10.g84.t1	1	1	1	1	0	1	1	1	1	1	1	1	1
CRv4_Au5.s10.g840.t1	1	1	1	1	1	1	1	1	1	1	0	1	1
CRv4_Au5.s10.g86.t1	0	0	0	0	0	0	0	0	0	0	0	0	1
CRv4_Au5.s10.g868.t1	0	0	0	0	0	0	0	0	0	0	0	0	0
CRv4_Au5.s10.g896.t1	1	1	1	0	1	1	1	1	1	0	1	1	1
CRv4_Au5.s10.g939.t1	0	0	0	0	0	0	0	0	0	0	0	0	0
CRv4_Au5.s10.g960.t2	0	1	0	0	1	0	1	1	0	0	1	1	1
CRv4_Au5.s11.g2423.t1	1	0	0	0	0	1	0	0	0	0	1	1	1
CRv4_Au5.s11.g2426.t1	1	1	0	0	0	1	1	0	1	0	1	1	1
CRv4_Au5.s11.g2513.t1	1	1	1	1	1	1	1	1	1	1	1	1	1
CRv4_Au5.s11.g2516.t1	0	0	0	0	0	0	1	0	1	0	0	1	1
CRv4_Au5.s11.g2527.t1	0	0	0	0	0	1	1	0	1	1	1	1	1
CRv4_Au5.s11.g2553.t1	0	1	0	1	0	0	0	0	0	1	0	1	1
CRv4_Au5.s11.g2570.t1	1	1	1	0	0	1	1	1	1	1	1	1	1
CRv4_Au5.s11.g2578.t1	0	0	0	0	0	0	0	0	0	0	0	0	1
CRv4_Au5.s11.g2607.t1	0	0	0	0	0	0	0	0	0	0	0	0	1
CRv4_Au5.s11.g2609.t1	1	0	0	0	0	0	1	0	0	0	1	1	1
CRv4_Au5.s11.g2702.t1	0	1	1	0	0	1	1	1	1	0	0	1	1
CRv4_Au5.s11.g2708.t1	0	0	0	0	0	0	0	0	1	0	1	1	1
CRv4_Au5.s11.g2709.t1	0	0	1	0	0	1	1	0	1	0	1	1	1
CRv4_Au5.s12.g2758.t1	1	1	1	1	1	1	1	1	1	1	1	1	1
CRv4_Au5.s12.g2759.t1	0	0	0	0	0	0	0	0	0	0	0	0	1
CRv4_Au5.s12.g2763.t1	1	1	0	0	1	1	1	1	1	0	1	1	1
CRv4_Au5.s12.g2771.t1	0	0	0	0	0	0	0	0	0	0	0	0	0
CRv4_Au5.s12.g2774.t1	0	0	0	0	0	0	0	0	0	0	0	0	0
CRv4_Au5.s12.g2782.t1	1	1	1	1	1	1	1	1	1	1	1	1	1
CRv4_Au5.s12.g2789.t1	1	1	1	0	1	1	1	1	1	0	1	1	1
CRv4_Au5.s12.g2807.t1	0	0	0	0	0	0	0	0	0	0	1	1	1
CRv4_Au5.s12.g2822.t1	1	1	1	1	1	1	1	1	1	1	1	1	1
CRv4_Au5.s12.g2840.t1	0	0	0	0	0	0	0	0	0	0	0	0	1
CRv4_Au5.s12.g2861.t1	0	0	0	0	0	0	0	0	1	0	1	1	1
CRv4_Au5.s12.g2872.t1	1	0	0	1	1	1	1	1	1	1	1	1	1
CRv4_Au5.s12.g2885.t1	1	0	0	0	0	0	1	0	0	0	0	1	1
CRv4_Au5.s12.g2898.t1	1	1	1	0	1	1	0	1	1	0	1	1	1
CRv4_Au5.s12.g2920.t1	0	1	1	0	1	1	0	1	1	0	1	1	1
CRv4_Au5.s12.g2932.t1	1	1	1	0	1	1	1	1	1	0	1	1	1
CRv4_Au5.s12.g2970.t1	1	1	1	1	1	1	1	1	1	1	1	1	1
CRv4_Au5.s12.g2979.t1	0	0	1	0	0	1	1	0	1	0	1	1	1
CRv4_Au5.s12.g3008.t1	1	1	1	0	0	1	1	0	1	0	1	1	1
CRv4_Au5.s12.g3012.t1	0	0	0	0	0	0	0	0	0	0	0	0	0
CRv4_Au5.s12.g3028.t1	0	0	0	0	0	0	1	1	1	0	0	1	1
CRv4_Au5.s12.g3044.t1	0	0	0	0	0	0	1	0	0	0	1	1	1
CRv4_Au5.s12.g3057.t1	0	0	0	0	0	0	0	0	0	0	0	0	0
CRv4_Au5.s12.g3058.t1	0	0	0	0	0	0	0	0	0	0	0	0	0
CRv4_Au5.s12.g3076.t1	1	1	1	0	1	1	1	1	1	1	1	1	1
CRv4_Au5.s12.g3139.t1	0	0	1	0	0	1	1	0	0	0	0	1	1
CRv4_Au5.s12.g3144.t1	1	0	0	0	0	0	1	0	1	0	0	1	1
CRv4_Au5.s12.g3172.t1	0	1	0	0	0	1	0	0	1	0	0	1	1
CRv4_Au5.s12.g3222.t1	1	1	1	1	1	1	1	1	1	1	1	1	1
CRv4_Au5.s12.g3245.t1	0	0	1	0	0	1	0	0	1	0	1	1	1
CRv4_Au5.s12.g3262.t1	1	1	1	0	1	1	0	1	1	0	1	1	1
CRv4_Au5.s12.g3265.t1	0	0	0	0	0	0	0	0	0	0	0	0	0
[truncated: 657 more rows]

## Sheet:  Table S4
Table S4 List of dynamically co-conserved pairs in the network
[truncated: 909 more rows]

[truncated: 16 more sheets:  Table S5,  Table S6,  Table S7,  Table S8,  Table S9,  Table S10,  Table S11,  Table S12,  Table S13,  Table S14,  Table S15,  Table S16, Table S17, Table S18, Table S19, Table S20]
